# Supplementary material for: Multiconfiguration Pair-Density Functional Theory for Transition Metal Silicide Bond Dissociation Energies, Bond Lengths, and State Orderings
Source: MDPI journal article supplement (doi:10.3390/molecules26102881), 2021-05-13
Supplement: s1 [file s1]

# **Supporting Information: Multiconfiguration pair-density functional theory for the calculation of transition metal silicide bond dissociation energies, bond lengths, and state orderings**

Meagan S. Oakley,<sup>\*,†</sup> Donald G. Truhlar,<sup>†</sup> and Laura Gagliardi<sup>‡</sup>

<sup>†</sup>*Department of Chemistry, Chemical Theory Center, and Minnesota Supercomputing  
Institute, University of Minnesota, Minneapolis, MN, 55455, United States*

<sup>‡</sup>*Department of Chemistry, Pritzker School of Molecular Engineering, James Franck  
Institute, Chicago Center for Theoretical Chemistry, The University of Chicago, Chicago,  
IL, 60637, United States*

E-mail: moakley@umn.edu

# Example Input Files for CAS-PDFT and SP-PDFT in OpenMolcas

## CAS-PDFT:

```
>>export DIST=0.95
>>foreach L in ( 1 .. 250 )
>>eval DIST=$DIST+0.05

&GATEWAY

Coord

2

VSi molecule

V 0 0 0

Si $DIST 0 0

BASIS= ANO-RCC-VTZP

GROUP=Full

&SEWARD

grid input

grid=ultrafine

end of grid input

&RASSCF

LumOrb

SYMMETRY=4

SPIN=4

nActEl = 7 0 0

INACTIVE = 9 3 0 3

RAS2 = 4 2 2 2

>>COPY $Project.RasOrb INPORB
```

```

&MCPDFT
KSDFT=ftblyp
>>enddo

SP-PDFT:

>>export DIST=0.95
>>foreach L in ( 1 .. 250)
>>eval DIST=$DIST+0.05

&GATEWAY

Coord

2

TaSi molecule

Ta 0 0 0

Si $DIST 0 0

BASIS= ANO-RCC-VTZP

GROUP=Full

RICD

&SEWARD

grid input

grid=ultrafine

end of grid input

&RASSCF

LumOrb

SYMMETRY=4

SPIN=4

LEVS=1.5

nActEl = 7 0 0

INACTIVE = 19 9 3 9

```

```

GASSCF
4
4 0 0 0
3 3
0 2 0 0
4 4
0 0 2 0
5 5
0 0 0 2
7 7
>>COPY $Project.RasOrb INPORB
&MCPDFT
KSDFT=ftblyp
NEWIPH
CIReStart
CIONLY
nActEl = 7 0 0
INACTIVE = 19 9 3 9
GASSCF
4
4 0 0 0
3 3
0 2 0 0
4 4
0 0 2 0
5 5
0 0 0 2

```

```
7 7
Symmetry=4
Spin=4
LEVS=1.5
orblisting
all
END
>>enddo
```

# Ground State CASSCF Wavefunction at $r_e$ for VSi, NbSi, and TaSi

Table S1: The composition and weights of the ground state  $^4\Pi$  wavefunction for VSi. The molecular configurations are organized in terms of orbital symmetry.

| Configuration |       |       |       | Coefficient | Weight  |
|---------------|-------|-------|-------|-------------|---------|
| $a_1$         | $b_2$ | $a_2$ | $b_1$ |             |         |
| 0u20          | d0    | u0    | uu    | -0.62283    | 0.38792 |
| 0u20          | u0    | u0    | 20    | 0.44518     | 0.19818 |
| 0u20          | u0    | u0    | 02    | -0.43631    | 0.19037 |
| 0u20          | u0    | d0    | uu    | -0.35977    | 0.12943 |
| 0u20          | u0    | u0    | du    | -0.12793    | 0.01637 |
| 0u02          | d0    | u0    | uu    | 0.11969     | 0.01432 |
| 0u00          | d2    | u0    | uu    | -0.10748    | 0.01155 |
| 0u20          | u0    | u0    | ud    | 0.09770     | 0.00954 |
| 0u02          | u0    | u0    | 20    | -0.08553    | 0.00732 |
| 0u02          | u0    | u0    | 02    | 0.08382     | 0.00703 |
| 0u00          | u2    | u0    | 20    | 0.07682     | 0.00590 |
| 0u00          | u2    | u0    | 02    | -0.07533    | 0.00567 |
| 0u02          | u0    | d0    | uu    | 0.06911     | 0.00478 |
| 0u00          | u2    | d0    | uu    | -0.06211    | 0.00386 |

Table S2: The composition and weights of the ground state  $^4\Pi$  wavefunction for NbSi. The molecular configurations are organized in terms of orbital symmetry.

| Configuration  |                |                |                | Coefficient | Weight  |
|----------------|----------------|----------------|----------------|-------------|---------|
| a <sub>1</sub> | b <sub>2</sub> | a <sub>2</sub> | b <sub>1</sub> |             |         |
| 00u2           | u0             | u0             | 20             | -0.37736    | 0.14240 |
| 00u2           | u0             | u0             | 02             | 0.35578     | 0.12658 |
| 00u2           | u0             | u0             | du             | 0.32134     | 0.10326 |
| 20u0           | u0             | u0             | 20             | -0.25972    | 0.06746 |
| 20u0           | u0             | u0             | 02             | 0.24780     | 0.06141 |
| 00u2           | u0             | u0             | ud             | -0.23867    | 0.05696 |
| 20u0           | u0             | u0             | du             | 0.22247     | 0.04949 |
| u0du           | u0             | u0             | 20             | 0.21034     | 0.04424 |
| u0du           | u0             | u0             | 02             | -0.19973    | 0.03989 |
| u0uu           | u0             | u0             | dd             | 0.19158     | 0.03670 |
| u0du           | u0             | u0             | du             | -0.18213    | 0.03317 |
| u0uu           | d0             | u0             | 20             | 0.17160     | 0.02945 |
| 20u0           | u0             | u0             | ud             | -0.16521    | 0.02729 |
| u0uu           | d0             | u0             | 02             | -0.16265    | 0.02645 |
| u0uu           | d0             | u0             | du             | -0.14762    | 0.02179 |
| u0du           | u0             | u0             | ud             | 0.13335     | 0.01778 |
| u0uu           | u0             | d0             | 20             | -0.13267    | 0.01760 |
| u0uu           | u0             | d0             | 02             | 0.12575     | 0.01581 |
| u0ud           | u0             | u0             | 20             | 0.12236     | 0.01497 |
| u0ud           | u0             | u0             | 02             | -0.11532    | 0.01330 |
| u0uu           | u0             | d0             | du             | 0.11421     | 0.01304 |
| u0uu           | d0             | u0             | ud             | 0.10974     | 0.01204 |
| u0ud           | u0             | u0             | du             | -0.10316    | 0.01064 |
| u0uu           | u0             | d0             | ud             | -0.08491    | 0.00721 |
| u0ud           | u0             | u0             | ud             | 0.08026     | 0.00644 |

Table S3: Configurations and weights corresponding to the ground state  $^4\Pi$  wavefunction for TaSi. The molecular configurations are organized in terms of orbital symmetry.

| Configuration  |                |                |                | Coefficient | Weight  |
|----------------|----------------|----------------|----------------|-------------|---------|
| a <sub>1</sub> | b <sub>2</sub> | a <sub>2</sub> | b <sub>1</sub> |             |         |
| 20u0           | d0             | u0             | uu             | 0.62041     | 0.38490 |
| 20u0           | u0             | u0             | 20             | -0.45712    | 0.20896 |
| 20u0           | u0             | u0             | 02             | 0.42739     | 0.18266 |
| 20u0           | u0             | d0             | uu             | 0.36010     | 0.12967 |
| 20u0           | u0             | u0             | du             | 0.13680     | 0.01872 |
| 02u0           | d0             | u0             | uu             | -0.09237    | 0.00853 |
| 20u0           | u0             | u0             | ud             | -0.08435    | 0.00712 |
| 00u0           | d2             | u0             | uu             | -0.08088    | 0.00654 |
| 02u0           | u0             | u0             | 20             | 0.06785     | 0.00460 |
| 02u0           | u0             | u0             | 02             | -0.06376    | 0.00407 |
| 00u0           | u2             | u0             | 20             | 0.05951     | 0.00354 |
| u000           | d2             | u0             | uu             | 0.05666     | 0.00321 |
| u200           | d0             | u0             | uu             | 0.05660     | 0.00320 |
| 00u0           | u2             | u0             | 02             | -0.05583    | 0.00312 |
| 02u0           | u0             | d0             | uu             | -0.05352    | 0.00286 |



# Active Space Natural Orbitals

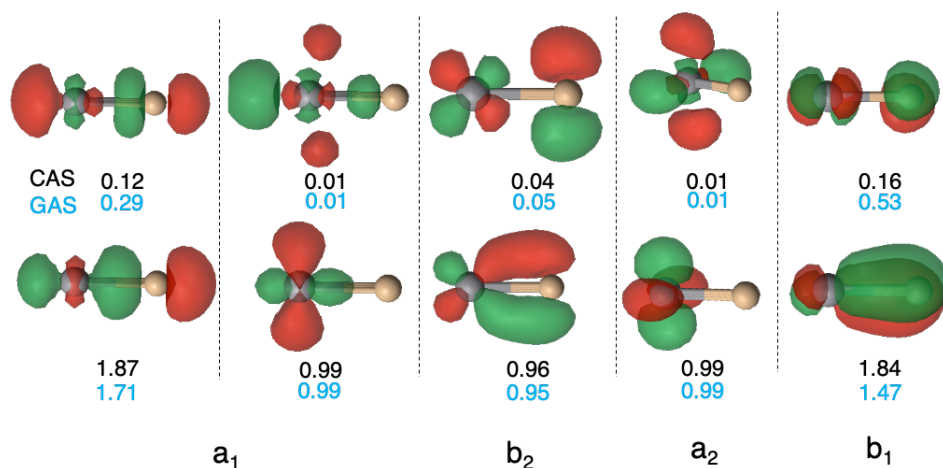

Figure S1: The active space natural (CASSCF) and pseudo-natural (SP) orbitals for vanadium silicide with natural orbital occupation numbers of the  $^4\Pi$  state from CASSCF (black) and SP (blue) wave functions.

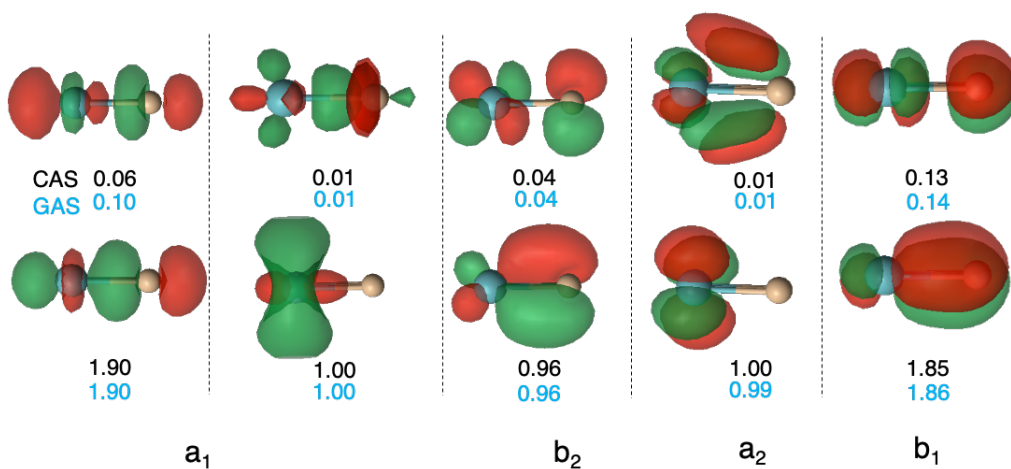

Figure S2: The active space natural (CASSCF) and pseudo-natural (SP) orbitals for niobium silicide with natural orbital occupation numbers of the  $^4\Pi$  state from CASSCF (black) and SP (blue) wave functions.

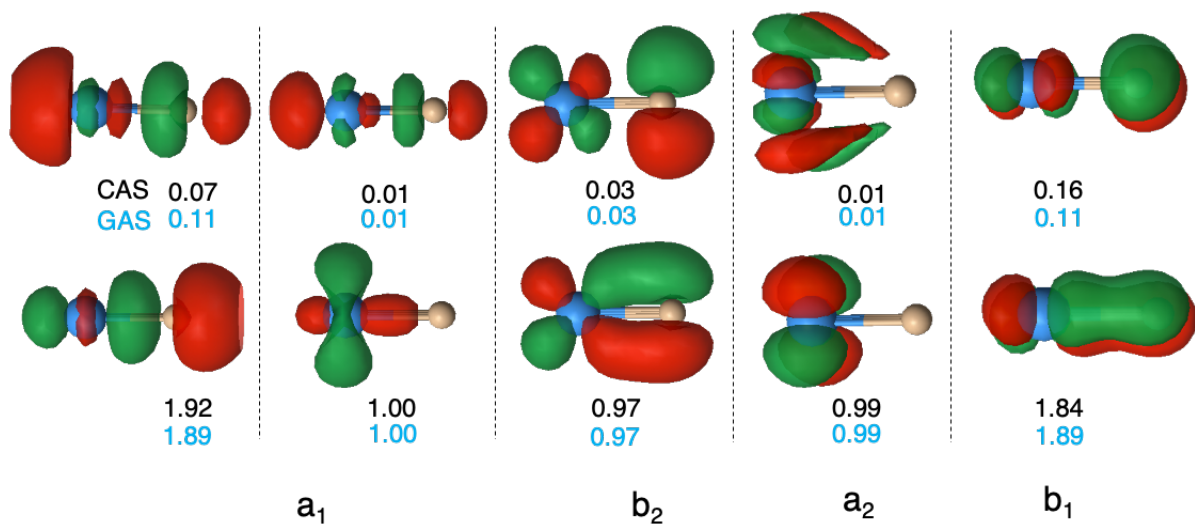

Figure S3: The active space natural (CASSCF) and pseudo-natural (SP) orbitals for tantalum silicide with natural orbital occupation numbers of the  $^4\Pi$  state from CASSCF (black) and SP (blue) wave functions.

# Absolute Energies for Potential Energy Curves

Table S4: The absolute energies in hartree of the potential energy curve of VSi in the  ${}^6\Sigma^+$  state with a CASSCF wave function and nom-CPO active space.

| r (bohr) | CASSCF      | CASPT2      | tpbe        | ftpbe       | trepbe      | ftrepbe     | tblyp       | ftblyp      | torelyp     | ftorelyp    |
|----------|-------------|-------------|-------------|-------------|-------------|-------------|-------------|-------------|-------------|-------------|
| 1.98     | -1235.49304 | -1235.49304 | -1236.68265 | -1236.43293 | -1236.88938 | -1237.09100 | -1237.09530 | -1237.29198 | -1237.16526 | -1237.38538 |
| 2.08     | -1235.90976 | -1235.90976 | -1237.10313 | -1236.88311 | -1237.31102 | -1237.51150 | -1237.51632 | -1237.71194 | -1237.58275 | -1237.80151 |
| 2.17     | -1236.23744 | -1236.23744 | -1237.43120 | -1237.30252 | -1237.64018 | -1237.83992 | -1237.84499 | -1238.03976 | -1237.90825 | -1238.12607 |
| 2.27     | -1236.49813 | -1236.49813 | -1237.68823 | -1237.62985 | -1237.89822 | -1238.09749 | -1238.10270 | -1238.29687 | -1238.16312 | -1238.38029 |
| 2.36     | -1236.70410 | -1236.70410 | -1237.85266 | -1238.05400 | -1238.06307 | -1238.26603 | -1238.27192 | -1238.47035 | -1238.31666 | -1238.53874 |
| 2.46     | -1236.86770 | -1236.86770 | -1238.02563 | -1238.22710 | -1238.23685 | -1238.43994 | -1238.44554 | -1238.64406 | -1238.48825 | -1238.71039 |
| 2.55     | -1236.99856 | -1236.99856 | -1238.16671 | -1238.36858 | -1238.37876 | -1238.58222 | -1238.58713 | -1238.78597 | -1238.62824 | -1238.85071 |
| 2.65     | -1237.10403 | -1237.10403 | -1238.28244 | -1238.48503 | -1238.49535 | -1238.69954 | -1238.70310 | -1238.90247 | -1238.74300 | -1238.96614 |
| 2.74     | -1237.16120 | -1237.16120 | -1238.37896 | -1238.58227 | -1238.59273 | -1238.79771 | -1238.79960 | -1238.99937 | -1238.83879 | -1239.06266 |
| 2.83     | -1237.24379 | -1237.24379 | -1238.46088 | -1238.66435 | -1238.67542 | -1238.88111 | -1238.88092 | -1239.08002 | -1238.92007 | -1239.14470 |
| 2.93     | -1237.31666 | -1237.31666 | -1238.53137 | -1238.73389 | -1238.74639 | -1238.95160 | -1238.95099 | -1239.14868 | -1238.98993 | -1239.21389 |
| 3.02     | -1237.37884 | -1237.37884 | -1238.59122 | -1238.79291 | -1238.80671 | -1239.01127 | -1239.01081 | -1239.20739 | -1239.04940 | -1239.27253 |
| 3.12     | -1237.43130 | -1237.43130 | -1238.64156 | -1238.84268 | -1238.85749 | -1239.06154 | -1239.06125 | -1239.25713 | -1239.09938 | -1239.32185 |
| 3.21     | -1237.47530 | -1237.47530 | -1238.68359 | -1238.88425 | -1238.89993 | -1239.10355 | -1239.10344 | -1239.29877 | -1239.14108 | -1239.36297 |
| 3.31     | -1237.51199 | -1237.51199 | -1238.71843 | -1238.91869 | -1238.93518 | -1239.13840 | -1239.13850 | -1239.33333 | -1239.17565 | -1239.39701 |
| 3.40     | -1237.54241 | -1237.54241 | -1238.74711 | -1238.94700 | -1238.96423 | -1239.16709 | -1239.16741 | -1239.36180 | -1239.20410 | -1239.42497 |
| 3.50     | -1237.56744 | -1237.56744 | -1238.77050 | -1238.97005 | -1238.98797 | -1239.19051 | -1239.19107 | -1239.38504 | -1239.22733 | -1239.44775 |
| 3.59     | -1237.58786 | -1237.58786 | -1238.78939 | -1238.98863 | -1239.00720 | -1239.20944 | -1239.21025 | -1239.40383 | -1239.24610 | -1239.46610 |
| 3.68     | -1237.60435 | -1237.60435 | -1238.80443 | -1239.00339 | -1239.02255 | -1239.22453 | -1239.22561 | -1239.41881 | -1239.26106 | -1239.48069 |
| 3.78     | -1237.61751 | -1237.61751 | -1238.81620 | -1239.01491 | -1239.03461 | -1239.23636 | -1239.23771 | -1239.43055 | -1239.27279 | -1239.49207 |
| 3.87     | -1237.62787 | -1237.62787 | -1238.82517 | -1239.02367 | -1239.04387 | -1239.24544 | -1239.24703 | -1239.43954 | -1239.28175 | -1239.50073 |
| 3.97     | -1237.63588 | -1237.63588 | -1238.83177 | -1239.03008 | -1239.05074 | -1239.25216 | -1239.25397 | -1239.44617 | -1239.28833 | -1239.50706 |
| 4.06     | -1237.64195 | -1237.64195 | -1238.83631 | -1239.03449 | -1239.05553 | -1239.25687 | -1239.25886 | -1239.45077 | -1239.29285 | -1239.51138 |
| 4.16     | -1237.64643 | -1237.64643 | -1238.83906 | -1239.03715 | -1239.05853 | -1239.25985 | -1239.26195 | -1239.45361 | -1239.29555 | -1239.51396 |
| 4.35     | -1237.65183 | -1237.65183 | -1238.83997 | -1239.03808 | -1239.05991 | -1239.26144 | -1239.26346 | -1239.45477 | -1239.29623 | -1239.51463 |
| 4.44     | -1237.65324 | -1237.65324 | -1238.83847 | -1239.03668 | -1239.05864 | -1239.26041 | -1239.26221 | -1239.45343 | -1239.29454 | -1239.51309 |
| 4.54     | -1237.65405 | -1237.65405 | -1238.83594 | -1239.03433 | -1239.05636 | -1239.25842 | -1239.25991 | -1239.45109 | -1239.29182 | -1239.51059 |
| 4.63     | -1237.65439 | -1237.65439 | -1238.83262 | -1239.03120 | -1239.05328 | -1239.25568 | -1239.25677 | -1239.44796 | -1239.28830 | -1239.50735 |
| 4.72     | -1237.65437 | -1237.65437 | -1238.82872 | -1239.02753 | -1239.04963 | -1239.25239 | -1239.25303 | -1239.44427 | -1239.28423 | -1239.50361 |
| 4.82     | -1237.65407 | -1237.65407 | -1238.82449 | -1239.02351 | -1239.04565 | -1239.24875 | -1239.24894 | -1239.44023 | -1239.27987 | -1239.49959 |
| 4.91     | -1237.65351 | -1237.65351 | -1238.82012 | -1239.01934 | -1239.04152 | -1239.24495 | -1239.24471 | -1239.43606 | -1239.27543 | -1239.49548 |
| 5.01     | -1237.65275 | -1237.65275 | -1238.81559 | -1239.01498 | -1239.03723 | -1239.24093 | -1239.24033 | -1239.43171 | -1239.27087 | -1239.49120 |
| 5.10     | -1237.65241 | -1237.65241 | -1238.80781 | -1239.00711 | -1239.02967 | -1239.23336 | -1239.23260 | -1239.42355 | -1239.26252 | -1239.48285 |
| 5.20     | -1237.65153 | -1237.65153 | -1238.80530 | -1239.00457 | -1239.02732 | -1239.23100 | -1239.23032 | -1239.42115 | -1239.26012 | -1239.48044 |
| 5.29     | -1237.65042 | -1237.65042 | -1238.80284 | -1239.00207 | -1239.02502 | -1239.22868 | -1239.22811 | -1239.41884 | -1239.25779 | -1239.47810 |
| 5.39     | -1237.64912 | -1237.64912 | -1238.80041 | -1238.99960 | -1239.02273 | -1239.22637 | -1239.22594 | -1239.41658 | -1239.25551 | -1239.47579 |
| 5.48     | -1237.64767 | -1237.64767 | -1238.79802 | -1238.99717 | -1239.02047 | -1239.22408 | -1239.22382 | -1239.41437 | -1239.25325 | -1239.47353 |
| 5.57     | -1237.64610 | -1237.64610 | -1238.79565 | -1238.99477 | -1239.01822 | -1239.22181 | -1239.22174 | -1239.41222 | -1239.25103 | -1239.47130 |
| 5.67     | -1237.64444 | -1237.64444 | -1238.79332 | -1238.99240 | -1239.01600 | -1239.21956 | -1239.21972 | -1239.41012 | -1239.24884 | -1239.46912 |
| 5.76     | -1237.64273 | -1237.64273 | -1238.79102 | -1238.99008 | -1239.01381 | -1239.21734 | -1239.21774 | -1239.40810 | -1239.24669 | -1239.46699 |
| 5.86     | -1237.64098 | -1237.64098 | -1238.78876 | -1238.98780 | -1239.01165 | -1239.21514 | -1239.21582 | -1239.40614 | -1239.24457 | -1239.46490 |
| 5.95     | -1237.63923 | -1237.63923 | -1238.78655 | -1238.98558 | -1239.00952 | -1239.21299 | -1239.21396 | -1239.40427 | -1239.24250 | -1239.46288 |
| 6.05     | -1237.63749 | -1237.63749 | -1238.78438 | -1238.98341 | -1239.00743 | -1239.21088 | -1239.21216 | -1239.40248 | -1239.24048 | -1239.46093 |
| 6.14     | -1237.63580 | -1237.63580 | -1238.78225 | -1238.98128 | -1239.00538 | -1239.20882 | -1239.21044 | -1239.40077 | -1239.23850 | -1239.45903 |
| 6.24     | -1237.63416 | -1237.63416 | -1238.78017 | -1238.97921 | -1239.00336 | -1239.20678 | -1239.20877 | -1239.39915 | -1239.23655 | -1239.45719 |
| 6.33     | -1237.63259 | -1237.63259 | -1238.77811 | -1238.97716 | -1239.00136 | -1239.20478 | -1239.20715 | -1239.39759 | -1239.23464 | -1239.45539 |
| 6.43     | -1237.63111 | -1237.63111 | -1238.77608 | -1238.97516 | -1238.99939 | -1239.20280 | -1239.20558 | -1239.39611 | -1239.23276 | -1239.45363 |
| 6.52     | -1237.62973 | -1237.62973 | -1238.77407 | -1238.97318 | -1238.99743 | -1239.20085 | -1239.20404 | -1239.39468 | -1239.23091 | -1239.45191 |

Table S4: The absolute energies in hartree of the potential energy curve of VSi in the  ${}^6\Sigma^+$  state with a CASSCF wave function and nom-CPO active space.

| r (bohr) | CASSCF      | CASPT2      | tpbe        | ftpbe       | trepvbe     | ftrepvbe    | tblyp       | ftblyp      | torelyp     | ftorelyp    |
|----------|-------------|-------------|-------------|-------------|-------------|-------------|-------------|-------------|-------------|-------------|
| 6.61     | -1237.62846 | -1237.62846 | -1238.77208 | -1238.97124 | -1238.99549 | -1239.19892 | -1239.20254 | -1239.39330 | -1239.22908 | -1239.45021 |
| 6.71     | -1237.62729 | -1237.62729 | -1238.77012 | -1238.96932 | -1238.99359 | -1239.19703 | -1239.20107 | -1239.39196 | -1239.22729 | -1239.44855 |
| 6.80     | -1237.62625 | -1237.62625 | -1238.76820 | -1238.96744 | -1238.99172 | -1239.19518 | -1239.19963 | -1239.39066 | -1239.22555 | -1239.44692 |
| 6.90     | -1237.62531 | -1237.62531 | -1238.76634 | -1238.96563 | -1238.98991 | -1239.19339 | -1239.19824 | -1239.38941 | -1239.22387 | -1239.44536 |
| 6.99     | -1237.62448 | -1237.62448 | -1238.76457 | -1238.96390 | -1238.98819 | -1239.19169 | -1239.19691 | -1239.38822 | -1239.22228 | -1239.44387 |
| 7.09     | -1237.62376 | -1237.62376 | -1238.76289 | -1238.96228 | -1238.98657 | -1239.19010 | -1239.19565 | -1239.38710 | -1239.22081 | -1239.44248 |
| 7.18     | -1237.62312 | -1237.62312 | -1238.76135 | -1238.96077 | -1238.98509 | -1239.18865 | -1239.19450 | -1239.38606 | -1239.21946 | -1239.44120 |
| 7.28     | -1237.62256 | -1237.62256 | -1238.75994 | -1238.95940 | -1238.98373 | -1239.18732 | -1239.19344 | -1239.38510 | -1239.21824 | -1239.44004 |
| 7.37     | -1237.62208 | -1237.62208 | -1238.75866 | -1238.95815 | -1238.98252 | -1239.18613 | -1239.19248 | -1239.38424 | -1239.21716 | -1239.43901 |
| 7.46     | -1237.62166 | -1237.62166 | -1238.75751 | -1238.95703 | -1238.98143 | -1239.18506 | -1239.19163 | -1239.38345 | -1239.21621 | -1239.43809 |
| 7.56     | -1237.62128 | -1237.62128 | -1238.75648 | -1238.95602 | -1238.98047 | -1239.18411 | -1239.19086 | -1239.38274 | -1239.21537 | -1239.43728 |
| 7.65     | -1237.62096 | -1237.62096 | -1238.75556 | -1238.95512 | -1238.97961 | -1239.18326 | -1239.19017 | -1239.38210 | -1239.21463 | -1239.43657 |
| 7.75     | -1237.62067 | -1237.62067 | -1238.75474 | -1238.95430 | -1238.97885 | -1239.18251 | -1239.18956 | -1239.38152 | -1239.21399 | -1239.43594 |
| 7.84     | -1237.62041 | -1237.62041 | -1238.75400 | -1238.95357 | -1238.97817 | -1239.18184 | -1239.18901 | -1239.38100 | -1239.21344 | -1239.43539 |
| 7.94     | -1237.62019 | -1237.62019 | -1238.75333 | -1238.95290 | -1238.97757 | -1239.18124 | -1239.18852 | -1239.38053 | -1239.21295 | -1239.43490 |
| 8.03     | -1237.61998 | -1237.61998 | -1238.75273 | -1238.95230 | -1238.97703 | -1239.18070 | -1239.18808 | -1239.38011 | -1239.21252 | -1239.43447 |
| 8.13     | -1237.61980 | -1237.61980 | -1238.75219 | -1238.95176 | -1238.97655 | -1239.18021 | -1239.18769 | -1239.37972 | -1239.21215 | -1239.43409 |
| 8.22     | -1237.61964 | -1237.61964 | -1238.75170 | -1238.95127 | -1238.97612 | -1239.17978 | -1239.18734 | -1239.37937 | -1239.21183 | -1239.43377 |
| 8.31     | -1237.61949 | -1237.61949 | -1238.75127 | -1238.95082 | -1238.97574 | -1239.17939 | -1239.18702 | -1239.37906 | -1239.21156 | -1239.43348 |
| 8.41     | -1237.61936 | -1237.61936 | -1238.75087 | -1238.95042 | -1238.97540 | -1239.17905 | -1239.18674 | -1239.37877 | -1239.21132 | -1239.43323 |
| 8.50     | -1237.61924 | -1237.61924 | -1238.75051 | -1238.95006 | -1238.97510 | -1239.17874 | -1239.18649 | -1239.37852 | -1239.21111 | -1239.43301 |
| 8.60     | -1237.61914 | -1237.61914 | -1238.75019 | -1238.94973 | -1238.97484 | -1239.17846 | -1239.18627 | -1239.37829 | -1239.21094 | -1239.43282 |
| 8.69     | -1237.61904 | -1237.61904 | -1238.74990 | -1238.94943 | -1238.97460 | -1239.17821 | -1239.18607 | -1239.37808 | -1239.21079 | -1239.43265 |
| 8.79     | -1237.61895 | -1237.61895 | -1238.74964 | -1238.94915 | -1238.97439 | -1239.17799 | -1239.18589 | -1239.37789 | -1239.21066 | -1239.43251 |
| 8.88     | -1237.61887 | -1237.61887 | -1238.74940 | -1238.94890 | -1238.97420 | -1239.17779 | -1239.18573 | -1239.37772 | -1239.21056 | -1239.43239 |
| 8.98     | -1237.61880 | -1237.61880 | -1238.74919 | -1238.94868 | -1238.97403 | -1239.17761 | -1239.18559 | -1239.37756 | -1239.21047 | -1239.43228 |
| 9.07     | -1237.61873 | -1237.61873 | -1238.74899 | -1238.94847 | -1238.97388 | -1239.17745 | -1239.18546 | -1239.37743 | -1239.21040 | -1239.43219 |
| 9.17     | -1237.61867 | -1237.61867 | -1238.74882 | -1238.94829 | -1238.97375 | -1239.17731 | -1239.18535 | -1239.37730 | -1239.21034 | -1239.43211 |
| 9.26     | -1237.61862 | -1237.61862 | -1238.74866 | -1238.94812 | -1238.97364 | -1239.17718 | -1239.18525 | -1239.37719 | -1239.21029 | -1239.43205 |
| 9.35     | -1237.61857 | -1237.61857 | -1238.74852 | -1238.94797 | -1238.97354 | -1239.17707 | -1239.18516 | -1239.37709 | -1239.21026 | -1239.43199 |
| 9.45     | -1237.61852 | -1237.61852 | -1238.74839 | -1238.94783 | -1238.97345 | -1239.17697 | -1239.18509 | -1239.37700 | -1239.21023 | -1239.43195 |
| 9.54     | -1237.61848 | -1237.61848 | -1238.74827 | -1238.94770 | -1238.97337 | -1239.17688 | -1239.18502 | -1239.37693 | -1239.21020 | -1239.43191 |
| 9.64     | -1237.61844 | -1237.61844 | -1238.74817 | -1238.94759 | -1238.97330 | -1239.17679 | -1239.18496 | -1239.37685 | -1239.21019 | -1239.43187 |
| 9.73     | -1237.61841 | -1237.61841 | -1238.74807 | -1238.94748 | -1238.97324 | -1239.17672 | -1239.18491 | -1239.37679 | -1239.21018 | -1239.43185 |
| 9.83     | -1237.61838 | -1237.61838 | -1238.74799 | -1238.94739 | -1238.97319 | -1239.17666 | -1239.18486 | -1239.37673 | -1239.21017 | -1239.43182 |
| 9.92     | -1237.61835 | -1237.61835 | -1238.74791 | -1238.94730 | -1238.97314 | -1239.17660 | -1239.18483 | -1239.37669 | -1239.21017 | -1239.43181 |
| 10.02    | -1237.61832 | -1237.61832 | -1238.74784 | -1238.94722 | -1238.97310 | -1239.17655 | -1239.18479 | -1239.37664 | -1239.21017 | -1239.43179 |
| 10.11    | -1237.61830 | -1237.61830 | -1238.74778 | -1238.94715 | -1238.97307 | -1239.17651 | -1239.18477 | -1239.37661 | -1239.21017 | -1239.43178 |
| 10.20    | -1237.61827 | -1237.61827 | -1238.74772 | -1238.94709 | -1238.97304 | -1239.17647 | -1239.18474 | -1239.37657 | -1239.21018 | -1239.43177 |
| 10.30    | -1237.61825 | -1237.61825 | -1238.74767 | -1238.94703 | -1238.97301 | -1239.17643 | -1239.18472 | -1239.37654 | -1239.21019 | -1239.43176 |
| 10.39    | -1237.61823 | -1237.61823 | -1238.74762 | -1238.94698 | -1238.97299 | -1239.17640 | -1239.18471 | -1239.37652 | -1239.21019 | -1239.43176 |
| 10.49    | -1237.61822 | -1237.61822 | -1238.74758 | -1238.94693 | -1238.97297 | -1239.17637 | -1239.18469 | -1239.37650 | -1239.21020 | -1239.43175 |
| 10.58    | -1237.61820 | -1237.61820 | -1238.74754 | -1238.94688 | -1238.97295 | -1239.17634 | -1239.18468 | -1239.37648 | -1239.21021 | -1239.43174 |
| 10.68    | -1237.61819 | -1237.61819 | -1238.74750 | -1238.94684 | -1238.97293 | -1239.17632 | -1239.18467 | -1239.37646 | -1239.21022 | -1239.43174 |
| 10.77    | -1237.61817 | -1237.61817 | -1238.74747 | -1238.94680 | -1238.97292 | -1239.17630 | -1239.18467 | -1239.37645 | -1239.21023 | -1239.43174 |
| 10.87    | -1237.61816 | -1237.61816 | -1238.74744 | -1238.94676 | -1238.97291 | -1239.17628 | -1239.18467 | -1239.37644 | -1239.21023 | -1239.43174 |
| 10.96    | -1237.61815 | -1237.61815 | -1238.74741 | -1238.94673 | -1238.97290 | -1239.17626 | -1239.18466 | -1239.37643 | -1239.21024 | -1239.43173 |
| 11.05    | -1237.61814 | -1237.61814 | -1238.74739 | -1238.94671 | -1238.97289 | -1239.17624 | -1239.18466 | -1239.37642 | -1239.21025 | -1239.43173 |
| 11.15    | -1237.61812 | -1237.61812 | -1238.74737 | -1238.94668 | -1238.97288 | -1239.17623 | -1239.18466 | -1239.37642 | -1239.21026 | -1239.43173 |
| 11.24    | -1237.61812 | -1237.61812 | -1238.74735 | -1238.94666 | -1238.97287 | -1239.17622 | -1239.18466 | -1239.37641 | -1239.21027 | -1239.43173 |
| 11.34    | -1237.61811 | -1237.61811 | -1238.74733 | -1238.94663 | -1238.97287 | -1239.17621 | -1239.18466 | -1239.37641 | -1239.21027 | -1239.43173 |
| 11.43    | -1237.61810 | -1237.61810 | -1238.74731 | -1238.94661 | -1238.97286 | -1239.17620 | -1239.18466 | -1239.37641 | -1239.21028 | -1239.43172 |



Table S4: The absolute energies in hartree of the potential energy curve of VSi in the  ${}^6\Sigma^+$  state with a CASSCF wave function and nom-CPO active space.

| r (bohr) | CASSCF      | CASPT2      | tpbe        | ftpbe       | trevpbe     | ftrevpbe    | tblyp       | ftblyp      | torelyp     | ftorelyp    |
|----------|-------------|-------------|-------------|-------------|-------------|-------------|-------------|-------------|-------------|-------------|
| 16.44    | -1237.61797 | -1237.61797 | -1238.74710 | -1238.94636 | -1238.97278 | -1239.17605 | -1239.18484 | -1239.37651 | -1239.21031 | -1239.43164 |
| 16.54    | -1237.61797 | -1237.61797 | -1238.74710 | -1238.94636 | -1238.97278 | -1239.17605 | -1239.18484 | -1239.37651 | -1239.21031 | -1239.43164 |
| 16.63    | -1237.61797 | -1237.61797 | -1238.74710 | -1238.94636 | -1238.97278 | -1239.17605 | -1239.18484 | -1239.37651 | -1239.21031 | -1239.43164 |
| 16.72    | -1237.61797 | -1237.61797 | -1238.74710 | -1238.94636 | -1238.97278 | -1239.17605 | -1239.18484 | -1239.37651 | -1239.21031 | -1239.43164 |
| 16.82    | -1237.61797 | -1237.61797 | -1238.74710 | -1238.94636 | -1238.97278 | -1239.17605 | -1239.18484 | -1239.37651 | -1239.21031 | -1239.43164 |
| 16.91    | -1237.61797 | -1237.61797 | -1238.74710 | -1238.94636 | -1238.97278 | -1239.17605 | -1239.18484 | -1239.37651 | -1239.21031 | -1239.43164 |
| 17.01    | -1237.61797 | -1237.61797 | -1238.74710 | -1238.94636 | -1238.97278 | -1239.17605 | -1239.18484 | -1239.37651 | -1239.21031 | -1239.43164 |
| 17.10    | -1237.61797 | -1237.61797 | -1238.74710 | -1238.94636 | -1238.97278 | -1239.17605 | -1239.18484 | -1239.37651 | -1239.21030 | -1239.43164 |
| 17.20    | -1237.61797 | -1237.61797 | -1238.74710 | -1238.94636 | -1238.97278 | -1239.17605 | -1239.18484 | -1239.37651 | -1239.21030 | -1239.43164 |
| 17.29    | -1237.61796 | -1237.61796 | -1238.74710 | -1238.94636 | -1238.97278 | -1239.17605 | -1239.18484 | -1239.37651 | -1239.21030 | -1239.43164 |
| 17.39    | -1237.61796 | -1237.61796 | -1238.74710 | -1238.94636 | -1238.97278 | -1239.17605 | -1239.18484 | -1239.37651 | -1239.21030 | -1239.43164 |
| 17.48    | -1237.61796 | -1237.61796 | -1238.74710 | -1238.94636 | -1238.97278 | -1239.17605 | -1239.18484 | -1239.37651 | -1239.21030 | -1239.43164 |
| 17.57    | -1237.61796 | -1237.61796 | -1238.74710 | -1238.94636 | -1238.97278 | -1239.17605 | -1239.18484 | -1239.37651 | -1239.21030 | -1239.43164 |
| 17.67    | -1237.61796 | -1237.61796 | -1238.74710 | -1238.94636 | -1238.97278 | -1239.17605 | -1239.18485 | -1239.37651 | -1239.21030 | -1239.43164 |
| 17.76    | -1237.61796 | -1237.61796 | -1238.74710 | -1238.94636 | -1238.97278 | -1239.17605 | -1239.18485 | -1239.37651 | -1239.21030 | -1239.43164 |
| 17.86    | -1237.61796 | -1237.61796 | -1238.74710 | -1238.94636 | -1238.97278 | -1239.17605 | -1239.18485 | -1239.37651 | -1239.21030 | -1239.43164 |
| 17.95    | -1237.61796 | -1237.61796 | -1238.74710 | -1238.94636 | -1238.97278 | -1239.17605 | -1239.18485 | -1239.37651 | -1239.21030 | -1239.43164 |
| 18.05    | -1237.61796 | -1237.61796 | -1238.74710 | -1238.94636 | -1238.97278 | -1239.17605 | -1239.18485 | -1239.37651 | -1239.21030 | -1239.43164 |

Table S5: The absolute energies in hartree of the potential energy curve of VSi in the  ${}^4\Pi$  state with a CASSCF wave function and nom-CPO active space.

| Distance | CASSCF      | CASPT2      | tpbe        | ftpbe       | trevpbe     | ftrevpbe    | tblyp       | ftblyp      | torelyp     | ftorelyp    |
|----------|-------------|-------------|-------------|-------------|-------------|-------------|-------------|-------------|-------------|-------------|
| 1.98     | -1235.42564 | -1235.96998 | -1236.69023 | -1236.89100 | -1236.89620 | -1237.10075 | -1237.10031 | -1237.29211 | -1237.16570 | -1237.38751 |
| 2.08     | -1235.84533 | -1236.39046 | -1237.10394 | -1237.30342 | -1237.31102 | -1237.51431 | -1237.51503 | -1237.70527 | -1237.57712 | -1237.79729 |
| 2.17     | -1236.17293 | -1236.71850 | -1237.42670 | -1237.62503 | -1237.63481 | -1237.83697 | -1237.83872 | -1238.02755 | -1237.89825 | -1238.11683 |
| 2.27     | -1236.41049 | -1236.93635 | -1237.64234 | -1237.83982 | -1237.85063 | -1238.05207 | -1238.05682 | -1238.24633 | -1238.10385 | -1238.32144 |
| 2.36     | -1236.62735 | -1237.15205 | -1237.85711 | -1238.05443 | -1238.06640 | -1238.26776 | -1238.27213 | -1238.46132 | -1238.31725 | -1238.53440 |
| 2.46     | -1236.80103 | -1237.32599 | -1238.03023 | -1238.22733 | -1238.24040 | -1238.44157 | -1238.44573 | -1238.63456 | -1238.48917 | -1238.70591 |
| 2.55     | -1236.94126 | -1237.46702 | -1238.17081 | -1238.36773 | -1238.38181 | -1238.58280 | -1238.58672 | -1238.77524 | -1238.62880 | -1238.84521 |
| 2.65     | -1237.05557 | -1237.58253 | -1238.28616 | -1238.48294 | -1238.49791 | -1238.69878 | -1238.70242 | -1238.89067 | -1238.74342 | -1238.95958 |
| 2.74     | -1237.14966 | -1237.60084 | -1238.31149 | -1238.51428 | -1238.52447 | -1238.73129 | -1238.72968 | -1238.92327 | -1238.76974 | -1238.99454 |
| 2.83     | -1237.22781 | -1237.68813 | -1238.39894 | -1238.60158 | -1238.61229 | -1238.81942 | -1238.81674 | -1239.01006 | -1238.85555 | -1239.08099 |
| 2.93     | -1237.29322 | -1237.76634 | -1238.47604 | -1238.67780 | -1238.68966 | -1238.89622 | -1238.89365 | -1239.08610 | -1238.93177 | -1239.15655 |
| 3.02     | -1237.34832 | -1237.83546 | -1238.54286 | -1238.74361 | -1238.75679 | -1238.96245 | -1238.96050 | -1239.15188 | -1238.99847 | -1239.22207 |
| 3.12     | -1237.39503 | -1237.89409 | -1238.59923 | -1238.79919 | -1238.81357 | -1239.01841 | -1239.01712 | -1239.20755 | -1239.05499 | -1239.27752 |
| 3.21     | -1237.43491 | -1237.94243 | -1238.64661 | -1238.84598 | -1238.86138 | -1239.06558 | -1239.06479 | -1239.25452 | -1239.10221 | -1239.32392 |
| 3.31     | -1237.46746 | -1237.98254 | -1238.68651 | -1238.88541 | -1238.90171 | -1239.10537 | -1239.10499 | -1239.29418 | -1239.14182 | -1239.36283 |
| 3.40     | -1237.49751 | -1238.01590 | -1238.71998 | -1238.91845 | -1238.93559 | -1239.13878 | -1239.13877 | -1239.32750 | -1239.17499 | -1239.39538 |
| 3.50     | -1237.52104 | -1238.04352 | -1238.74789 | -1238.94596 | -1238.96388 | -1239.16663 | -1239.16701 | -1239.35533 | -1239.20261 | -1239.42242 |
| 3.59     | -1237.54159 | -1238.06624 | -1238.77094 | -1238.96865 | -1238.98730 | -1239.18964 | -1239.19042 | -1239.37836 | -1239.22543 | -1239.44470 |
| 3.68     | -1237.55872 | -1238.08473 | -1238.78976 | -1238.98714 | -1239.00647 | -1239.20844 | -1239.20961 | -1239.39721 | -1239.24406 | -1239.46283 |
| 3.78     | -1237.57293 | -1238.09958 | -1238.80491 | -1239.00198 | -1239.02196 | -1239.22359 | -1239.22514 | -1239.41244 | -1239.25907 | -1239.47737 |
| 3.87     | -1237.58464 | -1238.11131 | -1238.81687 | -1239.01367 | -1239.03424 | -1239.23556 | -1239.23748 | -1239.42451 | -1239.27092 | -1239.48880 |
| 3.97     | -1237.59425 | -1238.12035 | -1238.82602 | -1239.02260 | -1239.04371 | -1239.24476 | -1239.24702 | -1239.43383 | -1239.28001 | -1239.49750 |
| 4.06     | -1237.60213 | -1238.12707 | -1238.83275 | -1239.02914 | -1239.05073 | -1239.25156 | -1239.25411 | -1239.44075 | -1239.28669 | -1239.50385 |
| 4.16     | -1237.63316 | -1238.13180 | -1238.83735 | -1239.03360 | -1239.05562 | -1239.25628 | -1239.25908 | -1239.44560 | -1239.29127 | -1239.50816 |
| 4.35     | -1237.64265 | -1238.13631 | -1238.84117 | -1239.03728 | -1239.06002 | -1239.26046 | -1239.26358 | -1239.45000 | -1239.29511 | -1239.51161 |
| 4.44     | -1237.64555 | -1238.13655 | -1238.84083 | -1239.03692 | -1239.05995 | -1239.26036 | -1239.26354 | -1239.44999 | -1239.29479 | -1239.51119 |
| 4.54     | -1237.64749 | -1238.13571 | -1238.83926 | -1239.03539 | -1239.05866 | -1239.25908 | -1239.26224 | -1239.44876 | -1239.29325 | -1239.50961 |
| 4.63     | -1237.64865 | -1238.13397 | -1238.83665 | -1239.03285 | -1239.05633 | -1239.25680 | -1239.25988 | -1239.44650 | -1239.29068 | -1239.50706 |

Table S5: The absolute energies in hartree of the potential energy curve of VSi in the  $^4\Pi$  state with a CASSCF wave function and nom-CPO active space.

| Distance | CASSCF      | CASPT2      | tpbe        | ftpbe       | trevpbe     | ftrevpbe    | tblyp       | ftblyp      | torelyp     | ftorelyp    |
|----------|-------------|-------------|-------------|-------------|-------------|-------------|-------------|-------------|-------------|-------------|
| 4.72     | -1237.64917 | -1238.13156 | -1238.83327 | -1239.02956 | -1239.05322 | -1239.25378 | -1239.25671 | -1239.44347 | -1239.28733 | -1239.50380 |
| 4.82     | -1237.64916 | -1238.12865 | -1238.82933 | -1239.02574 | -1239.04955 | -1239.25022 | -1239.25296 | -1239.43986 | -1239.28344 | -1239.50003 |
| 4.91     | -1237.64873 | -1238.12541 | -1238.82506 | -1239.02160 | -1239.04554 | -1239.24635 | -1239.24886 | -1239.43591 | -1239.27923 | -1239.49598 |
| 5.01     | -1237.64795 | -1238.12198 | -1238.82068 | -1239.01733 | -1239.04140 | -1239.24234 | -1239.24463 | -1239.43183 | -1239.27492 | -1239.49184 |
| 5.10     | -1237.64687 | -1238.11848 | -1238.81631 | -1239.01308 | -1239.03727 | -1239.23834 | -1239.24042 | -1239.42775 | -1239.27065 | -1239.48774 |
| 5.20     | -1237.64554 | -1238.11497 | -1238.81204 | -1239.00892 | -1239.03322 | -1239.23441 | -1239.23632 | -1239.42377 | -1239.26649 | -1239.48375 |
| 5.29     | -1237.64402 | -1238.11149 | -1238.80792 | -1239.00490 | -1239.02931 | -1239.23061 | -1239.23237 | -1239.41995 | -1239.26251 | -1239.47993 |
| 5.39     | -1237.64233 | -1238.10807 | -1238.80395 | -1239.00103 | -1239.02553 | -1239.22693 | -1239.22859 | -1239.41628 | -1239.25869 | -1239.47627 |
| 5.48     | -1237.64051 | -1238.10473 | -1238.80016 | -1238.99732 | -1239.02191 | -1239.22340 | -1239.22500 | -1239.41280 | -1239.25507 | -1239.47280 |
| 5.57     | -1237.63859 | -1238.10147 | -1238.79652 | -1238.99377 | -1239.01844 | -1239.22002 | -1239.22159 | -1239.40951 | -1239.25162 | -1239.46950 |
| 5.67     | -1237.63659 | -1238.09833 | -1238.79307 | -1238.99040 | -1239.01514 | -1239.21679 | -1239.21839 | -1239.40642 | -1239.24836 | -1239.46640 |
| 5.76     | -1237.63455 | -1238.09528 | -1238.78976 | -1238.98718 | -1239.01196 | -1239.21369 | -1239.21534 | -1239.40351 | -1239.24527 | -1239.46346 |
| 5.86     | -1237.63249 | -1238.09235 | -1238.78661 | -1238.98412 | -1239.00894 | -1239.21074 | -1239.21249 | -1239.40079 | -1239.24234 | -1239.46070 |
| 5.95     | -1237.63042 | -1238.08955 | -1238.78362 | -1238.98122 | -1239.00607 | -1239.20794 | -1239.20983 | -1239.39828 | -1239.23960 | -1239.45813 |
| 6.05     | -1237.62838 | -1238.08690 | -1238.78080 | -1238.97850 | -1239.00336 | -1239.20529 | -1239.20736 | -1239.39598 | -1239.23703 | -1239.45575 |
| 6.14     | -1237.62639 | -1238.08438 | -1238.77814 | -1238.97593 | -1239.00079 | -1239.20278 | -1239.20508 | -1239.39389 | -1239.23463 | -1239.45353 |
| 6.24     | -1237.62445 | -1238.08201 | -1238.77562 | -1238.97351 | -1238.99836 | -1239.20040 | -1239.20298 | -1239.39199 | -1239.23239 | -1239.45149 |
| 6.33     | -1237.62260 | -1238.07980 | -1238.77325 | -1238.97124 | -1238.99606 | -1239.19815 | -1239.20106 | -1239.39029 | -1239.23029 | -1239.44959 |
| 6.43     | -1237.62084 | -1238.07773 | -1238.77101 | -1238.96910 | -1238.99389 | -1239.19601 | -1239.19931 | -1239.38876 | -1239.22834 | -1239.44783 |
| 6.52     | -1237.61919 | -1238.07581 | -1238.76888 | -1238.96706 | -1238.99182 | -1239.19398 | -1239.19769 | -1239.38738 | -1239.22650 | -1239.44619 |
| 6.61     | -1237.61767 | -1238.07403 | -1238.76685 | -1238.96513 | -1238.98984 | -1239.19204 | -1239.19620 | -1239.38614 | -1239.22475 | -1239.44463 |
| 6.71     | -1237.61629 | -1238.07239 | -1238.76491 | -1238.96328 | -1238.98795 | -1239.19018 | -1239.19482 | -1239.38499 | -1239.22310 | -1239.44315 |
| 6.80     | -1237.61504 | -1238.07088 | -1238.76306 | -1238.96151 | -1238.98614 | -1239.18840 | -1239.19351 | -1239.38392 | -1239.22152 | -1239.44174 |
| 6.90     | -1237.61393 | -1238.06949 | -1238.76129 | -1238.95982 | -1238.98443 | -1239.18672 | -1239.19229 | -1239.38291 | -1239.22002 | -1239.44040 |
| 6.99     | -1237.61295 | -1238.06820 | -1238.75964 | -1238.95824 | -1238.98282 | -1239.18515 | -1239.19115 | -1239.38196 | -1239.21862 | -1239.43913 |
| 7.09     | -1237.61209 | -1238.06702 | -1238.75810 | -1238.95677 | -1238.98133 | -1239.18370 | -1239.19008 | -1239.38107 | -1239.21733 | -1239.43796 |
| 7.18     | -1237.61134 | -1238.06594 | -1238.75670 | -1238.95542 | -1238.97997 | -1239.18238 | -1239.18910 | -1239.38023 | -1239.21616 | -1239.43688 |
| 7.28     | -1237.61068 | -1238.06495 | -1238.75541 | -1238.95418 | -1238.97874 | -1239.18119 | -1239.18820 | -1239.37944 | -1239.21510 | -1239.43590 |
| 7.37     | -1237.61010 | -1238.06404 | -1238.75424 | -1238.95304 | -1238.97763 | -1239.18010 | -1239.18738 | -1239.37871 | -1239.21415 | -1239.43501 |
| 7.46     | -1237.60959 | -1238.06320 | -1238.75318 | -1238.95201 | -1238.97662 | -1239.17911 | -1239.18663 | -1239.37802 | -1239.21329 | -1239.43420 |
| 7.56     | -1237.60914 | -1238.06244 | -1238.75222 | -1238.95106 | -1238.97571 | -1239.17822 | -1239.18594 | -1239.37739 | -1239.21252 | -1239.43347 |
| 7.65     | -1237.60874 | -1238.06174 | -1238.75134 | -1238.95019 | -1238.97489 | -1239.17741 | -1239.18531 | -1239.37681 | -1239.21184 | -1239.43281 |
| 7.75     | -1237.60837 | -1238.06110 | -1238.75054 | -1238.94940 | -1238.97415 | -1239.17668 | -1239.18474 | -1239.37627 | -1239.21123 | -1239.43222 |
| 7.84     | -1237.60805 | -1238.06051 | -1238.74981 | -1238.94868 | -1238.97348 | -1239.17601 | -1239.18422 | -1239.37578 | -1239.21069 | -1239.43169 |
| 7.94     | -1237.60776 | -1238.05997 | -1238.74914 | -1238.94802 | -1238.97287 | -1239.17541 | -1239.18375 | -1239.37532 | -1239.21021 | -1239.43121 |
| 8.03     | -1237.60750 | -1238.05948 | -1238.74854 | -1238.94741 | -1238.97232 | -1239.17486 | -1239.18333 | -1239.37491 | -1239.20978 | -1239.43079 |
| 8.13     | -1237.60726 | -1238.05902 | -1238.74799 | -1238.94686 | -1238.97183 | -1239.17436 | -1239.18294 | -1239.37453 | -1239.20941 | -1239.43041 |
| 8.22     | -1237.60705 | -1238.05860 | -1238.74748 | -1238.94635 | -1238.97138 | -1239.17391 | -1239.18258 | -1239.37417 | -1239.20907 | -1239.43007 |
| 8.31     | -1237.60685 | -1238.05821 | -1238.74702 | -1238.94588 | -1238.97098 | -1239.17350 | -1239.18226 | -1239.37385 | -1239.20878 | -1239.42977 |
| 8.41     | -1237.60667 | -1238.05785 | -1238.74661 | -1238.94546 | -1238.97061 | -1239.17313 | -1239.18197 | -1239.37356 | -1239.20853 | -1239.42950 |
| 8.50     | -1237.60651 | -1238.05752 | -1238.74623 | -1238.94507 | -1238.97029 | -1239.17280 | -1239.18171 | -1239.37330 | -1239.20831 | -1239.42927 |
| 8.60     | -1237.60637 | -1238.05721 | -1238.74588 | -1238.94472 | -1238.97000 | -1239.17249 | -1239.18148 | -1239.37306 | -1239.20812 | -1239.42906 |
| 8.69     | -1237.60623 | -1238.05693 | -1238.74557 | -1238.94439 | -1238.96974 | -1239.17222 | -1239.18127 | -1239.37284 | -1239.20795 | -1239.42888 |
| 8.79     | -1237.60611 | -1238.05667 | -1238.74528 | -1238.94410 | -1238.96950 | -1239.17197 | -1239.18108 | -1239.37264 | -1239.20781 | -1239.42872 |
| 8.88     | -1237.60600 | -1238.05642 | -1238.74502 | -1238.94383 | -1238.96929 | -1239.17175 | -1239.18091 | -1239.37245 | -1239.20769 | -1239.42858 |
| 8.98     | -1237.60590 | -1238.05620 | -1238.74479 | -1238.94358 | -1238.96910 | -1239.17155 | -1239.18075 | -1239.37229 | -1239.20759 | -1239.42847 |
| 9.07     | -1237.60581 | -1238.05599 | -1238.74458 | -1238.94336 | -1238.96894 | -1239.17137 | -1239.18062 | -1239.37214 | -1239.20751 | -1239.42836 |
| 9.17     | -1237.60572 | -1238.05579 | -1238.74439 | -1238.94315 | -1238.96879 | -1239.17121 | -1239.18050 | -1239.37201 | -1239.20744 | -1239.42828 |
| 9.26     | -1237.60564 | -1238.05561 | -1238.74421 | -1238.94297 | -1238.96866 | -1239.17107 | -1239.18039 | -1239.37189 | -1239.20739 | -1239.42820 |
| 9.35     | -1237.60557 | -1238.05545 | -1238.74406 | -1238.94280 | -1238.96855 | -1239.17094 | -1239.18030 | -1239.37179 | -1239.20734 | -1239.42814 |
| 9.45     | -1237.60551 | -1238.05529 | -1238.74391 | -1238.94265 | -1238.96844 | -1239.17083 | -1239.18021 | -1239.37169 | -1239.20731 | -1239.42808 |
| 9.54     | -1237.60545 | -1238.05515 | -1238.74378 | -1238.94251 | -1238.96835 | -1239.17072 | -1239.18014 | -1239.37160 | -1239.20728 | -1239.42804 |

Table S5: The absolute energies in hartree of the potential energy curve of VSi in the  $^4\Pi$  state with a CASSCF wave function and nom-CPO active space.

| Distance | CASSCF      | CASPT2      | tpbe        | ftpbe       | trevpbe     | ftrevpbe    | tblyp       | ftblyp      | torelyp     | ftorelyp    |
|----------|-------------|-------------|-------------|-------------|-------------|-------------|-------------|-------------|-------------|-------------|
| 9.64     | -1237.60539 | -1238.05501 | -1238.74366 | -1238.94238 | -1238.96827 | -1239.17063 | -1239.18007 | -1239.37152 | -1239.20726 | -1239.42800 |
| 9.73     | -1237.60534 | -1238.05489 | -1238.74356 | -1238.94226 | -1238.96820 | -1239.17055 | -1239.18002 | -1239.37146 | -1239.20725 | -1239.42797 |
| 9.83     | -1237.60529 | -1238.05477 | -1238.74346 | -1238.94216 | -1238.96814 | -1239.17047 | -1239.17997 | -1239.37140 | -1239.20724 | -1239.42795 |
| 9.92     | -1237.60525 | -1238.05466 | -1238.74338 | -1238.94206 | -1238.96809 | -1239.17041 | -1239.17992 | -1239.37134 | -1239.20723 | -1239.42792 |
| 10.02    | -1237.60521 | -1238.05456 | -1238.74330 | -1238.94197 | -1238.96804 | -1239.17035 | -1239.17989 | -1239.37129 | -1239.20723 | -1239.42791 |
| 10.11    | -1237.60517 | -1238.05446 | -1238.74323 | -1238.94190 | -1238.96800 | -1239.17030 | -1239.17986 | -1239.37125 | -1239.20724 | -1239.42789 |
| 10.20    | -1237.60514 | -1238.05437 | -1238.74317 | -1238.94183 | -1238.96797 | -1239.17025 | -1239.17983 | -1239.37122 | -1239.20725 | -1239.42789 |
| 10.30    | -1237.60511 | -1238.05429 | -1238.74311 | -1238.94176 | -1238.96794 | -1239.17021 | -1239.17981 | -1239.37119 | -1239.20725 | -1239.42788 |
| 10.39    | -1237.60508 | -1238.05420 | -1238.74306 | -1238.94170 | -1238.96791 | -1239.17017 | -1239.17979 | -1239.37116 | -1239.20726 | -1239.42787 |
| 10.49    | -1237.60505 | -1238.05413 | -1238.74301 | -1238.94165 | -1238.96789 | -1239.17014 | -1239.17978 | -1239.37113 | -1239.20727 | -1239.42786 |
| 10.58    | -1237.60503 | -1238.05406 | -1238.74296 | -1238.94159 | -1238.96786 | -1239.17011 | -1239.17976 | -1239.37111 | -1239.20728 | -1239.42786 |
| 10.68    | -1237.60500 | -1238.05398 | -1238.74293 | -1238.94155 | -1238.96785 | -1239.17008 | -1239.17975 | -1239.37110 | -1239.20729 | -1239.42785 |
| 10.77    | -1237.60498 | -1238.05392 | -1238.74289 | -1238.94150 | -1238.96783 | -1239.17006 | -1239.17975 | -1239.37108 | -1239.20730 | -1239.42785 |
| 10.87    | -1237.60496 | -1238.05386 | -1238.74286 | -1238.94147 | -1238.96782 | -1239.17004 | -1239.17974 | -1239.37107 | -1239.20731 | -1239.42785 |
| 10.96    | -1237.60494 | -1238.05381 | -1238.74283 | -1238.94143 | -1238.96781 | -1239.17002 | -1239.17974 | -1239.37106 | -1239.20733 | -1239.42785 |
| 11.05    | -1237.60493 | -1238.05304 | -1238.74280 | -1238.94140 | -1238.96780 | -1239.17000 | -1239.17974 | -1239.37105 | -1239.20734 | -1239.42785 |
| 11.15    | -1237.60491 | -1238.05299 | -1238.74278 | -1238.94138 | -1238.96779 | -1239.16999 | -1239.17974 | -1239.37105 | -1239.20735 | -1239.42785 |
| 11.24    | -1237.60489 | -1238.05294 | -1238.74276 | -1238.94135 | -1238.96778 | -1239.16998 | -1239.17974 | -1239.37104 | -1239.20736 | -1239.42785 |
| 11.34    | -1237.60488 | -1238.05290 | -1238.74274 | -1238.94133 | -1238.96778 | -1239.16996 | -1239.17974 | -1239.37104 | -1239.20737 | -1239.42785 |
| 11.43    | -1237.60487 | -1238.05286 | -1238.74272 | -1238.94130 | -1238.96777 | -1239.16995 | -1239.17975 | -1239.37104 | -1239.20738 | -1239.42785 |
| 11.53    | -1237.60485 | -1238.05282 | -1238.74270 | -1238.94128 | -1238.96777 | -1239.16994 | -1239.17975 | -1239.37104 | -1239.20739 | -1239.42785 |
| 11.62    | -1237.60484 | -1238.05278 | -1238.74268 | -1238.94126 | -1238.96776 | -1239.16992 | -1239.17975 | -1239.37103 | -1239.20739 | -1239.42784 |
| 11.72    | -1237.60483 | -1238.05275 | -1238.74267 | -1238.94124 | -1238.96776 | -1239.16992 | -1239.17976 | -1239.37104 | -1239.20740 | -1239.42784 |
| 11.81    | -1237.60482 | -1238.05272 | -1238.74266 | -1238.94122 | -1238.96775 | -1239.16991 | -1239.17977 | -1239.37104 | -1239.20740 | -1239.42784 |
| 11.91    | -1237.60481 | -1238.05269 | -1238.74265 | -1238.94121 | -1238.96775 | -1239.16990 | -1239.17977 | -1239.37104 | -1239.20741 | -1239.42784 |
| 12.00    | -1237.60480 | -1238.05266 | -1238.74264 | -1238.94120 | -1238.96775 | -1239.16989 | -1239.17978 | -1239.37104 | -1239.20742 | -1239.42784 |
| 12.09    | -1237.60479 | -1238.05263 | -1238.74263 | -1238.94119 | -1238.96774 | -1239.16989 | -1239.17978 | -1239.37105 | -1239.20742 | -1239.42784 |
| 12.19    | -1237.60479 | -1238.05261 | -1238.74262 | -1238.94117 | -1238.96774 | -1239.16988 | -1239.17979 | -1239.37105 | -1239.20743 | -1239.42784 |
| 12.28    | -1237.60478 | -1238.05258 | -1238.74261 | -1238.94116 | -1238.96774 | -1239.16988 | -1239.17980 | -1239.37105 | -1239.20743 | -1239.42784 |
| 12.38    | -1237.60477 | -1238.05256 | -1238.74260 | -1238.94115 | -1238.96774 | -1239.16987 | -1239.17980 | -1239.37106 | -1239.20744 | -1239.42784 |
| 12.47    | -1237.60476 | -1238.05254 | -1238.74260 | -1238.94114 | -1238.96774 | -1239.16987 | -1239.17981 | -1239.37106 | -1239.20744 | -1239.42783 |
| 12.57    | -1237.60476 | -1238.05252 | -1238.74260 | -1238.94114 | -1238.96773 | -1239.16986 | -1239.17982 | -1239.37106 | -1239.20744 | -1239.42783 |
| 12.66    | -1237.60475 | -1238.05250 | -1238.74260 | -1238.94113 | -1238.96773 | -1239.16986 | -1239.17982 | -1239.37107 | -1239.20745 | -1239.42783 |
| 12.76    | -1237.60475 | -1238.05248 | -1238.74260 | -1238.94112 | -1238.96773 | -1239.16985 | -1239.17983 | -1239.37107 | -1239.20745 | -1239.42783 |
| 12.85    | -1237.60474 | -1238.05246 | -1238.74260 | -1238.94111 | -1238.96773 | -1239.16985 | -1239.17984 | -1239.37108 | -1239.20745 | -1239.42783 |
| 12.94    | -1237.60474 | -1238.05244 | -1238.74260 | -1238.94111 | -1238.96773 | -1239.16984 | -1239.17984 | -1239.37108 | -1239.20745 | -1239.42782 |
| 13.04    | -1237.60474 | -1238.05243 | -1238.74260 | -1238.94110 | -1238.96773 | -1239.16984 | -1239.17985 | -1239.37108 | -1239.20745 | -1239.42782 |
| 13.13    | -1237.60474 | -1238.05241 | -1238.74260 | -1238.94110 | -1238.96773 | -1239.16984 | -1239.17985 | -1239.37109 | -1239.20745 | -1239.42782 |
| 13.23    | -1237.60474 | -1238.05240 | -1238.74260 | -1238.94109 | -1238.96773 | -1239.16984 | -1239.17986 | -1239.37109 | -1239.20746 | -1239.42782 |
| 13.32    | -1237.60474 | -1238.05238 | -1238.74260 | -1238.94109 | -1238.96773 | -1239.16983 | -1239.17986 | -1239.37110 | -1239.20746 | -1239.42782 |
| 13.42    | -1237.60474 | -1238.05237 | -1238.74260 | -1238.94108 | -1238.96772 | -1239.16983 | -1239.17987 | -1239.37110 | -1239.20746 | -1239.42782 |
| 13.51    | -1237.60474 | -1238.05235 | -1238.74260 | -1238.94108 | -1238.96772 | -1239.16983 | -1239.17987 | -1239.37111 | -1239.20746 | -1239.42782 |
| 13.61    | -1237.60474 | -1238.05234 | -1238.74260 | -1238.94108 | -1238.96772 | -1239.16983 | -1239.17988 | -1239.37111 | -1239.20746 | -1239.42781 |
| 13.70    | -1237.60474 | -1238.05233 | -1238.74260 | -1238.94107 | -1238.96772 | -1239.16982 | -1239.17988 | -1239.37111 | -1239.20746 | -1239.42781 |
| 13.80    | -1237.60474 | -1238.05232 | -1238.74260 | -1238.94107 | -1238.96772 | -1239.16982 | -1239.17989 | -1239.37112 | -1239.20746 | -1239.42781 |
| 13.89    | -1237.60474 | -1238.05231 | -1238.74260 | -1238.94107 | -1238.96772 | -1239.16982 | -1239.17989 | -1239.37112 | -1239.20746 | -1239.42781 |
| 13.98    | -1237.60474 | -1238.05230 | -1238.74260 | -1238.94106 | -1238.96772 | -1239.16982 | -1239.17990 | -1239.37112 | -1239.20746 | -1239.42781 |
| 14.08    | -1237.60474 | -1238.05229 | -1238.74260 | -1238.94106 | -1238.96772 | -1239.16982 | -1239.17990 | -1239.37113 | -1239.20746 | -1239.42781 |
| 14.17    | -1237.60474 | -1238.05228 | -1238.74260 | -1238.94106 | -1238.96772 | -1239.16981 | -1239.17991 | -1239.37113 | -1239.20746 | -1239.42780 |
| 14.27    | -1237.60474 | -1238.05227 | -1238.74260 | -1238.94106 | -1238.96772 | -1239.16981 | -1239.17991 | -1239.37113 | -1239.20746 | -1239.42780 |
| 14.36    | -1237.60474 | -1238.05226 | -1238.74260 | -1238.94106 | -1238.96772 | -1239.16981 | -1239.17991 | -1239.37114 | -1239.20746 | -1239.42780 |
| 14.46    | -1237.60474 | -1238.05225 | -1238.74260 | -1238.94106 | -1238.96772 | -1239.16981 | -1239.17992 | -1239.37114 | -1239.20746 | -1239.42780 |



Table S5: The absolute energies in hartree of the potential energy curve of VSi in the  $^4\Pi$  state with a CASSCF wave function and nom-CPO active space.

| Distance | CASSCF      | CASPT2      | tpbe        | ftpbe       | trevpbe     | ftrevpbe    | tblyp       | ftblyp      | torelyp     | ftorelyp    |
|----------|-------------|-------------|-------------|-------------|-------------|-------------|-------------|-------------|-------------|-------------|
| 14.55    | -1237.60474 | -1238.05224 | -1238.74260 | -1238.94105 | -1238.96772 | -1239.16981 | -1239.17992 | -1239.37114 | -1239.20746 | -1239.42780 |
| 14.65    | -1237.60474 | -1238.05224 | -1238.74260 | -1238.94105 | -1238.96772 | -1239.16981 | -1239.17992 | -1239.37115 | -1239.20746 | -1239.42780 |
| 14.74    | -1237.60474 | -1238.05223 | -1238.74260 | -1238.94105 | -1238.96771 | -1239.16981 | -1239.17993 | -1239.37115 | -1239.20746 | -1239.42780 |
| 14.83    | -1237.60474 | -1238.05222 | -1238.74260 | -1238.94105 | -1238.96772 | -1239.16981 | -1239.17993 | -1239.37115 | -1239.20747 | -1239.42780 |
| 14.93    | -1237.60474 | -1238.05222 | -1238.74260 | -1238.94105 | -1238.96771 | -1239.16981 | -1239.17993 | -1239.37116 | -1239.20747 | -1239.42780 |
| 15.02    | -1237.60474 | -1238.05221 | -1238.74260 | -1238.94105 | -1238.96771 | -1239.16981 | -1239.17994 | -1239.37116 | -1239.20747 | -1239.42780 |
| 15.12    | -1237.60474 | -1238.05221 | -1238.74260 | -1238.94105 | -1238.96771 | -1239.16981 | -1239.17994 | -1239.37116 | -1239.20747 | -1239.42780 |
| 15.21    | -1237.60474 | -1238.05220 | -1238.74260 | -1238.94105 | -1238.96771 | -1239.16980 | -1239.17994 | -1239.37116 | -1239.20747 | -1239.42780 |
| 15.31    | -1237.60474 | -1238.05219 | -1238.74260 | -1238.94105 | -1238.96771 | -1239.16980 | -1239.17994 | -1239.37116 | -1239.20747 | -1239.42780 |
| 15.40    | -1237.60474 | -1238.05216 | -1238.74260 | -1238.94105 | -1238.96771 | -1239.16980 | -1239.17995 | -1239.37117 | -1239.20747 | -1239.42780 |
| 15.50    | -1237.60474 | -1238.05216 | -1238.74260 | -1238.94105 | -1238.96771 | -1239.16980 | -1239.17995 | -1239.37117 | -1239.20747 | -1239.42780 |
| 15.59    | -1237.60474 | -1238.05215 | -1238.74260 | -1238.94105 | -1238.96771 | -1239.16980 | -1239.17995 | -1239.37117 | -1239.20747 | -1239.42780 |
| 15.68    | -1237.60474 | -1238.05217 | -1238.74260 | -1238.94104 | -1238.96771 | -1239.16980 | -1239.17995 | -1239.37117 | -1239.20747 | -1239.42780 |
| 15.78    | -1237.60474 | -1238.05217 | -1238.74260 | -1238.94104 | -1238.96771 | -1239.16980 | -1239.17996 | -1239.37117 | -1239.20747 | -1239.42780 |
| 15.87    | -1237.60474 | -1238.05217 | -1238.74260 | -1238.94104 | -1238.96771 | -1239.16980 | -1239.17996 | -1239.37118 | -1239.20747 | -1239.42780 |
| 15.97    | -1237.60474 | -1238.05216 | -1238.74260 | -1238.94104 | -1238.96771 | -1239.16980 | -1239.17996 | -1239.37118 | -1239.20747 | -1239.42780 |
| 16.06    | -1237.60474 | -1238.05216 | -1238.74260 | -1238.94104 | -1238.96771 | -1239.16980 | -1239.17996 | -1239.37118 | -1239.20747 | -1239.42780 |
| 16.16    | -1237.60474 | -1238.05213 | -1238.74260 | -1238.94104 | -1238.96771 | -1239.16980 | -1239.17996 | -1239.37118 | -1239.20747 | -1239.42780 |
| 16.25    | -1237.60474 | -1238.05212 | -1238.74260 | -1238.94104 | -1238.96771 | -1239.16980 | -1239.17996 | -1239.37118 | -1239.20747 | -1239.42780 |
| 16.35    | -1237.60474 | -1238.05212 | -1238.74260 | -1238.94104 | -1238.96771 | -1239.16980 | -1239.17997 | -1239.37118 | -1239.20747 | -1239.42780 |
| 16.44    | -1237.60474 | -1238.05212 | -1238.74260 | -1238.94104 | -1238.96771 | -1239.16980 | -1239.17997 | -1239.37118 | -1239.20747 | -1239.42780 |
| 16.54    | -1237.60474 | -1238.05211 | -1238.74260 | -1238.94104 | -1238.96771 | -1239.16980 | -1239.17997 | -1239.37118 | -1239.20747 | -1239.42780 |
| 16.63    | -1237.60474 | -1238.05211 | -1238.74260 | -1238.94104 | -1238.96771 | -1239.16980 | -1239.17997 | -1239.37118 | -1239.20747 | -1239.42779 |
| 16.72    | -1237.60474 | -1238.05211 | -1238.74260 | -1238.94104 | -1238.96771 | -1239.16980 | -1239.17997 | -1239.37119 | -1239.20747 | -1239.42779 |
| 16.82    | -1237.60474 | -1238.05210 | -1238.74260 | -1238.94104 | -1238.96771 | -1239.16980 | -1239.17997 | -1239.37119 | -1239.20747 | -1239.42779 |
| 16.91    | -1237.60474 | -1238.05210 | -1238.74260 | -1238.94104 | -1238.96771 | -1239.16980 | -1239.17997 | -1239.37119 | -1239.20747 | -1239.42779 |
| 17.01    | -1237.60474 | -1238.05210 | -1238.74260 | -1238.94104 | -1238.96771 | -1239.16980 | -1239.17997 | -1239.37119 | -1239.20747 | -1239.42779 |
| 17.10    | -1237.60474 | -1238.05209 | -1238.74260 | -1238.94104 | -1238.96771 | -1239.16980 | -1239.17997 | -1239.37119 | -1239.20747 | -1239.42779 |
| 17.20    | -1237.60474 | -1238.05209 | -1238.74260 | -1238.94104 | -1238.96771 | -1239.16980 | -1239.17997 | -1239.37119 | -1239.20747 | -1239.42779 |
| 17.29    | -1237.60474 | -1238.05209 | -1238.74260 | -1238.94104 | -1238.96771 | -1239.16980 | -1239.17998 | -1239.37119 | -1239.20747 | -1239.42779 |
| 17.39    | -1237.60474 | -1238.05209 | -1238.74260 | -1238.94104 | -1238.96771 | -1239.16980 | -1239.17998 | -1239.37119 | -1239.20747 | -1239.42779 |
| 17.48    | -1237.60474 | -1238.05208 | -1238.74260 | -1238.94104 | -1238.96771 | -1239.16980 | -1239.17998 | -1239.37119 | -1239.20747 | -1239.42779 |
| 17.57    | -1237.60474 | -1238.05208 | -1238.74260 | -1238.94104 | -1238.96771 | -1239.16980 | -1239.17998 | -1239.37119 | -1239.20747 | -1239.42779 |
| 17.67    | -1237.60474 | -1238.05208 | -1238.74260 | -1238.94104 | -1238.96771 | -1239.16980 | -1239.17998 | -1239.37119 | -1239.20747 | -1239.42779 |
| 17.76    | -1237.60474 | -1238.05208 | -1238.74260 | -1238.94104 | -1238.96771 | -1239.16980 | -1239.17998 | -1239.37119 | -1239.20747 | -1239.42779 |
| 17.86    | -1237.60474 | -1238.05208 | -1238.74260 | -1238.94104 | -1238.96771 | -1239.16980 | -1239.17998 | -1239.37120 | -1239.20747 | -1239.42779 |
| 17.95    | -1237.60474 | -1238.05207 | -1238.74260 | -1238.94104 | -1238.96771 | -1239.16980 | -1239.17998 | -1239.37120 | -1239.20747 | -1239.42779 |
| 18.05    | -1237.60474 | -1238.05207 | -1238.74260 | -1238.94104 | -1238.96771 | -1239.16980 | -1239.17998 | -1239.37120 | -1239.20747 | -1239.42779 |

Table S6: The absolute energies in hartree of the potential energy curve of VSi in the  $^2\Sigma^+$  state with a CASSCF wave function and nom-CPO active space.

| Distance | CASSCF      | CASPT2      | tpbe        | ftpbe       | trevpbe     | ftrevpbe    | tblyp       | ftblyp      | torelyp     | ftorelyp    |
|----------|-------------|-------------|-------------|-------------|-------------|-------------|-------------|-------------|-------------|-------------|
| 1.98     | -1235.49529 | -1236.01615 | -1236.72563 | -1236.93499 | -1236.93327 | -1237.14354 | -1237.14111 | -1237.34831 | -1237.20454 | -1237.43541 |
| 2.08     | -1235.93159 | -1236.43703 | -1237.16527 | -1237.37080 | -1237.37370 | -1237.58010 | -1237.58032 | -1237.78459 | -1237.63990 | -1237.86694 |
| 2.17     | -1236.27308 | -1236.76397 | -1237.50138 | -1237.70561 | -1237.71080 | -1237.91599 | -1237.91652 | -1238.11988 | -1237.97379 | -1238.19971 |
| 2.27     | -1236.54063 | -1237.01856 | -1237.76407 | -1237.96727 | -1237.97444 | -1238.17874 | -1238.17941 | -1238.38196 | -1238.23483 | -1238.45991 |
| 2.36     | -1236.75126 | -1237.21848 | -1237.97037 | -1238.17265 | -1238.18165 | -1238.38517 | -1238.38605 | -1238.58781 | -1238.43965 | -1238.66405 |
| 2.46     | -1236.91803 | -1237.42319 | -1238.13325 | -1238.33493 | -1238.34539 | -1238.54851 | -1238.54933 | -1238.75061 | -1238.60114 | -1238.82536 |
| 2.55     | -1237.04723 | -1237.55492 | -1238.26352 | -1238.46480 | -1238.47649 | -1238.67934 | -1238.67998 | -1238.88098 | -1238.73039 | -1238.95449 |
| 2.65     | -1237.15901 | -1237.66100 | -1238.36835 | -1238.56947 | -1238.58217 | -1238.78503 | -1238.78508 | -1238.98603 | -1238.83443 | -1239.05874 |

Table S6: The absolute energies in hartree of the potential energy curve of VSi in the  $^2\Sigma^+$  state with a CASSCF wave function and nom-CPO active space.

| Distance | CASSCF      | CASPT2      | tpbe        | ftpbe       | trevpbe     | ftrevpbe    | tblyp       | ftblyp      | torelyp     | ftorelyp    |
|----------|-------------|-------------|-------------|-------------|-------------|-------------|-------------|-------------|-------------|-------------|
| 2.74     | -1237.24683 | -1237.74759 | -1238.45419 | -1238.65516 | -1238.66888 | -1238.87169 | -1238.87110 | -1239.07192 | -1238.91978 | -1239.14412 |
| 2.83     | -1237.31837 | -1237.81907 | -1238.52463 | -1238.72532 | -1238.74039 | -1238.94296 | -1238.94128 | -1239.14191 | -1238.99051 | -1239.21462 |
| 2.93     | -1237.37935 | -1237.87862 | -1238.58512 | -1238.78587 | -1238.80178 | -1239.00440 | -1239.00171 | -1239.20221 | -1239.05095 | -1239.27492 |
| 3.02     | -1237.43021 | -1237.92868 | -1238.63611 | -1238.83684 | -1238.85363 | -1239.05613 | -1239.05265 | -1239.25285 | -1239.10198 | -1239.32554 |
| 3.12     | -1237.47285 | -1237.97041 | -1238.67887 | -1238.87953 | -1238.89723 | -1239.09954 | -1239.09529 | -1239.29502 | -1239.14477 | -1239.36763 |
| 3.21     | -1237.50870 | -1238.00491 | -1238.71426 | -1238.91483 | -1238.93335 | -1239.13542 | -1239.13065 | -1239.32968 | -1239.17994 | -1239.40191 |
| 3.31     | -1237.53870 | -1238.03336 | -1238.74318 | -1238.94363 | -1238.96279 | -1239.16464 | -1239.15972 | -1239.35800 | -1239.20835 | -1239.42952 |
| 3.40     | -1237.56353 | -1238.05668 | -1238.76651 | -1238.96692 | -1238.98650 | -1239.18830 | -1239.18339 | -1239.38115 | -1239.23103 | -1239.45179 |
| 3.50     | -1237.58387 | -1238.07556 | -1238.78514 | -1238.98552 | -1239.00542 | -1239.20723 | -1239.20247 | -1239.39988 | -1239.24897 | -1239.46951 |
| 3.59     | -1237.60035 | -1238.09064 | -1238.79984 | -1239.00017 | -1239.02035 | -1239.22220 | -1239.21769 | -1239.41480 | -1239.26297 | -1239.48337 |
| 3.68     | -1237.61355 | -1238.10249 | -1238.81123 | -1239.01151 | -1239.03192 | -1239.23382 | -1239.22965 | -1239.42647 | -1239.27367 | -1239.49397 |
| 3.78     | -1237.62399 | -1238.11162 | -1238.81983 | -1239.02005 | -1239.04067 | -1239.24265 | -1239.23884 | -1239.43536 | -1239.28157 | -1239.50181 |
| 3.87     | -1237.63215 | -1238.11847 | -1238.82606 | -1239.02623 | -1239.04702 | -1239.24911 | -1239.24566 | -1239.44189 | -1239.28711 | -1239.50733 |
| 3.97     | -1237.63846 | -1238.12340 | -1238.83027 | -1239.03043 | -1239.05133 | -1239.25358 | -1239.25045 | -1239.44639 | -1239.29063 | -1239.51088 |
| 4.06     | -1237.64327 | -1238.12676 | -1238.83277 | -1239.03296 | -1239.05391 | -1239.25641 | -1239.25352 | -1239.44918 | -1239.29244 | -1239.51280 |
| 4.16     | -1237.64692 | -1238.12880 | -1238.83383 | -1239.03410 | -1239.05503 | -1239.25787 | -1239.25511 | -1239.45051 | -1239.29281 | -1239.51337 |
| 4.35     | -1237.65166 | -1238.12977 | -1238.83257 | -1239.03313 | -1239.05389 | -1239.25759 | -1239.25474 | -1239.44973 | -1239.29030 | -1239.51152 |
| 4.44     | -1237.65312 | -1238.12987 | -1238.83040 | -1239.03116 | -1239.05179 | -1239.25600 | -1239.25292 | -1239.44775 | -1239.28760 | -1239.50927 |
| 4.54     | -1237.65417 | -1238.12924 | -1238.82700 | -1239.02797 | -1239.04847 | -1239.25321 | -1239.24979 | -1239.44448 | -1239.28373 | -1239.50593 |
| 4.63     | -1237.65494 | -1238.12788 | -1238.82301 | -1239.02408 | -1239.04457 | -1239.24971 | -1239.24604 | -1239.44049 | -1239.27933 | -1239.50196 |
| 4.72     | -1237.65543 | -1238.12579 | -1238.81960 | -1239.02064 | -1239.04128 | -1239.24658 | -1239.24286 | -1239.43701 | -1239.27568 | -1239.49844 |
| 4.82     | -1237.65558 | -1238.12358 | -1238.81678 | -1239.01776 | -1239.03860 | -1239.24395 | -1239.24028 | -1239.43415 | -1239.27276 | -1239.49553 |
| 4.91     | -1237.65536 | -1238.12143 | -1238.81418 | -1239.01507 | -1239.03614 | -1239.24149 | -1239.23791 | -1239.43152 | -1239.27012 | -1239.49285 |
| 5.01     | -1237.65482 | -1238.11921 | -1238.81162 | -1239.01242 | -1239.03372 | -1239.23905 | -1239.23561 | -1239.42898 | -1239.26759 | -1239.49024 |
| 5.10     | -1237.65397 | -1238.11685 | -1238.80907 | -1239.00979 | -1239.03131 | -1239.23660 | -1239.23333 | -1239.42648 | -1239.26511 | -1239.48767 |
| 5.20     | -1237.65287 | -1238.11436 | -1238.80651 | -1239.00714 | -1239.02889 | -1239.23413 | -1239.23105 | -1239.42400 | -1239.26265 | -1239.48512 |
| 5.29     | -1237.65156 | -1238.11177 | -1238.80395 | -1239.00449 | -1239.02647 | -1239.23163 | -1239.22878 | -1239.42154 | -1239.26022 | -1239.48257 |
| 5.39     | -1237.65006 | -1238.10909 | -1238.80140 | -1239.00183 | -1239.02404 | -1239.22911 | -1239.22652 | -1239.41909 | -1239.25781 | -1239.48004 |
| 5.48     | -1237.64843 | -1238.10636 | -1238.79886 | -1238.99919 | -1239.02162 | -1239.22659 | -1239.22429 | -1239.41668 | -1239.25542 | -1239.47753 |
| 5.57     | -1237.64669 | -1238.10359 | -1238.79635 | -1238.99658 | -1239.01922 | -1239.22409 | -1239.22210 | -1239.41432 | -1239.25308 | -1239.47506 |
| 5.67     | -1237.64487 | -1238.10081 | -1238.79388 | -1238.99401 | -1239.01686 | -1239.22161 | -1239.21996 | -1239.41201 | -1239.25079 | -1239.47265 |
| 5.76     | -1237.64300 | -1238.09803 | -1238.79146 | -1238.99149 | -1239.01454 | -1239.21917 | -1239.21788 | -1239.40978 | -1239.24856 | -1239.47029 |
| 5.86     | -1237.64110 | -1238.09528 | -1238.78910 | -1238.98902 | -1239.01227 | -1239.21678 | -1239.21586 | -1239.40762 | -1239.24639 | -1239.46800 |
| 5.95     | -1237.63919 | -1238.09257 | -1238.78680 | -1238.98663 | -1239.01006 | -1239.21444 | -1239.21392 | -1239.40556 | -1239.24430 | -1239.46579 |
| 6.05     | -1237.63729 | -1238.08993 | -1238.78457 | -1238.98431 | -1239.00792 | -1239.21217 | -1239.21207 | -1239.40359 | -1239.24228 | -1239.46367 |
| 6.14     | -1237.63542 | -1238.08735 | -1238.78241 | -1238.98208 | -1239.00584 | -1239.20998 | -1239.21030 | -1239.40174 | -1239.24033 | -1239.46164 |
| 6.24     | -1237.63360 | -1238.08483 | -1238.78032 | -1238.97993 | -1239.00382 | -1239.20785 | -1239.20862 | -1239.39999 | -1239.23847 | -1239.45970 |
| 6.33     | -1237.63184 | -1238.08241 | -1238.77830 | -1238.97786 | -1239.00187 | -1239.20581 | -1239.20703 | -1239.39836 | -1239.23668 | -1239.45786 |
| 6.43     | -1237.63015 | -1238.08008 | -1238.77635 | -1238.97587 | -1238.99998 | -1239.20384 | -1239.20552 | -1239.39683 | -1239.23496 | -1239.45612 |
| 6.52     | -1237.62855 | -1238.07786 | -1238.77447 | -1238.97397 | -1238.99816 | -1239.20194 | -1239.20408 | -1239.39540 | -1239.23332 | -1239.45446 |
| 6.61     | -1237.62703 | -1238.07575 | -1238.77264 | -1238.97213 | -1238.99639 | -1239.20012 | -1239.20271 | -1239.39407 | -1239.23174 | -1239.45289 |
| 6.71     | -1237.62560 | -1238.07375 | -1238.77087 | -1238.97036 | -1238.99468 | -1239.19835 | -1239.20141 | -1239.39282 | -1239.23022 | -1239.45139 |
| 6.80     | -1237.62428 | -1238.07188 | -1238.76915 | -1238.96865 | -1238.99301 | -1239.19665 | -1239.20015 | -1239.39164 | -1239.22875 | -1239.44995 |
| 6.90     | -1237.62305 | -1238.07012 | -1238.76748 | -1238.96700 | -1238.99140 | -1239.19501 | -1239.19894 | -1239.39052 | -1239.22734 | -1239.44858 |
| 6.99     | -1237.62192 | -1238.06849 | -1238.76587 | -1238.96541 | -1238.98984 | -1239.19344 | -1239.19778 | -1239.38945 | -1239.22598 | -1239.44726 |
| 7.09     | -1237.62088 | -1238.06697 | -1238.76432 | -1238.96389 | -1238.98834 | -1239.19193 | -1239.19666 | -1239.38844 | -1239.22468 | -1239.44601 |
| 7.18     | -1237.61993 | -1238.06556 | -1238.76283 | -1238.96242 | -1238.98690 | -1239.19048 | -1239.19559 | -1239.38748 | -1239.22344 | -1239.44481 |
| 7.28     | -1237.61906 | -1238.06426 | -1238.76140 | -1238.96103 | -1238.98554 | -1239.18911 | -1239.19456 | -1239.38656 | -1239.22227 | -1239.44367 |
| 7.37     | -1237.61828 | -1238.06306 | -1238.76005 | -1238.95970 | -1238.98424 | -1239.18780 | -1239.19358 | -1239.38568 | -1239.22116 | -1239.44260 |
| 7.46     | -1237.61756 | -1238.06195 | -1238.75876 | -1238.95844 | -1238.98301 | -1239.18657 | -1239.19265 | -1239.38485 | -1239.22013 | -1239.44159 |
| 7.56     | -1237.61692 | -1238.06094 | -1238.75756 | -1238.95725 | -1238.98186 | -1239.18542 | -1239.19178 | -1239.38407 | -1239.21916 | -1239.44064 |
| 7.65     | -1237.61633 | -1238.06002 | -1238.75642 | -1238.95614 | -1238.98079 | -1239.18434 | -1239.19095 | -1239.38333 | -1239.21827 | -1239.43976 |

Table S6: The absolute energies in hartree of the potential energy curve of VSi in the  $^2\Sigma^+$  state with a CASSCF wave function and nom-CPO active space.

| Distance | CASSCF      | CASPT2      | tpbe        | ftpbe       | trevpbe     | ftrevpbe    | tblyp       | ftblyp      | torelyp     | ftorelyp    |
|----------|-------------|-------------|-------------|-------------|-------------|-------------|-------------|-------------|-------------|-------------|
| 7.75     | -1237.61580 | -1238.05917 | -1238.75537 | -1238.95510 | -1238.97980 | -1239.18334 | -1239.19018 | -1239.38265 | -1239.21745 | -1239.43894 |
| 7.84     | -1237.61532 | -1238.05839 | -1238.75439 | -1238.95414 | -1238.97888 | -1239.18242 | -1239.18947 | -1239.38201 | -1239.21670 | -1239.43820 |
| 7.94     | -1237.61489 | -1238.05768 | -1238.75348 | -1238.95325 | -1238.97804 | -1239.18157 | -1239.18880 | -1239.38142 | -1239.21602 | -1239.43751 |
| 8.03     | -1237.61450 | -1238.05703 | -1238.75265 | -1238.95242 | -1238.97726 | -1239.18078 | -1239.18819 | -1239.38087 | -1239.21540 | -1239.43689 |
| 8.13     | -1237.61415 | -1238.05643 | -1238.75188 | -1238.95166 | -1238.97655 | -1239.18007 | -1239.18762 | -1239.38037 | -1239.21484 | -1239.43632 |
| 8.22     | -1237.61383 | -1238.05589 | -1238.75117 | -1238.95096 | -1238.97590 | -1239.17941 | -1239.18711 | -1239.37991 | -1239.21434 | -1239.43581 |
| 8.31     | -1237.61354 | -1238.05539 | -1238.75053 | -1238.95032 | -1238.97532 | -1239.17882 | -1239.18664 | -1239.37949 | -1239.21390 | -1239.43536 |
| 8.41     | -1237.61327 | -1238.05493 | -1238.74994 | -1238.94974 | -1238.97479 | -1239.17828 | -1239.18621 | -1239.37911 | -1239.21351 | -1239.43495 |
| 8.50     | -1237.61304 | -1238.05451 | -1238.74940 | -1238.94920 | -1238.97431 | -1239.17779 | -1239.18582 | -1239.37876 | -1239.21316 | -1239.43459 |
| 8.60     | -1237.61282 | -1238.05413 | -1238.74892 | -1238.94872 | -1238.97388 | -1239.17735 | -1239.18547 | -1239.37844 | -1239.21285 | -1239.43426 |
| 8.69     | -1237.61263 | -1238.05378 | -1238.74847 | -1238.94828 | -1238.97350 | -1239.17695 | -1239.18515 | -1239.37815 | -1239.21258 | -1239.43398 |
| 8.79     | -1237.61245 | -1238.05346 | -1238.74807 | -1238.94787 | -1238.97315 | -1239.17660 | -1239.18486 | -1239.37788 | -1239.21235 | -1239.43372 |
| 8.88     | -1237.61229 | -1238.05317 | -1238.74771 | -1238.94751 | -1238.97284 | -1239.17627 | -1239.18460 | -1239.37764 | -1239.21214 | -1239.43350 |
| 8.98     | -1237.61214 | -1238.05290 | -1238.74738 | -1238.94718 | -1238.97256 | -1239.17599 | -1239.18437 | -1239.37741 | -1239.21197 | -1239.43331 |
| 9.07     | -1237.61201 | -1238.05265 | -1238.74709 | -1238.94688 | -1238.97232 | -1239.17573 | -1239.18416 | -1239.37720 | -1239.21182 | -1239.43315 |
| 9.17     | -1237.61189 | -1238.05243 | -1238.74682 | -1238.94661 | -1238.97210 | -1239.17550 | -1239.18398 | -1239.37702 | -1239.21169 | -1239.43300 |
| 9.26     | -1237.61178 | -1238.05222 | -1238.74658 | -1238.94637 | -1238.97190 | -1239.17530 | -1239.18382 | -1239.37687 | -1239.21159 | -1239.43288 |
| 9.35     | -1237.61168 | -1238.05203 | -1238.74637 | -1238.94615 | -1238.97173 | -1239.17512 | -1239.18367 | -1239.37673 | -1239.21150 | -1239.43278 |
| 9.45     | -1237.61159 | -1238.05185 | -1238.74617 | -1238.94595 | -1238.97158 | -1239.17495 | -1239.18354 | -1239.37661 | -1239.21142 | -1239.43269 |
| 9.54     | -1237.61150 | -1238.05169 | -1238.74599 | -1238.94577 | -1238.97144 | -1239.17481 | -1239.18343 | -1239.37650 | -1239.21136 | -1239.43261 |
| 9.64     | -1237.61142 | -1238.05154 | -1238.74583 | -1238.94561 | -1238.97132 | -1239.17468 | -1239.18332 | -1239.37640 | -1239.21131 | -1239.43254 |
| 9.73     | -1237.61135 | -1238.05141 | -1238.74569 | -1238.94546 | -1238.97121 | -1239.17456 | -1239.18323 | -1239.37631 | -1239.21126 | -1239.43249 |
| 9.83     | -1237.61129 | -1238.05128 | -1238.74556 | -1238.94532 | -1238.97112 | -1239.17446 | -1239.18315 | -1239.37623 | -1239.21123 | -1239.43244 |
| 9.92     | -1237.61123 | -1238.05117 | -1238.74544 | -1238.94520 | -1238.97104 | -1239.17437 | -1239.18308 | -1239.37617 | -1239.21121 | -1239.43240 |
| 10.02    | -1237.61118 | -1238.05106 | -1238.74534 | -1238.94509 | -1238.97097 | -1239.17429 | -1239.18302 | -1239.37611 | -1239.21119 | -1239.43237 |
| 10.11    | -1237.61113 | -1238.05097 | -1238.74524 | -1238.94499 | -1238.97090 | -1239.17422 | -1239.18297 | -1239.37606 | -1239.21117 | -1239.43235 |
| 10.20    | -1237.61108 | -1238.05089 | -1238.74516 | -1238.94490 | -1238.97085 | -1239.17415 | -1239.18292 | -1239.37601 | -1239.21116 | -1239.43232 |
| 10.30    | -1237.61104 | -1238.05081 | -1238.74508 | -1238.94482 | -1238.97080 | -1239.17410 | -1239.18288 | -1239.37597 | -1239.21116 | -1239.43230 |
| 10.39    | -1237.61100 | -1238.05075 | -1238.74501 | -1238.94475 | -1238.97075 | -1239.17404 | -1239.18285 | -1239.37593 | -1239.21115 | -1239.43229 |
| 10.49    | -1237.61097 | -1238.05070 | -1238.74494 | -1238.94468 | -1238.97071 | -1239.17400 | -1239.18282 | -1239.37590 | -1239.21115 | -1239.43228 |
| 10.58    | -1237.61094 | -1238.05065 | -1238.74488 | -1238.94462 | -1238.97068 | -1239.17395 | -1239.18279 | -1239.37587 | -1239.21115 | -1239.43227 |
| 10.68    | -1237.61091 | -1238.05062 | -1238.74483 | -1238.94456 | -1238.97065 | -1239.17392 | -1239.18277 | -1239.37585 | -1239.21115 | -1239.43226 |
| 10.77    | -1237.61088 | -1238.05060 | -1238.74479 | -1238.94451 | -1238.97062 | -1239.17389 | -1239.18276 | -1239.37583 | -1239.21116 | -1239.43225 |
| 10.87    | -1237.61085 | -1238.05059 | -1238.74474 | -1238.94446 | -1238.97060 | -1239.17386 | -1239.18274 | -1239.37581 | -1239.21116 | -1239.43225 |
| 10.96    | -1237.61083 | -1238.05059 | -1238.74471 | -1238.94442 | -1238.97058 | -1239.17383 | -1239.18273 | -1239.37580 | -1239.21116 | -1239.43225 |
| 11.05    | -1237.61081 | -1238.05061 | -1238.74467 | -1238.94439 | -1238.97056 | -1239.17381 | -1239.18272 | -1239.37579 | -1239.21117 | -1239.43225 |
| 11.15    | -1237.61079 | -1238.05063 | -1238.74464 | -1238.94435 | -1238.97055 | -1239.17379 | -1239.18271 | -1239.37578 | -1239.21118 | -1239.43224 |
| 11.24    | -1237.61077 | -1238.05067 | -1238.74461 | -1238.94432 | -1238.97053 | -1239.17377 | -1239.18271 | -1239.37578 | -1239.21118 | -1239.43224 |
| 11.34    | -1237.61075 | -1238.05071 | -1238.74458 | -1238.94429 | -1238.97052 | -1239.17375 | -1239.18270 | -1239.37577 | -1239.21119 | -1239.43224 |
| 11.43    | -1237.61073 | -1238.05073 | -1238.74456 | -1238.94426 | -1238.97051 | -1239.17374 | -1239.18270 | -1239.37576 | -1239.21119 | -1239.43224 |
| 11.53    | -1237.61072 | -1238.05073 | -1238.74453 | -1238.94423 | -1238.97050 | -1239.17372 | -1239.18269 | -1239.37575 | -1239.21119 | -1239.43223 |
| 11.62    | -1237.61071 | -1238.05072 | -1238.74451 | -1238.94421 | -1238.97049 | -1239.17371 | -1239.18270 | -1239.37575 | -1239.21120 | -1239.43223 |
| 11.72    | -1237.61069 | -1238.05067 | -1238.74450 | -1238.94419 | -1238.97048 | -1239.17370 | -1239.18270 | -1239.37576 | -1239.21121 | -1239.43224 |
| 11.81    | -1237.61068 | -1238.05059 | -1238.74448 | -1238.94417 | -1238.97048 | -1239.17369 | -1239.18270 | -1239.37576 | -1239.21122 | -1239.43224 |
| 11.91    | -1237.61067 | -1238.05044 | -1238.74446 | -1238.94415 | -1238.97047 | -1239.17367 | -1239.18270 | -1239.37575 | -1239.21122 | -1239.43223 |
| 12.00    | -1237.61066 | -1238.05025 | -1238.74445 | -1238.94414 | -1238.97046 | -1239.17366 | -1239.18270 | -1239.37575 | -1239.21122 | -1239.43223 |
| 12.09    | -1237.61065 | -1238.05003 | -1238.74443 | -1238.94412 | -1238.97046 | -1239.17366 | -1239.18271 | -1239.37576 | -1239.21123 | -1239.43223 |
| 12.19    | -1237.61064 | -1238.04983 | -1238.74442 | -1238.94411 | -1238.97045 | -1239.17365 | -1239.18271 | -1239.37576 | -1239.21123 | -1239.43223 |
| 12.28    | -1237.61063 | -1238.04967 | -1238.74441 | -1238.94410 | -1238.97045 | -1239.17364 | -1239.18271 | -1239.37576 | -1239.21123 | -1239.43223 |
| 12.38    | -1237.61062 | -1238.04954 | -1238.74440 | -1238.94408 | -1238.97044 | -1239.17364 | -1239.18272 | -1239.37576 | -1239.21124 | -1239.43223 |
| 12.47    | -1237.61061 | -1238.04944 | -1238.74439 | -1238.94407 | -1238.97044 | -1239.17363 | -1239.18272 | -1239.37577 | -1239.21124 | -1239.43223 |
| 12.57    | -1237.61061 | -1238.04937 | -1238.74438 | -1238.94406 | -1238.97044 | -1239.17362 | -1239.18273 | -1239.37577 | -1239.21124 | -1239.43222 |

Table S6: The absolute energies in hartree of the potential energy curve of VSi in the  $^2\Sigma^+$  state with a CASSCF wave function and nom-CPO active space.

| Distance | CASSCF      | CASPT2      | tpbe        | ftpbe       | trevpbe     | ftrevpbe    | tblyp       | ftblyp      | torelyp     | ftorelyp    |
|----------|-------------|-------------|-------------|-------------|-------------|-------------|-------------|-------------|-------------|-------------|
| 12.66    | -1237.61060 | -1238.04930 | -1238.74437 | -1238.94405 | -1238.97043 | -1239.17362 | -1239.18273 | -1239.37577 | -1239.21124 | -1239.43222 |
| 12.76    | -1237.61059 | -1238.04926 | -1238.74436 | -1238.94404 | -1238.97043 | -1239.17361 | -1239.18274 | -1239.37577 | -1239.21124 | -1239.43222 |
| 12.85    | -1237.61059 | -1238.04921 | -1238.74435 | -1238.94403 | -1238.97043 | -1239.17361 | -1239.18274 | -1239.37578 | -1239.21124 | -1239.43222 |
| 12.94    | -1237.61058 | -1238.04918 | -1238.74435 | -1238.94403 | -1238.97042 | -1239.17360 | -1239.18275 | -1239.37578 | -1239.21125 | -1239.43222 |
| 13.04    | -1237.61058 | -1238.04915 | -1238.74434 | -1238.94402 | -1238.97042 | -1239.17360 | -1239.18275 | -1239.37579 | -1239.21125 | -1239.43222 |
| 13.13    | -1237.61057 | -1238.04913 | -1238.74434 | -1238.94402 | -1238.97042 | -1239.17360 | -1239.18276 | -1239.37579 | -1239.21125 | -1239.43222 |
| 13.23    | -1237.61056 | -1238.04911 | -1238.74433 | -1238.94401 | -1238.97042 | -1239.17360 | -1239.18276 | -1239.37580 | -1239.21125 | -1239.43222 |
| 13.32    | -1237.61056 | -1238.04909 | -1238.74433 | -1238.94401 | -1238.97042 | -1239.17359 | -1239.18277 | -1239.37580 | -1239.21125 | -1239.43222 |
| 13.42    | -1237.61056 | -1238.04907 | -1238.74432 | -1238.94400 | -1238.97041 | -1239.17359 | -1239.18277 | -1239.37581 | -1239.21125 | -1239.43222 |
| 13.51    | -1237.61055 | -1238.04847 | -1238.74432 | -1238.94400 | -1238.97041 | -1239.17359 | -1239.18278 | -1239.37581 | -1239.21125 | -1239.43222 |
| 13.61    | -1237.61055 | -1238.04845 | -1238.74431 | -1238.94399 | -1238.97041 | -1239.17358 | -1239.18278 | -1239.37581 | -1239.21125 | -1239.43222 |
| 13.70    | -1237.61054 | -1238.04843 | -1238.74431 | -1238.94399 | -1238.97041 | -1239.17358 | -1239.18278 | -1239.37581 | -1239.21125 | -1239.43221 |
| 13.80    | -1237.61054 | -1238.04842 | -1238.74431 | -1238.94398 | -1238.97041 | -1239.17358 | -1239.18279 | -1239.37582 | -1239.21125 | -1239.43221 |
| 13.89    | -1237.61054 | -1238.04841 | -1238.74430 | -1238.94398 | -1238.97040 | -1239.17358 | -1239.18279 | -1239.37582 | -1239.21125 | -1239.43221 |
| 13.98    | -1237.61053 | -1238.04839 | -1238.74430 | -1238.94397 | -1238.97040 | -1239.17358 | -1239.18279 | -1239.37582 | -1239.21125 | -1239.43221 |
| 14.08    | -1237.61053 | -1238.04838 | -1238.74430 | -1238.94397 | -1238.97040 | -1239.17358 | -1239.18280 | -1239.37582 | -1239.21125 | -1239.43221 |
| 14.17    | -1237.61053 | -1238.04837 | -1238.74429 | -1238.94397 | -1238.97040 | -1239.17358 | -1239.18280 | -1239.37583 | -1239.21125 | -1239.43221 |
| 14.27    | -1237.61052 | -1238.04836 | -1238.74429 | -1238.94397 | -1238.97040 | -1239.17358 | -1239.18280 | -1239.37583 | -1239.21125 | -1239.43221 |
| 14.36    | -1237.61052 | -1238.04835 | -1238.74429 | -1238.94396 | -1238.97040 | -1239.17358 | -1239.18281 | -1239.37583 | -1239.21125 | -1239.43221 |
| 14.46    | -1237.61052 | -1238.04834 | -1238.74429 | -1238.94396 | -1238.97039 | -1239.17358 | -1239.18281 | -1239.37584 | -1239.21125 | -1239.43221 |
| 14.55    | -1237.61051 | -1238.04834 | -1238.74429 | -1238.94396 | -1238.97039 | -1239.17358 | -1239.18281 | -1239.37584 | -1239.21125 | -1239.43221 |
| 14.65    | -1237.61051 | -1238.04833 | -1238.74428 | -1238.94396 | -1238.97039 | -1239.17358 | -1239.18282 | -1239.37584 | -1239.21126 | -1239.43221 |
| 14.74    | -1237.61051 | -1238.04832 | -1238.74428 | -1238.94396 | -1238.97039 | -1239.17358 | -1239.18282 | -1239.37585 | -1239.21126 | -1239.43221 |
| 14.83    | -1237.61051 | -1238.04831 | -1238.74428 | -1238.94396 | -1238.97039 | -1239.17358 | -1239.18282 | -1239.37585 | -1239.21126 | -1239.43221 |
| 14.93    | -1237.61050 | -1238.04831 | -1238.74428 | -1238.94395 | -1238.97039 | -1239.17358 | -1239.18282 | -1239.37585 | -1239.21125 | -1239.43221 |
| 15.02    | -1237.61050 | -1238.04830 | -1238.74428 | -1238.94395 | -1238.97039 | -1239.17358 | -1239.18283 | -1239.37585 | -1239.21125 | -1239.43221 |
| 15.12    | -1237.61050 | -1238.04829 | -1238.74427 | -1238.94395 | -1238.97039 | -1239.17358 | -1239.18283 | -1239.37586 | -1239.21125 | -1239.43221 |
| 15.21    | -1237.61050 | -1238.04829 | -1238.74427 | -1238.94395 | -1238.97038 | -1239.17358 | -1239.18283 | -1239.37586 | -1239.21125 | -1239.43221 |
| 15.31    | -1237.61050 | -1238.04827 | -1238.74427 | -1238.94395 | -1238.97038 | -1239.17358 | -1239.18283 | -1239.37586 | -1239.21125 | -1239.43220 |
| 15.40    | -1237.61049 | -1238.04826 | -1238.74427 | -1238.94395 | -1238.97038 | -1239.17358 | -1239.18283 | -1239.37586 | -1239.21125 | -1239.43220 |
| 15.50    | -1237.61049 | -1238.04826 | -1238.74427 | -1238.94395 | -1238.97038 | -1239.17358 | -1239.18284 | -1239.37587 | -1239.21125 | -1239.43221 |
| 15.59    | -1237.61049 | -1238.04825 | -1238.74427 | -1238.94395 | -1238.97038 | -1239.17358 | -1239.18284 | -1239.37587 | -1239.21126 | -1239.43221 |
| 15.68    | -1237.61049 | -1238.04825 | -1238.74427 | -1238.94395 | -1238.97038 | -1239.17358 | -1239.18284 | -1239.37587 | -1239.21126 | -1239.43221 |
| 15.78    | -1237.61049 | -1238.04824 | -1238.74427 | -1238.94394 | -1238.97038 | -1239.17358 | -1239.18285 | -1239.37587 | -1239.21126 | -1239.43221 |
| 15.87    | -1237.61049 | -1238.04824 | -1238.74427 | -1238.94394 | -1238.97038 | -1239.17358 | -1239.18285 | -1239.37587 | -1239.21126 | -1239.43221 |
| 15.97    | -1237.61048 | -1238.04821 | -1238.74427 | -1238.94394 | -1238.97038 | -1239.17358 | -1239.18285 | -1239.37588 | -1239.21126 | -1239.43221 |
| 16.06    | -1237.61048 | -1238.04821 | -1238.74427 | -1238.94394 | -1238.97038 | -1239.17358 | -1239.18285 | -1239.37588 | -1239.21126 | -1239.43221 |
| 16.16    | -1237.61048 | -1238.04821 | -1238.74427 | -1238.94394 | -1238.97038 | -1239.17358 | -1239.18285 | -1239.37588 | -1239.21126 | -1239.43221 |
| 16.25    | -1237.61048 | -1238.04821 | -1238.74426 | -1238.94394 | -1238.97038 | -1239.17358 | -1239.18285 | -1239.37588 | -1239.21126 | -1239.43221 |
| 16.35    | -1237.61048 | -1238.04821 | -1238.74426 | -1238.94394 | -1238.97038 | -1239.17358 | -1239.18285 | -1239.37588 | -1239.21126 | -1239.43221 |
| 16.44    | -1237.61048 | -1238.04821 | -1238.74426 | -1238.94394 | -1238.97038 | -1239.17358 | -1239.18286 | -1239.37588 | -1239.21126 | -1239.43221 |
| 16.54    | -1237.61048 | -1238.04821 | -1238.74426 | -1238.94394 | -1238.97038 | -1239.17358 | -1239.18286 | -1239.37588 | -1239.21125 | -1239.43221 |
| 16.63    | -1237.61047 | -1238.04821 | -1238.74426 | -1238.94394 | -1238.97038 | -1239.17358 | -1239.18286 | -1239.37588 | -1239.21125 | -1239.43221 |
| 16.72    | -1237.61047 | -1238.04821 | -1238.74426 | -1238.94394 | -1238.97038 | -1239.17358 | -1239.18286 | -1239.37588 | -1239.21125 | -1239.43221 |
| 16.82    | -1237.61047 | -1238.04821 | -1238.74426 | -1238.94394 | -1238.97037 | -1239.17358 | -1239.18286 | -1239.37589 | -1239.21125 | -1239.43221 |
| 16.91    | -1237.61047 | -1238.04821 | -1238.74426 | -1238.94394 | -1238.97037 | -1239.17358 | -1239.18286 | -1239.37589 | -1239.21125 | -1239.43221 |
| 17.01    | -1237.61047 | -1238.04821 | -1238.74426 | -1238.94394 | -1238.97037 | -1239.17358 | -1239.18286 | -1239.37589 | -1239.21125 | -1239.43221 |
| 17.10    | -1237.61047 | -1238.04821 | -1238.74426 | -1238.94394 | -1238.97037 | -1239.17358 | -1239.18286 | -1239.37589 | -1239.21125 | -1239.43221 |
| 17.20    | -1237.61047 | -1238.04821 | -1238.74426 | -1238.94394 | -1238.97037 | -1239.17358 | -1239.18286 | -1239.37589 | -1239.21125 | -1239.43221 |
| 17.29    | -1237.61047 | -1238.04821 | -1238.74426 | -1238.94394 | -1238.97037 | -1239.17358 | -1239.18286 | -1239.37589 | -1239.21125 | -1239.43221 |
| 17.39    | -1237.61047 | -1238.04821 | -1238.74426 | -1238.94394 | -1238.97037 | -1239.17358 | -1239.18286 | -1239.37589 | -1239.21125 | -1239.43221 |
| 17.48    | -1237.61046 | -1238.04821 | -1238.74426 | -1238.94394 | -1238.97037 | -1239.17358 | -1239.18286 | -1239.37589 | -1239.21125 | -1239.43221 |

Table S6: The absolute energies in hartree of the potential energy curve of VSi in the  $^2\Sigma^+$  state with a CASSCF wave function and nom-CPO active space.

| Distance | CASSCF      | CASPT2      | tpbe        | ftpbe       | trevpbe     | ftrevpbe    | tblyp       | ftblyp      | torelyp     | ftorelyp    |
|----------|-------------|-------------|-------------|-------------|-------------|-------------|-------------|-------------|-------------|-------------|
| 17.57    | -1237.61046 | -1238.04821 | -1238.74426 | -1238.94394 | -1238.97037 | -1239.17358 | -1239.18287 | -1239.37589 | -1239.21125 | -1239.43221 |
| 17.67    | -1237.61046 | -1238.04821 | -1238.74426 | -1238.94394 | -1238.97037 | -1239.17358 | -1239.18287 | -1239.37589 | -1239.21125 | -1239.43221 |
| 17.76    | -1237.61046 | -1238.04821 | -1238.74426 | -1238.94394 | -1238.97037 | -1239.17358 | -1239.18287 | -1239.37590 | -1239.21125 | -1239.43221 |
| 17.86    | -1237.61046 | -1238.04821 | -1238.74426 | -1238.94394 | -1238.97037 | -1239.17358 | -1239.18287 | -1239.37590 | -1239.21125 | -1239.43221 |
| 17.95    | -1237.61046 | -1238.04821 | -1238.74426 | -1238.94393 | -1238.97037 | -1239.17358 | -1239.18287 | -1239.37590 | -1239.21125 | -1239.43221 |
| 18.05    | -1237.61046 | -1238.04821 | -1238.74426 | -1238.94393 | -1238.97037 | -1239.17358 | -1239.18287 | -1239.37590 | -1239.21125 | -1239.43221 |

Table S7: The absolute energies in hartree of the potential energy curve of VSi in the  $^2\Delta$  state with a CASSCF wave function and nom-CPO active space.

| Distance | CASSCF      | CASPT2      | tpbe        | ftpbe       | trevpbe     | ftrevpbe    | tblyp       | ftblyp      | torelyp     | ftorelyp    |
|----------|-------------|-------------|-------------|-------------|-------------|-------------|-------------|-------------|-------------|-------------|
| 1.98     | -1235.49529 | -1236.01615 | -1236.72563 | -1236.93499 | -1236.93327 | -1237.14354 | -1237.14111 | -1237.34831 | -1237.20454 | -1237.43541 |
| 2.08     | -1235.93159 | -1236.43703 | -1237.16527 | -1237.37080 | -1237.37370 | -1237.58010 | -1237.58032 | -1237.78459 | -1237.63990 | -1237.86694 |
| 2.17     | -1236.27308 | -1236.76397 | -1237.50138 | -1237.70561 | -1237.71080 | -1237.91599 | -1237.91652 | -1238.11988 | -1237.97379 | -1238.19971 |
| 2.27     | -1236.54063 | -1237.01856 | -1237.76407 | -1237.96727 | -1237.97444 | -1238.17874 | -1238.17941 | -1238.38196 | -1238.23483 | -1238.45991 |
| 2.36     | -1236.75126 | -1237.21848 | -1237.97037 | -1238.17265 | -1238.18165 | -1238.38517 | -1238.38605 | -1238.58781 | -1238.43965 | -1238.66405 |
| 2.46     | -1236.91803 | -1237.42319 | -1238.13325 | -1238.33493 | -1238.34539 | -1238.54851 | -1238.54933 | -1238.75061 | -1238.60114 | -1238.82536 |
| 2.55     | -1237.04723 | -1237.55492 | -1238.26352 | -1238.46480 | -1238.47649 | -1238.67934 | -1238.67998 | -1238.88098 | -1238.73039 | -1238.95449 |
| 2.65     | -1237.15901 | -1237.66100 | -1238.36835 | -1238.56947 | -1238.58217 | -1238.78503 | -1238.78508 | -1238.98603 | -1238.83443 | -1239.05874 |
| 2.74     | -1237.24683 | -1237.74759 | -1238.45419 | -1238.65516 | -1238.66888 | -1238.87169 | -1238.87110 | -1239.07192 | -1238.91978 | -1239.14412 |
| 2.83     | -1237.31837 | -1237.81907 | -1238.52463 | -1238.72532 | -1238.74039 | -1238.94296 | -1238.94128 | -1239.14191 | -1238.99051 | -1239.21462 |
| 2.93     | -1237.37935 | -1237.87862 | -1238.58512 | -1238.78587 | -1238.80178 | -1239.00440 | -1239.00171 | -1239.20221 | -1239.05095 | -1239.27492 |
| 3.02     | -1237.43021 | -1237.92868 | -1238.63611 | -1238.83684 | -1238.85363 | -1239.05613 | -1239.05265 | -1239.25285 | -1239.10198 | -1239.32554 |
| 3.12     | -1237.47285 | -1237.97041 | -1238.67887 | -1238.87953 | -1238.89723 | -1239.09954 | -1239.09529 | -1239.29502 | -1239.14477 | -1239.36763 |
| 3.21     | -1237.50870 | -1238.00491 | -1238.71426 | -1238.91483 | -1238.93335 | -1239.13542 | -1239.13065 | -1239.32968 | -1239.17994 | -1239.40191 |
| 3.31     | -1237.53870 | -1238.03336 | -1238.74318 | -1238.94363 | -1238.96279 | -1239.16464 | -1239.15972 | -1239.35800 | -1239.20835 | -1239.42952 |
| 3.40     | -1237.56353 | -1238.05668 | -1238.76651 | -1238.96692 | -1238.98650 | -1239.18830 | -1239.18339 | -1239.38115 | -1239.23103 | -1239.45179 |
| 3.50     | -1237.58387 | -1238.07556 | -1238.78514 | -1238.98552 | -1239.00542 | -1239.20723 | -1239.20247 | -1239.39988 | -1239.24897 | -1239.46951 |
| 3.59     | -1237.60035 | -1238.09064 | -1238.79984 | -1239.00017 | -1239.02035 | -1239.22220 | -1239.21769 | -1239.41480 | -1239.26297 | -1239.48337 |
| 3.68     | -1237.61355 | -1238.10249 | -1238.81123 | -1239.01151 | -1239.03192 | -1239.23382 | -1239.22965 | -1239.42647 | -1239.27367 | -1239.49397 |
| 3.78     | -1237.62399 | -1238.11162 | -1238.81983 | -1239.02005 | -1239.04067 | -1239.24265 | -1239.23884 | -1239.43536 | -1239.28157 | -1239.50181 |
| 3.87     | -1237.63215 | -1238.11847 | -1238.82606 | -1239.02623 | -1239.04702 | -1239.24911 | -1239.24566 | -1239.44189 | -1239.28711 | -1239.50733 |
| 3.97     | -1237.63846 | -1238.12340 | -1238.83027 | -1239.03043 | -1239.05133 | -1239.25358 | -1239.25045 | -1239.44639 | -1239.29063 | -1239.51088 |
| 4.06     | -1237.64327 | -1238.12676 | -1238.83277 | -1239.03296 | -1239.05391 | -1239.25641 | -1239.25352 | -1239.44918 | -1239.29244 | -1239.51280 |
| 4.16     | -1237.64692 | -1238.12880 | -1238.83383 | -1239.03410 | -1239.05503 | -1239.25787 | -1239.25511 | -1239.45051 | -1239.29281 | -1239.51337 |
| 4.35     | -1237.65166 | -1238.12977 | -1238.83257 | -1239.03313 | -1239.05389 | -1239.25759 | -1239.25474 | -1239.44973 | -1239.29030 | -1239.51152 |
| 4.44     | -1237.65312 | -1238.12987 | -1238.83040 | -1239.03116 | -1239.05179 | -1239.25600 | -1239.25292 | -1239.44775 | -1239.28760 | -1239.50927 |
| 4.54     | -1237.65417 | -1238.12924 | -1238.82700 | -1239.02797 | -1239.04847 | -1239.25321 | -1239.24979 | -1239.44448 | -1239.28373 | -1239.50593 |
| 4.63     | -1237.65494 | -1238.12788 | -1238.82301 | -1239.02408 | -1239.04457 | -1239.24971 | -1239.24604 | -1239.44049 | -1239.27933 | -1239.50196 |
| 4.72     | -1237.65543 | -1238.12579 | -1238.81960 | -1239.02064 | -1239.04128 | -1239.24658 | -1239.24286 | -1239.43701 | -1239.27568 | -1239.49844 |
| 4.82     | -1237.65558 | -1238.12358 | -1238.81678 | -1239.01776 | -1239.03860 | -1239.24395 | -1239.24028 | -1239.43415 | -1239.27276 | -1239.49553 |
| 4.91     | -1237.65536 | -1238.12143 | -1238.81418 | -1239.01507 | -1239.03614 | -1239.24149 | -1239.23791 | -1239.43152 | -1239.27012 | -1239.49285 |
| 5.01     | -1237.65482 | -1238.11921 | -1238.81162 | -1239.01242 | -1239.03372 | -1239.23905 | -1239.23561 | -1239.42898 | -1239.26759 | -1239.49024 |
| 5.10     | -1237.65397 | -1238.11685 | -1238.80907 | -1239.00979 | -1239.03131 | -1239.23660 | -1239.23333 | -1239.42648 | -1239.26511 | -1239.48767 |
| 5.20     | -1237.65287 | -1238.11436 | -1238.80651 | -1239.00714 | -1239.02889 | -1239.23413 | -1239.23105 | -1239.42400 | -1239.26265 | -1239.48512 |
| 5.29     | -1237.65156 | -1238.11177 | -1238.80395 | -1239.00449 | -1239.02647 | -1239.23163 | -1239.22878 | -1239.42154 | -1239.26022 | -1239.48257 |
| 5.39     | -1237.65006 | -1238.10909 | -1238.80140 | -1239.00183 | -1239.02404 | -1239.22911 | -1239.22652 | -1239.41909 | -1239.25781 | -1239.48004 |
| 5.48     | -1237.64843 | -1238.10636 | -1238.79886 | -1238.99919 | -1239.02162 | -1239.22659 | -1239.22429 | -1239.41668 | -1239.25542 | -1239.47753 |
| 5.57     | -1237.64669 | -1238.10359 | -1238.79635 | -1238.99658 | -1239.01922 | -1239.22409 | -1239.22210 | -1239.41432 | -1239.25308 | -1239.47506 |
| 5.67     | -1237.64487 | -1238.10081 | -1238.79388 | -1238.99401 | -1239.01686 | -1239.22161 | -1239.21996 | -1239.41201 | -1239.25079 | -1239.47265 |

Table S7: The absolute energies in hartree of the potential energy curve of VSi in the  $^2\Delta$  state with a CASSCF wave function and nom-CPO active space.

| Distance | CASSCF      | CASPT2      | tpbe        | ftpbe       | trevpbe     | ftrevpbe    | tblyp       | ftblyp      | torelyp     | ftorelyp    |
|----------|-------------|-------------|-------------|-------------|-------------|-------------|-------------|-------------|-------------|-------------|
| 5.76     | -1237.64300 | -1238.09803 | -1238.79146 | -1238.99149 | -1239.01454 | -1239.21917 | -1239.21788 | -1239.40978 | -1239.24856 | -1239.47029 |
| 5.86     | -1237.64110 | -1238.09528 | -1238.78910 | -1238.98902 | -1239.01227 | -1239.21678 | -1239.21586 | -1239.40762 | -1239.24639 | -1239.46800 |
| 5.95     | -1237.63919 | -1238.09257 | -1238.78680 | -1238.98663 | -1239.01006 | -1239.21444 | -1239.21392 | -1239.40556 | -1239.24430 | -1239.46579 |
| 6.05     | -1237.63729 | -1238.08993 | -1238.78457 | -1238.98431 | -1239.00792 | -1239.21217 | -1239.21207 | -1239.40359 | -1239.24228 | -1239.46367 |
| 6.14     | -1237.63542 | -1238.08735 | -1238.78241 | -1238.98208 | -1239.00584 | -1239.20998 | -1239.21030 | -1239.40174 | -1239.24033 | -1239.46164 |
| 6.24     | -1237.63360 | -1238.08483 | -1238.78032 | -1238.97993 | -1239.00382 | -1239.20785 | -1239.20862 | -1239.39999 | -1239.23847 | -1239.45970 |
| 6.33     | -1237.63184 | -1238.08241 | -1238.77830 | -1238.97786 | -1239.00187 | -1239.20581 | -1239.20703 | -1239.39836 | -1239.23668 | -1239.45786 |
| 6.43     | -1237.63015 | -1238.08008 | -1238.77635 | -1238.97587 | -1238.99998 | -1239.20384 | -1239.20552 | -1239.39683 | -1239.23496 | -1239.45612 |
| 6.52     | -1237.62855 | -1238.07786 | -1238.77447 | -1238.97397 | -1238.99816 | -1239.20194 | -1239.20408 | -1239.39540 | -1239.23332 | -1239.45446 |
| 6.61     | -1237.62703 | -1238.07575 | -1238.77264 | -1238.97213 | -1238.99639 | -1239.20012 | -1239.20271 | -1239.39407 | -1239.23174 | -1239.45289 |
| 6.71     | -1237.62560 | -1238.07375 | -1238.77087 | -1238.97036 | -1238.99468 | -1239.19835 | -1239.20141 | -1239.39282 | -1239.23022 | -1239.45139 |
| 6.80     | -1237.62428 | -1238.07188 | -1238.76915 | -1238.96865 | -1238.99301 | -1239.19665 | -1239.20015 | -1239.39164 | -1239.22875 | -1239.44995 |
| 6.90     | -1237.62305 | -1238.07012 | -1238.76748 | -1238.96700 | -1238.99140 | -1239.19501 | -1239.19894 | -1239.39052 | -1239.22734 | -1239.44858 |
| 6.99     | -1237.62192 | -1238.06849 | -1238.76587 | -1238.96541 | -1238.98984 | -1239.19344 | -1239.19778 | -1239.38945 | -1239.22598 | -1239.44726 |
| 7.09     | -1237.62088 | -1238.06697 | -1238.76432 | -1238.96389 | -1238.98834 | -1239.19193 | -1239.19666 | -1239.38844 | -1239.22468 | -1239.44601 |
| 7.18     | -1237.61993 | -1238.06556 | -1238.76283 | -1238.96242 | -1238.98690 | -1239.19048 | -1239.19559 | -1239.38748 | -1239.22344 | -1239.44481 |
| 7.28     | -1237.61906 | -1238.06426 | -1238.76140 | -1238.96103 | -1238.98554 | -1239.18911 | -1239.19456 | -1239.38656 | -1239.22227 | -1239.44367 |
| 7.37     | -1237.61828 | -1238.06306 | -1238.76005 | -1238.95970 | -1238.98424 | -1239.18780 | -1239.19358 | -1239.38568 | -1239.22116 | -1239.44260 |
| 7.46     | -1237.61756 | -1238.06195 | -1238.75876 | -1238.95844 | -1238.98301 | -1239.18657 | -1239.19265 | -1239.38485 | -1239.22013 | -1239.44159 |
| 7.56     | -1237.61692 | -1238.06094 | -1238.75756 | -1238.95725 | -1238.98186 | -1239.18542 | -1239.19178 | -1239.38407 | -1239.21916 | -1239.44064 |
| 7.65     | -1237.61633 | -1238.06002 | -1238.75642 | -1238.95614 | -1238.98079 | -1239.18434 | -1239.19095 | -1239.38333 | -1239.21827 | -1239.43976 |
| 7.75     | -1237.61580 | -1238.05917 | -1238.75537 | -1238.95510 | -1238.97980 | -1239.18334 | -1239.19018 | -1239.38265 | -1239.21745 | -1239.43894 |
| 7.84     | -1237.61532 | -1238.05839 | -1238.75439 | -1238.95414 | -1238.97888 | -1239.18242 | -1239.18947 | -1239.38201 | -1239.21670 | -1239.43820 |
| 7.94     | -1237.61489 | -1238.05768 | -1238.75348 | -1238.95325 | -1238.97804 | -1239.18157 | -1239.18880 | -1239.38142 | -1239.21602 | -1239.43751 |
| 8.03     | -1237.61450 | -1238.05703 | -1238.75265 | -1238.95242 | -1238.97726 | -1239.18078 | -1239.18819 | -1239.38087 | -1239.21540 | -1239.43689 |
| 8.13     | -1237.61415 | -1238.05643 | -1238.75188 | -1238.95166 | -1238.97655 | -1239.18007 | -1239.18762 | -1239.38037 | -1239.21484 | -1239.43632 |
| 8.22     | -1237.61383 | -1238.05589 | -1238.75117 | -1238.95096 | -1238.97590 | -1239.17941 | -1239.18711 | -1239.37991 | -1239.21434 | -1239.43581 |
| 8.31     | -1237.61354 | -1238.05539 | -1238.75053 | -1238.95032 | -1238.97532 | -1239.17882 | -1239.18664 | -1239.37949 | -1239.21390 | -1239.43536 |
| 8.41     | -1237.61327 | -1238.05493 | -1238.74994 | -1238.94974 | -1238.97479 | -1239.17828 | -1239.18621 | -1239.37911 | -1239.21351 | -1239.43495 |
| 8.50     | -1237.61304 | -1238.05451 | -1238.74940 | -1238.94920 | -1238.97431 | -1239.17779 | -1239.18582 | -1239.37876 | -1239.21316 | -1239.43459 |
| 8.60     | -1237.61282 | -1238.05413 | -1238.74892 | -1238.94872 | -1238.97388 | -1239.17735 | -1239.18547 | -1239.37844 | -1239.21285 | -1239.43426 |
| 8.69     | -1237.61263 | -1238.05378 | -1238.74847 | -1238.94828 | -1238.97350 | -1239.17695 | -1239.18515 | -1239.37815 | -1239.21258 | -1239.43398 |
| 8.79     | -1237.61245 | -1238.05346 | -1238.74807 | -1238.94787 | -1238.97315 | -1239.17660 | -1239.18486 | -1239.37788 | -1239.21235 | -1239.43372 |
| 8.88     | -1237.61229 | -1238.05317 | -1238.74771 | -1238.94751 | -1238.97284 | -1239.17627 | -1239.18460 | -1239.37764 | -1239.21214 | -1239.43350 |
| 8.98     | -1237.61214 | -1238.05290 | -1238.74738 | -1238.94718 | -1238.97256 | -1239.17599 | -1239.18437 | -1239.37741 | -1239.21197 | -1239.43331 |
| 9.07     | -1237.61201 | -1238.05265 | -1238.74709 | -1238.94688 | -1238.97232 | -1239.17573 | -1239.18416 | -1239.37720 | -1239.21182 | -1239.43315 |
| 9.17     | -1237.61189 | -1238.05243 | -1238.74682 | -1238.94661 | -1238.97210 | -1239.17550 | -1239.18398 | -1239.37702 | -1239.21169 | -1239.43300 |
| 9.26     | -1237.61178 | -1238.05222 | -1238.74658 | -1238.94637 | -1238.97190 | -1239.17530 | -1239.18382 | -1239.37687 | -1239.21159 | -1239.43288 |
| 9.35     | -1237.61168 | -1238.05203 | -1238.74637 | -1238.94615 | -1238.97173 | -1239.17512 | -1239.18367 | -1239.37673 | -1239.21150 | -1239.43278 |
| 9.45     | -1237.61159 | -1238.05185 | -1238.74617 | -1238.94595 | -1238.97158 | -1239.17495 | -1239.18354 | -1239.37661 | -1239.21142 | -1239.43269 |
| 9.54     | -1237.61150 | -1238.05169 | -1238.74599 | -1238.94577 | -1238.97144 | -1239.17481 | -1239.18343 | -1239.37650 | -1239.21136 | -1239.43261 |
| 9.64     | -1237.61142 | -1238.05154 | -1238.74583 | -1238.94561 | -1238.97132 | -1239.17468 | -1239.18332 | -1239.37640 | -1239.21131 | -1239.43254 |
| 9.73     | -1237.61135 | -1238.05141 | -1238.74569 | -1238.94546 | -1238.97121 | -1239.17456 | -1239.18323 | -1239.37631 | -1239.21126 | -1239.43249 |
| 9.83     | -1237.61129 | -1238.05128 | -1238.74556 | -1238.94532 | -1238.97112 | -1239.17446 | -1239.18315 | -1239.37623 | -1239.21123 | -1239.43244 |
| 9.92     | -1237.61123 | -1238.05117 | -1238.74544 | -1238.94520 | -1238.97104 | -1239.17437 | -1239.18308 | -1239.37617 | -1239.21121 | -1239.43240 |
| 10.02    | -1237.61118 | -1238.05106 | -1238.74534 | -1238.94509 | -1238.97097 | -1239.17429 | -1239.18302 | -1239.37611 | -1239.21119 | -1239.43237 |
| 10.11    | -1237.61113 | -1238.05097 | -1238.74524 | -1238.94499 | -1238.97090 | -1239.17422 | -1239.18297 | -1239.37606 | -1239.21117 | -1239.43235 |
| 10.20    | -1237.61108 | -1238.05089 | -1238.74516 | -1238.94490 | -1238.97085 | -1239.17415 | -1239.18292 | -1239.37601 | -1239.21116 | -1239.43232 |
| 10.30    | -1237.61104 | -1238.05081 | -1238.74508 | -1238.94482 | -1238.97080 | -1239.17410 | -1239.18288 | -1239.37597 | -1239.21116 | -1239.43230 |
| 10.39    | -1237.61100 | -1238.05075 | -1238.74501 | -1238.94475 | -1238.97075 | -1239.17404 | -1239.18285 | -1239.37593 | -1239.21115 | -1239.43229 |
| 10.49    | -1237.61097 | -1238.05070 | -1238.74494 | -1238.94468 | -1238.97071 | -1239.17400 | -1239.18282 | -1239.37590 | -1239.21115 | -1239.43228 |
| 10.58    | -1237.61094 | -1238.05065 | -1238.74488 | -1238.94462 | -1238.97068 | -1239.17395 | -1239.18279 | -1239.37587 | -1239.21115 | -1239.43227 |

Table S7: The absolute energies in hartree of the potential energy curve of VSi in the  $^2\Delta$  state with a CASSCF wave function and nom-CPO active space.

| Distance | CASSCF      | CASPT2      | tpbe        | ftpbe       | trevpbe     | ftrevpbe    | tblyp       | ftblyp      | torelyp     | ftorelyp    |
|----------|-------------|-------------|-------------|-------------|-------------|-------------|-------------|-------------|-------------|-------------|
| 10.68    | -1237.61091 | -1238.05062 | -1238.74483 | -1238.94456 | -1238.97065 | -1239.17392 | -1239.18277 | -1239.37585 | -1239.21115 | -1239.43226 |
| 10.77    | -1237.61088 | -1238.05060 | -1238.74479 | -1238.94451 | -1238.97062 | -1239.17389 | -1239.18276 | -1239.37583 | -1239.21116 | -1239.43225 |
| 10.87    | -1237.61085 | -1238.05059 | -1238.74474 | -1238.94446 | -1238.97060 | -1239.17386 | -1239.18274 | -1239.37581 | -1239.21116 | -1239.43225 |
| 10.96    | -1237.61083 | -1238.05059 | -1238.74471 | -1238.94442 | -1238.97058 | -1239.17383 | -1239.18273 | -1239.37580 | -1239.21116 | -1239.43225 |
| 11.05    | -1237.61081 | -1238.05061 | -1238.74467 | -1238.94439 | -1238.97056 | -1239.17381 | -1239.18272 | -1239.37579 | -1239.21117 | -1239.43225 |
| 11.15    | -1237.61079 | -1238.05063 | -1238.74464 | -1238.94435 | -1238.97055 | -1239.17379 | -1239.18271 | -1239.37578 | -1239.21118 | -1239.43224 |
| 11.24    | -1237.61077 | -1238.05067 | -1238.74461 | -1238.94432 | -1238.97053 | -1239.17377 | -1239.18271 | -1239.37578 | -1239.21118 | -1239.43224 |
| 11.34    | -1237.61075 | -1238.05071 | -1238.74458 | -1238.94429 | -1238.97052 | -1239.17375 | -1239.18270 | -1239.37577 | -1239.21119 | -1239.43224 |
| 11.43    | -1237.61073 | -1238.05073 | -1238.74456 | -1238.94426 | -1238.97051 | -1239.17374 | -1239.18270 | -1239.37576 | -1239.21119 | -1239.43224 |
| 11.53    | -1237.61072 | -1238.05073 | -1238.74453 | -1238.94423 | -1238.97050 | -1239.17372 | -1239.18269 | -1239.37575 | -1239.21119 | -1239.43223 |
| 11.62    | -1237.61071 | -1238.05072 | -1238.74451 | -1238.94421 | -1238.97049 | -1239.17371 | -1239.18270 | -1239.37575 | -1239.21120 | -1239.43223 |
| 11.72    | -1237.61069 | -1238.05067 | -1238.74450 | -1238.94419 | -1238.97048 | -1239.17370 | -1239.18270 | -1239.37576 | -1239.21121 | -1239.43224 |
| 11.81    | -1237.61068 | -1238.05059 | -1238.74448 | -1238.94417 | -1238.97048 | -1239.17369 | -1239.18270 | -1239.37576 | -1239.21122 | -1239.43224 |
| 11.91    | -1237.61067 | -1238.05044 | -1238.74446 | -1238.94415 | -1238.97047 | -1239.17367 | -1239.18270 | -1239.37575 | -1239.21122 | -1239.43223 |
| 12.00    | -1237.61066 | -1238.05025 | -1238.74445 | -1238.94414 | -1238.97046 | -1239.17366 | -1239.18270 | -1239.37575 | -1239.21122 | -1239.43223 |
| 12.09    | -1237.61065 | -1238.05003 | -1238.74443 | -1238.94412 | -1238.97046 | -1239.17366 | -1239.18271 | -1239.37576 | -1239.21123 | -1239.43223 |
| 12.19    | -1237.61064 | -1238.04983 | -1238.74442 | -1238.94411 | -1238.97045 | -1239.17365 | -1239.18271 | -1239.37576 | -1239.21123 | -1239.43223 |
| 12.28    | -1237.61063 | -1238.04967 | -1238.74441 | -1238.94410 | -1238.97045 | -1239.17364 | -1239.18271 | -1239.37576 | -1239.21123 | -1239.43223 |
| 12.38    | -1237.61062 | -1238.04954 | -1238.74440 | -1238.94408 | -1238.97044 | -1239.17364 | -1239.18272 | -1239.37576 | -1239.21124 | -1239.43223 |
| 12.47    | -1237.61061 | -1238.04944 | -1238.74439 | -1238.94407 | -1238.97044 | -1239.17363 | -1239.18272 | -1239.37577 | -1239.21124 | -1239.43223 |
| 12.57    | -1237.61061 | -1238.04937 | -1238.74438 | -1238.94406 | -1238.97044 | -1239.17362 | -1239.18273 | -1239.37577 | -1239.21124 | -1239.43222 |
| 12.66    | -1237.61060 | -1238.04930 | -1238.74437 | -1238.94405 | -1238.97043 | -1239.17362 | -1239.18273 | -1239.37577 | -1239.21124 | -1239.43222 |
| 12.76    | -1237.61059 | -1238.04926 | -1238.74436 | -1238.94404 | -1238.97043 | -1239.17361 | -1239.18274 | -1239.37577 | -1239.21124 | -1239.43222 |
| 12.85    | -1237.61059 | -1238.04921 | -1238.74435 | -1238.94403 | -1238.97043 | -1239.17361 | -1239.18274 | -1239.37578 | -1239.21124 | -1239.43222 |
| 12.94    | -1237.61058 | -1238.04918 | -1238.74435 | -1238.94403 | -1238.97042 | -1239.17360 | -1239.18275 | -1239.37578 | -1239.21125 | -1239.43222 |
| 13.04    | -1237.61058 | -1238.04915 | -1238.74434 | -1238.94402 | -1238.97042 | -1239.17360 | -1239.18275 | -1239.37579 | -1239.21125 | -1239.43222 |
| 13.13    | -1237.61057 | -1238.04913 | -1238.74434 | -1238.94402 | -1238.97042 | -1239.17360 | -1239.18276 | -1239.37579 | -1239.21125 | -1239.43222 |
| 13.23    | -1237.61056 | -1238.04911 | -1238.74433 | -1238.94401 | -1238.97042 | -1239.17360 | -1239.18276 | -1239.37580 | -1239.21125 | -1239.43222 |
| 13.32    | -1237.61056 | -1238.04909 | -1238.74433 | -1238.94401 | -1238.97042 | -1239.17359 | -1239.18277 | -1239.37580 | -1239.21125 | -1239.43222 |
| 13.42    | -1237.61056 | -1238.04907 | -1238.74432 | -1238.94400 | -1238.97041 | -1239.17359 | -1239.18277 | -1239.37581 | -1239.21125 | -1239.43222 |
| 13.51    | -1237.61055 | -1238.04847 | -1238.74432 | -1238.94400 | -1238.97041 | -1239.17359 | -1239.18278 | -1239.37581 | -1239.21125 | -1239.43222 |
| 13.61    | -1237.61055 | -1238.04845 | -1238.74431 | -1238.94399 | -1238.97041 | -1239.17358 | -1239.18278 | -1239.37581 | -1239.21125 | -1239.43222 |
| 13.70    | -1237.61054 | -1238.04843 | -1238.74431 | -1238.94399 | -1238.97041 | -1239.17358 | -1239.18278 | -1239.37581 | -1239.21125 | -1239.43221 |
| 13.80    | -1237.61054 | -1238.04842 | -1238.74431 | -1238.94398 | -1238.97041 | -1239.17358 | -1239.18279 | -1239.37582 | -1239.21125 | -1239.43221 |
| 13.89    | -1237.61054 | -1238.04841 | -1238.74430 | -1238.94398 | -1238.97040 | -1239.17358 | -1239.18279 | -1239.37582 | -1239.21125 | -1239.43221 |
| 13.98    | -1237.61053 | -1238.04839 | -1238.74430 | -1238.94397 | -1238.97040 | -1239.17358 | -1239.18279 | -1239.37582 | -1239.21125 | -1239.43221 |
| 14.08    | -1237.61053 | -1238.04838 | -1238.74430 | -1238.94397 | -1238.97040 | -1239.17358 | -1239.18280 | -1239.37582 | -1239.21125 | -1239.43221 |
| 14.17    | -1237.61053 | -1238.04837 | -1238.74429 | -1238.94397 | -1238.97040 | -1239.17358 | -1239.18280 | -1239.37583 | -1239.21125 | -1239.43221 |
| 14.27    | -1237.61052 | -1238.04836 | -1238.74429 | -1238.94397 | -1238.97040 | -1239.17358 | -1239.18280 | -1239.37583 | -1239.21125 | -1239.43221 |
| 14.36    | -1237.61052 | -1238.04835 | -1238.74429 | -1238.94396 | -1238.97040 | -1239.17358 | -1239.18281 | -1239.37583 | -1239.21125 | -1239.43221 |
| 14.46    | -1237.61052 | -1238.04834 | -1238.74429 | -1238.94396 | -1238.97039 | -1239.17358 | -1239.18281 | -1239.37584 | -1239.21125 | -1239.43221 |
| 14.55    | -1237.61051 | -1238.04834 | -1238.74429 | -1238.94396 | -1238.97039 | -1239.17358 | -1239.18281 | -1239.37584 | -1239.21125 | -1239.43221 |
| 14.65    | -1237.61051 | -1238.04833 | -1238.74428 | -1238.94396 | -1238.97039 | -1239.17358 | -1239.18282 | -1239.37584 | -1239.21126 | -1239.43221 |
| 14.74    | -1237.61051 | -1238.04832 | -1238.74428 | -1238.94396 | -1238.97039 | -1239.17358 | -1239.18282 | -1239.37585 | -1239.21126 | -1239.43221 |
| 14.83    | -1237.61051 | -1238.04831 | -1238.74428 | -1238.94396 | -1238.97039 | -1239.17358 | -1239.18282 | -1239.37585 | -1239.21126 | -1239.43221 |
| 14.93    | -1237.61050 | -1238.04831 | -1238.74428 | -1238.94395 | -1238.97039 | -1239.17358 | -1239.18282 | -1239.37585 | -1239.21125 | -1239.43221 |
| 15.02    | -1237.61050 | -1238.04830 | -1238.74428 | -1238.94395 | -1238.97039 | -1239.17358 | -1239.18283 | -1239.37585 | -1239.21125 | -1239.43221 |
| 15.12    | -1237.61050 | -1238.04829 | -1238.74427 | -1238.94395 | -1238.97039 | -1239.17358 | -1239.18283 | -1239.37586 | -1239.21125 | -1239.43221 |
| 15.21    | -1237.61050 | -1238.04829 | -1238.74427 | -1238.94395 | -1238.97038 | -1239.17358 | -1239.18283 | -1239.37586 | -1239.21125 | -1239.43221 |
| 15.31    | -1237.61050 | -1238.04827 | -1238.74427 | -1238.94395 | -1238.97038 | -1239.17358 | -1239.18283 | -1239.37586 | -1239.21125 | -1239.43220 |
| 15.40    | -1237.61049 | -1238.04826 | -1238.74427 | -1238.94395 | -1238.97038 | -1239.17358 | -1239.18283 | -1239.37586 | -1239.21125 | -1239.43220 |
| 15.50    | -1237.61049 | -1238.04826 | -1238.74427 | -1238.94395 | -1238.97038 | -1239.17358 | -1239.18284 | -1239.37587 | -1239.21125 | -1239.43221 |

Table S7: The absolute energies in hartree of the potential energy curve of VSi in the  $^2\Delta$  state with a CASSCF wave function and nom-CPO active space.

| Distance | CASSCF      | CASPT2      | tpbe        | ftpbe       | trevpbe     | ftrevpbe    | tblyp       | ftblyp      | torelyp     | ftorelyp    |
|----------|-------------|-------------|-------------|-------------|-------------|-------------|-------------|-------------|-------------|-------------|
| 15.59    | -1237.61049 | -1238.04825 | -1238.74427 | -1238.94395 | -1238.97038 | -1239.17358 | -1239.18284 | -1239.37587 | -1239.21126 | -1239.43221 |
| 15.68    | -1237.61049 | -1238.04825 | -1238.74427 | -1238.94395 | -1238.97038 | -1239.17358 | -1239.18284 | -1239.37587 | -1239.21126 | -1239.43221 |
| 15.78    | -1237.61049 | -1238.04824 | -1238.74427 | -1238.94394 | -1238.97038 | -1239.17358 | -1239.18285 | -1239.37587 | -1239.21126 | -1239.43221 |
| 15.87    | -1237.61049 | -1238.04824 | -1238.74427 | -1238.94394 | -1238.97038 | -1239.17358 | -1239.18285 | -1239.37587 | -1239.21126 | -1239.43221 |
| 15.97    | -1237.61048 | -1238.04821 | -1238.74427 | -1238.94394 | -1238.97038 | -1239.17358 | -1239.18285 | -1239.37588 | -1239.21126 | -1239.43221 |
| 16.06    | -1237.61048 | -1238.04821 | -1238.74427 | -1238.94394 | -1238.97038 | -1239.17358 | -1239.18285 | -1239.37588 | -1239.21126 | -1239.43221 |
| 16.16    | -1237.61048 | -1238.04821 | -1238.74427 | -1238.94394 | -1238.97038 | -1239.17358 | -1239.18285 | -1239.37588 | -1239.21126 | -1239.43221 |
| 16.25    | -1237.61048 | -1238.04821 | -1238.74426 | -1238.94394 | -1238.97038 | -1239.17358 | -1239.18285 | -1239.37588 | -1239.21126 | -1239.43221 |
| 16.35    | -1237.61048 | -1238.04821 | -1238.74426 | -1238.94394 | -1238.97038 | -1239.17358 | -1239.18285 | -1239.37588 | -1239.21126 | -1239.43221 |
| 16.44    | -1237.61048 | -1238.04821 | -1238.74426 | -1238.94394 | -1238.97038 | -1239.17358 | -1239.18286 | -1239.37588 | -1239.21126 | -1239.43221 |
| 16.54    | -1237.61048 | -1238.04821 | -1238.74426 | -1238.94394 | -1238.97038 | -1239.17358 | -1239.18286 | -1239.37588 | -1239.21125 | -1239.43221 |
| 16.63    | -1237.61047 | -1238.04821 | -1238.74426 | -1238.94394 | -1238.97038 | -1239.17358 | -1239.18286 | -1239.37588 | -1239.21125 | -1239.43221 |
| 16.72    | -1237.61047 | -1238.04821 | -1238.74426 | -1238.94394 | -1238.97038 | -1239.17358 | -1239.18286 | -1239.37588 | -1239.21125 | -1239.43221 |
| 16.82    | -1237.61047 | -1238.04821 | -1238.74426 | -1238.94394 | -1238.97037 | -1239.17358 | -1239.18286 | -1239.37589 | -1239.21125 | -1239.43221 |
| 16.91    | -1237.61047 | -1238.04821 | -1238.74426 | -1238.94394 | -1238.97037 | -1239.17358 | -1239.18286 | -1239.37589 | -1239.21125 | -1239.43221 |
| 17.01    | -1237.61047 | -1238.04821 | -1238.74426 | -1238.94394 | -1238.97037 | -1239.17358 | -1239.18286 | -1239.37589 | -1239.21125 | -1239.43221 |
| 17.10    | -1237.61047 | -1238.04821 | -1238.74426 | -1238.94394 | -1238.97037 | -1239.17358 | -1239.18286 | -1239.37589 | -1239.21125 | -1239.43221 |
| 17.20    | -1237.61047 | -1238.04821 | -1238.74426 | -1238.94394 | -1238.97037 | -1239.17358 | -1239.18286 | -1239.37589 | -1239.21125 | -1239.43221 |
| 17.29    | -1237.61047 | -1238.04821 | -1238.74426 | -1238.94394 | -1238.97037 | -1239.17358 | -1239.18286 | -1239.37589 | -1239.21125 | -1239.43221 |
| 17.39    | -1237.61047 | -1238.04821 | -1238.74426 | -1238.94394 | -1238.97037 | -1239.17358 | -1239.18286 | -1239.37589 | -1239.21125 | -1239.43221 |
| 17.48    | -1237.61046 | -1238.04821 | -1238.74426 | -1238.94394 | -1238.97037 | -1239.17358 | -1239.18286 | -1239.37589 | -1239.21125 | -1239.43221 |
| 17.57    | -1237.61046 | -1238.04821 | -1238.74426 | -1238.94394 | -1238.97037 | -1239.17358 | -1239.18287 | -1239.37589 | -1239.21125 | -1239.43221 |
| 17.67    | -1237.61046 | -1238.04821 | -1238.74426 | -1238.94394 | -1238.97037 | -1239.17358 | -1239.18287 | -1239.37589 | -1239.21125 | -1239.43221 |
| 17.76    | -1237.61046 | -1238.04821 | -1238.74426 | -1238.94394 | -1238.97037 | -1239.17358 | -1239.18287 | -1239.37590 | -1239.21125 | -1239.43221 |
| 17.86    | -1237.61046 | -1238.04821 | -1238.74426 | -1238.94394 | -1238.97037 | -1239.17358 | -1239.18287 | -1239.37590 | -1239.21125 | -1239.43221 |
| 17.95    | -1237.61046 | -1238.04821 | -1238.74426 | -1238.94393 | -1238.97037 | -1239.17358 | -1239.18287 | -1239.37590 | -1239.21125 | -1239.43221 |
| 18.05    | -1237.61046 | -1238.04821 | -1238.74426 | -1238.94393 | -1238.97037 | -1239.17358 | -1239.18287 | -1239.37590 | -1239.21125 | -1239.43221 |

Table S8: The absolute energies in hartree of the potential energy curve of VSi in the  $^4\Pi$  state with a SP-based wave function and nom-CPO active space.

| Distance | SP          | tpbe        | ftpbe       | trevpbe     | ftrevpbe    | tblyp       | ftblyp      | torelyp     | ftorelyp    |
|----------|-------------|-------------|-------------|-------------|-------------|-------------|-------------|-------------|-------------|
| 1.98     | -1235.42856 | -1236.68402 | -1236.68402 | -1236.88451 |             | -1237.09693 | -1237.29391 | -1237.16678 | -1237.38708 |
| 2.08     | -1235.85641 | -1237.10455 | -1237.10455 | -1237.30404 |             | -1237.51803 | -1237.71395 | -1237.58435 | -1237.80332 |
| 2.17     | -1236.19035 | -1237.43279 | -1237.43279 | -1237.63154 |             | -1237.84687 | -1238.04194 | -1237.91003 | -1238.12806 |
| 2.27     | -1236.45192 | -1237.68999 | -1237.68999 | -1237.88821 |             | -1238.10477 | -1238.29921 | -1238.16511 | -1238.38248 |
| 2.36     | -1236.65789 | -1237.89289 | -1237.89289 | -1238.09066 |             | -1238.30841 | -1238.50241 | -1238.36634 | -1238.58327 |
| 2.46     | -1236.82170 | -1238.05283 | -1238.05283 | -1238.25046 |             | -1238.46915 | -1238.66404 | -1238.52476 | -1238.74562 |
| 2.55     | -1236.95571 | -1238.18059 | -1238.18059 | -1238.37901 |             | -1238.59740 | -1238.79296 | -1238.65063 | -1238.87334 |
| 2.65     | -1237.05979 | -1238.28362 | -1238.28362 | -1238.48656 |             | -1238.70453 | -1238.90447 | -1238.74454 | -1238.96804 |
| 2.74     | -1237.15596 | -1238.37941 | -1238.37941 | -1238.58327 |             | -1238.80041 | -1239.00096 | -1238.83942 | -1239.06395 |
| 2.83     | -1237.23895 | -1238.46063 | -1238.46063 | -1238.66484 | -1238.88183 | -1238.88078 | -1239.08064 | -1238.91984 | -1239.14554 |
| 2.93     | -1237.31252 | -1238.53105 | -1238.53105 | -1238.73388 | -1238.95178 | -1238.95082 | -1239.14885 | -1238.98975 | -1239.21429 |
| 3.02     | -1237.37517 | -1238.59091 | -1238.59091 | -1238.79281 | -1239.01129 | -1239.01073 | -1239.20761 | -1239.04930 | -1239.27286 |
| 3.12     | -1237.42795 | -1238.64138 | -1238.64138 | -1238.84271 | -1239.06165 | -1239.06133 | -1239.25753 | -1239.09940 | -1239.32224 |
| 3.21     | -1237.47219 | -1238.68347 | -1238.68347 | -1238.88433 | -1239.10370 | -1239.10359 | -1239.29925 | -1239.14115 | -1239.36337 |
| 3.31     | -1237.50909 | -1238.71834 | -1238.71834 | -1238.91878 | -1239.13855 | -1239.13866 | -1239.33382 | -1239.17575 | -1239.39741 |
| 3.40     | -1237.53970 | -1238.74702 | -1238.74702 | -1238.94708 | -1239.16723 | -1239.16757 | -1239.36227 | -1239.20421 | -1239.42535 |
| 3.50     | -1237.56489 | -1238.77038 | -1238.77038 | -1238.97010 | -1239.19062 | -1239.19120 | -1239.38547 | -1239.22742 | -1239.44809 |
| 3.59     | -1237.58547 | -1238.78923 | -1238.78923 | -1238.98864 | -1239.20950 | -1239.21033 | -1239.40420 | -1239.24615 | -1239.46640 |
| 3.68     | -1237.60210 | -1238.80423 | -1238.80423 | -1239.00335 | -1239.22455 | -1239.22564 | -1239.41912 | -1239.26108 | -1239.48093 |



Table S8: The absolute energies in hartree of the potential energy curve of VSi in the  $^4\Pi$  state with a SP-based wave function and nom-CPO active space.

| Distance | SP          | tpbe        | ftpb        | trevpb      | ftrevpb     | tblyp       | ftblyp      | torelyp     | ftorelyp    |
|----------|-------------|-------------|-------------|-------------|-------------|-------------|-------------|-------------|-------------|
| 3.78     | -1237.61540 | -1238.81594 | -1238.81594 | -1239.01480 | -1239.23633 | -1239.23768 | -1239.43078 | -1239.27275 | -1239.49225 |
| 3.87     | -1237.62588 | -1238.82485 | -1238.82485 | -1239.02349 | -1239.24533 | -1239.24692 | -1239.43967 | -1239.28164 | -1239.50083 |
| 3.97     | -1237.63402 | -1238.83136 | -1238.83136 | -1239.02981 | -1239.25196 | -1239.25376 | -1239.44618 | -1239.28813 | -1239.50705 |
| 4.06     | -1237.64023 | -1238.83581 | -1238.83581 | -1239.03412 | -1239.25659 | -1239.25854 | -1239.45066 | -1239.29254 | -1239.51127 |
| 4.16     | -1237.64484 | -1238.83845 | -1238.83845 | -1239.03668 | -1239.25947 | -1239.26150 | -1239.45336 | -1239.29512 | -1239.51372 |
| 4.35     | -1237.64818 | -1238.83949 | -1238.83949 | -1239.03769 | -1239.26082 | -1239.26283 | -1239.45448 | -1239.29605 | -1239.51461 |
| 4.44     | -1237.65051 | -1238.83912 | -1238.83912 | -1239.03737 | -1239.26084 | -1239.26273 | -1239.45423 | -1239.29553 | -1239.51414 |
| 4.54     | -1237.65206 | -1238.83753 | -1238.83753 | -1239.03590 | -1239.25974 | -1239.26139 | -1239.45279 | -1239.29375 | -1239.51251 |
| 4.63     | -1237.65300 | -1238.83495 | -1238.83495 | -1239.03350 | -1239.25771 | -1239.25901 | -1239.45039 | -1239.29097 | -1239.50996 |
| 4.72     | -1237.65347 | -1238.83160 | -1238.83160 | -1239.03035 | -1239.25495 | -1239.25583 | -1239.44722 | -1239.28741 | -1239.50669 |
| 4.82     | -1237.65357 | -1238.82770 | -1238.82770 | -1239.02667 | -1239.25167 | -1239.25207 | -1239.44351 | -1239.28333 | -1239.50295 |
| 4.91     | -1237.65289 | -1238.81929 | -1238.81929 | -1239.01868 | -1239.24808 | -1239.24392 | -1239.43551 | -1239.27474 | -1239.49505 |
| 5.01     | -1237.65219 | -1238.81519 | -1238.81519 | -1239.01474 | -1239.24441 | -1239.23997 | -1239.43162 | -1239.27064 | -1239.49125 |
| 5.10     | -1237.65127 | -1238.81124 | -1238.81124 | -1239.01092 | -1239.24081 | -1239.23620 | -1239.42788 | -1239.26674 | -1239.48760 |
| 5.20     | -1237.65017 | -1238.80736 | -1238.80736 | -1239.00715 | -1239.23728 | -1239.23253 | -1239.42423 | -1239.26298 | -1239.48403 |
| 5.29     | -1237.64890 | -1238.80380 | -1238.80380 | -1239.00364 | -1239.23377 | -1239.22920 | -1239.42091 | -1239.25957 | -1239.48076 |
| 5.39     | -1237.64747 | -1238.80070 | -1238.80070 | -1239.00058 | -1239.23048 | -1239.22636 | -1239.41807 | -1239.25666 | -1239.47796 |
| 5.48     | -1237.64590 | -1238.79788 | -1238.79788 | -1238.99779 | -1239.22761 | -1239.22382 | -1239.41553 | -1239.25405 | -1239.47545 |
| 5.57     | -1237.64421 | -1238.79520 | -1238.79520 | -1238.99514 | -1239.22499 | -1239.22143 | -1239.41315 | -1239.25160 | -1239.47309 |
| 5.67     | -1237.64243 | -1238.79263 | -1238.79263 | -1238.99259 | -1239.22249 | -1239.21917 | -1239.41089 | -1239.24925 | -1239.47083 |
| 5.76     | -1237.64057 | -1238.79015 | -1238.79015 | -1238.99012 | -1239.22008 | -1239.21700 | -1239.40874 | -1239.24700 | -1239.46866 |
| 5.86     | -1237.63867 | -1238.78775 | -1238.78775 | -1238.98774 | -1239.21773 | -1239.21493 | -1239.40668 | -1239.24484 | -1239.46657 |
| 5.95     | -1237.63674 | -1238.78544 | -1238.78544 | -1238.98543 | -1239.21545 | -1239.21295 | -1239.40474 | -1239.24277 | -1239.46458 |
| 6.05     | -1237.63480 | -1238.78321 | -1238.78321 | -1238.98322 | -1239.21324 | -1239.21107 | -1239.40289 | -1239.24078 | -1239.46268 |
| 6.14     | -1237.63288 | -1238.78105 | -1238.78105 | -1238.98108 | -1239.21111 | -1239.20929 | -1239.40115 | -1239.23887 | -1239.46085 |
| 6.24     | -1237.63098 | -1238.77898 | -1238.77898 | -1238.97902 | -1239.20903 | -1239.20760 | -1239.39951 | -1239.23705 | -1239.45910 |
| 6.33     | -1237.62912 | -1238.77699 | -1238.77699 | -1238.97702 | -1239.20702 | -1239.20600 | -1239.39797 | -1239.23530 | -1239.45743 |
| 6.43     | -1237.62732 | -1238.77506 | -1238.77506 | -1238.97511 | -1239.20507 | -1239.20448 | -1239.39653 | -1239.23363 | -1239.45585 |
| 6.52     | -1237.62558 | -1238.77321 | -1238.77321 | -1238.97327 | -1239.20319 | -1239.20306 | -1239.39519 | -1239.23204 | -1239.45435 |
| 6.61     | -1237.62393 | -1238.77141 | -1238.77141 | -1238.97149 | -1239.20138 | -1239.20172 | -1239.39395 | -1239.23052 | -1239.45290 |
| 6.71     | -1237.62237 | -1238.76968 | -1238.76968 | -1238.96976 | -1239.19961 | -1239.20045 | -1239.39278 | -1239.22905 | -1239.45150 |
| 6.80     | -1237.62090 | -1238.76799 | -1238.76799 | -1238.96808 | -1239.19789 | -1239.19924 | -1239.39169 | -1239.22763 | -1239.45015 |
| 6.90     | -1237.61955 | -1238.76633 | -1238.76633 | -1238.96644 | -1239.19620 | -1239.19808 | -1239.39066 | -1239.22626 | -1239.44884 |
| 6.99     | -1237.61831 | -1238.76469 | -1238.76469 | -1238.96482 | -1239.19455 | -1239.19695 | -1239.38967 | -1239.22490 | -1239.44754 |
| 7.09     | -1237.61719 | -1238.76308 | -1238.76308 | -1238.96323 | -1239.19293 | -1239.19584 | -1239.38872 | -1239.22358 | -1239.44625 |
| 7.18     | -1237.61619 | -1238.76151 | -1238.76151 | -1238.96168 | -1239.19132 | -1239.19477 | -1239.38779 | -1239.22230 | -1239.44499 |
| 7.28     | -1237.61531 | -1238.76000 | -1238.76000 | -1238.96019 | -1239.18976 | -1239.19375 | -1239.38691 | -1239.22108 | -1239.44379 |
| 7.37     | -1237.61455 | -1238.75859 | -1238.75859 | -1238.95880 | -1239.18827 | -1239.19279 | -1239.38609 | -1239.21995 | -1239.44267 |
| 7.46     | -1237.61389 | -1238.75729 | -1238.75729 | -1238.95754 | -1239.18689 | -1239.19190 | -1239.38532 | -1239.21894 | -1239.44165 |
| 7.56     | -1237.61331 | -1238.75613 | -1238.75613 | -1238.95639 | -1239.18564 | -1239.19111 | -1239.38462 | -1239.21803 | -1239.44074 |
| 7.65     | -1237.61281 | -1238.75509 | -1238.75509 | -1238.95537 | -1239.18452 | -1239.19039 | -1239.38398 | -1239.21724 | -1239.43994 |
| 7.75     | -1237.61237 | -1238.75416 | -1238.75416 | -1238.95445 | -1239.18352 | -1239.18975 | -1239.38340 | -1239.21655 | -1239.43923 |
| 7.84     | -1237.61198 | -1238.75333 | -1238.75333 | -1238.95363 | -1239.18265 | -1239.18918 | -1239.38288 | -1239.21595 | -1239.43861 |
| 7.94     | -1237.61164 | -1238.75259 | -1238.75259 | -1238.95289 | -1239.18187 | -1239.18866 | -1239.38240 | -1239.21542 | -1239.43807 |
| 8.03     | -1237.61133 | -1238.75192 | -1238.75192 | -1238.95223 | -1239.18118 | -1239.18820 | -1239.38197 | -1239.21496 | -1239.43759 |
| 8.13     | -1237.61105 | -1238.75133 | -1238.75133 | -1238.95163 | -1239.18057 | -1239.18779 | -1239.38158 | -1239.21456 | -1239.43718 |
| 8.22     | -1237.61081 | -1238.75079 | -1238.75079 | -1238.95109 | -1239.18003 | -1239.18742 | -1239.38123 | -1239.21422 | -1239.43681 |
| 8.31     | -1237.61059 | -1238.75031 | -1238.75031 | -1238.95061 | -1239.17954 | -1239.18709 | -1239.38091 | -1239.21392 | -1239.43650 |
| 8.41     | -1237.61039 | -1238.74987 | -1238.74987 | -1238.95017 | -1239.17910 | -1239.18680 | -1239.38062 | -1239.21366 | -1239.43622 |
| 8.50     | -1237.61021 | -1238.74948 | -1238.74948 | -1238.94977 | -1239.17871 | -1239.18653 | -1239.38036 | -1239.21344 | -1239.43598 |
| 8.60     | -1237.61004 | -1238.74912 | -1238.74912 | -1238.94940 | -1239.17837 | -1239.18629 | -1239.38012 | -1239.21324 | -1239.43577 |
| 8.69     | -1237.60989 | -1238.74879 | -1238.74879 | -1238.94907 | -1239.17805 | -1239.18608 | -1239.37990 | -1239.21308 | -1239.43558 |

Table S8: The absolute energies in hartree of the potential energy curve of VSi in the  $^4\Pi$  state with a SP-based wave function and nom-CPO active space.

| Distance | SP          | tpbe        | ftpbe       | trevpbe     | ftrevpbe    | tblyp       | ftblyp      | torelyp     | ftorelyp    |
|----------|-------------|-------------|-------------|-------------|-------------|-------------|-------------|-------------|-------------|
| 8.79     | -1237.60976 | -1238.74850 | -1238.74850 | -1238.94877 | -1239.17777 | -1239.18588 | -1239.37971 | -1239.21294 | -1239.43542 |
| 8.88     | -1237.60963 | -1238.74823 | -1238.74823 | -1238.94850 | -1239.17752 | -1239.18571 | -1239.37953 | -1239.21282 | -1239.43528 |
| 8.98     | -1237.60952 | -1238.74799 | -1238.74799 | -1238.94825 | -1239.17729 | -1239.18555 | -1239.37937 | -1239.21272 | -1239.43517 |
| 9.07     | -1237.60941 | -1238.74778 | -1238.74778 | -1238.94802 | -1239.17709 | -1239.18542 | -1239.37923 | -1239.21264 | -1239.43507 |
| 9.17     | -1237.60932 | -1238.74758 | -1238.74758 | -1238.94782 | -1239.17691 | -1239.18530 | -1239.37910 | -1239.21258 | -1239.43498 |
| 9.26     | -1237.60923 | -1238.74741 | -1238.74741 | -1238.94764 | -1239.17675 | -1239.18519 | -1239.37899 | -1239.21253 | -1239.43491 |
| 9.35     | -1237.60915 | -1238.74725 | -1238.74725 | -1238.94747 | -1239.17660 | -1239.18510 | -1239.37889 | -1239.21249 | -1239.43486 |
| 9.45     | -1237.60908 | -1238.74711 | -1238.74711 | -1238.94732 | -1239.17648 | -1239.18502 | -1239.37879 | -1239.21245 | -1239.43481 |
| 9.54     | -1237.60901 | -1238.74698 | -1238.74698 | -1238.94718 | -1239.17637 | -1239.18495 | -1239.37871 | -1239.21243 | -1239.43477 |
| 9.64     | -1237.60895 | -1238.74686 | -1238.74686 | -1238.94706 | -1239.17626 | -1239.18488 | -1239.37864 | -1239.21242 | -1239.43474 |
| 9.73     | -1237.60889 | -1238.74676 | -1238.74676 | -1238.94694 | -1239.17618 | -1239.18482 | -1239.37857 | -1239.21240 | -1239.43471 |
| 9.83     | -1237.60884 | -1238.74666 | -1238.74666 | -1238.94684 | -1239.17609 | -1239.18478 | -1239.37852 | -1239.21240 | -1239.43468 |
| 9.92     | -1237.60879 | -1238.74657 | -1238.74657 | -1238.94674 | -1239.17602 | -1239.18473 | -1239.37846 | -1239.21240 | -1239.43466 |
| 10.02    | -1237.60875 | -1238.74649 | -1238.74649 | -1238.94665 | -1239.17596 | -1239.18470 | -1239.37842 | -1239.21240 | -1239.43465 |
| 10.11    | -1237.60870 | -1238.74642 | -1238.74642 | -1238.94657 | -1239.17590 | -1239.18467 | -1239.37838 | -1239.21240 | -1239.43463 |
| 10.20    | -1237.60867 | -1238.74636 | -1238.74636 | -1238.94650 | -1239.17584 | -1239.18464 | -1239.37835 | -1239.21241 | -1239.43462 |
| 10.30    | -1237.60863 | -1238.74630 | -1238.74630 | -1238.94644 | -1239.17580 | -1239.18462 | -1239.37832 | -1239.21242 | -1239.43462 |
| 10.39    | -1237.60860 | -1238.74625 | -1238.74625 | -1238.94638 | -1239.17576 | -1239.18461 | -1239.37829 | -1239.21243 | -1239.43462 |
| 10.49    | -1237.60857 | -1238.74620 | -1238.74620 | -1238.94633 | -1239.17572 | -1239.18459 | -1239.37827 | -1239.21244 | -1239.43462 |
| 10.58    | -1237.60854 | -1238.74616 | -1238.74616 | -1238.94628 | -1239.17569 | -1239.18458 | -1239.37825 | -1239.21246 | -1239.43462 |
| 10.68    | -1237.60851 | -1238.74612 | -1238.74612 | -1238.94624 | -1239.17567 | -1239.18457 | -1239.37824 | -1239.21247 | -1239.43462 |
| 10.77    | -1237.60849 | -1238.74609 | -1238.74609 | -1238.94620 | -1239.17564 | -1239.18457 | -1239.37823 | -1239.21248 | -1239.43462 |
| 10.87    | -1237.60846 | -1238.74606 | -1238.74606 | -1238.94616 | -1239.17562 | -1239.18456 | -1239.37821 | -1239.21249 | -1239.43462 |
| 10.96    | -1237.60844 | -1238.74603 | -1238.74603 | -1238.94612 | -1239.17560 | -1239.18456 | -1239.37820 | -1239.21250 | -1239.43462 |
| 11.05    | -1237.60842 | -1238.74600 | -1238.74600 | -1238.94609 | -1239.17558 | -1239.18455 | -1239.37820 | -1239.21251 | -1239.43462 |
| 11.15    | -1237.60840 | -1238.74597 | -1238.74597 | -1238.94606 | -1239.17556 | -1239.18455 | -1239.37819 | -1239.21252 | -1239.43462 |
| 11.24    | -1237.60839 | -1238.74595 | -1238.74595 | -1238.94603 | -1239.17554 | -1239.18456 | -1239.37819 | -1239.21253 | -1239.43461 |
| 11.34    | -1237.60837 | -1238.74593 | -1238.74593 | -1238.94600 | -1239.17553 | -1239.18456 | -1239.37818 | -1239.21254 | -1239.43461 |
| 11.43    | -1237.60835 | -1238.74591 | -1238.74591 | -1238.94598 | -1239.17551 | -1239.18456 | -1239.37818 | -1239.21256 | -1239.43461 |
| 11.53    | -1237.60834 | -1238.74589 | -1238.74589 | -1238.94596 | -1239.17550 | -1239.18457 | -1239.37818 | -1239.21257 | -1239.43462 |
| 11.62    | -1237.60833 | -1238.74588 | -1238.74588 | -1238.94595 | -1239.17549 | -1239.18457 | -1239.37818 | -1239.21258 | -1239.43462 |
| 11.72    | -1237.60831 | -1238.74587 | -1238.74587 | -1238.94593 | -1239.17548 | -1239.18458 | -1239.37819 | -1239.21258 | -1239.43462 |
| 11.81    | -1237.60830 | -1238.74585 | -1238.74585 | -1238.94591 | -1239.17548 | -1239.18458 | -1239.37819 | -1239.21259 | -1239.43462 |
| 11.91    | -1237.60829 | -1238.74584 | -1238.74584 | -1238.94590 | -1239.17547 | -1239.18459 | -1239.37819 | -1239.21260 | -1239.43462 |
| 12.00    | -1237.60828 | -1238.74583 | -1238.74583 | -1238.94589 | -1239.17546 | -1239.18460 | -1239.37819 | -1239.21260 | -1239.43462 |
| 12.09    | -1237.60827 | -1238.74582 | -1238.74582 | -1238.94587 | -1239.17546 | -1239.18460 | -1239.37819 | -1239.21260 | -1239.43461 |
| 12.19    | -1237.60826 | -1238.74581 | -1238.74581 | -1238.94586 | -1239.17545 | -1239.18460 | -1239.37820 | -1239.21261 | -1239.43461 |
| 12.28    | -1237.60825 | -1238.74580 | -1238.74580 | -1238.94585 | -1239.17544 | -1239.18461 | -1239.37820 | -1239.21261 | -1239.43461 |
| 12.38    | -1237.60824 | -1238.74579 | -1238.74579 | -1238.94584 | -1239.17544 | -1239.18462 | -1239.37820 | -1239.21262 | -1239.43461 |
| 12.47    | -1237.60824 | -1238.74578 | -1238.74578 | -1238.94583 | -1239.17543 | -1239.18462 | -1239.37821 | -1239.21262 | -1239.43461 |
| 12.57    | -1237.60823 | -1238.74578 | -1238.74578 | -1238.94582 | -1239.17542 | -1239.18463 | -1239.37821 | -1239.21262 | -1239.43460 |
| 12.66    | -1237.60822 | -1238.74577 | -1238.74577 | -1238.94581 | -1239.17542 | -1239.18464 | -1239.37822 | -1239.21263 | -1239.43460 |
| 12.76    | -1237.60822 | -1238.74576 | -1238.74576 | -1238.94580 | -1239.17541 | -1239.18464 | -1239.37822 | -1239.21263 | -1239.43460 |
| 12.85    | -1237.60821 | -1238.74576 | -1238.74576 | -1238.94580 | -1239.17541 | -1239.18465 | -1239.37822 | -1239.21263 | -1239.43460 |
| 12.94    | -1237.60820 | -1238.74576 | -1238.74576 | -1238.94579 | -1239.17541 | -1239.18466 | -1239.37823 | -1239.21264 | -1239.43460 |
| 13.04    | -1237.60820 | -1238.74575 | -1238.74575 | -1238.94579 | -1239.17540 | -1239.18466 | -1239.37824 | -1239.21264 | -1239.43460 |
| 13.13    | -1237.60819 | -1238.74575 | -1238.74575 | -1238.94578 | -1239.17540 | -1239.18467 | -1239.37824 | -1239.21264 | -1239.43460 |
| 13.23    | -1237.60819 | -1238.74575 | -1238.74575 | -1238.94578 | -1239.17540 | -1239.18467 | -1239.37824 | -1239.21264 | -1239.43460 |
| 13.32    | -1237.60818 | -1238.74574 | -1238.74574 | -1238.94578 | -1239.17540 | -1239.18468 | -1239.37825 | -1239.21264 | -1239.43459 |
| 13.42    | -1237.60818 | -1238.74574 | -1238.74574 | -1238.94577 | -1239.17539 | -1239.18468 | -1239.37825 | -1239.21264 | -1239.43459 |
| 13.51    | -1237.60817 | -1238.74574 | -1238.74574 | -1238.94577 | -1239.17539 | -1239.18469 | -1239.37826 | -1239.21264 | -1239.43459 |
| 13.61    | -1237.60817 | -1238.74573 | -1238.74573 | -1238.94576 | -1239.17539 | -1239.18469 | -1239.37826 | -1239.21264 | -1239.43459 |



Table S9: The absolute energies in hartree of the potential energy curve of VSi in the  ${}^6\Sigma^+$  state with a SP-based wave function and nom-CPO active space.

| Distance | SP          | tpbe        | ftpbe       | trevpbe     | ftrevpbe    | tblyp       | ftblyp      | torelyp     | ftorelyp    |
|----------|-------------|-------------|-------------|-------------|-------------|-------------|-------------|-------------|-------------|
| 1.98     | -1235.30176 | -1236.55209 | -1236.74918 | -1236.75747 | -1236.95742 | -1236.96545 | -1237.15607 | -1237.03092 | -1237.24771 |
| 2.08     | -1235.73582 | -1236.98177 | -1237.17892 | -1237.18827 | -1237.38833 | -1237.39651 | -1237.58704 | -1237.45703 | -1237.67398 |
| 2.17     | -1236.07476 | -1237.31790 | -1237.51518 | -1237.52544 | -1237.72567 | -1237.73391 | -1237.92447 | -1237.79023 | -1238.00746 |
| 2.27     | -1236.34116 | -1237.58286 | -1237.78030 | -1237.79137 | -1237.99180 | -1238.00004 | -1238.19066 | -1238.05299 | -1238.27048 |
| 2.36     | -1236.55253 | -1237.79367 | -1237.99125 | -1238.00309 | -1238.20368 | -1238.21189 | -1238.40252 | -1238.26232 | -1238.48003 |
| 2.46     | -1236.72260 | -1237.96172 | -1238.15946 | -1238.17203 | -1238.37280 | -1238.38061 | -1238.57104 | -1238.42996 | -1238.64782 |
| 2.55     | -1236.86471 | -1238.08980 | -1238.29009 | -1238.30121 | -1238.50550 | -1238.50699 | -1238.69935 | -1238.55694 | -1238.78030 |
| 2.65     | -1236.98513 | -1238.20588 | -1238.40676 | -1238.41805 | -1238.62332 | -1238.62286 | -1238.81569 | -1238.67121 | -1238.89609 |
| 2.74     | -1237.08659 | -1238.30543 | -1238.50656 | -1238.51827 | -1238.72398 | -1238.72240 | -1238.91531 | -1238.76900 | -1238.99448 |
| 2.83     | -1237.17282 | -1238.39165 | -1238.59274 | -1238.60506 | -1238.81079 | -1238.80877 | -1239.00144 | -1238.85362 | -1239.07897 |
| 2.93     | -1237.24664 | -1238.46684 | -1238.66764 | -1238.68074 | -1238.88612 | -1238.88428 | -1239.07641 | -1238.92741 | -1239.15207 |
| 3.02     | -1237.31020 | -1238.53271 | -1238.73302 | -1238.74704 | -1238.95180 | -1238.95060 | -1239.14199 | -1238.99210 | -1239.21569 |
| 3.12     | -1237.36522 | -1238.59117 | -1238.79077 | -1238.80587 | -1239.00972 | -1239.00971 | -1239.20003 | -1239.04957 | -1239.27161 |
| 3.21     | -1237.41620 | -1238.64784 | -1238.84730 | -1238.86264 | -1239.06688 | -1239.06634 | -1239.25628 | -1239.10299 | -1239.32482 |
| 3.31     | -1237.45875 | -1238.68799 | -1238.88686 | -1238.90321 | -1239.10682 | -1239.10680 | -1239.29608 | -1239.14294 | -1239.36395 |
| 3.40     | -1237.49477 | -1238.72158 | -1238.91999 | -1238.93720 | -1239.14030 | -1239.14071 | -1239.32947 | -1239.17631 | -1239.39665 |
| 3.50     | -1237.52509 | -1238.74952 | -1238.94754 | -1238.96553 | -1239.16820 | -1239.16897 | -1239.35731 | -1239.20405 | -1239.42382 |
| 3.59     | -1237.55043 | -1238.77257 | -1238.97025 | -1238.98897 | -1239.19126 | -1239.19235 | -1239.38034 | -1239.22694 | -1239.44621 |
| 3.68     | -1237.57145 | -1238.79141 | -1238.98879 | -1239.00817 | -1239.21012 | -1239.21154 | -1239.39921 | -1239.24565 | -1239.46446 |
| 3.78     | -1237.58873 | -1238.80659 | -1239.00371 | -1239.02369 | -1239.22536 | -1239.22707 | -1239.41449 | -1239.26075 | -1239.47915 |
| 3.87     | -1237.60280 | -1238.81861 | -1239.01550 | -1239.03604 | -1239.23744 | -1239.23944 | -1239.42664 | -1239.27272 | -1239.49074 |
| 3.97     | -1237.61411 | -1238.82788 | -1239.02458 | -1239.04564 | -1239.24681 | -1239.24908 | -1239.43610 | -1239.28198 | -1239.49967 |
| 4.06     | -1237.62307 | -1238.83480 | -1239.03135 | -1239.05286 | -1239.25385 | -1239.25637 | -1239.44325 | -1239.28891 | -1239.50630 |
| 4.16     | -1237.63004 | -1238.83968 | -1239.03612 | -1239.05804 | -1239.25888 | -1239.26160 | -1239.44840 | -1239.29381 | -1239.51097 |
| 4.35     | -1237.63531 | -1238.84277 | -1239.03914 | -1239.06142 | -1239.26216 | -1239.26505 | -1239.45180 | -1239.29695 | -1239.51391 |
| 4.44     | -1237.63917 | -1238.84431 | -1239.04065 | -1239.06324 | -1239.26392 | -1239.26692 | -1239.45369 | -1239.29853 | -1239.51536 |
| 4.54     | -1237.64185 | -1238.84449 | -1239.04086 | -1239.06370 | -1239.26439 | -1239.26743 | -1239.45426 | -1239.29877 | -1239.51553 |
| 4.63     | -1237.64355 | -1238.84348 | -1239.03994 | -1239.06298 | -1239.26373 | -1239.26674 | -1239.45369 | -1239.29783 | -1239.51459 |
| 4.72     | -1237.64444 | -1238.84144 | -1239.03803 | -1239.06122 | -1239.26208 | -1239.26498 | -1239.45212 | -1239.29585 | -1239.51268 |
| 4.82     | -1237.64468 | -1238.83848 | -1239.03526 | -1239.05854 | -1239.25959 | -1239.26229 | -1239.44966 | -1239.29296 | -1239.50995 |
| 4.91     | -1237.64440 | -1238.83466 | -1239.03170 | -1239.05501 | -1239.25633 | -1239.25872 | -1239.44640 | -1239.28921 | -1239.50646 |
| 5.01     | -1237.64373 | -1238.82916 | -1239.02663 | -1239.04985 | -1239.25158 | -1239.25345 | -1239.44162 | -1239.28379 | -1239.50153 |
| 5.10     | -1237.64286 | -1238.82068 | -1239.01866 | -1239.04172 | -1239.24397 | -1239.24518 | -1239.43397 | -1239.27539 | -1239.49379 |
| 5.20     | -1237.64179 | -1238.81538 | -1239.01355 | -1239.03667 | -1239.23912 | -1239.24010 | -1239.42914 | -1239.27023 | -1239.48890 |
| 5.29     | -1237.64048 | -1238.81094 | -1239.00925 | -1239.03246 | -1239.23505 | -1239.23589 | -1239.42511 | -1239.26597 | -1239.48483 |
| 5.39     | -1237.63895 | -1238.80688 | -1239.00530 | -1239.02861 | -1239.23131 | -1239.23206 | -1239.42144 | -1239.26211 | -1239.48113 |
| 5.48     | -1237.63723 | -1238.80307 | -1239.00159 | -1239.02498 | -1239.22779 | -1239.22848 | -1239.41800 | -1239.25850 | -1239.47768 |
| 5.57     | -1237.63536 | -1238.79943 | -1238.99804 | -1239.02153 | -1239.22442 | -1239.22509 | -1239.41474 | -1239.25508 | -1239.47441 |
| 5.67     | -1237.63338 | -1238.79594 | -1238.99464 | -1239.01820 | -1239.22119 | -1239.22186 | -1239.41164 | -1239.25182 | -1239.47129 |
| 5.76     | -1237.63130 | -1238.79258 | -1238.99138 | -1239.01500 | -1239.21807 | -1239.21877 | -1239.40868 | -1239.24871 | -1239.46833 |
| 5.86     | -1237.62916 | -1238.78935 | -1238.98824 | -1239.01191 | -1239.21507 | -1239.21582 | -1239.40587 | -1239.24572 | -1239.46550 |
| 5.95     | -1237.62699 | -1238.78625 | -1238.98524 | -1239.00895 | -1239.21219 | -1239.21300 | -1239.40321 | -1239.24288 | -1239.46281 |
| 6.05     | -1237.62480 | -1238.78328 | -1238.98236 | -1239.00610 | -1239.20943 | -1239.21034 | -1239.40070 | -1239.24016 | -1239.46028 |
| 6.14     | -1237.62260 | -1238.78045 | -1238.97963 | -1239.00339 | -1239.20680 | -1239.20782 | -1239.39836 | -1239.23759 | -1239.45789 |
| 6.24     | -1237.62044 | -1238.77775 | -1238.97704 | -1239.00080 | -1239.20430 | -1239.20546 | -1239.39618 | -1239.23517 | -1239.45566 |
| 6.33     | -1237.61831 | -1238.77518 | -1238.97457 | -1238.99833 | -1239.20191 | -1239.20324 | -1239.39416 | -1239.23287 | -1239.45357 |
| 6.43     | -1237.61623 | -1238.77274 | -1238.97224 | -1238.99598 | -1239.19964 | -1239.20118 | -1239.39231 | -1239.23070 | -1239.45162 |
| 6.52     | -1237.61423 | -1238.77041 | -1238.97002 | -1238.99374 | -1239.19748 | -1239.19925 | -1239.39061 | -1239.22866 | -1239.44980 |
| 6.61     | -1237.61232 | -1238.76821 | -1238.96793 | -1238.99161 | -1239.19543 | -1239.19748 | -1239.38908 | -1239.22674 | -1239.44812 |
| 6.71     | -1237.61051 | -1238.76611 | -1238.96593 | -1238.98958 | -1239.19346 | -1239.19583 | -1239.38769 | -1239.22493 | -1239.44654 |
| 6.80     | -1237.60883 | -1238.76409 | -1238.96402 | -1238.98763 | -1239.19157 | -1239.19431 | -1239.38644 | -1239.22321 | -1239.44505 |
| 6.90     | -1237.60728 | -1238.76213 | -1238.96217 | -1238.98573 | -1239.18973 | -1239.19288 | -1239.38531 | -1239.22155 | -1239.44364 |

Table S9: The absolute energies in hartree of the potential energy curve of VSi in the  ${}^6\Sigma^+$  state with a SP-based wave function and nom-CPO active space.

| Distance | SP          | tpbe        | ftpb        | trevpbe     | ftrevpbe    | tblyp       | ftblyp      | torelyp     | ftorelyp    |
|----------|-------------|-------------|-------------|-------------|-------------|-------------|-------------|-------------|-------------|
| 6.99     | -1237.60590 | -1238.76022 | -1238.96037 | -1238.98387 | -1239.18792 | -1239.19153 | -1239.38426 | -1239.21994 | -1239.44227 |
| 7.09     | -1237.60468 | -1238.75837 | -1238.95862 | -1238.98207 | -1239.18618 | -1239.19026 | -1239.38328 | -1239.21839 | -1239.44094 |
| 7.18     | -1237.60364 | -1238.75661 | -1238.95696 | -1238.98036 | -1239.18454 | -1239.18906 | -1239.38235 | -1239.21693 | -1239.43969 |
| 7.28     | -1237.60275 | -1238.75499 | -1238.95543 | -1238.97880 | -1239.18304 | -1239.18795 | -1239.38146 | -1239.21560 | -1239.43853 |
| 7.37     | -1237.60198 | -1238.75353 | -1238.95405 | -1238.97739 | -1239.18170 | -1239.18694 | -1239.38062 | -1239.21441 | -1239.43747 |
| 7.46     | -1237.60133 | -1238.75224 | -1238.95281 | -1238.97616 | -1239.18051 | -1239.18603 | -1239.37984 | -1239.21337 | -1239.43653 |
| 7.56     | -1237.60076 | -1238.75108 | -1238.95169 | -1238.97506 | -1239.17946 | -1239.18520 | -1239.37911 | -1239.21244 | -1239.43568 |
| 7.65     | -1237.60027 | -1238.75005 | -1238.95069 | -1238.97409 | -1239.17851 | -1239.18446 | -1239.37844 | -1239.21163 | -1239.43491 |
| 7.75     | -1237.59983 | -1238.74912 | -1238.94978 | -1238.97322 | -1239.17766 | -1239.18379 | -1239.37782 | -1239.21091 | -1239.43423 |
| 7.84     | -1237.59944 | -1238.74828 | -1238.94895 | -1238.97245 | -1239.17690 | -1239.18319 | -1239.37725 | -1239.21027 | -1239.43362 |
| 7.94     | -1237.59909 | -1238.74752 | -1238.94820 | -1238.97175 | -1239.17621 | -1239.18264 | -1239.37674 | -1239.20971 | -1239.43307 |
| 8.03     | -1237.59877 | -1238.74683 | -1238.94752 | -1238.97112 | -1239.17559 | -1239.18215 | -1239.37627 | -1239.20920 | -1239.43257 |
| 8.13     | -1237.59849 | -1238.74620 | -1238.94689 | -1238.97055 | -1239.17502 | -1239.18170 | -1239.37583 | -1239.20876 | -1239.43214 |
| 8.22     | -1237.59823 | -1238.74563 | -1238.94632 | -1238.97004 | -1239.17451 | -1239.18129 | -1239.37543 | -1239.20837 | -1239.43175 |
| 8.31     | -1237.59800 | -1238.74512 | -1238.94580 | -1238.96958 | -1239.17405 | -1239.18092 | -1239.37508 | -1239.20803 | -1239.43140 |
| 8.41     | -1237.59779 | -1238.74465 | -1238.94533 | -1238.96916 | -1239.17363 | -1239.18060 | -1239.37475 | -1239.20773 | -1239.43109 |
| 8.50     | -1237.59760 | -1238.74422 | -1238.94490 | -1238.96879 | -1239.17325 | -1239.18030 | -1239.37445 | -1239.20746 | -1239.43082 |
| 8.60     | -1237.59742 | -1238.74383 | -1238.94450 | -1238.96846 | -1239.17291 | -1239.18004 | -1239.37418 | -1239.20724 | -1239.43059 |
| 8.69     | -1237.59726 | -1238.74348 | -1238.94414 | -1238.96816 | -1239.17260 | -1239.17979 | -1239.37394 | -1239.20704 | -1239.43038 |
| 8.79     | -1237.59712 | -1238.74316 | -1238.94382 | -1238.96789 | -1239.17233 | -1239.17958 | -1239.37372 | -1239.20688 | -1239.43020 |
| 8.88     | -1237.59698 | -1238.74287 | -1238.94351 | -1238.96765 | -1239.17208 | -1239.17938 | -1239.37352 | -1239.20673 | -1239.43004 |
| 8.98     | -1237.59686 | -1238.74260 | -1238.94324 | -1238.96744 | -1239.17185 | -1239.17921 | -1239.37333 | -1239.20661 | -1239.42990 |
| 9.07     | -1237.59675 | -1238.74236 | -1238.94299 | -1238.96724 | -1239.17165 | -1239.17905 | -1239.37317 | -1239.20650 | -1239.42978 |
| 9.17     | -1237.59665 | -1238.74214 | -1238.94276 | -1238.96707 | -1239.17147 | -1239.17891 | -1239.37302 | -1239.20642 | -1239.42968 |
| 9.26     | -1237.59655 | -1238.74194 | -1238.94255 | -1238.96692 | -1239.17130 | -1239.17879 | -1239.37288 | -1239.20635 | -1239.42959 |
| 9.35     | -1237.59647 | -1238.74177 | -1238.94237 | -1238.96678 | -1239.17116 | -1239.17868 | -1239.37276 | -1239.20629 | -1239.42952 |
| 9.45     | -1237.59639 | -1238.74161 | -1238.94220 | -1238.96667 | -1239.17103 | -1239.17858 | -1239.37266 | -1239.20624 | -1239.42946 |
| 9.54     | -1237.59631 | -1238.74146 | -1238.94204 | -1238.96656 | -1239.17091 | -1239.17849 | -1239.37256 | -1239.20621 | -1239.42941 |
| 9.64     | -1237.59624 | -1238.74133 | -1238.94190 | -1238.96647 | -1239.17081 | -1239.17842 | -1239.37247 | -1239.20618 | -1239.42937 |
| 9.73     | -1237.59618 | -1238.74121 | -1238.94178 | -1238.96639 | -1239.17072 | -1239.17835 | -1239.37240 | -1239.20616 | -1239.42933 |
| 9.83     | -1237.59613 | -1238.74110 | -1238.94166 | -1238.96632 | -1239.17064 | -1239.17829 | -1239.37233 | -1239.20615 | -1239.42930 |
| 9.92     | -1237.59607 | -1238.74100 | -1238.94155 | -1238.96626 | -1239.17056 | -1239.17824 | -1239.37227 | -1239.20614 | -1239.42928 |
| 10.02    | -1237.59602 | -1238.74092 | -1238.94146 | -1238.96620 | -1239.17050 | -1239.17820 | -1239.37221 | -1239.20614 | -1239.42926 |
| 10.11    | -1237.59598 | -1238.74083 | -1238.94137 | -1238.96615 | -1239.17044 | -1239.17816 | -1239.37217 | -1239.20614 | -1239.42924 |
| 10.20    | -1237.59594 | -1238.74076 | -1238.94128 | -1238.96611 | -1239.17038 | -1239.17813 | -1239.37212 | -1239.20614 | -1239.42923 |
| 10.30    | -1237.59590 | -1238.74070 | -1238.94121 | -1238.96607 | -1239.17033 | -1239.17811 | -1239.37209 | -1239.20615 | -1239.42922 |
| 10.39    | -1237.59586 | -1238.74064 | -1238.94114 | -1238.96604 | -1239.17029 | -1239.17809 | -1239.37206 | -1239.20616 | -1239.42921 |
| 10.49    | -1237.59583 | -1238.74059 | -1238.94109 | -1238.96601 | -1239.17026 | -1239.17807 | -1239.37203 | -1239.20617 | -1239.42921 |
| 10.58    | -1237.59580 | -1238.74054 | -1238.94103 | -1238.96599 | -1239.17023 | -1239.17805 | -1239.37201 | -1239.20618 | -1239.42921 |
| 10.68    | -1237.59577 | -1238.74050 | -1238.94099 | -1238.96597 | -1239.17020 | -1239.17804 | -1239.37199 | -1239.20619 | -1239.42921 |
| 10.77    | -1237.59574 | -1238.74046 | -1238.94094 | -1238.96596 | -1239.17018 | -1239.17803 | -1239.37198 | -1239.20621 | -1239.42921 |
| 10.87    | -1237.59572 | -1238.74043 | -1238.94090 | -1238.96594 | -1239.17016 | -1239.17803 | -1239.37196 | -1239.20622 | -1239.42921 |
| 10.96    | -1237.59570 | -1238.74039 | -1238.94086 | -1238.96593 | -1239.17014 | -1239.17802 | -1239.37195 | -1239.20623 | -1239.42921 |
| 11.05    | -1237.59567 | -1238.74036 | -1238.94083 | -1238.96592 | -1239.17012 | -1239.17802 | -1239.37194 | -1239.20624 | -1239.42921 |
| 11.15    | -1237.59565 | -1238.74034 | -1238.94080 | -1238.96591 | -1239.17010 | -1239.17802 | -1239.37193 | -1239.20625 | -1239.42921 |
| 11.24    | -1237.59563 | -1238.74031 | -1238.94077 | -1238.96590 | -1239.17008 | -1239.17802 | -1239.37193 | -1239.20626 | -1239.42921 |
| 11.34    | -1237.59562 | -1238.74029 | -1238.94074 | -1238.96589 | -1239.17006 | -1239.17802 | -1239.37193 | -1239.20627 | -1239.42921 |
| 11.43    | -1237.59560 | -1238.74027 | -1238.94071 | -1238.96588 | -1239.17005 | -1239.17803 | -1239.37193 | -1239.20629 | -1239.42921 |
| 11.53    | -1237.59558 | -1238.74025 | -1238.94069 | -1238.96588 | -1239.17004 | -1239.17803 | -1239.37193 | -1239.20630 | -1239.42921 |
| 11.62    | -1237.59557 | -1238.74023 | -1238.94067 | -1238.96587 | -1239.17003 | -1239.17804 | -1239.37193 | -1239.20631 | -1239.42921 |
| 11.72    | -1237.59556 | -1238.74022 | -1238.94065 | -1238.96587 | -1239.17002 | -1239.17804 | -1239.37193 | -1239.20632 | -1239.42921 |
| 11.81    | -1237.59554 | -1238.74021 | -1238.94064 | -1238.96587 | -1239.17002 | -1239.17805 | -1239.37193 | -1239.20633 | -1239.42921 |



Table S9: The absolute energies in hartree of the potential energy curve of VSi in the  ${}^6\Sigma^+$  state with a SP-based wave function and nom-CPO active space.

| Distance | SP          | tpbe        | ftpbe       | trevpbe     | ftrevpbe    | tblyp       | ftblyp      | torelyp     | ftorelyp    |
|----------|-------------|-------------|-------------|-------------|-------------|-------------|-------------|-------------|-------------|
| 16.82    | -1237.59532 | -1238.74006 | -1238.94045 | -1238.96584 | -1239.16991 | -1239.17828 | -1239.37193 | -1239.20641 | -1239.42918 |
| 16.91    | -1237.59532 | -1238.74006 | -1238.94045 | -1238.96584 | -1239.16992 | -1239.17828 | -1239.37193 | -1239.20641 | -1239.42919 |
| 17.01    | -1237.59532 | -1238.74006 | -1238.94045 | -1238.96584 | -1239.16992 | -1239.17828 | -1239.37193 | -1239.20641 | -1239.42919 |
| 17.10    | -1237.59532 | -1238.74007 | -1238.94045 | -1238.96584 | -1239.16992 | -1239.17828 | -1239.37193 | -1239.20641 | -1239.42919 |
| 17.20    | -1237.59532 | -1238.74007 | -1238.94045 | -1238.96584 | -1239.16992 | -1239.17829 | -1239.37193 | -1239.20642 | -1239.42919 |
| 17.29    | -1237.59532 | -1238.74007 | -1238.94045 | -1238.96584 | -1239.16992 | -1239.17829 | -1239.37193 | -1239.20642 | -1239.42919 |
| 17.39    | -1237.59532 | -1238.74007 | -1238.94045 | -1238.96584 | -1239.16992 | -1239.17829 | -1239.37193 | -1239.20641 | -1239.42919 |
| 17.48    | -1237.59532 | -1238.74006 | -1238.94045 | -1238.96584 | -1239.16992 | -1239.17829 | -1239.37193 | -1239.20641 | -1239.42919 |
| 17.57    | -1237.59532 | -1238.74006 | -1238.94045 | -1238.96584 | -1239.16992 | -1239.17829 | -1239.37193 | -1239.20641 | -1239.42919 |
| 17.67    | -1237.59532 | -1238.74006 | -1238.94045 | -1238.96584 | -1239.16991 | -1239.17829 | -1239.37193 | -1239.20641 | -1239.42918 |
| 17.76    | -1237.59532 | -1238.74006 | -1238.94045 | -1238.96584 | -1239.16991 | -1239.17829 | -1239.37193 | -1239.20641 | -1239.42918 |
| 17.86    | -1237.59531 | -1238.74006 | -1238.94045 | -1238.96584 | -1239.16991 | -1239.17829 | -1239.37193 | -1239.20641 | -1239.42918 |
| 17.95    | -1237.59531 | -1238.74006 | -1238.94045 | -1238.96584 | -1239.16991 | -1239.17829 | -1239.37193 | -1239.20641 | -1239.42918 |
| 18.05    | -1237.59531 | -1238.74006 | -1238.94045 | -1238.96584 | -1239.16991 | -1239.17829 | -1239.37193 | -1239.20641 | -1239.42918 |

Table S10: The absolute energies in hartree of the potential energy curve of VSi in the  ${}^2\Sigma^+$  state with a SP-based wave function and nom-CPO active space.

| Distance | SP          | tpbe        | ftpbe       | trevpbe     | ftrevpbe    | tblyp       | ftblyp      | torelyp     | ftorelyp    |
|----------|-------------|-------------|-------------|-------------|-------------|-------------|-------------|-------------|-------------|
| 1.98     | -1235.49398 | -1236.75560 | -1236.96452 | -1236.96443 | -1237.17374 | -1237.17019 | -1237.17019 | -1237.23379 | -1237.46445 |
| 2.08     | -1235.91926 | -1237.17342 | -1237.38147 | -1237.38341 | -1237.59184 | -1237.58887 | -1237.58887 | -1237.64839 | -1237.87807 |
| 2.17     | -1236.24875 | -1237.49740 | -1237.70459 | -1237.70847 | -1237.91605 | -1237.91973 | -1237.91973 | -1237.96984 | -1238.19856 |
| 2.27     | -1236.52305 | -1237.76754 | -1237.97170 | -1237.97826 | -1238.18269 | -1238.18307 | -1238.18307 | -1238.23924 | -1238.46418 |
| 2.36     | -1236.73328 | -1237.97435 | -1238.17764 | -1238.18601 | -1238.38962 | -1238.39012 | -1238.39012 | -1238.44436 | -1238.66830 |
| 2.46     | -1236.89913 | -1238.13782 | -1238.34034 | -1238.35034 | -1238.55327 | -1238.55394 | -1238.55394 | -1238.60642 | -1238.82953 |
| 2.55     | -1237.03076 | -1238.26814 | -1238.46991 | -1238.48147 | -1238.68375 | -1238.68471 | -1238.68471 | -1238.73563 | -1238.95800 |
| 2.65     | -1237.13715 | -1238.37417 | -1238.57497 | -1238.58810 | -1238.79056 | -1238.79113 | -1238.79113 | -1238.84073 | -1239.06492 |
| 2.74     | -1237.22502 | -1238.45951 | -1238.66034 | -1238.67433 | -1238.87696 | -1238.87662 | -1238.87662 | -1238.92545 | -1239.14990 |
| 2.83     | -1237.29692 | -1238.53102 | -1238.73188 | -1238.74668 | -1238.94944 | -1238.94832 | -1238.94832 | -1238.99663 | -1239.22131 |
| 2.93     | -1237.35593 | -1238.59121 | -1238.79195 | -1238.80763 | -1239.01028 | -1239.00867 | -1239.00867 | -1239.05669 | -1239.28121 |
| 3.02     | -1237.40450 | -1238.64232 | -1238.84283 | -1238.85947 | -1239.06181 | -1239.05993 | -1239.05993 | -1239.10796 | -1239.33200 |
| 3.12     | -1237.45009 | -1238.68333 | -1238.88398 | -1238.90151 | -1239.10383 | -1239.10056 | -1239.10056 | -1239.14956 | -1239.37328 |
| 3.21     | -1237.48635 | -1238.71842 | -1238.91897 | -1238.93745 | -1239.13948 | -1239.13549 | -1239.13549 | -1239.18471 | -1239.40742 |
| 3.31     | -1237.51710 | -1238.74667 | -1238.94708 | -1238.96633 | -1239.16808 | -1239.16382 | -1239.16382 | -1239.21259 | -1239.43440 |
| 3.40     | -1237.54290 | -1238.76931 | -1238.96969 | -1238.98938 | -1239.19110 | -1239.18677 | -1239.18677 | -1239.23458 | -1239.45591 |
| 3.50     | -1237.56436 | -1238.78730 | -1238.98768 | -1239.00767 | -1239.20944 | -1239.20523 | -1239.20523 | -1239.25179 | -1239.47285 |
| 3.59     | -1237.58204 | -1238.80138 | -1239.00175 | -1239.02196 | -1239.22384 | -1239.21985 | -1239.21985 | -1239.26504 | -1239.48595 |
| 3.68     | -1237.59651 | -1238.81214 | -1239.01251 | -1239.03288 | -1239.23492 | -1239.23119 | -1239.23119 | -1239.27494 | -1239.49579 |
| 3.78     | -1237.60828 | -1238.82009 | -1239.02048 | -1239.04094 | -1239.24319 | -1239.23973 | -1239.23973 | -1239.28204 | -1239.50288 |
| 3.87     | -1237.61781 | -1238.82564 | -1239.02607 | -1239.04659 | -1239.24911 | -1239.24586 | -1239.24586 | -1239.28674 | -1239.50764 |
| 3.97     | -1237.62550 | -1238.82920 | -1239.02971 | -1239.05021 | -1239.25307 | -1239.24995 | -1239.24995 | -1239.28945 | -1239.51050 |
| 4.06     | -1237.63170 | -1238.83113 | -1239.03176 | -1239.05220 | -1239.25546 | -1239.25238 | -1239.25238 | -1239.29057 | -1239.51184 |
| 4.16     | -1237.63667 | -1238.83180 | -1239.03257 | -1239.05292 | -1239.25662 | -1239.25347 | -1239.25347 | -1239.29048 | -1239.51204 |
| 4.35     | -1237.64065 | -1238.83151 | -1239.03243 | -1239.05270 | -1239.25684 | -1239.25355 | -1239.25355 | -1239.28952 | -1239.51140 |
| 4.44     | -1237.64377 | -1238.83055 | -1239.03159 | -1239.05182 | -1239.25635 | -1239.25290 | -1239.25290 | -1239.28799 | -1239.51016 |
| 4.54     | -1237.64618 | -1238.82907 | -1239.03019 | -1239.05043 | -1239.25530 | -1239.25172 | -1239.25172 | -1239.28604 | -1239.50848 |
| 4.63     | -1237.64798 | -1238.82716 | -1239.02831 | -1239.04862 | -1239.25374 | -1239.25007 | -1239.25007 | -1239.28376 | -1239.50639 |
| 4.72     | -1237.64923 | -1238.82504 | -1239.02618 | -1239.04663 | -1239.25190 | -1239.24820 | -1239.24820 | -1239.28138 | -1239.50412 |
| 4.82     | -1237.64998 | -1238.82285 | -1239.02395 | -1239.04457 | -1239.24994 | -1239.24626 | -1239.24626 | -1239.27904 | -1239.50181 |
| 4.91     | -1237.65026 | -1238.82059 | -1239.02163 | -1239.04246 | -1239.24787 | -1239.24425 | -1239.24425 | -1239.27670 | -1239.49949 |
| 5.01     | -1237.65012 | -1238.81826 | -1239.01925 | -1239.04028 | -1239.24572 | -1239.24216 | -1239.24216 | -1239.27436 | -1239.49711 |

Table S10: The absolute energies in hartree of the potential energy curve of VSi in the  $^2\Sigma^+$  state with a SP-based wave function and nom-CPO active space.

| Distance | SP          | tpbe        | ftpb        | trevpbe     | ftrevpbe    | tblyp       | ftblyp      | torelyp     | ftorelyp    |
|----------|-------------|-------------|-------------|-------------|-------------|-------------|-------------|-------------|-------------|
| 5.10     | -1237.64963 | -1238.81589 | -1239.01680 | -1239.03805 | -1239.24347 | -1239.24004 | -1239.24004 | -1239.27200 | -1239.49469 |
| 5.20     | -1237.64881 | -1238.81345 | -1239.01427 | -1239.03574 | -1239.24112 | -1239.23785 | -1239.23785 | -1239.26962 | -1239.49223 |
| 5.29     | -1237.64773 | -1238.81095 | -1239.01168 | -1239.03339 | -1239.23871 | -1239.23564 | -1239.23564 | -1239.26721 | -1239.48974 |
| 5.39     | -1237.64643 | -1238.80844 | -1239.00907 | -1239.03100 | -1239.23626 | -1239.23341 | -1239.23341 | -1239.26480 | -1239.48724 |
| 5.48     | -1237.64495 | -1238.80591 | -1239.00645 | -1239.02860 | -1239.23377 | -1239.23117 | -1239.23117 | -1239.26240 | -1239.48472 |
| 5.57     | -1237.64332 | -1238.80339 | -1239.00382 | -1239.02620 | -1239.23127 | -1239.22894 | -1239.22894 | -1239.26002 | -1239.48220 |
| 5.67     | -1237.64158 | -1238.80090 | -1239.00121 | -1239.02382 | -1239.22877 | -1239.22675 | -1239.22675 | -1239.25768 | -1239.47974 |
| 5.76     | -1237.63975 | -1238.79844 | -1238.99865 | -1239.02147 | -1239.22631 | -1239.22461 | -1239.22461 | -1239.25538 | -1239.47733 |
| 5.86     | -1237.63787 | -1238.79602 | -1238.99613 | -1239.01915 | -1239.22388 | -1239.22252 | -1239.22252 | -1239.25313 | -1239.47497 |
| 5.95     | -1237.63596 | -1238.79366 | -1238.99366 | -1239.01689 | -1239.22148 | -1239.22050 | -1239.22050 | -1239.25096 | -1239.47266 |
| 6.05     | -1237.63404 | -1238.79138 | -1238.99127 | -1239.01469 | -1239.21914 | -1239.21857 | -1239.21857 | -1239.24886 | -1239.47043 |
| 6.14     | -1237.63213 | -1238.78916 | -1238.98895 | -1239.01256 | -1239.21687 | -1239.21672 | -1239.21672 | -1239.24683 | -1239.46830 |
| 6.24     | -1237.63024 | -1238.78702 | -1238.98672 | -1239.01049 | -1239.21468 | -1239.21495 | -1239.21495 | -1239.24489 | -1239.46628 |
| 6.33     | -1237.62841 | -1238.78495 | -1238.98458 | -1239.00849 | -1239.21257 | -1239.21329 | -1239.21329 | -1239.24303 | -1239.46434 |
| 6.43     | -1237.62662 | -1238.78296 | -1238.98253 | -1239.00657 | -1239.21054 | -1239.21172 | -1239.21172 | -1239.24126 | -1239.46251 |
| 6.52     | -1237.62491 | -1238.78104 | -1238.98056 | -1239.00471 | -1239.20859 | -1239.21022 | -1239.21022 | -1239.23956 | -1239.46077 |
| 6.61     | -1237.62329 | -1238.77919 | -1238.97867 | -1239.00292 | -1239.20671 | -1239.20882 | -1239.20882 | -1239.23795 | -1239.45913 |
| 6.71     | -1237.62174 | -1238.77740 | -1238.97687 | -1239.00118 | -1239.20492 | -1239.20748 | -1239.20748 | -1239.23640 | -1239.45759 |
| 6.80     | -1237.62030 | -1238.77567 | -1238.97514 | -1238.99951 | -1239.20319 | -1239.20621 | -1239.20621 | -1239.23492 | -1239.45613 |
| 6.90     | -1237.61895 | -1238.77399 | -1238.97346 | -1238.99788 | -1239.20153 | -1239.20501 | -1239.20501 | -1239.23349 | -1239.45473 |
| 6.99     | -1237.61770 | -1238.77236 | -1238.97185 | -1238.99631 | -1239.19992 | -1239.20384 | -1239.20384 | -1239.23212 | -1239.45339 |
| 7.09     | -1237.61655 | -1238.77079 | -1238.97029 | -1238.99478 | -1239.19837 | -1239.20272 | -1239.20272 | -1239.23080 | -1239.45210 |
| 7.18     | -1237.61549 | -1238.76926 | -1238.96879 | -1238.99331 | -1239.19688 | -1239.20164 | -1239.20164 | -1239.22954 | -1239.45087 |
| 7.28     | -1237.61452 | -1238.76780 | -1238.96735 | -1238.99190 | -1239.19546 | -1239.20060 | -1239.20060 | -1239.22833 | -1239.44970 |
| 7.37     | -1237.61364 | -1238.76640 | -1238.96598 | -1238.99056 | -1239.19410 | -1239.19961 | -1239.19961 | -1239.22719 | -1239.44859 |
| 7.46     | -1237.61284 | -1238.76507 | -1238.96467 | -1238.98929 | -1239.19282 | -1239.19866 | -1239.19866 | -1239.22611 | -1239.44754 |
| 7.56     | -1237.61211 | -1238.76381 | -1238.96344 | -1238.98809 | -1239.19161 | -1239.19776 | -1239.19776 | -1239.22510 | -1239.44655 |
| 7.65     | -1237.61145 | -1238.76262 | -1238.96227 | -1238.98696 | -1239.19048 | -1239.19691 | -1239.19691 | -1239.22416 | -1239.44563 |
| 7.75     | -1237.61085 | -1238.76150 | -1238.96117 | -1238.98590 | -1239.18941 | -1239.19610 | -1239.19610 | -1239.22329 | -1239.44476 |
| 7.84     | -1237.61031 | -1238.76046 | -1238.96014 | -1238.98492 | -1239.18842 | -1239.19534 | -1239.19534 | -1239.22248 | -1239.44395 |
| 7.94     | -1237.60983 | -1238.75948 | -1238.95918 | -1238.98400 | -1239.18750 | -1239.19464 | -1239.19464 | -1239.22174 | -1239.44321 |
| 8.03     | -1237.60938 | -1238.75858 | -1238.95829 | -1238.98316 | -1239.18665 | -1239.19398 | -1239.19398 | -1239.22106 | -1239.44253 |
| 8.13     | -1237.60898 | -1238.75775 | -1238.95747 | -1238.98239 | -1239.18587 | -1239.19337 | -1239.19337 | -1239.22045 | -1239.44191 |
| 8.22     | -1237.60862 | -1238.75699 | -1238.95672 | -1238.98169 | -1239.18516 | -1239.19282 | -1239.19282 | -1239.21990 | -1239.44135 |
| 8.31     | -1237.60830 | -1238.75629 | -1238.95602 | -1238.98105 | -1239.18451 | -1239.19231 | -1239.19231 | -1239.21941 | -1239.44085 |
| 8.41     | -1237.60800 | -1238.75565 | -1238.95539 | -1238.98047 | -1239.18392 | -1239.19184 | -1239.19184 | -1239.21897 | -1239.44040 |
| 8.50     | -1237.60773 | -1238.75506 | -1238.95480 | -1238.97994 | -1239.18338 | -1239.19142 | -1239.19142 | -1239.21858 | -1239.43999 |
| 8.60     | -1237.60749 | -1238.75453 | -1238.95428 | -1238.97946 | -1239.18290 | -1239.19103 | -1239.19103 | -1239.21824 | -1239.43963 |
| 8.69     | -1237.60727 | -1238.75404 | -1238.95379 | -1238.97903 | -1239.18246 | -1239.19068 | -1239.19068 | -1239.21793 | -1239.43931 |
| 8.79     | -1237.60707 | -1238.75360 | -1238.95335 | -1238.97865 | -1239.18206 | -1239.19036 | -1239.19036 | -1239.21767 | -1239.43902 |
| 8.88     | -1237.60689 | -1238.75319 | -1238.95295 | -1238.97830 | -1239.18170 | -1239.19008 | -1239.19008 | -1239.21743 | -1239.43877 |
| 8.98     | -1237.60673 | -1238.75283 | -1238.95258 | -1238.97799 | -1239.18138 | -1239.18982 | -1239.18982 | -1239.21723 | -1239.43855 |
| 9.07     | -1237.60658 | -1238.75250 | -1238.95225 | -1238.97771 | -1239.18109 | -1239.18959 | -1239.18959 | -1239.21706 | -1239.43836 |
| 9.17     | -1237.60645 | -1238.75221 | -1238.95196 | -1238.97746 | -1239.18083 | -1239.18938 | -1239.18938 | -1239.21691 | -1239.43820 |
| 9.26     | -1237.60632 | -1238.75194 | -1238.95169 | -1238.97725 | -1239.18061 | -1239.18920 | -1239.18920 | -1239.21678 | -1239.43806 |
| 9.35     | -1237.60621 | -1238.75171 | -1238.95145 | -1238.97706 | -1239.18041 | -1239.18904 | -1239.18904 | -1239.21668 | -1239.43794 |
| 9.45     | -1237.60611 | -1238.75149 | -1238.95123 | -1238.97689 | -1239.18023 | -1239.18890 | -1239.18890 | -1239.21659 | -1239.43784 |
| 9.54     | -1237.60602 | -1238.75130 | -1238.95104 | -1238.97674 | -1239.18007 | -1239.18877 | -1239.18877 | -1239.21652 | -1239.43776 |
| 9.64     | -1237.60593 | -1238.75112 | -1238.95086 | -1238.97660 | -1239.17993 | -1239.18865 | -1239.18865 | -1239.21646 | -1239.43768 |
| 9.73     | -1237.60585 | -1238.75096 | -1238.95070 | -1238.97648 | -1239.17980 | -1239.18856 | -1239.18856 | -1239.21641 | -1239.43762 |
| 9.83     | -1237.60578 | -1238.75082 | -1238.95055 | -1238.97637 | -1239.17968 | -1239.18846 | -1239.18846 | -1239.21637 | -1239.43757 |
| 9.92     | -1237.60572 | -1238.75069 | -1238.95041 | -1238.97628 | -1239.17958 | -1239.18838 | -1239.18838 | -1239.21634 | -1239.43752 |



Table S10: The absolute energies in hartree of the potential energy curve of VSi in the  $^2\Sigma^+$  state with a SP-based wave function and nom-CPO active space.

| Distance | SP          | tpbe        | ftpbe       | trepbe      | ftrepbe     | tblyp       | ftblyp      | torelyp     | ftorelyp    |
|----------|-------------|-------------|-------------|-------------|-------------|-------------|-------------|-------------|-------------|
| 10.02    | -1237.60566 | -1238.75057 | -1238.95029 | -1238.97620 | -1239.17949 | -1239.18831 | -1239.18831 | -1239.21631 | -1239.43748 |
| 10.11    | -1237.60560 | -1238.75046 | -1238.95018 | -1238.97612 | -1239.17940 | -1239.18825 | -1239.18825 | -1239.21629 | -1239.43744 |
| 10.20    | -1237.60556 | -1238.75037 | -1238.95008 | -1238.97606 | -1239.17933 | -1239.18820 | -1239.18820 | -1239.21628 | -1239.43742 |
| 10.30    | -1237.60551 | -1238.75028 | -1238.94999 | -1238.97600 | -1239.17927 | -1239.18815 | -1239.18815 | -1239.21627 | -1239.43740 |
| 10.39    | -1237.60547 | -1238.75021 | -1238.94991 | -1238.97596 | -1239.17922 | -1239.18812 | -1239.18812 | -1239.21627 | -1239.43739 |
| 10.49    | -1237.60543 | -1238.75014 | -1238.94984 | -1238.97591 | -1239.17917 | -1239.18809 | -1239.18809 | -1239.21626 | -1239.43737 |
| 10.58    | -1237.60539 | -1238.75008 | -1238.94977 | -1238.97588 | -1239.17912 | -1239.18806 | -1239.18806 | -1239.21626 | -1239.43737 |
| 10.68    | -1237.60536 | -1238.75002 | -1238.94972 | -1238.97585 | -1239.17909 | -1239.18803 | -1239.18803 | -1239.21627 | -1239.43736 |
| 10.77    | -1237.60533 | -1238.74997 | -1238.94966 | -1238.97582 | -1239.17905 | -1239.18801 | -1239.18801 | -1239.21627 | -1239.43736 |
| 10.87    | -1237.60530 | -1238.74992 | -1238.94961 | -1238.97579 | -1239.17902 | -1239.18799 | -1239.18799 | -1239.21628 | -1239.43735 |
| 10.96    | -1237.60528 | -1238.74988 | -1238.94957 | -1238.97577 | -1239.17899 | -1239.18798 | -1239.18798 | -1239.21628 | -1239.43735 |
| 11.05    | -1237.60525 | -1238.74984 | -1238.94952 | -1238.97575 | -1239.17897 | -1239.18796 | -1239.18796 | -1239.21628 | -1239.43734 |
| 11.15    | -1237.60523 | -1238.74980 | -1238.94948 | -1238.97573 | -1239.17894 | -1239.18795 | -1239.18795 | -1239.21629 | -1239.43734 |
| 11.24    | -1237.60521 | -1238.74977 | -1238.94944 | -1238.97571 | -1239.17892 | -1239.18795 | -1239.18795 | -1239.21629 | -1239.43733 |
| 11.34    | -1237.60519 | -1238.74974 | -1238.94941 | -1238.97569 | -1239.17890 | -1239.18794 | -1239.18794 | -1239.21630 | -1239.43733 |
| 11.43    | -1237.60517 | -1238.74971 | -1238.94938 | -1238.97568 | -1239.17888 | -1239.18794 | -1239.18794 | -1239.21630 | -1239.43733 |
| 11.53    | -1237.60516 | -1238.74969 | -1238.94935 | -1238.97567 | -1239.17886 | -1239.18794 | -1239.18794 | -1239.21631 | -1239.43733 |
| 11.62    | -1237.60514 | -1238.74967 | -1238.94933 | -1238.97566 | -1239.17885 | -1239.18794 | -1239.18794 | -1239.21632 | -1239.43733 |
| 11.72    | -1237.60513 | -1238.74965 | -1238.94931 | -1238.97566 | -1239.17884 | -1239.18794 | -1239.18794 | -1239.21633 | -1239.43733 |
| 11.81    | -1237.60512 | -1238.74963 | -1238.94929 | -1238.97565 | -1239.17883 | -1239.18794 | -1239.18794 | -1239.21634 | -1239.43734 |
| 11.91    | -1237.60510 | -1238.74962 | -1238.94927 | -1238.97565 | -1239.17882 | -1239.18794 | -1239.18794 | -1239.21634 | -1239.43734 |
| 12.00    | -1237.60509 | -1238.74960 | -1238.94926 | -1238.97564 | -1239.17881 | -1239.18794 | -1239.18794 | -1239.21635 | -1239.43734 |
| 12.09    | -1237.60508 | -1238.74959 | -1238.94924 | -1238.97564 | -1239.17881 | -1239.18795 | -1239.18795 | -1239.21635 | -1239.43734 |
| 12.19    | -1237.60507 | -1238.74957 | -1238.94923 | -1238.97563 | -1239.17880 | -1239.18795 | -1239.18795 | -1239.21635 | -1239.43734 |
| 12.28    | -1237.60506 | -1238.74956 | -1238.94921 | -1238.97563 | -1239.17879 | -1239.18795 | -1239.18795 | -1239.21636 | -1239.43734 |
| 12.38    | -1237.60505 | -1238.74955 | -1238.94920 | -1238.97562 | -1239.17878 | -1239.18796 | -1239.18796 | -1239.21636 | -1239.43733 |
| 12.47    | -1237.60504 | -1238.74954 | -1238.94919 | -1238.97561 | -1239.17877 | -1239.18796 | -1239.18796 | -1239.21636 | -1239.43733 |
| 12.57    | -1237.60504 | -1238.74952 | -1238.94917 | -1238.97561 | -1239.17877 | -1239.18796 | -1239.18796 | -1239.21636 | -1239.43733 |
| 12.66    | -1237.60503 | -1238.74951 | -1238.94916 | -1238.97560 | -1239.17875 | -1239.18797 | -1239.18797 | -1239.21636 | -1239.43732 |
| 12.76    | -1237.60502 | -1238.74950 | -1238.94915 | -1238.97560 | -1239.17875 | -1239.18797 | -1239.18797 | -1239.21636 | -1239.43732 |
| 12.85    | -1237.60502 | -1238.74949 | -1238.94914 | -1238.97559 | -1239.17874 | -1239.18797 | -1239.18797 | -1239.21637 | -1239.43732 |
| 12.94    | -1237.60501 | -1238.74949 | -1238.94913 | -1238.97559 | -1239.17874 | -1239.18798 | -1239.18798 | -1239.21637 | -1239.43733 |
| 13.04    | -1237.60500 | -1238.74948 | -1238.94912 | -1238.97559 | -1239.17874 | -1239.18798 | -1239.18798 | -1239.21637 | -1239.43732 |
| 13.13    | -1237.60500 | -1238.74947 | -1238.94912 | -1238.97559 | -1239.17873 | -1239.18799 | -1239.18799 | -1239.21637 | -1239.43732 |
| 13.23    | -1237.60499 | -1238.74947 | -1238.94911 | -1238.97559 | -1239.17873 | -1239.18799 | -1239.18799 | -1239.21638 | -1239.43732 |
| 13.32    | -1237.60499 | -1238.74947 | -1238.94911 | -1238.97558 | -1239.17873 | -1239.18800 | -1239.18800 | -1239.21638 | -1239.43732 |
| 13.42    | -1237.60498 | -1238.74946 | -1238.94910 | -1238.97558 | -1239.17872 | -1239.18800 | -1239.18800 | -1239.21638 | -1239.43732 |
| 13.51    | -1237.60498 | -1238.74946 | -1238.94910 | -1238.97558 | -1239.17872 | -1239.18801 | -1239.18801 | -1239.21638 | -1239.43732 |
| 13.61    | -1237.60497 | -1238.74945 | -1238.94909 | -1238.97558 | -1239.17872 | -1239.18801 | -1239.18801 | -1239.21638 | -1239.43732 |
| 13.70    | -1237.60497 | -1238.74945 | -1238.94909 | -1238.97558 | -1239.17872 | -1239.18802 | -1239.18802 | -1239.21638 | -1239.43732 |
| 13.80    | -1237.60497 | -1238.74944 | -1238.94909 | -1238.97557 | -1239.17871 | -1239.18802 | -1239.18802 | -1239.21638 | -1239.43732 |
| 13.89    | -1237.60496 | -1238.74944 | -1238.94908 | -1238.97557 | -1239.17871 | -1239.18802 | -1239.18802 | -1239.21638 | -1239.43731 |
| 13.98    | -1237.60496 | -1238.74944 | -1238.94908 | -1238.97557 | -1239.17871 | -1239.18803 | -1239.18803 | -1239.21638 | -1239.43731 |
| 14.08    | -1237.60495 | -1238.74943 | -1238.94907 | -1238.97557 | -1239.17870 | -1239.18803 | -1239.18803 | -1239.21638 | -1239.43731 |
| 14.17    | -1237.60495 | -1238.74943 | -1238.94907 | -1238.97557 | -1239.17870 | -1239.18803 | -1239.18803 | -1239.21638 | -1239.43731 |
| 14.27    | -1237.60495 | -1238.74942 | -1238.94906 | -1238.97556 | -1239.17870 | -1239.18804 | -1239.18804 | -1239.21638 | -1239.43731 |
| 14.36    | -1237.60495 | -1238.74942 | -1238.94906 | -1238.97556 | -1239.17870 | -1239.18804 | -1239.18804 | -1239.21638 | -1239.43731 |
| 14.46    | -1237.60494 | -1238.74942 | -1238.94906 | -1238.97556 | -1239.17869 | -1239.18804 | -1239.18804 | -1239.21638 | -1239.43731 |
| 14.55    | -1237.60494 | -1238.74942 | -1238.94906 | -1238.97556 | -1239.17869 | -1239.18805 | -1239.18805 | -1239.21638 | -1239.43731 |
| 14.65    | -1237.60494 | -1238.74941 | -1238.94905 | -1238.97556 | -1239.17869 | -1239.18805 | -1239.18805 | -1239.21638 | -1239.43731 |
| 14.74    | -1237.60493 | -1238.74941 | -1238.94905 | -1238.97556 | -1239.17869 | -1239.18805 | -1239.18805 | -1239.21638 | -1239.43731 |
| 14.83    | -1237.60493 | -1238.74941 | -1238.94905 | -1238.97556 | -1239.17869 | -1239.18806 | -1239.18806 | -1239.21638 | -1239.43731 |

Table S10: The absolute energies in hartree of the potential energy curve of VSi in the  $^2\Sigma^+$  state with a SP-based wave function and nom-CPO active space.

| Distance | SP          | tpbe        | ftpbe       | trevpbe     | ftrevpbe    | tblyp       | ftblyp      | torelyp     | ftorelyp    |
|----------|-------------|-------------|-------------|-------------|-------------|-------------|-------------|-------------|-------------|
| 14.93    | -1237.60493 | -1238.74941 | -1238.94905 | -1238.97556 | -1239.17869 | -1239.18806 | -1239.18806 | -1239.21638 | -1239.43731 |
| 15.02    | -1237.60493 | -1238.74941 | -1238.94905 | -1238.97555 | -1239.17869 | -1239.18806 | -1239.18806 | -1239.21638 | -1239.43730 |
| 15.12    | -1237.60492 | -1238.74941 | -1238.94905 | -1238.97555 | -1239.17869 | -1239.18807 | -1239.18807 | -1239.21638 | -1239.43731 |
| 15.21    | -1237.60492 | -1238.74941 | -1238.94904 | -1238.97555 | -1239.17868 | -1239.18807 | -1239.18807 | -1239.21638 | -1239.43730 |
| 15.31    | -1237.60492 | -1238.74941 | -1238.94905 | -1238.97555 | -1239.17869 | -1239.18807 | -1239.18807 | -1239.21638 | -1239.43731 |
| 15.40    | -1237.60492 | -1238.74940 | -1238.94904 | -1238.97555 | -1239.17868 | -1239.18807 | -1239.18807 | -1239.21638 | -1239.43730 |
| 15.50    | -1237.60492 | -1238.74940 | -1238.94904 | -1238.97555 | -1239.17868 | -1239.18807 | -1239.18807 | -1239.21638 | -1239.43731 |
| 15.59    | -1237.60491 | -1238.74940 | -1238.94904 | -1238.97555 | -1239.17868 | -1239.18808 | -1239.18808 | -1239.21638 | -1239.43730 |
| 15.68    | -1237.60491 | -1238.74940 | -1238.94904 | -1238.97555 | -1239.17868 | -1239.18808 | -1239.18808 | -1239.21638 | -1239.43731 |
| 15.78    | -1237.60491 | -1238.74940 | -1238.94904 | -1238.97554 | -1239.17868 | -1239.18808 | -1239.18808 | -1239.21638 | -1239.43730 |
| 15.87    | -1237.60491 | -1238.74940 | -1238.94904 | -1238.97554 | -1239.17868 | -1239.18808 | -1239.18808 | -1239.21638 | -1239.43731 |
| 15.97    | -1237.60491 | -1238.74939 | -1238.94903 | -1238.97554 | -1239.17868 | -1239.18808 | -1239.18808 | -1239.21637 | -1239.43730 |
| 16.06    | -1237.60491 | -1238.74939 | -1238.94904 | -1238.97554 | -1239.17868 | -1239.18808 | -1239.18808 | -1239.21638 | -1239.43731 |
| 16.16    | -1237.60490 | -1238.74939 | -1238.94903 | -1238.97554 | -1239.17867 | -1239.18808 | -1239.18808 | -1239.21637 | -1239.43730 |
| 16.25    | -1237.60490 | -1238.74939 | -1238.94904 | -1238.97554 | -1239.17868 | -1239.18809 | -1239.18809 | -1239.21638 | -1239.43731 |
| 16.35    | -1237.60490 | -1238.74939 | -1238.94903 | -1238.97554 | -1239.17867 | -1239.18809 | -1239.18809 | -1239.21638 | -1239.43730 |
| 16.44    | -1237.60490 | -1238.74939 | -1238.94903 | -1238.97554 | -1239.17867 | -1239.18809 | -1239.18809 | -1239.21637 | -1239.43730 |
| 16.54    | -1237.60490 | -1238.74939 | -1238.94903 | -1238.97554 | -1239.17867 | -1239.18809 | -1239.18809 | -1239.21637 | -1239.43730 |
| 16.63    | -1237.60490 | -1238.74939 | -1238.94903 | -1238.97554 | -1239.17867 | -1239.18809 | -1239.18809 | -1239.21638 | -1239.43730 |
| 16.72    | -1237.60490 | -1238.74939 | -1238.94903 | -1238.97554 | -1239.17867 | -1239.18809 | -1239.18809 | -1239.21637 | -1239.43730 |
| 16.82    | -1237.60490 | -1238.74939 | -1238.94903 | -1238.97554 | -1239.17867 | -1239.18809 | -1239.18809 | -1239.21638 | -1239.43731 |
| 16.91    | -1237.60489 | -1238.74939 | -1238.94903 | -1238.97554 | -1239.17867 | -1239.18810 | -1239.18810 | -1239.21637 | -1239.43730 |
| 17.01    | -1237.60489 | -1238.74939 | -1238.94903 | -1238.97554 | -1239.17867 | -1239.18810 | -1239.18810 | -1239.21638 | -1239.43731 |
| 17.10    | -1237.60489 | -1238.74939 | -1238.94903 | -1238.97554 | -1239.17867 | -1239.18810 | -1239.18810 | -1239.21638 | -1239.43730 |
| 17.20    | -1237.60489 | -1238.74939 | -1238.94903 | -1238.97554 | -1239.17867 | -1239.18810 | -1239.18810 | -1239.21638 | -1239.43731 |
| 17.29    | -1237.60489 | -1238.74939 | -1238.94903 | -1238.97554 | -1239.17867 | -1239.18810 | -1239.18810 | -1239.21637 | -1239.43730 |
| 17.39    | -1237.60489 | -1238.74939 | -1238.94903 | -1238.97554 | -1239.17867 | -1239.18810 | -1239.18810 | -1239.21638 | -1239.43731 |
| 17.48    | -1237.60489 | -1238.74939 | -1238.94903 | -1238.97553 | -1239.17867 | -1239.18810 | -1239.18810 | -1239.21637 | -1239.43730 |
| 17.57    | -1237.60489 | -1238.74938 | -1238.94903 | -1238.97553 | -1239.17867 | -1239.18810 | -1239.18810 | -1239.21637 | -1239.43730 |
| 17.67    | -1237.60489 | -1238.74939 | -1238.94903 | -1238.97554 | -1239.17867 | -1239.18810 | -1239.18810 | -1239.21637 | -1239.43731 |
| 17.76    | -1237.60489 | -1238.74938 | -1238.94903 | -1238.97553 | -1239.17867 | -1239.18810 | -1239.18810 | -1239.21637 | -1239.43730 |
| 17.86    | -1237.60488 | -1238.74938 | -1238.94903 | -1238.97553 | -1239.17867 | -1239.18810 | -1239.18810 | -1239.21637 | -1239.43730 |
| 17.95    | -1237.60488 | -1238.74938 | -1238.94903 | -1238.97553 | -1239.17867 | -1239.18810 | -1239.18810 | -1239.21637 | -1239.43730 |
| 18.05    | -1237.60488 | -1238.74938 | -1238.94902 | -1238.97553 | -1239.17867 | -1239.18810 | -1239.18810 | -1239.21637 | -1239.43730 |

Table S11: The absolute energies in hartree of the potential energy curve of VSi in the  $^2\Delta$  state with a SP-based wave function and nom-CPO active space.

| Distance | SP          | tpbe        | ftpbe       | trevpbe     | ftrevpbe    | tblyp       | ftblyp      | torelyp     | ftorelyp    |
|----------|-------------|-------------|-------------|-------------|-------------|-------------|-------------|-------------|-------------|
| 1.98     | -1235.24350 | -1236.52863 | -1236.73815 | -1236.73590 | -1236.94637 | -1236.94108 | -1237.14876 | -1237.00355 | -1237.23554 |
| 2.08     | -1235.66382 | -1236.93763 | -1237.14752 | -1237.14616 | -1237.35707 | -1237.35136 | -1237.55939 | -1237.41128 | -1237.64213 |
| 2.17     | -1235.99217 | -1237.25827 | -1237.46751 | -1237.46792 | -1237.67822 | -1237.67328 | -1237.88062 | -1237.72906 | -1237.95910 |
| 2.27     | -1236.25011 | -1237.50938 | -1237.71827 | -1237.72009 | -1237.93008 | -1237.92586 | -1238.13283 | -1237.97768 | -1238.20727 |
| 2.36     | -1236.47798 | -1237.69846 | -1237.90823 | -1237.91016 | -1238.12169 | -1238.12081 | -1238.32943 | -1238.15888 | -1238.39290 |
| 2.46     | -1236.64869 | -1237.86858 | -1238.07865 | -1238.08114 | -1238.29290 | -1238.29212 | -1238.50107 | -1238.32745 | -1238.56172 |
| 2.55     | -1236.78809 | -1238.00946 | -1238.21983 | -1238.22283 | -1238.43478 | -1238.43414 | -1238.64354 | -1238.46743 | -1238.70187 |
| 2.65     | -1236.90417 | -1238.12762 | -1238.33858 | -1238.34178 | -1238.55430 | -1238.55322 | -1238.76333 | -1238.58520 | -1238.82007 |
| 2.74     | -1237.00245 | -1238.22763 | -1238.43894 | -1238.44252 | -1238.65541 | -1238.65394 | -1238.86443 | -1238.68501 | -1238.92014 |
| 2.83     | -1237.09016 | -1238.31365 | -1238.52561 | -1238.52923 | -1238.74300 | -1238.73961 | -1238.95068 | -1238.77144 | -1239.00761 |
| 2.93     | -1237.16925 | -1238.38888 | -1238.60135 | -1238.60503 | -1238.81963 | -1238.81410 | -1239.02558 | -1238.84600 | -1239.08311 |
| 3.02     | -1237.23841 | -1238.45373 | -1238.66663 | -1238.67045 | -1238.88571 | -1238.87844 | -1239.09021 | -1238.91014 | -1239.14790 |

Table S11: The absolute energies in hartree of the potential energy curve of VSi in the  $^2\Delta$  state with a SP-based wave function and nom-CPO active space.

| Distance | SP          | tpbe        | ftpb        | trevpbe     | ftrevpbe    | tblyp       | ftblyp      | torelyp     | ftorelyp    |
|----------|-------------|-------------|-------------|-------------|-------------|-------------|-------------|-------------|-------------|
| 3.12     | -1237.29802 | -1238.50944 | -1238.72257 | -1238.72670 | -1238.94234 | -1238.93400 | -1239.14590 | -1238.96529 | -1239.20338 |
| 3.21     | -1237.34900 | -1238.55702 | -1238.77016 | -1238.77479 | -1238.99053 | -1238.98158 | -1239.19342 | -1239.01239 | -1239.25053 |
| 3.31     | -1237.39234 | -1238.59738 | -1238.81036 | -1238.81563 | -1239.03123 | -1239.02204 | -1239.23360 | -1239.05234 | -1239.29024 |
| 3.40     | -1237.42900 | -1238.63138 | -1238.84423 | -1238.85010 | -1239.06560 | -1239.05620 | -1239.26753 | -1239.08597 | -1239.32373 |
| 3.50     | -1237.45984 | -1238.65981 | -1238.87251 | -1238.87896 | -1239.09435 | -1239.08482 | -1239.29593 | -1239.11406 | -1239.35168 |
| 3.59     | -1237.48560 | -1238.68338 | -1238.89583 | -1238.90294 | -1239.11808 | -1239.10861 | -1239.31937 | -1239.13732 | -1239.37463 |
| 3.68     | -1237.50698 | -1238.70273 | -1238.91491 | -1238.92268 | -1239.13755 | -1239.12820 | -1239.33858 | -1239.15638 | -1239.39335 |
| 3.78     | -1237.52459 | -1238.71841 | -1238.93038 | -1238.93872 | -1239.15340 | -1239.14412 | -1239.35420 | -1239.17180 | -1239.40853 |
| 3.87     | -1237.53895 | -1238.73092 | -1238.94267 | -1238.95159 | -1239.16607 | -1239.15688 | -1239.36664 | -1239.18408 | -1239.42056 |
| 3.97     | -1237.55055 | -1238.74071 | -1238.95218 | -1238.96171 | -1239.17591 | -1239.16692 | -1239.37629 | -1239.19364 | -1239.42977 |
| 4.06     | -1237.55981 | -1238.74814 | -1238.95933 | -1238.96945 | -1239.18337 | -1239.17460 | -1239.38356 | -1239.20087 | -1239.43662 |
| 4.16     | -1237.56709 | -1238.75355 | -1238.96451 | -1238.97517 | -1239.18886 | -1239.18026 | -1239.38886 | -1239.20610 | -1239.44155 |
| 4.35     | -1237.57270 | -1238.75723 | -1238.96798 | -1238.97914 | -1239.19265 | -1239.18417 | -1239.39245 | -1239.20962 | -1239.44481 |
| 4.44     | -1237.57691 | -1238.75942 | -1238.96998 | -1238.98161 | -1239.19495 | -1239.18660 | -1239.39455 | -1239.21166 | -1239.44661 |
| 4.54     | -1237.57996 | -1238.76037 | -1238.97071 | -1238.98284 | -1239.19598 | -1239.18778 | -1239.39538 | -1239.21249 | -1239.44717 |
| 4.63     | -1237.58204 | -1238.76027 | -1238.97040 | -1238.98301 | -1239.19596 | -1239.18790 | -1239.39514 | -1239.21230 | -1239.44670 |
| 4.72     | -1237.58331 | -1238.75931 | -1238.96925 | -1238.98230 | -1239.19510 | -1239.18714 | -1239.39406 | -1239.21126 | -1239.44544 |
| 4.82     | -1237.58392 | -1238.75761 | -1238.96739 | -1238.98086 | -1239.19353 | -1239.18566 | -1239.39229 | -1239.20952 | -1239.44351 |
| 4.91     | -1237.58398 | -1238.75530 | -1238.96493 | -1238.97879 | -1239.19134 | -1239.18356 | -1239.38990 | -1239.20720 | -1239.44101 |
| 5.01     | -1237.58360 | -1238.75226 | -1238.96173 | -1238.97599 | -1239.18840 | -1239.18073 | -1239.38677 | -1239.20416 | -1239.43779 |
| 5.10     | -1237.58294 | -1238.74619 | -1238.95542 | -1238.97019 | -1239.18239 | -1239.17491 | -1239.38047 | -1239.19809 | -1239.43143 |
| 5.20     | -1237.58209 | -1238.74200 | -1238.95105 | -1238.96621 | -1239.17824 | -1239.17094 | -1239.37620 | -1239.19397 | -1239.42711 |
| 5.29     | -1237.58098 | -1238.73871 | -1238.94763 | -1238.96311 | -1239.17502 | -1239.16789 | -1239.37295 | -1239.19080 | -1239.42381 |
| 5.39     | -1237.57963 | -1238.73568 | -1238.94450 | -1238.96025 | -1239.17207 | -1239.16511 | -1239.37000 | -1239.18790 | -1239.42082 |
| 5.48     | -1237.57807 | -1238.73277 | -1238.94152 | -1238.95749 | -1239.16924 | -1239.16245 | -1239.36722 | -1239.18513 | -1239.41799 |
| 5.57     | -1237.57635 | -1238.72995 | -1238.93862 | -1238.95481 | -1239.16649 | -1239.15989 | -1239.36455 | -1239.18245 | -1239.41526 |
| 5.67     | -1237.57450 | -1238.72718 | -1238.93579 | -1238.95218 | -1239.16379 | -1239.15740 | -1239.36196 | -1239.17983 | -1239.41260 |
| 5.76     | -1237.57254 | -1238.72448 | -1238.93303 | -1238.94960 | -1239.16114 | -1239.15499 | -1239.35945 | -1239.17728 | -1239.41001 |
| 5.86     | -1237.57051 | -1238.72183 | -1238.93034 | -1238.94707 | -1239.15856 | -1239.15264 | -1239.35703 | -1239.17479 | -1239.40750 |
| 5.95     | -1237.56844 | -1238.71927 | -1238.92773 | -1238.94460 | -1239.15605 | -1239.15038 | -1239.35472 | -1239.17238 | -1239.40509 |
| 6.05     | -1237.56634 | -1238.71678 | -1238.92521 | -1238.94221 | -1239.15362 | -1239.14822 | -1239.35251 | -1239.17006 | -1239.40277 |
| 6.14     | -1237.56425 | -1238.71438 | -1238.92278 | -1238.93990 | -1239.15126 | -1239.14615 | -1239.35040 | -1239.16781 | -1239.40054 |
| 6.24     | -1237.56217 | -1238.71207 | -1238.92045 | -1238.93767 | -1239.14900 | -1239.14419 | -1239.34842 | -1239.16566 | -1239.39841 |
| 6.33     | -1237.56014 | -1238.70986 | -1238.91822 | -1238.93552 | -1239.14682 | -1239.14233 | -1239.34655 | -1239.16359 | -1239.39638 |
| 6.43     | -1237.55815 | -1238.70773 | -1238.91607 | -1238.93346 | -1239.14471 | -1239.14059 | -1239.34479 | -1239.16162 | -1239.39443 |
| 6.52     | -1237.55624 | -1238.70569 | -1238.91401 | -1238.93148 | -1239.14270 | -1239.13894 | -1239.34314 | -1239.15973 | -1239.39259 |
| 6.61     | -1237.55441 | -1238.70373 | -1238.91205 | -1238.92957 | -1239.14077 | -1239.13739 | -1239.34162 | -1239.15792 | -1239.39084 |
| 6.71     | -1237.55268 | -1238.70185 | -1238.91017 | -1238.92773 | -1239.13891 | -1239.13594 | -1239.34020 | -1239.15620 | -1239.38917 |
| 6.80     | -1237.55106 | -1238.70004 | -1238.90835 | -1238.92595 | -1239.13710 | -1239.13458 | -1239.33888 | -1239.15454 | -1239.38755 |
| 6.90     | -1237.54957 | -1238.69828 | -1238.90658 | -1238.92423 | -1239.13535 | -1239.13330 | -1239.33764 | -1239.15294 | -1239.38599 |
| 6.99     | -1237.54821 | -1238.69658 | -1238.90488 | -1238.92256 | -1239.13364 | -1239.13208 | -1239.33648 | -1239.15141 | -1239.38449 |
| 7.09     | -1237.54699 | -1238.69491 | -1238.90322 | -1238.92093 | -1239.13199 | -1239.13091 | -1239.33538 | -1239.14993 | -1239.38303 |
| 7.18     | -1237.54591 | -1238.69330 | -1238.90162 | -1238.91935 | -1239.13039 | -1239.12980 | -1239.33434 | -1239.14852 | -1239.38163 |
| 7.28     | -1237.54496 | -1238.69177 | -1238.90011 | -1238.91785 | -1239.12889 | -1239.12874 | -1239.33336 | -1239.14720 | -1239.38033 |
| 7.37     | -1237.54415 | -1238.69034 | -1238.89870 | -1238.91647 | -1239.12751 | -1239.12775 | -1239.33245 | -1239.14600 | -1239.37914 |
| 7.46     | -1237.54344 | -1238.68903 | -1238.89742 | -1238.91520 | -1239.12626 | -1239.12684 | -1239.33161 | -1239.14492 | -1239.37808 |
| 7.56     | -1237.54283 | -1238.68784 | -1238.89626 | -1238.91407 | -1239.12515 | -1239.12601 | -1239.33084 | -1239.14396 | -1239.37713 |
| 7.65     | -1237.54230 | -1238.68678 | -1238.89523 | -1238.91307 | -1239.12415 | -1239.12527 | -1239.33015 | -1239.14312 | -1239.37629 |
| 7.75     | -1237.54183 | -1238.68583 | -1238.89430 | -1238.91218 | -1239.12328 | -1239.12460 | -1239.32952 | -1239.14238 | -1239.37557 |
| 7.84     | -1237.54142 | -1238.68499 | -1238.89346 | -1238.91139 | -1239.12249 | -1239.12400 | -1239.32896 | -1239.14174 | -1239.37492 |
| 7.94     | -1237.54106 | -1238.68422 | -1238.89270 | -1238.91068 | -1239.12179 | -1239.12346 | -1239.32844 | -1239.14117 | -1239.37436 |
| 8.03     | -1237.54073 | -1238.68353 | -1238.89202 | -1238.91005 | -1239.12117 | -1239.12298 | -1239.32798 | -1239.14067 | -1239.37386 |

Table S11: The absolute energies in hartree of the potential energy curve of VSi in the  $^2\Delta$  state with a SP-based wave function and nom-CPO active space.

| Distance | SP          | tpbe        | ftpbbe      | trevpbe     | ftrevpbe    | tblyp       | ftblyp      | torelyp     | ftorelyp    |
|----------|-------------|-------------|-------------|-------------|-------------|-------------|-------------|-------------|-------------|
| 8.13     | -1237.54044 | -1238.68291 | -1238.89141 | -1238.90949 | -1239.12061 | -1239.12254 | -1239.32756 | -1239.14024 | -1239.37343 |
| 8.22     | -1237.54018 | -1238.68235 | -1238.89085 | -1238.90898 | -1239.12011 | -1239.12215 | -1239.32718 | -1239.13986 | -1239.37304 |
| 8.31     | -1237.53995 | -1238.68185 | -1238.89034 | -1238.90853 | -1239.11966 | -1239.12180 | -1239.32683 | -1239.13953 | -1239.37271 |
| 8.41     | -1237.53973 | -1238.68139 | -1238.88988 | -1238.90813 | -1239.11926 | -1239.12149 | -1239.32652 | -1239.13925 | -1239.37242 |
| 8.50     | -1237.53954 | -1238.68098 | -1238.88947 | -1238.90778 | -1239.11889 | -1239.12121 | -1239.32624 | -1239.13901 | -1239.37216 |
| 8.60     | -1237.53937 | -1238.68060 | -1238.88909 | -1238.90746 | -1239.11857 | -1239.12096 | -1239.32598 | -1239.13879 | -1239.37194 |
| 8.69     | -1237.53921 | -1238.68026 | -1238.88875 | -1238.90717 | -1239.11828 | -1239.12073 | -1239.32575 | -1239.13861 | -1239.37174 |
| 8.79     | -1237.53906 | -1238.67996 | -1238.88843 | -1238.90691 | -1239.11802 | -1239.12053 | -1239.32555 | -1239.13846 | -1239.37158 |
| 8.88     | -1237.53893 | -1238.67968 | -1238.88815 | -1238.90669 | -1239.11778 | -1239.12034 | -1239.32536 | -1239.13833 | -1239.37143 |
| 8.98     | -1237.53881 | -1238.67942 | -1238.88789 | -1238.90648 | -1239.11757 | -1239.12018 | -1239.32518 | -1239.13821 | -1239.37130 |
| 9.07     | -1237.53870 | -1238.67919 | -1238.88765 | -1238.90630 | -1239.11738 | -1239.12003 | -1239.32503 | -1239.13812 | -1239.37119 |
| 9.17     | -1237.53860 | -1238.67899 | -1238.88744 | -1238.90614 | -1239.11721 | -1239.11990 | -1239.32489 | -1239.13805 | -1239.37110 |
| 9.26     | -1237.53851 | -1238.67880 | -1238.88724 | -1238.90600 | -1239.11706 | -1239.11979 | -1239.32477 | -1239.13799 | -1239.37103 |
| 9.35     | -1237.53843 | -1238.67864 | -1238.88707 | -1238.90588 | -1239.11693 | -1239.11969 | -1239.32466 | -1239.13794 | -1239.37097 |
| 9.45     | -1237.53835 | -1238.67849 | -1238.88691 | -1238.90577 | -1239.11681 | -1239.11961 | -1239.32457 | -1239.13791 | -1239.37092 |
| 9.54     | -1237.53828 | -1238.67835 | -1238.88677 | -1238.90567 | -1239.11671 | -1239.11953 | -1239.32448 | -1239.13788 | -1239.37088 |
| 9.64     | -1237.53821 | -1238.67823 | -1238.88664 | -1238.90559 | -1239.11661 | -1239.11946 | -1239.32440 | -1239.13786 | -1239.37085 |
| 9.73     | -1237.53815 | -1238.67812 | -1238.88652 | -1238.90552 | -1239.11653 | -1239.11940 | -1239.32433 | -1239.13785 | -1239.37082 |
| 9.83     | -1237.53810 | -1238.67802 | -1238.88642 | -1238.90545 | -1239.11646 | -1239.11935 | -1239.32427 | -1239.13784 | -1239.37080 |
| 9.92     | -1237.53804 | -1238.67793 | -1238.88632 | -1238.90540 | -1239.11639 | -1239.11931 | -1239.32422 | -1239.13784 | -1239.37078 |
| 10.02    | -1237.53800 | -1238.67785 | -1238.88623 | -1238.90535 | -1239.11633 | -1239.11927 | -1239.32417 | -1239.13784 | -1239.37076 |
| 10.11    | -1237.53795 | -1238.67777 | -1238.88614 | -1238.90530 | -1239.11628 | -1239.11924 | -1239.32413 | -1239.13785 | -1239.37075 |
| 10.20    | -1237.53791 | -1238.67770 | -1238.88607 | -1238.90526 | -1239.11623 | -1239.11921 | -1239.32409 | -1239.13785 | -1239.37074 |
| 10.30    | -1237.53788 | -1238.67764 | -1238.88600 | -1238.90523 | -1239.11619 | -1239.11919 | -1239.32406 | -1239.13786 | -1239.37074 |
| 10.39    | -1237.53784 | -1238.67759 | -1238.88594 | -1238.90520 | -1239.11615 | -1239.11917 | -1239.32403 | -1239.13787 | -1239.37074 |
| 10.49    | -1237.53781 | -1238.67754 | -1238.88588 | -1238.90518 | -1239.11612 | -1239.11916 | -1239.32401 | -1239.13789 | -1239.37074 |
| 10.58    | -1237.53778 | -1238.67750 | -1238.88584 | -1238.90516 | -1239.11609 | -1239.11915 | -1239.32399 | -1239.13790 | -1239.37074 |
| 10.68    | -1237.53775 | -1238.67746 | -1238.88579 | -1238.90515 | -1239.11607 | -1239.11914 | -1239.32398 | -1239.13792 | -1239.37074 |
| 10.77    | -1237.53772 | -1238.67742 | -1238.88575 | -1238.90513 | -1239.11605 | -1239.11913 | -1239.32396 | -1239.13793 | -1239.37075 |
| 10.87    | -1237.53770 | -1238.67739 | -1238.88571 | -1238.90512 | -1239.11603 | -1239.11913 | -1239.32395 | -1239.13794 | -1239.37075 |
| 10.96    | -1237.53768 | -1238.67736 | -1238.88568 | -1238.90511 | -1239.11601 | -1239.11912 | -1239.32394 | -1239.13795 | -1239.37075 |
| 11.05    | -1237.53766 | -1238.67733 | -1238.88565 | -1238.90510 | -1239.11600 | -1239.11912 | -1239.32393 | -1239.13797 | -1239.37075 |
| 11.15    | -1237.53764 | -1238.67731 | -1238.88562 | -1238.90508 | -1239.11598 | -1239.11912 | -1239.32393 | -1239.13798 | -1239.37075 |
| 11.24    | -1237.53762 | -1238.67728 | -1238.88559 | -1238.90508 | -1239.11596 | -1239.11912 | -1239.32392 | -1239.13799 | -1239.37075 |
| 11.34    | -1237.53760 | -1238.67726 | -1238.88556 | -1238.90507 | -1239.11595 | -1239.11913 | -1239.32392 | -1239.13800 | -1239.37075 |
| 11.43    | -1237.53759 | -1238.67724 | -1238.88554 | -1238.90506 | -1239.11594 | -1239.11913 | -1239.32392 | -1239.13801 | -1239.37075 |
| 11.53    | -1237.53757 | -1238.67723 | -1238.88552 | -1238.90506 | -1239.11593 | -1239.11914 | -1239.32392 | -1239.13802 | -1239.37075 |
| 11.62    | -1237.53756 | -1238.67721 | -1238.88550 | -1238.90506 | -1239.11592 | -1239.11915 | -1239.32392 | -1239.13804 | -1239.37076 |
| 11.72    | -1237.53754 | -1238.67720 | -1238.88548 | -1238.90506 | -1239.11592 | -1239.11915 | -1239.32393 | -1239.13805 | -1239.37076 |
| 11.81    | -1237.53753 | -1238.67719 | -1238.88547 | -1238.90505 | -1239.11591 | -1239.11916 | -1239.32393 | -1239.13805 | -1239.37076 |
| 11.91    | -1237.53752 | -1238.67718 | -1238.88546 | -1238.90505 | -1239.11590 | -1239.11917 | -1239.32393 | -1239.13806 | -1239.37076 |
| 12.00    | -1237.53751 | -1238.67717 | -1238.88544 | -1238.90505 | -1239.11590 | -1239.11917 | -1239.32393 | -1239.13807 | -1239.37076 |
| 12.09    | -1237.53750 | -1238.67716 | -1238.88543 | -1238.90505 | -1239.11589 | -1239.11918 | -1239.32394 | -1239.13807 | -1239.37076 |
| 12.19    | -1237.53749 | -1238.67715 | -1238.88542 | -1238.90504 | -1239.11589 | -1239.11919 | -1239.32394 | -1239.13807 | -1239.37076 |
| 12.28    | -1237.53748 | -1238.67714 | -1238.88541 | -1238.90504 | -1239.11588 | -1239.11919 | -1239.32394 | -1239.13808 | -1239.37076 |
| 12.38    | -1237.53747 | -1238.67713 | -1238.88540 | -1238.90504 | -1239.11588 | -1239.11920 | -1239.32395 | -1239.13808 | -1239.37076 |
| 12.47    | -1237.53746 | -1238.67712 | -1238.88539 | -1238.90504 | -1239.11587 | -1239.11921 | -1239.32395 | -1239.13809 | -1239.37076 |
| 12.57    | -1237.53746 | -1238.67711 | -1238.88538 | -1238.90504 | -1239.11587 | -1239.11921 | -1239.32396 | -1239.13809 | -1239.37075 |
| 12.66    | -1237.53745 | -1238.67711 | -1238.88537 | -1238.90503 | -1239.11586 | -1239.11922 | -1239.32396 | -1239.13810 | -1239.37075 |
| 12.76    | -1237.53744 | -1238.67710 | -1238.88536 | -1238.90503 | -1239.11586 | -1239.11923 | -1239.32397 | -1239.13810 | -1239.37075 |
| 12.85    | -1237.53743 | -1238.67710 | -1238.88536 | -1238.90503 | -1239.11585 | -1239.11924 | -1239.32397 | -1239.13810 | -1239.37075 |
| 12.94    | -1237.53743 | -1238.67709 | -1238.88535 | -1238.90503 | -1239.11585 | -1239.11924 | -1239.32398 | -1239.13811 | -1239.37075 |



Table S11: The absolute energies in hartree of the potential energy curve of VSi in the  $^2\Delta$  state with a SP-based wave function and nom-CPO active space.

| Distance | SP          | tpbe        | ftpbe       | trevpbe     | ftrevpbe    | tblyp       | ftblyp      | torelyp     | ftorelyp    |
|----------|-------------|-------------|-------------|-------------|-------------|-------------|-------------|-------------|-------------|
| 17.95    | -1237.53731 | -1238.67705 | -1238.88530 | -1238.90503 | -1239.11582 | -1239.11940 | -1239.32411 | -1239.13813 | -1239.37073 |
| 18.05    | -1237.53731 | -1238.67705 | -1238.88530 | -1238.90502 | -1239.11582 | -1239.11940 | -1239.32411 | -1239.13813 | -1239.37073 |

Table S12: The absolute energies in hartree of the potential energy curve of NbSi in the  $^4\Pi$  state with a CASSCF wave function and nom-CPO active space.

| Distance | CASSCF      | CASPT2      | tpbe        | ftpbe       | trevpbe     | ftrevpbe    | tblyp       | ftblyp      | torelyp     | ftorelyp    |
|----------|-------------|-------------|-------------|-------------|-------------|-------------|-------------|-------------|-------------|-------------|
| 1.98     | -4102.00026 | -4102.48735 | -4104.18979 | -4104.66309 | -4104.46862 | -4104.94503 | -4104.82668 | -4105.29417 | -4105.76608 | -4106.28632 |
| 2.08     | -4102.80637 | -4103.29636 | -4104.99127 | -4105.46440 | -4105.27125 | -4105.74747 | -4105.63012 | -4106.09740 | -4106.56359 | -4107.08362 |
| 2.17     | -4103.45707 | -4103.94981 | -4105.63685 | -4106.10984 | -4105.91804 | -4106.39409 | -4106.27730 | -4106.74440 | -4107.20580 | -4107.72561 |
| 2.27     | -4103.97998 | -4104.47601 | -4106.15515 | -4106.62804 | -4106.43760 | -4106.91351 | -4106.79686 | -4107.26377 | -4107.72150 | -4108.24113 |
| 2.36     | -4104.40138 | -4104.90756 | -4106.57199 | -4107.04427 | -4106.85569 | -4107.33082 | -4107.21512 | -4107.68119 | -4108.13843 | -4108.65703 |
| 2.46     | -4104.74707 | -4105.25372 | -4106.90825 | -4107.37841 | -4107.19290 | -4107.66501 | -4107.55337 | -4108.01807 | -4108.47427 | -4108.98914 |
| 2.55     | -4105.02867 | -4105.52914 | -4107.17813 | -4107.64579 | -4107.46377 | -4107.93261 | -4107.82468 | -4108.28793 | -4108.74337 | -4109.25435 |
| 2.65     | -4105.25654 | -4105.75365 | -4107.40005 | -4107.86759 | -4107.68658 | -4108.15533 | -4108.04726 | -4108.51028 | -4108.96333 | -4109.47423 |
| 2.74     | -4105.42599 | -4105.90016 | -4107.55651 | -4108.02787 | -4107.84255 | -4108.31666 | -4108.20722 | -4108.67374 | -4109.10815 | -4109.62653 |
| 2.83     | -4105.58936 | -4106.05930 | -4107.71501 | -4108.18661 | -4108.00187 | -4108.47627 | -4108.36601 | -4108.83254 | -4109.26552 | -4109.78412 |
| 2.93     | -4105.72479 | -4106.19133 | -4107.84699 | -4108.31863 | -4108.13461 | -4108.60908 | -4108.49840 | -4108.96477 | -4109.39647 | -4109.91505 |
| 3.02     | -4105.83711 | -4106.30154 | -4107.95701 | -4108.42858 | -4108.24531 | -4108.71975 | -4108.60885 | -4109.07498 | -4109.50547 | -4110.02400 |
| 3.12     | -4105.93026 | -4106.39360 | -4108.04885 | -4108.52030 | -4108.33775 | -4108.81212 | -4108.70115 | -4109.16700 | -4109.59629 | -4110.11477 |
| 3.21     | -4106.00748 | -4106.47047 | -4108.12558 | -4108.59684 | -4108.41501 | -4108.88926 | -4108.77834 | -4109.24385 | -4109.67202 | -4110.19043 |
| 3.31     | -4106.05987 | -4106.53073 | -4108.18751 | -4108.65682 | -4108.47758 | -4108.94942 | -4108.84181 | -4109.30616 | -4109.73635 | -4110.25136 |
| 3.40     | -4106.11529 | -4106.58602 | -4108.24172 | -4108.71019 | -4108.53215 | -4109.00338 | -4108.89658 | -4109.35977 | -4109.78926 | -4110.30376 |
| 3.50     | -4106.16210 | -4106.63176 | -4108.28696 | -4108.75498 | -4108.57775 | -4109.04872 | -4108.94219 | -4109.40475 | -4109.83342 | -4110.34765 |
| 3.59     | -4106.20103 | -4106.66959 | -4108.32441 | -4108.79194 | -4108.61552 | -4109.08612 | -4108.98011 | -4109.44207 | -4109.86991 | -4110.38376 |
| 3.68     | -4106.23312 | -4106.70053 | -4108.35502 | -4108.82213 | -4108.64644 | -4109.11670 | -4109.01124 | -4109.47269 | -4109.89967 | -4110.41318 |
| 3.78     | -4106.25931 | -4106.72555 | -4108.37977 | -4108.84654 | -4108.67148 | -4109.14147 | -4109.03652 | -4109.49754 | -4109.92372 | -4110.43694 |
| 3.87     | -4106.28043 | -4106.74553 | -4108.39957 | -4108.86607 | -4108.69155 | -4109.16133 | -4109.05685 | -4109.51751 | -4109.94292 | -4110.45591 |
| 3.97     | -4106.29722 | -4106.76124 | -4108.41513 | -4108.88141 | -4108.70738 | -4109.17698 | -4109.07296 | -4109.53330 | -4109.95798 | -4110.47077 |
| 4.06     | -4106.31031 | -4106.77333 | -4108.42711 | -4108.89319 | -4108.71961 | -4109.18906 | -4109.08548 | -4109.54553 | -4109.96954 | -4110.48216 |
| 4.16     | -4106.32026 | -4106.78238 | -4108.43608 | -4108.90199 | -4108.72882 | -4109.19815 | -4109.09500 | -4109.55478 | -4109.97817 | -4110.49063 |
| 4.35     | -4106.32737 | -4106.78778 | -4108.44127 | -4108.90734 | -4108.73434 | -4109.20385 | -4109.10059 | -4109.56043 | -4109.98386 | -4110.49636 |
| 4.44     | -4106.33252 | -4106.79208 | -4108.44559 | -4108.91155 | -4108.73888 | -4109.20833 | -4109.10545 | -4109.56509 | -4109.98803 | -4110.50047 |
| 4.54     | -4106.33582 | -4106.79472 | -4108.44822 | -4108.91404 | -4108.74171 | -4109.21107 | -4109.10861 | -4109.56800 | -4109.99047 | -4110.50282 |
| 4.63     | -4106.33759 | -4106.79594 | -4108.44942 | -4108.91509 | -4108.74309 | -4109.21235 | -4109.11035 | -4109.56946 | -4109.99150 | -4110.50373 |
| 4.72     | -4106.33809 | -4106.79598 | -4108.44945 | -4108.91498 | -4108.74329 | -4109.21246 | -4109.11092 | -4109.56974 | -4109.99138 | -4110.50350 |
| 4.82     | -4106.33757 | -4106.79507 | -4108.44855 | -4108.91395 | -4108.74255 | -4109.21164 | -4109.11054 | -4109.56907 | -4109.99034 | -4110.50236 |
| 4.91     | -4106.33623 | -4106.79340 | -4108.44688 | -4108.91217 | -4108.74102 | -4109.21007 | -4109.10938 | -4109.56761 | -4109.98853 | -4110.50047 |
| 5.01     | -4106.33425 | -4106.79114 | -4108.44459 | -4108.90979 | -4108.73886 | -4109.20788 | -4109.10759 | -4109.56552 | -4109.98612 | -4110.49798 |
| 5.10     | -4106.33178 | -4106.78841 | -4108.44183 | -4108.90694 | -4108.73622 | -4109.20524 | -4109.10530 | -4109.56292 | -4109.98322 | -4110.49503 |
| 5.20     | -4106.32895 | -4106.78533 | -4108.43871 | -4108.90375 | -4108.73321 | -4109.20224 | -4109.10263 | -4109.55995 | -4109.97995 | -4110.49172 |
| 5.29     | -4106.32587 | -4106.78198 | -4108.43533 | -4108.90030 | -4108.72993 | -4109.19899 | -4109.09966 | -4109.55668 | -4109.97640 | -4110.48814 |
| 5.39     | -4106.32262 | -4106.77844 | -4108.43173 | -4108.89666 | -4108.72643 | -4109.19554 | -4109.09646 | -4109.55318 | -4109.97262 | -4110.48435 |
| 5.48     | -4106.31927 | -4106.77475 | -4108.42799 | -4108.89287 | -4108.72277 | -4109.19194 | -4109.09308 | -4109.54951 | -4109.96870 | -4110.48042 |
| 5.57     | -4106.31588 | -4106.77096 | -4108.42417 | -4108.88901 | -4108.71903 | -4109.18826 | -4109.08961 | -4109.54574 | -4109.96470 | -4110.47641 |
| 5.67     | -4106.31248 | -4106.76712 | -4108.42035 | -4108.88515 | -4108.71530 | -4109.18458 | -4109.08612 | -4109.54197 | -4109.96073 | -4110.47243 |
| 5.76     | -4106.30911 | -4106.76328 | -4108.41661 | -4108.88136 | -4108.71163 | -4109.18095 | -4109.08268 | -4109.53826 | -4109.95686 | -4110.46855 |
| 5.86     | -4106.30579 | -4106.75946 | -4108.41304 | -4108.87773 | -4108.70814 | -4109.17750 | -4109.07941 | -4109.53472 | -4109.95325 | -4110.46491 |
| 5.95     | -4106.30254 | -4106.75568 | -4108.40976 | -4108.87440 | -4108.70494 | -4109.17434 | -4109.07642 | -4109.53147 | -4109.95010 | -4110.46170 |
| 6.05     | -4106.29950 | -4106.74856 | -4108.40493 | -4108.87000 | -4108.70032 | -4109.17044 | -4109.07172 | -4109.52676 | -4109.94667 | -4110.45852 |
| 6.14     | -4106.29673 | -4106.74455 | -4108.40132 | -4108.86641 | -4108.69678 | -4109.16707 | -4109.06829 | -4109.52310 | -4109.94304 | -4110.45493 |

Table S12: The absolute energies in hartree of the potential energy curve of NbSi in the  $^4\Pi$  state with a CASSCF wave function and nom-CPO active space.

| Distance | CASSCF      | CASPT2      | tpbe        | ftpb        | trevpb      | ftrevpb     | tblyp       | ftblyp      | torelyp     | ftorelyp    |
|----------|-------------|-------------|-------------|-------------|-------------|-------------|-------------|-------------|-------------|-------------|
| 6.24     | -4106.29412 | -4106.74106 | -4108.39813 | -4108.86322 | -4108.69365 | -4109.16406 | -4109.06528 | -4109.51987 | -4109.93976 | -4110.45167 |
| 6.33     | -4106.28991 | -4106.72610 | -4108.37182 | -4108.83837 | -4108.66778 | -4109.13938 | -4109.03868 | -4109.49517 | -4109.90846 | -4110.42255 |
| 6.43     | -4106.28752 | -4106.72231 | -4108.36803 | -4108.83459 | -4108.66409 | -4109.13572 | -4109.03519 | -4109.49162 | -4109.90475 | -4110.41890 |
| 6.52     | -4106.28518 | -4106.71883 | -4108.36470 | -4108.83128 | -4108.66086 | -4109.13251 | -4109.03220 | -4109.48858 | -4109.90155 | -4110.41575 |
| 6.61     | -4106.28290 | -4106.71554 | -4108.36162 | -4108.82821 | -4108.65787 | -4109.12953 | -4109.02946 | -4109.48581 | -4109.89860 | -4110.41286 |
| 6.71     | -4106.28069 | -4106.71239 | -4108.35873 | -4108.82534 | -4108.65506 | -4109.12673 | -4109.02694 | -4109.48327 | -4109.89587 | -4110.41019 |
| 6.80     | -4106.27857 | -4106.70937 | -4108.35601 | -4108.82265 | -4108.65242 | -4109.12410 | -4109.02462 | -4109.48095 | -4109.89332 | -4110.40771 |
| 6.90     | -4106.27655 | -4106.70644 | -4108.35344 | -4108.82011 | -4108.64992 | -4109.12162 | -4109.02247 | -4109.47883 | -4109.89094 | -4110.40541 |
| 6.99     | -4106.27465 | -4106.70357 | -4108.35099 | -4108.81771 | -4108.64755 | -4109.11926 | -4109.02049 | -4109.47692 | -4109.88871 | -4110.40327 |
| 7.09     | -4106.27289 | -4106.70076 | -4108.34864 | -4108.81543 | -4108.64527 | -4109.11700 | -4109.01867 | -4109.47522 | -4109.88661 | -4110.40127 |
| 7.18     | -4106.27129 | -4106.69814 | -4108.34639 | -4108.81326 | -4108.64309 | -4109.11485 | -4109.01699 | -4109.47367 | -4109.88464 | -4110.39939 |
| 7.28     | -4106.26986 | -4106.69577 | -4108.34425 | -4108.81119 | -4108.64101 | -4109.11278 | -4109.01540 | -4109.47223 | -4109.88278 | -4110.39761 |
| 7.37     | -4106.26858 | -4106.69363 | -4108.34220 | -4108.80920 | -4108.63902 | -4109.11081 | -4109.01390 | -4109.47088 | -4109.88102 | -4110.39592 |
| 7.46     | -4106.26744 | -4106.69171 | -4108.34025 | -4108.80731 | -4108.63713 | -4109.10892 | -4109.01246 | -4109.46959 | -4109.87936 | -4110.39431 |
| 7.56     | -4106.26642 | -4106.68998 | -4108.33840 | -4108.80551 | -4108.63535 | -4109.10714 | -4109.01110 | -4109.46836 | -4109.87781 | -4110.39279 |
| 7.65     | -4106.26552 | -4106.68842 | -4108.33666 | -4108.80382 | -4108.63367 | -4109.10547 | -4109.00981 | -4109.46720 | -4109.87636 | -4110.39137 |
| 7.75     | -4106.26472 | -4106.68701 | -4108.33503 | -4108.80224 | -4108.63211 | -4109.10391 | -4109.00860 | -4109.46611 | -4109.87501 | -4110.39004 |
| 7.84     | -4106.26402 | -4106.68574 | -4108.33351 | -4108.80076 | -4108.63066 | -4109.10247 | -4109.00746 | -4109.46508 | -4109.87378 | -4110.38882 |
| 7.94     | -4106.26339 | -4106.68459 | -4108.33211 | -4108.79938 | -4108.62933 | -4109.10113 | -4109.00640 | -4109.46413 | -4109.87264 | -4110.38769 |
| 8.03     | -4106.26284 | -4106.68355 | -4108.33081 | -4108.79812 | -4108.62810 | -4109.09991 | -4109.00542 | -4109.46324 | -4109.87161 | -4110.38666 |
| 8.13     | -4106.26235 | -4106.68262 | -4108.32962 | -4108.79696 | -4108.62698 | -4109.09879 | -4109.00451 | -4109.46241 | -4109.87068 | -4110.38573 |
| 8.22     | -4106.26192 | -4106.68178 | -4108.32853 | -4108.79589 | -4108.62596 | -4109.09777 | -4109.00368 | -4109.46165 | -4109.86984 | -4110.38489 |
| 8.31     | -4106.26154 | -4106.68102 | -4108.32754 | -4108.79492 | -4108.62504 | -4109.09685 | -4109.00291 | -4109.46096 | -4109.86910 | -4110.38414 |
| 8.41     | -4106.26120 | -4106.68033 | -4108.32664 | -4108.79404 | -4108.62422 | -4109.09603 | -4109.00222 | -4109.46032 | -4109.86844 | -4110.38347 |
| 8.50     | -4106.26090 | -4106.67971 | -4108.32584 | -4108.79324 | -4108.62348 | -4109.09529 | -4109.00160 | -4109.45975 | -4109.86786 | -4110.38288 |
| 8.60     | -4106.26063 | -4106.67915 | -4108.32511 | -4108.79253 | -4108.62283 | -4109.09463 | -4109.00105 | -4109.45924 | -4109.86736 | -4110.38236 |
| 8.69     | -4106.26040 | -4106.67864 | -4108.32446 | -4108.79188 | -4108.62224 | -4109.09404 | -4109.00054 | -4109.45877 | -4109.86692 | -4110.38191 |
| 8.79     | -4106.26018 | -4106.67819 | -4108.32388 | -4108.79131 | -4108.62173 | -4109.09352 | -4109.00010 | -4109.45836 | -4109.86654 | -4110.38151 |
| 8.88     | -4106.26000 | -4106.67778 | -4108.32337 | -4108.79080 | -4108.62128 | -4109.09306 | -4108.99972 | -4109.45799 | -4109.86621 | -4110.38116 |
| 8.98     | -4106.25983 | -4106.67740 | -4108.32290 | -4108.79032 | -4108.62087 | -4109.09264 | -4108.99936 | -4109.45765 | -4109.86593 | -4110.38086 |
| 9.07     | -4106.25968 | -4106.67706 | -4108.32250 | -4108.78991 | -4108.62052 | -4109.09228 | -4108.99906 | -4109.45736 | -4109.86569 | -4110.38060 |
| 9.17     | -4106.25954 | -4106.67675 | -4108.32213 | -4108.78954 | -4108.62021 | -4109.09195 | -4108.99879 | -4109.45709 | -4109.86548 | -4110.38037 |
| 9.26     | -4106.25942 | -4106.67647 | -4108.32180 | -4108.78920 | -4108.61993 | -4109.09166 | -4108.99855 | -4109.45685 | -4109.86531 | -4110.38017 |
| 9.35     | -4106.25931 | -4106.67621 | -4108.32150 | -4108.78890 | -4108.61969 | -4109.09140 | -4108.99833 | -4109.45663 | -4109.86516 | -4110.38000 |
| 9.45     | -4106.25921 | -4106.67597 | -4108.32124 | -4108.78862 | -4108.61948 | -4109.09118 | -4108.99814 | -4109.45644 | -4109.86504 | -4110.37985 |
| 9.54     | -4106.25912 | -4106.67575 | -4108.32101 | -4108.78838 | -4108.61930 | -4109.09098 | -4108.99798 | -4109.45628 | -4109.86494 | -4110.37973 |
| 9.64     | -4106.25904 | -4106.67555 | -4108.32080 | -4108.78817 | -4108.61914 | -4109.09080 | -4108.99784 | -4109.45613 | -4109.86486 | -4110.37962 |
| 9.73     | -4106.25896 | -4106.67536 | -4108.32061 | -4108.78797 | -4108.61899 | -4109.09065 | -4108.99771 | -4109.45600 | -4109.86479 | -4110.37953 |
| 9.83     | -4106.25890 | -4106.67518 | -4108.32044 | -4108.78779 | -4108.61887 | -4109.09051 | -4108.99760 | -4109.45588 | -4109.86473 | -4110.37945 |
| 9.92     | -4106.25883 | -4106.67502 | -4108.32029 | -4108.78762 | -4108.61875 | -4109.09038 | -4108.99750 | -4109.45577 | -4109.86468 | -4110.37938 |
| 10.02    | -4106.25878 | -4106.67488 | -4108.32015 | -4108.78748 | -4108.61866 | -4109.09027 | -4108.99742 | -4109.45568 | -4109.86465 | -4110.37933 |
| 10.11    | -4106.25873 | -4106.67474 | -4108.32002 | -4108.78734 | -4108.61857 | -4109.09017 | -4108.99734 | -4109.45559 | -4109.86461 | -4110.37928 |
| 10.20    | -4106.25868 | -4106.67461 | -4108.31991 | -4108.78722 | -4108.61848 | -4109.09007 | -4108.99727 | -4109.45551 | -4109.86459 | -4110.37924 |
| 10.30    | -4106.25864 | -4106.67449 | -4108.31981 | -4108.78711 | -4108.61842 | -4109.09000 | -4108.99721 | -4109.45545 | -4109.86457 | -4110.37920 |
| 10.39    | -4106.25860 | -4106.67438 | -4108.31972 | -4108.78701 | -4108.61836 | -4109.08992 | -4108.99716 | -4109.45539 | -4109.86456 | -4110.37917 |
| 10.49    | -4106.25856 | -4106.67427 | -4108.31963 | -4108.78692 | -4108.61831 | -4109.08986 | -4108.99711 | -4109.45534 | -4109.86455 | -4110.37914 |
| 10.58    | -4106.25853 | -4106.67418 | -4108.31956 | -4108.78684 | -4108.61826 | -4109.08981 | -4108.99708 | -4109.45529 | -4109.86455 | -4110.37912 |
| 10.68    | -4106.25850 | -4106.67409 | -4108.31950 | -4108.78677 | -4108.61823 | -4109.08976 | -4108.99705 | -4109.45526 | -4109.86455 | -4110.37911 |
| 10.77    | -4106.25847 | -4106.67400 | -4108.31944 | -4108.78670 | -4108.61819 | -4109.08972 | -4108.99702 | -4109.45522 | -4109.86455 | -4110.37909 |
| 10.87    | -4106.25845 | -4106.67392 | -4108.31938 | -4108.78664 | -4108.61816 | -4109.08968 | -4108.99700 | -4109.45519 | -4109.86455 | -4110.37908 |
| 10.96    | -4106.25842 | -4106.67384 | -4108.31933 | -4108.78658 | -4108.61813 | -4109.08964 | -4108.99698 | -4109.45517 | -4109.86455 | -4110.37907 |
| 11.05    | -4106.25840 | -4106.67377 | -4108.31928 | -4108.78653 | -4108.61811 | -4109.08961 | -4108.99696 | -4109.45514 | -4109.86455 | -4110.37906 |

Table S12: The absolute energies in hartree of the potential energy curve of NbSi in the  $^4\Pi$  state with a CASSCF wave function and nom-CPO active space.

| Distance | CASSCF      | CASPT2      | tpbe        | ftpbe       | trevpbe     | ftrevpbe    | tblyp       | ftblyp      | torelyp     | ftorelyp    |
|----------|-------------|-------------|-------------|-------------|-------------|-------------|-------------|-------------|-------------|-------------|
| 11.15    | -4106.25838 | -4106.67370 | -4108.31924 | -4108.78648 | -4108.61808 | -4109.08958 | -4108.99695 | -4109.45512 | -4109.86455 | -4110.37905 |
| 11.24    | -4106.25836 | -4106.67364 | -4108.31920 | -4108.78643 | -4108.61806 | -4109.08955 | -4108.99693 | -4109.45510 | -4109.86455 | -4110.37904 |
| 11.34    | -4106.25835 | -4106.67358 | -4108.31916 | -4108.78639 | -4108.61804 | -4109.08952 | -4108.99692 | -4109.45508 | -4109.86456 | -4110.37903 |
| 11.43    | -4106.25833 | -4106.67352 | -4108.31913 | -4108.78635 | -4108.61803 | -4109.08949 | -4108.99691 | -4109.45507 | -4109.86456 | -4110.37902 |
| 11.53    | -4106.25831 | -4106.67347 | -4108.31910 | -4108.78632 | -4108.61801 | -4109.08947 | -4108.99691 | -4109.45506 | -4109.86456 | -4110.37901 |
| 11.62    | -4106.25830 | -4106.67342 | -4108.31907 | -4108.78629 | -4108.61800 | -4109.08946 | -4108.99690 | -4109.45505 | -4109.86456 | -4110.37901 |
| 11.72    | -4106.25829 | -4106.67337 | -4108.31905 | -4108.78626 | -4108.61799 | -4109.08944 | -4108.99690 | -4109.45504 | -4109.86457 | -4110.37900 |
| 11.81    | -4106.25828 | -4106.67332 | -4108.31903 | -4108.78624 | -4108.61798 | -4109.08943 | -4108.99690 | -4109.45504 | -4109.86457 | -4110.37900 |
| 11.91    | -4106.25826 | -4106.67328 | -4108.31901 | -4108.78621 | -4108.61797 | -4109.08942 | -4108.99690 | -4109.45504 | -4109.86458 | -4110.37900 |
| 12.00    | -4106.25825 | -4106.67324 | -4108.31899 | -4108.78619 | -4108.61797 | -4109.08941 | -4108.99690 | -4109.45503 | -4109.86458 | -4110.37900 |
| 12.09    | -4106.25824 | -4106.67320 | -4108.31897 | -4108.78618 | -4108.61796 | -4109.08940 | -4108.99690 | -4109.45503 | -4109.86459 | -4110.37899 |
| 12.19    | -4106.25824 | -4106.67316 | -4108.31895 | -4108.78615 | -4108.61795 | -4109.08938 | -4108.99690 | -4109.45503 | -4109.86459 | -4110.37899 |
| 12.28    | -4106.25823 | -4106.67312 | -4108.31894 | -4108.78613 | -4108.61794 | -4109.08937 | -4108.99690 | -4109.45503 | -4109.86459 | -4110.37899 |
| 12.38    | -4106.25821 | -4106.67301 | -4108.31890 | -4108.78611 | -4108.61791 | -4109.08936 | -4108.99688 | -4109.45503 | -4109.86457 | -4110.37898 |
| 12.47    | -4106.25821 | -4106.67306 | -4108.31892 | -4108.78611 | -4108.61794 | -4109.08936 | -4108.99691 | -4109.45503 | -4109.86460 | -4110.37898 |
| 12.57    | -4106.25821 | -4106.67303 | -4108.31890 | -4108.78609 | -4108.61793 | -4109.08934 | -4108.99691 | -4109.45503 | -4109.86460 | -4110.37897 |
| 12.66    | -4106.25820 | -4106.67300 | -4108.31889 | -4108.78607 | -4108.61793 | -4109.08933 | -4108.99692 | -4109.45503 | -4109.86460 | -4110.37896 |
| 12.76    | -4106.25819 | -4106.67297 | -4108.31888 | -4108.78606 | -4108.61792 | -4109.08933 | -4108.99692 | -4109.45503 | -4109.86460 | -4110.37896 |
| 12.85    | -4106.25819 | -4106.67294 | -4108.31887 | -4108.78605 | -4108.61792 | -4109.08932 | -4108.99692 | -4109.45503 | -4109.86460 | -4110.37896 |
| 12.94    | -4106.25818 | -4106.67291 | -4108.31886 | -4108.78604 | -4108.61791 | -4109.08931 | -4108.99693 | -4109.45503 | -4109.86460 | -4110.37895 |
| 13.04    | -4106.25818 | -4106.67289 | -4108.31885 | -4108.78603 | -4108.61791 | -4109.08931 | -4108.99693 | -4109.45504 | -4109.86460 | -4110.37895 |
| 13.13    | -4106.25817 | -4106.67286 | -4108.31884 | -4108.78602 | -4108.61790 | -4109.08930 | -4108.99693 | -4109.45503 | -4109.86459 | -4110.37894 |
| 13.23    | -4106.25817 | -4106.67284 | -4108.31883 | -4108.78601 | -4108.61790 | -4109.08930 | -4108.99693 | -4109.45504 | -4109.86459 | -4110.37894 |
| 13.32    | -4106.25816 | -4106.67282 | -4108.31883 | -4108.78601 | -4108.61790 | -4109.08929 | -4108.99694 | -4109.45504 | -4109.86459 | -4110.37894 |
| 13.42    | -4106.25816 | -4106.67280 | -4108.31883 | -4108.78600 | -4108.61790 | -4109.08929 | -4108.99695 | -4109.45505 | -4109.86460 | -4110.37894 |
| 13.51    | -4106.25815 | -4106.67278 | -4108.31882 | -4108.78600 | -4108.61790 | -4109.08929 | -4108.99695 | -4109.45505 | -4109.86460 | -4110.37894 |
| 13.61    | -4106.25815 | -4106.67276 | -4108.31882 | -4108.78599 | -4108.61790 | -4109.08929 | -4108.99696 | -4109.45506 | -4109.86460 | -4110.37894 |
| 13.70    | -4106.25815 | -4106.67274 | -4108.31881 | -4108.78599 | -4108.61789 | -4109.08929 | -4108.99696 | -4109.45506 | -4109.86460 | -4110.37894 |
| 13.80    | -4106.25814 | -4106.67272 | -4108.31881 | -4108.78598 | -4108.61789 | -4109.08928 | -4108.99696 | -4109.45506 | -4109.86460 | -4110.37893 |
| 13.89    | -4106.25814 | -4106.67270 | -4108.31881 | -4108.78598 | -4108.61789 | -4109.08928 | -4108.99697 | -4109.45507 | -4109.86460 | -4110.37893 |
| 13.98    | -4106.25814 | -4106.67269 | -4108.31880 | -4108.78597 | -4108.61789 | -4109.08927 | -4108.99697 | -4109.45507 | -4109.86460 | -4110.37893 |
| 14.08    | -4106.25813 | -4106.67267 | -4108.31880 | -4108.78597 | -4108.61789 | -4109.08928 | -4108.99698 | -4109.45507 | -4109.86461 | -4110.37893 |
| 14.17    | -4106.25813 | -4106.67266 | -4108.31880 | -4108.78597 | -4108.61789 | -4109.08927 | -4108.99698 | -4109.45507 | -4109.86460 | -4110.37892 |
| 14.27    | -4106.25813 | -4106.67264 | -4108.31879 | -4108.78596 | -4108.61788 | -4109.08926 | -4108.99698 | -4109.45507 | -4109.86460 | -4110.37892 |
| 14.36    | -4106.25813 | -4106.67262 | -4108.31879 | -4108.78595 | -4108.61788 | -4109.08926 | -4108.99698 | -4109.45507 | -4109.86460 | -4110.37891 |
| 14.46    | -4106.25812 | -4106.67261 | -4108.31878 | -4108.78595 | -4108.61788 | -4109.08926 | -4108.99699 | -4109.45508 | -4109.86459 | -4110.37891 |
| 14.55    | -4106.25812 | -4106.67259 | -4108.31878 | -4108.78595 | -4108.61787 | -4109.08925 | -4108.99699 | -4109.45508 | -4109.86459 | -4110.37891 |
| 14.65    | -4106.25812 | -4106.67258 | -4108.31878 | -4108.78594 | -4108.61787 | -4109.08925 | -4108.99699 | -4109.45508 | -4109.86459 | -4110.37891 |
| 14.74    | -4106.25812 | -4106.67257 | -4108.31877 | -4108.78594 | -4108.61787 | -4109.08925 | -4108.99699 | -4109.45508 | -4109.86459 | -4110.37891 |
| 14.83    | -4106.25812 | -4106.67256 | -4108.31877 | -4108.78594 | -4108.61787 | -4109.08925 | -4108.99700 | -4109.45509 | -4109.86459 | -4110.37891 |
| 14.93    | -4106.25811 | -4106.67254 | -4108.31877 | -4108.78594 | -4108.61787 | -4109.08925 | -4108.99700 | -4109.45509 | -4109.86459 | -4110.37891 |
| 15.02    | -4106.25811 | -4106.67253 | -4108.31877 | -4108.78594 | -4108.61787 | -4109.08925 | -4108.99700 | -4109.45510 | -4109.86459 | -4110.37891 |
| 15.12    | -4106.25811 | -4106.67252 | -4108.31876 | -4108.78593 | -4108.61786 | -4109.08924 | -4108.99700 | -4109.45509 | -4109.86458 | -4110.37890 |
| 15.21    | -4106.25811 | -4106.67251 | -4108.31876 | -4108.78593 | -4108.61786 | -4109.08924 | -4108.99700 | -4109.45509 | -4109.86458 | -4110.37890 |
| 15.31    | -4106.25811 | -4106.67250 | -4108.31876 | -4108.78593 | -4108.61786 | -4109.08924 | -4108.99701 | -4109.45510 | -4109.86458 | -4110.37890 |
| 15.40    | -4106.25811 | -4106.67249 | -4108.31876 | -4108.78593 | -4108.61786 | -4109.08924 | -4108.99701 | -4109.45510 | -4109.86458 | -4110.37890 |
| 15.50    | -4106.25810 | -4106.67248 | -4108.31876 | -4108.78593 | -4108.61786 | -4109.08924 | -4108.99701 | -4109.45510 | -4109.86458 | -4110.37890 |
| 15.59    | -4106.25810 | -4106.67247 | -4108.31876 | -4108.78593 | -4108.61786 | -4109.08924 | -4108.99701 | -4109.45510 | -4109.86458 | -4110.37890 |
| 15.68    | -4106.25810 | -4106.67246 | -4108.31876 | -4108.78593 | -4108.61786 | -4109.08924 | -4108.99701 | -4109.45510 | -4109.86458 | -4110.37890 |
| 15.78    | -4106.25810 | -4106.67245 | -4108.31876 | -4108.78592 | -4108.61786 | -4109.08923 | -4108.99701 | -4109.45510 | -4109.86458 | -4110.37889 |
| 15.87    | -4106.25810 | -4106.67245 | -4108.31875 | -4108.78592 | -4108.61786 | -4109.08923 | -4108.99702 | -4109.45510 | -4109.86458 | -4110.37889 |
| 15.97    | -4106.25810 | -4106.67244 | -4108.31875 | -4108.78592 | -4108.61786 | -4109.08923 | -4108.99702 | -4109.45510 | -4109.86458 | -4110.37889 |



Table S12: The absolute energies in hartree of the potential energy curve of NbSi in the  $^4\Pi$  state with a CASSCF wave function and nom-CPO active space.

| Distance | CASSCF      | CASPT2      | tpbe        | ftpbe       | trevpbe     | ftrevpbe    | tblyp       | ftblyp      | torelyp     | ftorelyp    |
|----------|-------------|-------------|-------------|-------------|-------------|-------------|-------------|-------------|-------------|-------------|
| 16.06    | -4106.25810 | -4106.67243 | -4108.31875 | -4108.78592 | -4108.61786 | -4109.08923 | -4108.99702 | -4109.45511 | -4109.86458 | -4110.37889 |
| 16.16    | -4106.25810 | -4106.67243 | -4108.31875 | -4108.78592 | -4108.61785 | -4109.08923 | -4108.99702 | -4109.45511 | -4109.86458 | -4110.37889 |
| 16.25    | -4106.25810 | -4106.67242 | -4108.31875 | -4108.78592 | -4108.61785 | -4109.08923 | -4108.99702 | -4109.45511 | -4109.86458 | -4110.37889 |
| 16.35    | -4106.25809 | -4106.67242 | -4108.31875 | -4108.78592 | -4108.61785 | -4109.08923 | -4108.99702 | -4109.45511 | -4109.86458 | -4110.37889 |
| 16.44    | -4106.25809 | -4106.67241 | -4108.31875 | -4108.78592 | -4108.61785 | -4109.08923 | -4108.99702 | -4109.45511 | -4109.86458 | -4110.37889 |
| 16.54    | -4106.25809 | -4106.67240 | -4108.31875 | -4108.78591 | -4108.61785 | -4109.08923 | -4108.99702 | -4109.45511 | -4109.86458 | -4110.37889 |
| 16.63    | -4106.25809 | -4106.67240 | -4108.31875 | -4108.78591 | -4108.61785 | -4109.08923 | -4108.99703 | -4109.45511 | -4109.86457 | -4110.37889 |
| 16.72    | -4106.25809 | -4106.67239 | -4108.31875 | -4108.78591 | -4108.61785 | -4109.08923 | -4108.99703 | -4109.45511 | -4109.86457 | -4110.37889 |
| 16.82    | -4106.25809 | -4106.67239 | -4108.31875 | -4108.78591 | -4108.61785 | -4109.08923 | -4108.99703 | -4109.45511 | -4109.86457 | -4110.37889 |
| 16.91    | -4106.25809 | -4106.67239 | -4108.31875 | -4108.78591 | -4108.61785 | -4109.08923 | -4108.99703 | -4109.45511 | -4109.86458 | -4110.37889 |
| 17.01    | -4106.25809 | -4106.67238 | -4108.31875 | -4108.78591 | -4108.61785 | -4109.08923 | -4108.99703 | -4109.45512 | -4109.86457 | -4110.37888 |
| 17.10    | -4106.25809 | -4106.67238 | -4108.31875 | -4108.78591 | -4108.61785 | -4109.08923 | -4108.99703 | -4109.45512 | -4109.86457 | -4110.37888 |
| 17.20    | -4106.25809 | -4106.67237 | -4108.31875 | -4108.78592 | -4108.61785 | -4109.08923 | -4108.99703 | -4109.45512 | -4109.86458 | -4110.37889 |
| 17.29    | -4106.25809 | -4106.67237 | -4108.31875 | -4108.78592 | -4108.61785 | -4109.08923 | -4108.99704 | -4109.45512 | -4109.86458 | -4110.37889 |
| 17.39    | -4106.25809 | -4106.67237 | -4108.31875 | -4108.78592 | -4108.61786 | -4109.08923 | -4108.99704 | -4109.45512 | -4109.86458 | -4110.37889 |
| 17.48    | -4106.25809 | -4106.67236 | -4108.31875 | -4108.78592 | -4108.61786 | -4109.08923 | -4108.99704 | -4109.45512 | -4109.86458 | -4110.37889 |
| 17.57    | -4106.25809 | -4106.67236 | -4108.31875 | -4108.78592 | -4108.61786 | -4109.08923 | -4108.99704 | -4109.45512 | -4109.86458 | -4110.37889 |
| 17.67    | -4106.25808 | -4106.67236 | -4108.31875 | -4108.78592 | -4108.61786 | -4109.08923 | -4108.99704 | -4109.45512 | -4109.86458 | -4110.37889 |
| 17.76    | -4106.25808 | -4106.67235 | -4108.31875 | -4108.78592 | -4108.61785 | -4109.08923 | -4108.99704 | -4109.45512 | -4109.86458 | -4110.37889 |
| 17.86    | -4106.25808 | -4106.67235 | -4108.31875 | -4108.78592 | -4108.61785 | -4109.08923 | -4108.99704 | -4109.45512 | -4109.86458 | -4110.37889 |
| 17.95    | -4106.25808 | -4106.67235 | -4108.31875 | -4108.78591 | -4108.61785 | -4109.08923 | -4108.99704 | -4109.45512 | -4109.86458 | -4110.37888 |
| 18.05    | -4106.25808 | -4106.67234 | -4108.31875 | -4108.78591 | -4108.61785 | -4109.08923 | -4108.99704 | -4109.45512 | -4109.86458 | -4110.37888 |

Table S13: The absolute energies in hartree of the potential energy curve of NbSi in the  $^6\Sigma^+$  state with a CASSCF wave function and nom-CPO active space.

| Distance | CASSCF      | CASPT2      | tpbe        | ftpbe       | trevpbe     | ftrevpbe    | tblyp       | ftblyp      | torelyp     | ftorelyp    |
|----------|-------------|-------------|-------------|-------------|-------------|-------------|-------------|-------------|-------------|-------------|
| 1.98     | -4100.79633 | -4102.21485 | -4103.88577 | -4104.35732 | -4104.16275 | -4104.63842 | -4104.52495 | -4104.98834 | -4105.45846 | -4105.97683 |
| 2.08     | -4101.69595 | -4103.06915 | -4104.73184 | -4105.20292 | -4105.00997 | -4105.48522 | -4105.37244 | -4105.83510 | -4106.30103 | -4106.81895 |
| 2.17     | -4102.54888 | -4103.76125 | -4105.41586 | -4105.88649 | -4105.69512 | -4106.16996 | -4106.05784 | -4106.51982 | -4106.98178 | -4107.49928 |
| 2.27     | -4103.24033 | -4104.31920 | -4105.96671 | -4106.43698 | -4106.24709 | -4106.72160 | -4106.61005 | -4107.07147 | -4107.52963 | -4108.04684 |
| 2.36     | -4103.79813 | -4104.76784 | -4106.40953 | -4106.87955 | -4106.69096 | -4107.16527 | -4107.05417 | -4107.51519 | -4107.96970 | -4108.48679 |
| 2.46     | -4104.24700 | -4105.12851 | -4106.76593 | -4107.23583 | -4107.04837 | -4107.52262 | -4107.41177 | -4107.87254 | -4108.32362 | -4108.84078 |
| 2.55     | -4104.60824 | -4105.41893 | -4107.05382 | -4107.52374 | -4107.33721 | -4107.81156 | -4107.70067 | -4108.16135 | -4108.60915 | -4109.12659 |
| 2.65     | -4104.89973 | -4105.65221 | -4107.28788 | -4107.75805 | -4107.57220 | -4108.04694 | -4107.93526 | -4108.39606 | -4108.84064 | -4109.35875 |
| 2.74     | -4105.13646 | -4105.83649 | -4107.47721 | -4107.94820 | -4107.76252 | -4108.23828 | -4108.12456 | -4108.58563 | -4109.02735 | -4109.54681 |
| 2.83     | -4105.33205 | -4105.99178 | -4107.63494 | -4108.10657 | -4107.92111 | -4108.39770 | -4108.28248 | -4108.74359 | -4109.18317 | -4109.70370 |
| 2.93     | -4105.49658 | -4106.12527 | -4107.76899 | -4108.24092 | -4108.05584 | -4108.53294 | -4108.41684 | -4108.87782 | -4109.31536 | -4109.83667 |
| 3.02     | -4105.63510 | -4106.23913 | -4107.88283 | -4108.35481 | -4108.17024 | -4108.64762 | -4108.53104 | -4108.99177 | -4109.42735 | -4109.94924 |
| 3.12     | -4105.75175 | -4106.33143 | -4107.97714 | -4108.44829 | -4108.26516 | -4108.74151 | -4108.62709 | -4109.08784 | -4109.52331 | -4110.04316 |
| 3.21     | -4105.83513 | -4106.41466 | -4108.05978 | -4108.53058 | -4108.34809 | -4108.82440 | -4108.71007 | -4109.17024 | -4109.60402 | -4110.12393 |
| 3.31     | -4105.92100 | -4106.48552 | -4108.13015 | -4108.60047 | -4108.41874 | -4108.89477 | -4108.78085 | -4109.24046 | -4109.67276 | -4110.19238 |
| 3.40     | -4105.99411 | -4106.54556 | -4108.18978 | -4108.65959 | -4108.47866 | -4108.95427 | -4108.84102 | -4109.30006 | -4109.73107 | -4110.25019 |
| 3.50     | -4106.05627 | -4106.59616 | -4108.24016 | -4108.70945 | -4108.52934 | -4109.00447 | -4108.89199 | -4109.35050 | -4109.78040 | -4110.29895 |
| 3.59     | -4106.10897 | -4106.63859 | -4108.28252 | -4108.75132 | -4108.57202 | -4109.04664 | -4108.93499 | -4109.39300 | -4109.82191 | -4110.33988 |
| 3.68     | -4106.15345 | -4106.67395 | -4108.31795 | -4108.78625 | -4108.60775 | -4109.08186 | -4108.97109 | -4109.42862 | -4109.85661 | -4110.37402 |
| 3.78     | -4106.19081 | -4106.70322 | -4108.34744 | -4108.81526 | -4108.63755 | -4109.11113 | -4109.00129 | -4109.45835 | -4109.88552 | -4110.40234 |
| 3.87     | -4106.22199 | -4106.72728 | -4108.37192 | -4108.83922 | -4108.66232 | -4109.13533 | -4109.02651 | -4109.48308 | -4109.90948 | -4110.42571 |
| 3.97     | -4106.24782 | -4106.74692 | -4108.39213 | -4108.85887 | -4108.68281 | -4109.15518 | -4109.04751 | -4109.50356 | -4109.92923 | -4110.44480 |
| 4.06     | -4106.26905 | -4106.76276 | -4108.40859 | -4108.87479 | -4108.69953 | -4109.17130 | -4109.06475 | -4109.52030 | -4109.94526 | -4110.46023 |
| 4.16     | -4106.28632 | -4106.77524 | -4108.42165 | -4108.88742 | -4108.71284 | -4109.18414 | -4109.07853 | -4109.53366 | -4109.95797 | -4110.47244 |

Table S13: The absolute energies in hartree of the potential energy curve of NbSi in the  ${}^6\Sigma^+$  state with a CASSCF wave function and nom-CPO active space.

| Distance | CASSCF      | CASPT2      | tpbe        | ftpbe       | trevpbe     | ftrevpbe    | tblyp       | ftblyp      | torelyp     | ftorelyp    |
|----------|-------------|-------------|-------------|-------------|-------------|-------------|-------------|-------------|-------------|-------------|
| 4.35     | -4106.30018 | -4106.78483 | -4108.43178 | -4108.89721 | -4108.72321 | -4109.19413 | -4109.08932 | -4109.54412 | -4109.96780 | -4110.48187 |
| 4.44     | -4106.31111 | -4106.79194 | -4108.43940 | -4108.90455 | -4108.73106 | -4109.20168 | -4109.09757 | -4109.55209 | -4109.97519 | -4110.48892 |
| 4.54     | -4106.31952 | -4106.79698 | -4108.44489 | -4108.90981 | -4108.73678 | -4109.20715 | -4109.10366 | -4109.55796 | -4109.98051 | -4110.49395 |
| 4.63     | -4106.32577 | -4106.80026 | -4108.44860 | -4108.91333 | -4108.74071 | -4109.21086 | -4109.10795 | -4109.56205 | -4109.98409 | -4110.49728 |
| 4.72     | -4106.33018 | -4106.80207 | -4108.45084 | -4108.91540 | -4108.74314 | -4109.21312 | -4109.11074 | -4109.56468 | -4109.98624 | -4110.49921 |
| 4.82     | -4106.33304 | -4106.80265 | -4108.45183 | -4108.91626 | -4108.74433 | -4109.21416 | -4109.11228 | -4109.56608 | -4109.98718 | -4110.49996 |
| 4.91     | -4106.33459 | -4106.80220 | -4108.45178 | -4108.91610 | -4108.74447 | -4109.21417 | -4109.11276 | -4109.56645 | -4109.98713 | -4110.49973 |
| 5.01     | -4106.33505 | -4106.80092 | -4108.45086 | -4108.91509 | -4108.74373 | -4109.21333 | -4109.11237 | -4109.56595 | -4109.98623 | -4110.49869 |
| 5.10     | -4106.33459 | -4106.79895 | -4108.44925 | -4108.91340 | -4108.74229 | -4109.21180 | -4109.11126 | -4109.56476 | -4109.98466 | -4110.49699 |
| 5.20     | -4106.33337 | -4106.79643 | -4108.44708 | -4108.91118 | -4108.74028 | -4109.20973 | -4109.10959 | -4109.56302 | -4109.98257 | -4110.49478 |
| 5.29     | -4106.33154 | -4106.79347 | -4108.44448 | -4108.90853 | -4108.73784 | -4109.20724 | -4109.10747 | -4109.56085 | -4109.98007 | -4110.49218 |
| 5.39     | -4106.32922 | -4106.79017 | -4108.44153 | -4108.90555 | -4108.73503 | -4109.20440 | -4109.10499 | -4109.55832 | -4109.97723 | -4110.48926 |
| 5.48     | -4106.32649 | -4106.78662 | -4108.43830 | -4108.90230 | -4108.73195 | -4109.20129 | -4109.10222 | -4109.55552 | -4109.97414 | -4110.48610 |
| 5.57     | -4106.32346 | -4106.78290 | -4108.43489 | -4108.89889 | -4108.72868 | -4109.19801 | -4109.09926 | -4109.55253 | -4109.97088 | -4110.48280 |
| 5.67     | -4106.32020 | -4106.75452 | -4108.40063 | -4108.86502 | -4108.69531 | -4109.16533 | -4109.06315 | -4109.51545 | -4109.93588 | -4110.44690 |
| 5.76     | -4106.29507 | -4106.75089 | -4108.39763 | -4108.86204 | -4108.69246 | -4109.16256 | -4109.06046 | -4109.51271 | -4109.93288 | -4110.44397 |
| 5.86     | -4106.29317 | -4106.74730 | -4108.39468 | -4108.85911 | -4108.68965 | -4109.15982 | -4109.05782 | -4109.51002 | -4109.92997 | -4110.44111 |
| 5.95     | -4106.29117 | -4106.74381 | -4108.39184 | -4108.85630 | -4108.68696 | -4109.15718 | -4109.05529 | -4109.50744 | -4109.92719 | -4110.43839 |
| 6.05     | -4106.28910 | -4106.74045 | -4108.38916 | -4108.85362 | -4108.68440 | -4109.15466 | -4109.05292 | -4109.50500 | -4109.92460 | -4110.43584 |
| 6.14     | -4106.28698 | -4106.73726 | -4108.38670 | -4108.85115 | -4108.68205 | -4109.15234 | -4109.05076 | -4109.50276 | -4109.92224 | -4110.43351 |
| 6.24     | -4106.28482 | -4106.73428 | -4108.38455 | -4108.84898 | -4108.68000 | -4109.15031 | -4109.04891 | -4109.50080 | -4109.92023 | -4110.43151 |
| 6.33     | -4106.28265 | -4106.73172 | -4108.38289 | -4108.84726 | -4108.67842 | -4109.14873 | -4109.04754 | -4109.49926 | -4109.91874 | -4110.43000 |
| 6.43     | -4106.28049 | -4106.72952 | -4108.38191 | -4108.84616 | -4108.67749 | -4109.14775 | -4109.04684 | -4109.49828 | -4109.91797 | -4110.42912 |
| 6.52     | -4106.27836 | -4106.72824 | -4108.38227 | -4108.84629 | -4108.67786 | -4109.14797 | -4109.04746 | -4109.49838 | -4109.91864 | -4110.42951 |
| 6.61     | -4106.27630 | -4106.72763 | -4108.38357 | -4108.84723 | -4108.67909 | -4109.14898 | -4109.04901 | -4109.49917 | -4109.92034 | -4110.43069 |
| 6.71     | -4106.27438 | -4106.72634 | -4108.38345 | -4108.84689 | -4108.67892 | -4109.14870 | -4109.04918 | -4109.49886 | -4109.92048 | -4110.43045 |
| 6.80     | -4106.27267 | -4106.72463 | -4108.38224 | -4108.84556 | -4108.67769 | -4109.14744 | -4109.04827 | -4109.49770 | -4109.91942 | -4110.42921 |
| 6.90     | -4106.27117 | -4106.72278 | -4108.38070 | -4108.84395 | -4108.67615 | -4109.14591 | -4109.04704 | -4109.49634 | -4109.91795 | -4110.42764 |
| 6.99     | -4106.26987 | -4106.72095 | -4108.37903 | -4108.84224 | -4108.67449 | -4109.14427 | -4109.04567 | -4109.49489 | -4109.91633 | -4110.42596 |
| 7.09     | -4106.26874 | -4106.71920 | -4108.37736 | -4108.84053 | -4108.67284 | -4109.14263 | -4109.04428 | -4109.49345 | -4109.91469 | -4110.42429 |
| 7.18     | -4106.26774 | -4106.71756 | -4108.37574 | -4108.83888 | -4108.67126 | -4109.14105 | -4109.04292 | -4109.49206 | -4109.91312 | -4110.42268 |
| 7.28     | -4106.26687 | -4106.71603 | -4108.37421 | -4108.83731 | -4108.66976 | -4109.13956 | -4109.04163 | -4109.49075 | -4109.91164 | -4110.42117 |
| 7.37     | -4106.26611 | -4106.71463 | -4108.37277 | -4108.83585 | -4108.66838 | -4109.13817 | -4109.04042 | -4109.48952 | -4109.91028 | -4110.41978 |
| 7.46     | -4106.26544 | -4106.71335 | -4108.37145 | -4108.83449 | -4108.66711 | -4109.13688 | -4109.03931 | -4109.48838 | -4109.90904 | -4110.41849 |
| 7.56     | -4106.26485 | -4106.71217 | -4108.37024 | -4108.83324 | -4108.66594 | -4109.13570 | -4109.03829 | -4109.48733 | -4109.90791 | -4110.41732 |
| 7.65     | -4106.26433 | -4106.71109 | -4108.36913 | -4108.83210 | -4108.66490 | -4109.13462 | -4109.03736 | -4109.48638 | -4109.90691 | -4110.41627 |
| 7.75     | -4106.26387 | -4106.71011 | -4108.36813 | -4108.83106 | -4108.66395 | -4109.13365 | -4109.03652 | -4109.48551 | -4109.90602 | -4110.41533 |
| 7.84     | -4106.26346 | -4106.68584 | -4108.33291 | -4108.80013 | -4108.63040 | -4109.10175 | -4109.00717 | -4109.46531 | -4109.87582 | -4110.39012 |
| 7.94     | -4106.25270 | -4106.68504 | -4108.33194 | -4108.79918 | -4108.62949 | -4109.10083 | -4109.00661 | -4109.46490 | -4109.87519 | -4110.38948 |
| 8.03     | -4106.25219 | -4106.68432 | -4108.33108 | -4108.79834 | -4108.62869 | -4109.10002 | -4109.00610 | -4109.46448 | -4109.87460 | -4110.38888 |
| 8.13     | -4106.25175 | -4106.68367 | -4108.33030 | -4108.79758 | -4108.62797 | -4109.09930 | -4109.00563 | -4109.46408 | -4109.87407 | -4110.38834 |
| 8.22     | -4106.25137 | -4106.68307 | -4108.32959 | -4108.79688 | -4108.62733 | -4109.09865 | -4109.00519 | -4109.46369 | -4109.87358 | -4110.38785 |
| 8.31     | -4106.25103 | -4106.68253 | -4108.32895 | -4108.79625 | -4108.62675 | -4109.09807 | -4109.00478 | -4109.46332 | -4109.87315 | -4110.38741 |
| 8.41     | -4106.25073 | -4106.68203 | -4108.32837 | -4108.79567 | -4108.62622 | -4109.09754 | -4109.00442 | -4109.46298 | -4109.87277 | -4110.38701 |
| 8.50     | -4106.25046 | -4106.68156 | -4108.32784 | -4108.79514 | -4108.62575 | -4109.09706 | -4109.00408 | -4109.46266 | -4109.87243 | -4110.38666 |
| 8.60     | -4106.25022 | -4106.68112 | -4108.32736 | -4108.79466 | -4108.62533 | -4109.09663 | -4109.00378 | -4109.46237 | -4109.87213 | -4110.38635 |
| 8.69     | -4106.25000 | -4106.68072 | -4108.32693 | -4108.79421 | -4108.62495 | -4109.09624 | -4109.00350 | -4109.46210 | -4109.87187 | -4110.38607 |
| 8.79     | -4106.24981 | -4106.68035 | -4108.32652 | -4108.79380 | -4108.62460 | -4109.09588 | -4109.00324 | -4109.46185 | -4109.87163 | -4110.38582 |
| 8.88     | -4106.24963 | -4106.68001 | -4108.32615 | -4108.79343 | -4108.62429 | -4109.09556 | -4109.00301 | -4109.46162 | -4109.87143 | -4110.38560 |
| 8.98     | -4106.24947 | -4106.67969 | -4108.32582 | -4108.79308 | -4108.62400 | -4109.09526 | -4109.00280 | -4109.46141 | -4109.87124 | -4110.38540 |
| 9.07     | -4106.24933 | -4106.67940 | -4108.32551 | -4108.79276 | -4108.62374 | -4109.09499 | -4109.00260 | -4109.46121 | -4109.87108 | -4110.38523 |
| 9.17     | -4106.24919 | -4106.67912 | -4108.32522 | -4108.79247 | -4108.62351 | -4109.09475 | -4109.00242 | -4109.46103 | -4109.87095 | -4110.38507 |

Table S13: The absolute energies in hartree of the potential energy curve of NbSi in the  ${}^6\Sigma^+$  state with a CASSCF wave function and nom-CPO active space.

| Distance | CASSCF      | CASPT2      | tpbe        | ftpbe       | trevpbe     | ftrevpbe    | tblyp       | ftblyp      | torelyp     | ftorelyp    |
|----------|-------------|-------------|-------------|-------------|-------------|-------------|-------------|-------------|-------------|-------------|
| 9.26     | -4106.24907 | -4106.67887 | -4108.32496 | -4108.79220 | -4108.62330 | -4109.09453 | -4109.00226 | -4109.46087 | -4109.87083 | -4110.38493 |
| 9.35     | -4106.24896 | -4106.67863 | -4108.32473 | -4108.79196 | -4108.62312 | -4109.09433 | -4109.00212 | -4109.46072 | -4109.87073 | -4110.38482 |
| 9.45     | -4106.24886 | -4106.67841 | -4108.32453 | -4108.79174 | -4108.62296 | -4109.09416 | -4109.00200 | -4109.46059 | -4109.87065 | -4110.38472 |
| 9.54     | -4106.24877 | -4106.67820 | -4108.32434 | -4108.79155 | -4108.62282 | -4109.09401 | -4109.00189 | -4109.46047 | -4109.87059 | -4110.38463 |
| 9.64     | -4106.24869 | -4106.67801 | -4108.32417 | -4108.79137 | -4108.62269 | -4109.09387 | -4109.00180 | -4109.46037 | -4109.87054 | -4110.38456 |
| 9.73     | -4106.24861 | -4106.67783 | -4108.32402 | -4108.79120 | -4108.62258 | -4109.09374 | -4109.00171 | -4109.46027 | -4109.87050 | -4110.38450 |
| 9.83     | -4106.24854 | -4106.67767 | -4108.32387 | -4108.79105 | -4108.62247 | -4109.09363 | -4109.00163 | -4109.46018 | -4109.87046 | -4110.38444 |
| 9.92     | -4106.24848 | -4106.67751 | -4108.32374 | -4108.79090 | -4108.62238 | -4109.09352 | -4109.00156 | -4109.46010 | -4109.87043 | -4110.38439 |
| 10.02    | -4106.24842 | -4106.67737 | -4108.32362 | -4108.79077 | -4108.62230 | -4109.09342 | -4109.00150 | -4109.46003 | -4109.87040 | -4110.38435 |
| 10.11    | -4106.24836 | -4106.67723 | -4108.32351 | -4108.79065 | -4108.62222 | -4109.09333 | -4109.00144 | -4109.45996 | -4109.87038 | -4110.38431 |
| 10.20    | -4106.24831 | -4106.67711 | -4108.32341 | -4108.79054 | -4108.62215 | -4109.09325 | -4109.00139 | -4109.45990 | -4109.87037 | -4110.38428 |
| 10.30    | -4106.24827 | -4106.67698 | -4108.32331 | -4108.79044 | -4108.62209 | -4109.09318 | -4109.00135 | -4109.45985 | -4109.87036 | -4110.38426 |
| 10.39    | -4106.24822 | -4106.67687 | -4108.32323 | -4108.79035 | -4108.62204 | -4109.09312 | -4109.00131 | -4109.45980 | -4109.87035 | -4110.38423 |
| 10.49    | -4106.24818 | -4106.67677 | -4108.32316 | -4108.79027 | -4108.62200 | -4109.09307 | -4109.00128 | -4109.45977 | -4109.87035 | -4110.38421 |
| 10.58    | -4106.24815 | -4106.67667 | -4108.32310 | -4108.79020 | -4108.62197 | -4109.09303 | -4109.00125 | -4109.45973 | -4109.87036 | -4110.38420 |
| 10.68    | -4106.24811 | -4106.67658 | -4108.32304 | -4108.79013 | -4108.62194 | -4109.09299 | -4109.00123 | -4109.45971 | -4109.87037 | -4110.38419 |
| 10.77    | -4106.24808 | -4106.67649 | -4108.32299 | -4108.79008 | -4108.62191 | -4109.09295 | -4109.00122 | -4109.45969 | -4109.87038 | -4110.38418 |
| 10.87    | -4106.24805 | -4106.67641 | -4108.32294 | -4108.79002 | -4108.62189 | -4109.09292 | -4109.00121 | -4109.45966 | -4109.87038 | -4110.38417 |
| 10.96    | -4106.24802 | -4106.67633 | -4108.32290 | -4108.78997 | -4108.62187 | -4109.09288 | -4109.00120 | -4109.45965 | -4109.87039 | -4110.38416 |
| 11.05    | -4106.24800 | -4106.67626 | -4108.32286 | -4108.78992 | -4108.62184 | -4109.09285 | -4109.00119 | -4109.45963 | -4109.87040 | -4110.38415 |
| 11.15    | -4106.24798 | -4106.67619 | -4108.32282 | -4108.78987 | -4108.62183 | -4109.09282 | -4109.00118 | -4109.45961 | -4109.87040 | -4110.38415 |
| 11.24    | -4106.24795 | -4106.67612 | -4108.32278 | -4108.78982 | -4108.62181 | -4109.09279 | -4109.00117 | -4109.45959 | -4109.87041 | -4110.38414 |
| 11.34    | -4106.24793 | -4106.67606 | -4108.32275 | -4108.78978 | -4108.62179 | -4109.09277 | -4109.00116 | -4109.45958 | -4109.87041 | -4110.38413 |
| 11.43    | -4106.24791 | -4106.67600 | -4108.32272 | -4108.78974 | -4108.62178 | -4109.09274 | -4109.00116 | -4109.45957 | -4109.87042 | -4110.38412 |
| 11.53    | -4106.24790 | -4106.67595 | -4108.32269 | -4108.78971 | -4108.62177 | -4109.09273 | -4109.00116 | -4109.45956 | -4109.87042 | -4110.38412 |
| 11.62    | -4106.24788 | -4106.67590 | -4108.32266 | -4108.78968 | -4108.62175 | -4109.09271 | -4109.00115 | -4109.45955 | -4109.87043 | -4110.38411 |
| 11.72    | -4106.24786 | -4106.67585 | -4108.32264 | -4108.78966 | -4108.62175 | -4109.09270 | -4109.00116 | -4109.45955 | -4109.87043 | -4110.38410 |
| 11.81    | -4106.24785 | -4106.67580 | -4108.32263 | -4108.78964 | -4108.62174 | -4109.09269 | -4109.00116 | -4109.45955 | -4109.87044 | -4110.38410 |
| 11.91    | -4106.24784 | -4106.67575 | -4108.32261 | -4108.78962 | -4108.62174 | -4109.09268 | -4109.00117 | -4109.45955 | -4109.87046 | -4110.38410 |
| 12.00    | -4106.24782 | -4106.67571 | -4108.32260 | -4108.78960 | -4108.62174 | -4109.09267 | -4109.00118 | -4109.45956 | -4109.87047 | -4110.38410 |
| 12.09    | -4106.24781 | -4106.67567 | -4108.32259 | -4108.78959 | -4108.62174 | -4109.09267 | -4109.00118 | -4109.45956 | -4109.87047 | -4110.38410 |
| 12.19    | -4106.24780 | -4106.67563 | -4108.32258 | -4108.78957 | -4108.62174 | -4109.09266 | -4109.00119 | -4109.45956 | -4109.87048 | -4110.38410 |
| 12.28    | -4106.24779 | -4106.67560 | -4108.32256 | -4108.78956 | -4108.62173 | -4109.09265 | -4109.00120 | -4109.45957 | -4109.87049 | -4110.38410 |
| 12.38    | -4106.24778 | -4106.67556 | -4108.32255 | -4108.78954 | -4108.62173 | -4109.09264 | -4109.00120 | -4109.45957 | -4109.87049 | -4110.38410 |
| 12.47    | -4106.24777 | -4106.67553 | -4108.32254 | -4108.78953 | -4108.62173 | -4109.09263 | -4109.00121 | -4109.45957 | -4109.87050 | -4110.38409 |
| 12.57    | -4106.24776 | -4106.67550 | -4108.32253 | -4108.78951 | -4108.62173 | -4109.09262 | -4109.00121 | -4109.45957 | -4109.87050 | -4110.38409 |
| 12.66    | -4106.24775 | -4106.67547 | -4108.32252 | -4108.78950 | -4108.62172 | -4109.09261 | -4109.00122 | -4109.45957 | -4109.87050 | -4110.38408 |
| 12.76    | -4106.24775 | -4106.67544 | -4108.32251 | -4108.78949 | -4108.62172 | -4109.09260 | -4109.00122 | -4109.45957 | -4109.87050 | -4110.38407 |
| 12.85    | -4106.24774 | -4106.67541 | -4108.32250 | -4108.78947 | -4108.62171 | -4109.09260 | -4109.00123 | -4109.45957 | -4109.87050 | -4110.38407 |
| 12.94    | -4106.24773 | -4106.67538 | -4108.32250 | -4108.78946 | -4108.62171 | -4109.09259 | -4109.00123 | -4109.45958 | -4109.87050 | -4110.38406 |
| 13.04    | -4106.24772 | -4106.67536 | -4108.32249 | -4108.78946 | -4108.62171 | -4109.09259 | -4109.00124 | -4109.45958 | -4109.87050 | -4110.38406 |
| 13.13    | -4106.24772 | -4106.67533 | -4108.32248 | -4108.78945 | -4108.62171 | -4109.09258 | -4109.00125 | -4109.45958 | -4109.87051 | -4110.38406 |
| 13.23    | -4106.24771 | -4106.67531 | -4108.32248 | -4108.78944 | -4108.62171 | -4109.09258 | -4109.00125 | -4109.45959 | -4109.87051 | -4110.38406 |
| 13.32    | -4106.24771 | -4106.67529 | -4108.32248 | -4108.78944 | -4108.62171 | -4109.09258 | -4109.00126 | -4109.45960 | -4109.87051 | -4110.38406 |
| 13.42    | -4106.24770 | -4106.67527 | -4108.32247 | -4108.78944 | -4108.62171 | -4109.09258 | -4109.00127 | -4109.45960 | -4109.87052 | -4110.38406 |
| 13.51    | -4106.24770 | -4106.67525 | -4108.32247 | -4108.78944 | -4108.62171 | -4109.09258 | -4109.00128 | -4109.45961 | -4109.87052 | -4110.38406 |
| 13.61    | -4106.24769 | -4106.67523 | -4108.32247 | -4108.78943 | -4108.62171 | -4109.09258 | -4109.00129 | -4109.45962 | -4109.87053 | -4110.38406 |
| 13.70    | -4106.24769 | -4106.67521 | -4108.32247 | -4108.78943 | -4108.62172 | -4109.09258 | -4109.00130 | -4109.45962 | -4109.87053 | -4110.38406 |
| 13.80    | -4106.24768 | -4106.67519 | -4108.32247 | -4108.78943 | -4108.62172 | -4109.09258 | -4109.00130 | -4109.45963 | -4109.87053 | -4110.38406 |
| 13.89    | -4106.24768 | -4106.67517 | -4108.32247 | -4108.78942 | -4108.62172 | -4109.09258 | -4109.00131 | -4109.45963 | -4109.87053 | -4110.38406 |
| 13.98    | -4106.24767 | -4106.67516 | -4108.32246 | -4108.78942 | -4108.62172 | -4109.09257 | -4109.00131 | -4109.45964 | -4109.87053 | -4110.38405 |
| 14.08    | -4106.24767 | -4106.67514 | -4108.32246 | -4108.78942 | -4108.62172 | -4109.09257 | -4109.00132 | -4109.45964 | -4109.87053 | -4110.38405 |

Table S13: The absolute energies in hartree of the potential energy curve of NbSi in the  ${}^6\Sigma^+$  state with a CASSCF wave function and nom-CPO active space.

| Distance | CASSCF      | CASPT2      | tpbe        | ftpbe       | trevpbe     | ftrevpbe    | tblyp       | ftblyp      | torelyp     | ftorelyp    |
|----------|-------------|-------------|-------------|-------------|-------------|-------------|-------------|-------------|-------------|-------------|
| 14.17    | -4106.24767 | -4106.67513 | -4108.32246 | -4108.78941 | -4108.62171 | -4109.09257 | -4109.00132 | -4109.45964 | -4109.87053 | -4110.38405 |
| 14.27    | -4106.24766 | -4106.67511 | -4108.32246 | -4108.78941 | -4108.62171 | -4109.09256 | -4109.00133 | -4109.45964 | -4109.87053 | -4110.38404 |
| 14.36    | -4106.24766 | -4106.67510 | -4108.32245 | -4108.78940 | -4108.62171 | -4109.09256 | -4109.00133 | -4109.45965 | -4109.87053 | -4110.38404 |
| 14.46    | -4106.24765 | -4106.67509 | -4108.32245 | -4108.78940 | -4108.62171 | -4109.09256 | -4109.00133 | -4109.45965 | -4109.87053 | -4110.38404 |
| 14.55    | -4106.24765 | -4106.67507 | -4108.32245 | -4108.78940 | -4108.62171 | -4109.09256 | -4109.00134 | -4109.45965 | -4109.87053 | -4110.38404 |
| 14.65    | -4106.24765 | -4106.67506 | -4108.32245 | -4108.78940 | -4108.62171 | -4109.09256 | -4109.00134 | -4109.45966 | -4109.87053 | -4110.38404 |
| 14.74    | -4106.24765 | -4106.67505 | -4108.32244 | -4108.78940 | -4108.62171 | -4109.09256 | -4109.00135 | -4109.45966 | -4109.87053 | -4110.38403 |
| 14.83    | -4106.24764 | -4106.67504 | -4108.32244 | -4108.78939 | -4108.62171 | -4109.09255 | -4109.00135 | -4109.45966 | -4109.87053 | -4110.38403 |
| 14.93    | -4106.24764 | -4106.67503 | -4108.32244 | -4108.78939 | -4108.62171 | -4109.09255 | -4109.00135 | -4109.45967 | -4109.87053 | -4110.38403 |
| 15.02    | -4106.24764 | -4106.67502 | -4108.32244 | -4108.78939 | -4108.62171 | -4109.09255 | -4109.00136 | -4109.45967 | -4109.87053 | -4110.38404 |
| 15.12    | -4106.24764 | -4106.67501 | -4108.32244 | -4108.78939 | -4108.62171 | -4109.09256 | -4109.00136 | -4109.45967 | -4109.87053 | -4110.38404 |
| 15.21    | -4106.24763 | -4106.67500 | -4108.32244 | -4108.78939 | -4108.62171 | -4109.09256 | -4109.00137 | -4109.45968 | -4109.87053 | -4110.38404 |
| 15.31    | -4106.24763 | -4106.67499 | -4108.32244 | -4108.78939 | -4108.62171 | -4109.09256 | -4109.00137 | -4109.45968 | -4109.87053 | -4110.38404 |
| 15.40    | -4106.24763 | -4106.67498 | -4108.32245 | -4108.78939 | -4108.62171 | -4109.09256 | -4109.00138 | -4109.45969 | -4109.87053 | -4110.38404 |
| 15.50    | -4106.24763 | -4106.67497 | -4108.32245 | -4108.78939 | -4108.62171 | -4109.09256 | -4109.00138 | -4109.45969 | -4109.87054 | -4110.38404 |
| 15.59    | -4106.24762 | -4106.67496 | -4108.32245 | -4108.78939 | -4108.62171 | -4109.09256 | -4109.00138 | -4109.45969 | -4109.87054 | -4110.38403 |
| 15.68    | -4106.24762 | -4106.67496 | -4108.32245 | -4108.78939 | -4108.62171 | -4109.09256 | -4109.00139 | -4109.45969 | -4109.87054 | -4110.38403 |
| 15.78    | -4106.24762 | -4106.67495 | -4108.32244 | -4108.78939 | -4108.62171 | -4109.09255 | -4109.00139 | -4109.45969 | -4109.87054 | -4110.38403 |
| 15.87    | -4106.24762 | -4106.67494 | -4108.32244 | -4108.78939 | -4108.62171 | -4109.09255 | -4109.00139 | -4109.45970 | -4109.87054 | -4110.38403 |
| 15.97    | -4106.24762 | -4106.67493 | -4108.32244 | -4108.78939 | -4108.62171 | -4109.09255 | -4109.00139 | -4109.45970 | -4109.87053 | -4110.38403 |
| 16.06    | -4106.24762 | -4106.67492 | -4108.32244 | -4108.78939 | -4108.62171 | -4109.09255 | -4109.00139 | -4109.45970 | -4109.87053 | -4110.38403 |
| 16.16    | -4106.24761 | -4106.67492 | -4108.32244 | -4108.78939 | -4108.62171 | -4109.09255 | -4109.00140 | -4109.45970 | -4109.87053 | -4110.38403 |
| 16.25    | -4106.24761 | -4106.67491 | -4108.32244 | -4108.78939 | -4108.62171 | -4109.09255 | -4109.00140 | -4109.45970 | -4109.87053 | -4110.38403 |
| 16.35    | -4106.24761 | -4106.67491 | -4108.32244 | -4108.78939 | -4108.62171 | -4109.09255 | -4109.00140 | -4109.45970 | -4109.87053 | -4110.38403 |
| 16.44    | -4106.24761 | -4106.67490 | -4108.32244 | -4108.78939 | -4108.62171 | -4109.09255 | -4109.00140 | -4109.45970 | -4109.87053 | -4110.38403 |
| 16.54    | -4106.24761 | -4106.67490 | -4108.32244 | -4108.78938 | -4108.62171 | -4109.09255 | -4109.00140 | -4109.45970 | -4109.87053 | -4110.38402 |
| 16.63    | -4106.24761 | -4106.67489 | -4108.32244 | -4108.78938 | -4108.62171 | -4109.09255 | -4109.00140 | -4109.45970 | -4109.87053 | -4110.38402 |
| 16.72    | -4106.24761 | -4106.67489 | -4108.32244 | -4108.78938 | -4108.62171 | -4109.09254 | -4109.00140 | -4109.45970 | -4109.87053 | -4110.38402 |
| 16.82    | -4106.24760 | -4106.67488 | -4108.32244 | -4108.78938 | -4108.62171 | -4109.09254 | -4109.00140 | -4109.45971 | -4109.87053 | -4110.38402 |
| 16.91    | -4106.24760 | -4106.67488 | -4108.32244 | -4108.78938 | -4108.62171 | -4109.09254 | -4109.00140 | -4109.45971 | -4109.87053 | -4110.38402 |
| 17.01    | -4106.24760 | -4106.67487 | -4108.32244 | -4108.78938 | -4108.62171 | -4109.09254 | -4109.00141 | -4109.45971 | -4109.87053 | -4110.38402 |
| 17.10    | -4106.24760 | -4106.67487 | -4108.32244 | -4108.78938 | -4108.62171 | -4109.09255 | -4109.00141 | -4109.45971 | -4109.87053 | -4110.38402 |
| 17.20    | -4106.24760 | -4106.67487 | -4108.32244 | -4108.78938 | -4108.62171 | -4109.09255 | -4109.00141 | -4109.45971 | -4109.87053 | -4110.38402 |
| 17.29    | -4106.24760 | -4106.67486 | -4108.32244 | -4108.78938 | -4108.62171 | -4109.09255 | -4109.00141 | -4109.45971 | -4109.87053 | -4110.38402 |
| 17.39    | -4106.24760 | -4106.67486 | -4108.32244 | -4108.78938 | -4108.62171 | -4109.09255 | -4109.00141 | -4109.45971 | -4109.87053 | -4110.38402 |
| 17.48    | -4106.24760 | -4106.67486 | -4108.32244 | -4108.78938 | -4108.62171 | -4109.09255 | -4109.00141 | -4109.45972 | -4109.87053 | -4110.38402 |
| 17.57    | -4106.24760 | -4106.67485 | -4108.32244 | -4108.78938 | -4108.62171 | -4109.09255 | -4109.00142 | -4109.45972 | -4109.87053 | -4110.38402 |
| 17.67    | -4106.24760 | -4106.67485 | -4108.32244 | -4108.78938 | -4108.62171 | -4109.09255 | -4109.00142 | -4109.45972 | -4109.87053 | -4110.38402 |
| 17.76    | -4106.24760 | -4106.67485 | -4108.32244 | -4108.78938 | -4108.62171 | -4109.09255 | -4109.00142 | -4109.45972 | -4109.87053 | -4110.38402 |
| 17.86    | -4106.24759 | -4106.67484 | -4108.32244 | -4108.78938 | -4108.62171 | -4109.09255 | -4109.00142 | -4109.45972 | -4109.87053 | -4110.38402 |
| 17.95    | -4106.24759 | -4106.67484 | -4108.32244 | -4108.78938 | -4108.62171 | -4109.09255 | -4109.00142 | -4109.45972 | -4109.87053 | -4110.38402 |
| 18.05    | -4106.24759 | -4106.67484 | -4108.32244 | -4108.78938 | -4108.62171 | -4109.09255 | -4109.00142 | -4109.45972 | -4109.87053 | -4110.38402 |

Table S14: The absolute energies in hartree of the potential energy curve of NbSi in the  ${}^2\Sigma^+$  state with a CASSCF wave function and nom-CPO active space.

| Distance | CASSCF      | CASPT2      | tpbe        | ftpbe       | trevpbe     | ftrevpbe    | tblyp       | ftblyp      | torelyp     | ftorelyp    |
|----------|-------------|-------------|-------------|-------------|-------------|-------------|-------------|-------------|-------------|-------------|
| 1.98     | -4102.90780 | -4103.38580 | -4105.09589 | -4105.56728 | -4105.37836 | -4105.85046 | -4105.73339 | -4106.20238 | -4106.68025 | -4107.19645 |
| 2.08     | -4103.56272 | -4104.03926 | -4105.74164 | -4106.21259 | -4106.02503 | -4106.49678 | -4106.38109 | -4106.84941 | -4107.32149 | -4107.83733 |
| 2.17     | -4104.08849 | -4104.56391 | -4106.25899 | -4106.72960 | -4106.54321 | -4107.01476 | -4106.90020 | -4107.36787 | -4107.83452 | -4108.35020 |
| 2.27     | -4104.50978 | -4104.98577 | -4106.67342 | -4107.14391 | -4106.95823 | -4107.42993 | -4107.31626 | -4107.78360 | -4108.24453 | -4108.76060 |

Table S14: The absolute energies in hartree of the potential energy curve of NbSi in the  $^2\Sigma^+$  state with a CASSCF wave function and nom-CPO active space.

| Distance | CASSCF      | CASPT2      | tpbe        | ftpbe       | trevpbe     | ftrevpbe    | tblyp       | ftblyp      | torelyp     | ftorelyp    |
|----------|-------------|-------------|-------------|-------------|-------------|-------------|-------------|-------------|-------------|-------------|
| 2.36     | -4104.84989 | -4105.33076 | -4107.00927 | -4107.48010 | -4107.29414 | -4107.76667 | -4107.65413 | -4108.12216 | -4108.57511 | -4109.09278 |
| 2.46     | -4105.12878 | -4105.60975 | -4107.28300 | -4107.75289 | -4107.56852 | -4108.03979 | -4107.93009 | -4108.39728 | -4108.84613 | -4109.36230 |
| 2.55     | -4105.36279 | -4105.82707 | -4107.49393 | -4107.96193 | -4107.78062 | -4108.24870 | -4108.14292 | -4108.60982 | -4109.05720 | -4109.56924 |
| 2.65     | -4105.54784 | -4106.01061 | -4107.67528 | -4108.14334 | -4107.96286 | -4108.43108 | -4108.32443 | -4108.79121 | -4109.23711 | -4109.74929 |
| 2.74     | -4105.69758 | -4106.15839 | -4107.82170 | -4108.28999 | -4108.11016 | -4108.57870 | -4108.47109 | -4108.93793 | -4109.38239 | -4109.89490 |
| 2.83     | -4105.82033 | -4106.27886 | -4107.94194 | -4108.41227 | -4108.23144 | -4108.70244 | -4108.59060 | -4109.05869 | -4109.50169 | -4110.01661 |
| 2.93     | -4105.92181 | -4106.37643 | -4108.03902 | -4108.50955 | -4108.32940 | -4108.80073 | -4108.68792 | -4109.15590 | -4109.59810 | -4110.11326 |
| 3.02     | -4106.00495 | -4106.45700 | -4108.11922 | -4108.58970 | -4108.41037 | -4108.88173 | -4108.76852 | -4109.23622 | -4109.67758 | -4110.19273 |
| 3.12     | -4106.07282 | -4106.52344 | -4108.18546 | -4108.65578 | -4108.47728 | -4108.94858 | -4108.83519 | -4109.30253 | -4109.74311 | -4110.25817 |
| 3.21     | -4106.12801 | -4106.57807 | -4108.24002 | -4108.71014 | -4108.53245 | -4109.00362 | -4108.89019 | -4109.35712 | -4109.79699 | -4110.31192 |
| 3.31     | -4106.17267 | -4106.62283 | -4108.28481 | -4108.75467 | -4108.57781 | -4109.04879 | -4108.93541 | -4109.40189 | -4109.84119 | -4110.35590 |
| 3.40     | -4106.20863 | -4106.65938 | -4108.32151 | -4108.79100 | -4108.61502 | -4109.08571 | -4108.97253 | -4109.43848 | -4109.87738 | -4110.39174 |
| 3.50     | -4106.23745 | -4106.68910 | -4108.35150 | -4108.82047 | -4108.64551 | -4109.11573 | -4109.00298 | -4109.46828 | -4109.90703 | -4110.42081 |
| 3.59     | -4106.26046 | -4106.71301 | -4108.37589 | -4108.84416 | -4108.67036 | -4109.13990 | -4109.02788 | -4109.49241 | -4109.93126 | -4110.44417 |
| 3.68     | -4106.27230 | -4106.73181 | -4108.39529 | -4108.86274 | -4108.69020 | -4109.15890 | -4109.04792 | -4109.51162 | -4109.95070 | -4110.46253 |
| 3.78     | -4106.28871 | -4106.74598 | -4108.41043 | -4108.87695 | -4108.70576 | -4109.17348 | -4109.06386 | -4109.52680 | -4109.96623 | -4110.47678 |
| 3.87     | -4106.30155 | -4106.75653 | -4108.42180 | -4108.88804 | -4108.71754 | -4109.18500 | -4109.07594 | -4109.53855 | -4109.97757 | -4110.48771 |
| 3.97     | -4106.30953 | -4106.76428 | -4108.43045 | -4108.89675 | -4108.72654 | -4109.19416 | -4109.08536 | -4109.54794 | -4109.98594 | -4110.49614 |
| 4.06     | -4106.31862 | -4106.76968 | -4108.43663 | -4108.90324 | -4108.73296 | -4109.20104 | -4109.09237 | -4109.55511 | -4109.99148 | -4110.50216 |
| 4.16     | -4106.31782 | -4106.77316 | -4108.44070 | -4108.90758 | -4108.73718 | -4109.20568 | -4109.09728 | -4109.56011 | -4109.99476 | -4110.50594 |
| 4.35     | -4106.32877 | -4106.77506 | -4108.44315 | -4108.91018 | -4108.73971 | -4109.20850 | -4109.10055 | -4109.56334 | -4109.99634 | -4110.50793 |
| 4.44     | -4106.32934 | -4106.77562 | -4108.44423 | -4108.91133 | -4108.74082 | -4109.20984 | -4109.10247 | -4109.56512 | -4109.99647 | -4110.50840 |
| 4.54     | -4106.32894 | -4106.77504 | -4108.44414 | -4108.91127 | -4108.74069 | -4109.20991 | -4109.10325 | -4109.56568 | -4109.99520 | -4110.50745 |
| 4.63     | -4106.32778 | -4106.77322 | -4108.44257 | -4108.90973 | -4108.73889 | -4109.20838 | -4109.10273 | -4109.56485 | -4109.99167 | -4110.50435 |
| 4.72     | -4106.32606 | -4106.76951 | -4108.43827 | -4108.90554 | -4108.73417 | -4109.20412 | -4109.09954 | -4109.56132 | -4109.98459 | -4110.49774 |
| 4.82     | -4106.32392 | -4106.76552 | -4108.43362 | -4108.90106 | -4108.72929 | -4109.19973 | -4109.09561 | -4109.55714 | -4109.97808 | -4110.49161 |
| 4.91     | -4106.32149 | -4106.76140 | -4108.42874 | -4108.89642 | -4108.72426 | -4109.19528 | -4109.09126 | -4109.55262 | -4109.97175 | -4110.48575 |
| 5.01     | -4106.31888 | -4106.75699 | -4108.42330 | -4108.89128 | -4108.71872 | -4109.19041 | -4109.08624 | -4109.54746 | -4109.96506 | -4110.47963 |
| 5.10     | -4106.31615 | -4106.75236 | -4108.41771 | -4108.88596 | -4108.71309 | -4109.18537 | -4109.08098 | -4109.54205 | -4109.95844 | -4110.47356 |
| 5.20     | -4106.31338 | -4106.74765 | -4108.41223 | -4108.88068 | -4108.70760 | -4109.18038 | -4109.07579 | -4109.53671 | -4109.95215 | -4110.46772 |
| 5.29     | -4106.31058 | -4106.74294 | -4108.40692 | -4108.87553 | -4108.70231 | -4109.17550 | -4109.07075 | -4109.53152 | -4109.94621 | -4110.46214 |
| 5.39     | -4106.30778 | -4106.73830 | -4108.40182 | -4108.87056 | -4108.69727 | -4109.17078 | -4109.06592 | -4109.52656 | -4109.94064 | -4110.45687 |
| 5.48     | -4106.30498 | -4106.73376 | -4108.39695 | -4108.86578 | -4108.69247 | -4109.16624 | -4109.06132 | -4109.52183 | -4109.93542 | -4110.45189 |
| 5.57     | -4106.30218 | -4106.72933 | -4108.39230 | -4108.86120 | -4108.68791 | -4109.16187 | -4109.05695 | -4109.51733 | -4109.93053 | -4110.44718 |
| 5.67     | -4106.29938 | -4106.72502 | -4108.38786 | -4108.85680 | -4108.68356 | -4109.15768 | -4109.05280 | -4109.51306 | -4109.92594 | -4110.44273 |
| 5.76     | -4106.29660 | -4106.72083 | -4108.38362 | -4108.85260 | -4108.67942 | -4109.15365 | -4109.04886 | -4109.50900 | -4109.92161 | -4110.43852 |
| 5.86     | -4106.29384 | -4106.71676 | -4108.37958 | -4108.84856 | -4108.67547 | -4109.14979 | -4109.04511 | -4109.50514 | -4109.91754 | -4110.43453 |
| 5.95     | -4106.29112 | -4106.71282 | -4108.37572 | -4108.84471 | -4108.67171 | -4109.14609 | -4109.04156 | -4109.50147 | -4109.91369 | -4110.43074 |
| 6.05     | -4106.28843 | -4106.70900 | -4108.37204 | -4108.84102 | -4108.66813 | -4109.14255 | -4109.03819 | -4109.49800 | -4109.91006 | -4110.42716 |
| 6.14     | -4106.28578 | -4106.70531 | -4108.36852 | -4108.83749 | -4108.66470 | -4109.13914 | -4109.03499 | -4109.49470 | -4109.90662 | -4110.42376 |
| 6.24     | -4106.28320 | -4106.70175 | -4108.36517 | -4108.83411 | -4108.66144 | -4109.13589 | -4109.03197 | -4109.49157 | -4109.90338 | -4110.42055 |
| 6.33     | -4106.28068 | -4106.69832 | -4108.36198 | -4108.83090 | -4108.65834 | -4109.13278 | -4109.02912 | -4109.48863 | -4109.90032 | -4110.41751 |
| 6.43     | -4106.27823 | -4106.69504 | -4108.35895 | -4108.82785 | -4108.65540 | -4109.12983 | -4109.02644 | -4109.48587 | -4109.89744 | -4110.41466 |
| 6.52     | -4106.27586 | -4106.69190 | -4108.35608 | -4108.82493 | -4108.65261 | -4109.12699 | -4109.02392 | -4109.48327 | -4109.89473 | -4110.41197 |
| 6.61     | -4106.27359 | -4106.68892 | -4108.35335 | -4108.82217 | -4108.64996 | -4109.12429 | -4109.02156 | -4109.48084 | -4109.89220 | -4110.40944 |
| 6.71     | -4106.27141 | -4106.68609 | -4108.35079 | -4108.81957 | -4108.64746 | -4109.12175 | -4109.01938 | -4109.47859 | -4109.88983 | -4110.40710 |
| 6.80     | -4106.26934 | -4106.68341 | -4108.34836 | -4108.81711 | -4108.64511 | -4109.11933 | -4109.01735 | -4109.47652 | -4109.88763 | -4110.40491 |
| 6.90     | -4106.26739 | -4106.68091 | -4108.34608 | -4108.81477 | -4108.64290 | -4109.11703 | -4109.01549 | -4109.47460 | -4109.88559 | -4110.40287 |
| 6.99     | -4106.26556 | -4106.67857 | -4108.34393 | -4108.81256 | -4108.64081 | -4109.11484 | -4109.01377 | -4109.47284 | -4109.88369 | -4110.40097 |
| 7.09     | -4106.26386 | -4106.67639 | -4108.34189 | -4108.81048 | -4108.63883 | -4109.11277 | -4109.01219 | -4109.47124 | -4109.88193 | -4110.39921 |
| 7.18     | -4106.26228 | -4106.67439 | -4108.33997 | -4108.80849 | -4108.63697 | -4109.11078 | -4109.01075 | -4109.46977 | -4109.88031 | -4110.39754 |
| 7.28     | -4106.26084 | -4106.67255 | -4108.33815 | -4108.80658 | -4108.63520 | -4109.10886 | -4109.00941 | -4109.46841 | -4109.87880 | -4110.39597 |

Table S14: The absolute energies in hartree of the potential energy curve of NbSi in the  $2\Sigma^+$  state with a CASSCF wave function and nom-CPO active space.

| Distance | CASSCF      | CASPT2      | tpbe        | ftpbe       | trevpbe     | ftrevpbe    | tblyp       | ftblyp      | torelyp     | ftorelyp    |
|----------|-------------|-------------|-------------|-------------|-------------|-------------|-------------|-------------|-------------|-------------|
| 7.37     | -4106.25951 | -4106.67088 | -4108.33641 | -4108.80477 | -4108.63353 | -4109.10702 | -4109.00819 | -4109.46718 | -4109.87739 | -4110.39449 |
| 7.46     | -4106.25831 | -4106.66937 | -4108.33475 | -4108.80303 | -4108.63192 | -4109.10525 | -4109.00704 | -4109.46603 | -4109.87608 | -4110.39307 |
| 7.56     | -4106.25723 | -4106.66800 | -4108.33314 | -4108.80133 | -4108.63037 | -4109.10352 | -4109.00596 | -4109.46494 | -4109.87483 | -4110.39168 |
| 7.65     | -4106.25625 | -4106.66678 | -4108.33159 | -4108.79969 | -4108.62888 | -4109.10183 | -4109.00493 | -4109.46392 | -4109.87365 | -4110.39033 |
| 7.75     | -4106.25537 | -4106.66569 | -4108.33009 | -4108.79810 | -4108.62744 | -4109.10020 | -4109.00395 | -4109.46295 | -4109.87252 | -4110.38902 |
| 7.84     | -4106.25459 | -4106.66473 | -4108.32865 | -4108.79658 | -4108.62606 | -4109.09864 | -4109.00300 | -4109.46203 | -4109.87146 | -4110.38776 |
| 7.94     | -4106.25388 | -4106.66387 | -4108.32727 | -4108.79513 | -4108.62475 | -4109.09715 | -4109.00211 | -4109.46116 | -4109.87046 | -4110.38655 |
| 8.03     | -4106.25325 | -4106.66312 | -4108.32597 | -4108.79376 | -4108.62351 | -4109.09575 | -4109.00126 | -4109.46034 | -4109.86954 | -4110.38541 |
| 8.13     | -4106.25269 | -4106.66246 | -4108.32475 | -4108.79248 | -4108.62236 | -4109.09444 | -4109.00047 | -4109.45958 | -4109.86869 | -4110.38435 |
| 8.22     | -4106.25219 | -4106.66187 | -4108.32363 | -4108.79132 | -4108.62131 | -4109.09326 | -4108.99974 | -4109.45889 | -4109.86793 | -4110.38340 |
| 8.31     | -4106.25174 | -4106.66136 | -4108.32261 | -4108.79028 | -4108.62037 | -4109.09221 | -4108.99908 | -4109.45828 | -4109.86727 | -4110.38255 |
| 8.41     | -4106.25133 | -4106.66089 | -4108.32171 | -4108.78935 | -4108.61954 | -4109.09128 | -4108.99850 | -4109.45773 | -4109.86670 | -4110.38182 |
| 8.50     | -4106.25097 | -4106.66047 | -4108.32091 | -4108.78853 | -4108.61881 | -4109.09047 | -4108.99799 | -4109.45725 | -4109.86621 | -4110.38119 |
| 8.60     | -4106.25065 | -4106.66008 | -4108.32021 | -4108.78781 | -4108.61818 | -4109.08977 | -4108.99754 | -4109.45683 | -4109.86580 | -4110.38066 |
| 8.69     | -4106.25037 | -4106.65973 | -4108.31960 | -4108.78719 | -4108.61763 | -4109.08918 | -4108.99715 | -4109.45647 | -4109.86546 | -4110.38022 |
| 8.79     | -4106.25011 | -4106.65940 | -4108.31907 | -4108.78665 | -4108.61717 | -4109.08867 | -4108.99682 | -4109.45615 | -4109.86517 | -4110.37984 |
| 8.88     | -4106.24989 | -4106.65909 | -4108.31860 | -4108.78617 | -4108.61676 | -4109.08822 | -4108.99652 | -4109.45587 | -4109.86493 | -4110.37953 |
| 8.98     | -4106.24968 | -4106.65880 | -4108.31818 | -4108.78575 | -4108.61640 | -4109.08784 | -4108.99626 | -4109.45562 | -4109.86473 | -4110.37927 |
| 9.07     | -4106.24950 | -4106.65853 | -4108.31782 | -4108.78538 | -4108.61610 | -4109.08751 | -4108.99603 | -4109.45539 | -4109.86456 | -4110.37905 |
| 9.17     | -4106.24934 | -4106.65828 | -4108.31749 | -4108.78504 | -4108.61583 | -4109.08721 | -4108.99582 | -4109.45519 | -4109.86442 | -4110.37886 |
| 9.26     | -4106.24919 | -4106.65805 | -4108.31721 | -4108.78475 | -4108.61560 | -4109.08696 | -4108.99566 | -4109.45503 | -4109.86431 | -4110.37871 |
| 9.35     | -4106.24906 | -4106.65783 | -4108.31696 | -4108.78450 | -4108.61541 | -4109.08675 | -4108.99551 | -4109.45488 | -4109.86423 | -4110.37859 |
| 9.45     | -4106.24895 | -4106.65763 | -4108.31674 | -4108.78427 | -4108.61523 | -4109.08656 | -4108.99538 | -4109.45475 | -4109.86415 | -4110.37848 |
| 9.54     | -4106.24884 | -4106.65744 | -4108.31655 | -4108.78406 | -4108.61508 | -4109.08639 | -4108.99527 | -4109.45463 | -4109.86410 | -4110.37839 |
| 9.64     | -4106.24874 | -4106.65726 | -4108.31637 | -4108.78388 | -4108.61495 | -4109.08625 | -4108.99517 | -4109.45453 | -4109.86405 | -4110.37832 |
| 9.73     | -4106.24865 | -4106.65709 | -4108.31621 | -4108.78371 | -4108.61484 | -4109.08612 | -4108.99508 | -4109.45443 | -4109.86402 | -4110.37826 |
| 9.83     | -4106.24857 | -4106.65692 | -4108.31606 | -4108.78355 | -4108.61473 | -4109.08599 | -4108.99500 | -4109.45434 | -4109.86398 | -4110.37820 |
| 9.92     | -4106.24850 | -4106.65678 | -4108.31594 | -4108.78342 | -4108.61465 | -4109.08590 | -4108.99494 | -4109.45428 | -4109.86397 | -4110.37817 |
| 10.02    | -4106.24844 | -4106.65664 | -4108.31583 | -4108.78330 | -4108.61457 | -4109.08581 | -4108.99489 | -4109.45421 | -4109.86396 | -4110.37813 |
| 10.11    | -4106.24837 | -4106.65651 | -4108.31573 | -4108.78319 | -4108.61451 | -4109.08573 | -4108.99484 | -4109.45416 | -4109.86395 | -4110.37811 |
| 10.20    | -4106.24832 | -4106.65639 | -4108.31564 | -4108.78309 | -4108.61445 | -4109.08566 | -4108.99480 | -4109.45411 | -4109.86395 | -4110.37809 |
| 10.30    | -4106.24827 | -4106.65628 | -4108.31556 | -4108.78300 | -4108.61441 | -4109.08560 | -4108.99477 | -4109.45407 | -4109.86396 | -4110.37807 |
| 10.39    | -4106.24822 | -4106.65617 | -4108.31549 | -4108.78292 | -4108.61437 | -4109.08555 | -4108.99474 | -4109.45403 | -4109.86397 | -4110.37806 |
| 10.49    | -4106.24818 | -4106.65606 | -4108.31542 | -4108.78285 | -4108.61433 | -4109.08550 | -4108.99471 | -4109.45400 | -4109.86397 | -4110.37804 |
| 10.58    | -4106.24814 | -4106.65597 | -4108.31536 | -4108.78278 | -4108.61429 | -4109.08545 | -4108.99469 | -4109.45397 | -4109.86398 | -4110.37804 |
| 10.68    | -4106.24810 | -4106.65587 | -4108.31531 | -4108.78272 | -4108.61427 | -4109.08542 | -4108.99468 | -4109.45395 | -4109.86399 | -4110.37803 |
| 10.77    | -4106.24807 | -4106.65579 | -4108.31526 | -4108.78266 | -4108.61424 | -4109.08538 | -4108.99467 | -4109.45393 | -4109.86400 | -4110.37803 |
| 10.87    | -4106.24804 | -4106.65571 | -4108.31522 | -4108.78261 | -4108.61422 | -4109.08535 | -4108.99466 | -4109.45391 | -4109.86401 | -4110.37802 |
| 10.96    | -4106.24801 | -4106.65563 | -4108.31518 | -4108.78257 | -4108.61421 | -4109.08533 | -4108.99465 | -4109.45390 | -4109.86403 | -4110.37802 |
| 11.05    | -4106.24799 | -4106.65556 | -4108.31515 | -4108.78253 | -4108.61420 | -4109.08531 | -4108.99465 | -4109.45389 | -4109.86404 | -4110.37802 |
| 11.15    | -4106.24796 | -4106.65549 | -4108.31511 | -4108.78249 | -4108.61418 | -4109.08528 | -4108.99464 | -4109.45388 | -4109.86406 | -4110.37802 |
| 11.24    | -4106.24794 | -4106.65542 | -4108.31509 | -4108.78246 | -4108.61417 | -4109.08527 | -4108.99465 | -4109.45387 | -4109.86407 | -4110.37802 |
| 11.34    | -4106.24792 | -4106.65536 | -4108.31506 | -4108.78243 | -4108.61416 | -4109.08525 | -4108.99465 | -4109.45387 | -4109.86408 | -4110.37802 |
| 11.43    | -4106.24790 | -4106.65530 | -4108.31504 | -4108.78239 | -4108.61416 | -4109.08523 | -4108.99465 | -4109.45386 | -4109.86409 | -4110.37802 |
| 11.53    | -4106.24788 | -4106.65525 | -4108.31502 | -4108.78237 | -4108.61415 | -4109.08522 | -4108.99465 | -4109.45386 | -4109.86411 | -4110.37802 |
| 11.62    | -4106.24787 | -4106.65520 | -4108.31500 | -4108.78235 | -4108.61415 | -4109.08521 | -4108.99466 | -4109.45386 | -4109.86412 | -4110.37802 |
| 11.72    | -4106.24785 | -4106.65515 | -4108.31498 | -4108.78232 | -4108.61414 | -4109.08519 | -4108.99466 | -4109.45386 | -4109.86412 | -4110.37802 |
| 11.81    | -4106.24784 | -4106.65510 | -4108.31496 | -4108.78230 | -4108.61413 | -4109.08519 | -4108.99467 | -4109.45386 | -4109.86413 | -4110.37802 |
| 11.91    | -4106.24782 | -4106.65506 | -4108.31495 | -4108.78229 | -4108.61414 | -4109.08518 | -4108.99468 | -4109.45387 | -4109.86415 | -4110.37803 |
| 12.00    | -4106.24781 | -4106.65502 | -4108.31494 | -4108.78227 | -4108.61413 | -4109.08517 | -4108.99468 | -4109.45387 | -4109.86415 | -4110.37802 |
| 12.09    | -4106.24780 | -4106.65498 | -4108.31493 | -4108.78226 | -4108.61413 | -4109.08517 | -4108.99469 | -4109.45387 | -4109.86416 | -4110.37802 |
| 12.19    | -4106.24779 | -4106.65494 | -4108.31492 | -4108.78224 | -4108.61413 | -4109.08516 | -4108.99470 | -4109.45388 | -4109.86418 | -4110.37803 |

Table S14: The absolute energies in hartree of the potential energy curve of NbSi in the  $^2\Sigma^+$  state with a CASSCF wave function and nom-CPO active space.

| Distance | CASSCF      | CASPT2      | tpbe        | ftpbe       | trevpbe     | ftrevpbe    | tblyp       | ftblyp      | torelyp     | ftorelyp    |
|----------|-------------|-------------|-------------|-------------|-------------|-------------|-------------|-------------|-------------|-------------|
| 12.28    | -4106.24778 | -4106.65491 | -4108.31491 | -4108.78223 | -4108.61413 | -4109.08515 | -4108.99471 | -4109.45388 | -4109.86418 | -4110.37803 |
| 12.38    | -4106.24777 | -4106.65487 | -4108.31489 | -4108.78221 | -4108.61412 | -4109.08514 | -4108.99471 | -4109.45388 | -4109.86418 | -4110.37801 |
| 12.47    | -4106.24776 | -4106.65485 | -4108.31490 | -4108.78221 | -4108.61413 | -4109.08515 | -4108.99473 | -4109.45390 | -4109.86420 | -4110.37803 |
| 12.57    | -4106.24775 | -4106.65481 | -4108.31488 | -4108.78220 | -4108.61413 | -4109.08514 | -4108.99473 | -4109.45390 | -4109.86420 | -4110.37803 |
| 12.66    | -4106.24774 | -4106.65479 | -4108.31488 | -4108.78219 | -4108.61413 | -4109.08513 | -4108.99474 | -4109.45390 | -4109.86421 | -4110.37802 |
| 12.76    | -4106.24773 | -4106.65476 | -4108.31487 | -4108.78218 | -4108.61413 | -4109.08513 | -4108.99475 | -4109.45391 | -4109.86421 | -4110.37802 |
| 12.85    | -4106.24773 | -4106.65473 | -4108.31486 | -4108.78217 | -4108.61412 | -4109.08512 | -4108.99475 | -4109.45391 | -4109.86421 | -4110.37802 |
| 12.94    | -4106.24772 | -4106.65471 | -4108.31486 | -4108.78217 | -4108.61412 | -4109.08512 | -4108.99476 | -4109.45392 | -4109.86422 | -4110.37802 |
| 13.04    | -4106.24771 | -4106.65468 | -4108.31485 | -4108.78216 | -4108.61412 | -4109.08512 | -4108.99477 | -4109.45392 | -4109.86422 | -4110.37802 |
| 13.13    | -4106.24771 | -4106.65466 | -4108.31485 | -4108.78215 | -4108.61412 | -4109.08511 | -4108.99477 | -4109.45392 | -4109.86422 | -4110.37801 |
| 13.23    | -4106.24770 | -4106.65463 | -4108.31485 | -4108.78215 | -4108.61412 | -4109.08511 | -4108.99479 | -4109.45394 | -4109.86423 | -4110.37802 |
| 13.32    | -4106.24770 | -4106.65461 | -4108.31484 | -4108.78215 | -4108.61412 | -4109.08511 | -4108.99479 | -4109.45394 | -4109.86423 | -4110.37802 |
| 13.42    | -4106.24769 | -4106.65459 | -4108.31484 | -4108.78214 | -4108.61413 | -4109.08511 | -4108.99480 | -4109.45395 | -4109.86424 | -4110.37802 |
| 13.51    | -4106.24769 | -4106.65457 | -4108.31484 | -4108.78214 | -4108.61413 | -4109.08511 | -4108.99481 | -4109.45396 | -4109.86424 | -4110.37802 |
| 13.61    | -4106.24768 | -4106.65455 | -4108.31484 | -4108.78214 | -4108.61413 | -4109.08511 | -4108.99482 | -4109.45396 | -4109.86424 | -4110.37802 |
| 13.70    | -4106.24768 | -4106.65453 | -4108.31483 | -4108.78213 | -4108.61413 | -4109.08511 | -4108.99482 | -4109.45396 | -4109.86424 | -4110.37802 |
| 13.80    | -4106.24767 | -4106.65452 | -4108.31483 | -4108.78213 | -4108.61413 | -4109.08510 | -4108.99483 | -4109.45397 | -4109.86424 | -4110.37801 |
| 13.89    | -4106.24767 | -4106.65450 | -4108.31483 | -4108.78212 | -4108.61412 | -4109.08510 | -4108.99483 | -4109.45397 | -4109.86425 | -4110.37801 |
| 13.98    | -4106.24766 | -4106.65449 | -4108.31483 | -4108.78212 | -4108.61412 | -4109.08510 | -4108.99484 | -4109.45398 | -4109.86425 | -4110.37801 |
| 14.08    | -4106.24766 | -4106.65447 | -4108.31483 | -4108.78212 | -4108.61412 | -4109.08510 | -4108.99484 | -4109.45398 | -4109.86425 | -4110.37801 |
| 14.17    | -4106.24766 | -4106.65446 | -4108.31482 | -4108.78212 | -4108.61412 | -4109.08510 | -4108.99485 | -4109.45399 | -4109.86425 | -4110.37801 |
| 14.27    | -4106.24765 | -4106.65444 | -4108.31482 | -4108.78212 | -4108.61412 | -4109.08510 | -4108.99485 | -4109.45399 | -4109.86425 | -4110.37801 |
| 14.36    | -4106.24765 | -4106.65443 | -4108.31482 | -4108.78211 | -4108.61412 | -4109.08510 | -4108.99486 | -4109.45400 | -4109.86425 | -4110.37801 |
| 14.46    | -4106.24765 | -4106.65442 | -4108.31482 | -4108.78211 | -4108.61412 | -4109.08509 | -4108.99486 | -4109.45400 | -4109.86425 | -4110.37801 |
| 14.55    | -4106.24764 | -4106.65441 | -4108.31482 | -4108.78211 | -4108.61412 | -4109.08509 | -4108.99487 | -4109.45400 | -4109.86425 | -4110.37801 |
| 14.65    | -4106.24764 | -4106.65440 | -4108.31482 | -4108.78211 | -4108.61412 | -4109.08509 | -4108.99487 | -4109.45401 | -4109.86425 | -4110.37801 |
| 14.74    | -4106.24764 | -4106.65439 | -4108.31482 | -4108.78211 | -4108.61412 | -4109.08509 | -4108.99488 | -4109.45401 | -4109.86425 | -4110.37801 |
| 14.83    | -4106.24764 | -4106.65438 | -4108.31482 | -4108.78211 | -4108.61413 | -4109.08509 | -4108.99488 | -4109.45402 | -4109.86426 | -4110.37801 |
| 14.93    | -4106.24763 | -4106.65436 | -4108.31482 | -4108.78211 | -4108.61413 | -4109.08509 | -4108.99489 | -4109.45402 | -4109.86426 | -4110.37801 |
| 15.02    | -4106.24763 | -4106.65435 | -4108.31482 | -4108.78211 | -4108.61413 | -4109.08509 | -4108.99489 | -4109.45402 | -4109.86426 | -4110.37801 |
| 15.12    | -4106.24763 | -4106.65434 | -4108.31482 | -4108.78211 | -4108.61413 | -4109.08509 | -4108.99489 | -4109.45403 | -4109.86426 | -4110.37801 |
| 15.21    | -4106.24763 | -4106.65433 | -4108.31482 | -4108.78211 | -4108.61413 | -4109.08509 | -4108.99490 | -4109.45403 | -4109.86426 | -4110.37801 |
| 15.31    | -4106.24763 | -4106.65432 | -4108.31482 | -4108.78211 | -4108.61413 | -4109.08509 | -4108.99490 | -4109.45403 | -4109.86426 | -4110.37801 |
| 15.40    | -4106.24762 | -4106.65432 | -4108.31482 | -4108.78211 | -4108.61413 | -4109.08509 | -4108.99490 | -4109.45403 | -4109.86426 | -4110.37801 |
| 15.50    | -4106.24762 | -4106.65431 | -4108.31482 | -4108.78211 | -4108.61413 | -4109.08509 | -4108.99491 | -4109.45404 | -4109.86426 | -4110.37801 |
| 15.59    | -4106.24762 | -4106.65430 | -4108.31482 | -4108.78211 | -4108.61413 | -4109.08509 | -4108.99491 | -4109.45404 | -4109.86426 | -4110.37801 |
| 15.68    | -4106.24762 | -4106.65429 | -4108.31482 | -4108.78211 | -4108.61413 | -4109.08509 | -4108.99492 | -4109.45405 | -4109.86426 | -4110.37801 |
| 15.78    | -4106.24762 | -4106.65429 | -4108.31482 | -4108.78211 | -4108.61413 | -4109.08509 | -4108.99492 | -4109.45405 | -4109.86426 | -4110.37801 |
| 15.87    | -4106.24761 | -4106.65345 | -4108.31482 | -4108.78211 | -4108.61413 | -4109.08509 | -4108.99492 | -4109.45405 | -4109.86426 | -4110.37801 |
| 15.97    | -4106.24761 | -4106.65344 | -4108.31482 | -4108.78211 | -4108.61413 | -4109.08509 | -4108.99492 | -4109.45405 | -4109.86426 | -4110.37801 |
| 16.06    | -4106.24761 | -4106.65343 | -4108.31482 | -4108.78211 | -4108.61413 | -4109.08509 | -4108.99493 | -4109.45405 | -4109.86426 | -4110.37801 |
| 16.16    | -4106.24761 | -4106.65343 | -4108.31482 | -4108.78211 | -4108.61413 | -4109.08509 | -4108.99493 | -4109.45406 | -4109.86427 | -4110.37801 |
| 16.25    | -4106.24761 | -4106.65342 | -4108.31482 | -4108.78211 | -4108.61413 | -4109.08509 | -4108.99493 | -4109.45406 | -4109.86427 | -4110.37801 |
| 16.35    | -4106.24761 | -4106.65341 | -4108.31482 | -4108.78211 | -4108.61413 | -4109.08510 | -4108.99494 | -4109.45406 | -4109.86427 | -4110.37801 |
| 16.44    | -4106.24761 | -4106.65341 | -4108.31482 | -4108.78211 | -4108.61413 | -4109.08510 | -4108.99494 | -4109.45407 | -4109.86427 | -4110.37801 |
| 16.54    | -4106.24761 | -4106.65340 | -4108.31482 | -4108.78211 | -4108.61414 | -4109.08510 | -4108.99494 | -4109.45407 | -4109.86427 | -4110.37801 |
| 16.63    | -4106.24760 | -4106.65339 | -4108.31482 | -4108.78211 | -4108.61414 | -4109.08510 | -4108.99494 | -4109.45407 | -4109.86427 | -4110.37801 |
| 16.72    | -4106.24760 | -4106.65337 | -4108.31482 | -4108.78211 | -4108.61414 | -4109.08510 | -4108.99494 | -4109.45407 | -4109.86427 | -4110.37801 |
| 16.82    | -4106.24760 | -4106.65337 | -4108.31482 | -4108.78211 | -4108.61413 | -4109.08510 | -4108.99495 | -4109.45407 | -4109.86427 | -4110.37801 |
| 16.91    | -4106.24760 | -4106.65336 | -4108.31482 | -4108.78211 | -4108.61413 | -4109.08509 | -4108.99495 | -4109.45407 | -4109.86427 | -4110.37801 |
| 17.01    | -4106.24760 | -4106.65332 | -4108.31482 | -4108.78211 | -4108.61413 | -4109.08509 | -4108.99495 | -4109.45407 | -4109.86427 | -4110.37801 |
| 17.10    | -4106.24760 | -4106.65332 | -4108.31482 | -4108.78211 | -4108.61413 | -4109.08509 | -4108.99495 | -4109.45408 | -4109.86427 | -4110.37801 |

Table S14: The absolute energies in hartree of the potential energy curve of NbSi in the  $^2\Sigma^+$  state with a CASSCF wave function and nom-CPO active space.

| Distance | CASSCF      | CASPT2      | tpbe        | ftpbe       | trevpbe     | ftrevpbe    | tblyp       | ftblyp      | torelyp     | ftorelyp    |
|----------|-------------|-------------|-------------|-------------|-------------|-------------|-------------|-------------|-------------|-------------|
| 17.20    | -4106.24760 | -4106.65332 | -4108.31482 | -4108.78211 | -4108.61413 | -4109.08509 | -4108.99495 | -4109.45408 | -4109.86427 | -4110.37801 |
| 17.29    | -4106.24760 | -4106.65328 | -4108.31482 | -4108.78211 | -4108.61413 | -4109.08509 | -4108.99495 | -4109.45408 | -4109.86427 | -4110.37801 |
| 17.39    | -4106.24760 | -4106.65327 | -4108.31482 | -4108.78211 | -4108.61413 | -4109.08509 | -4108.99495 | -4109.45408 | -4109.86427 | -4110.37801 |
| 17.48    | -4106.24760 | -4106.65326 | -4108.31482 | -4108.78211 | -4108.61413 | -4109.08509 | -4108.99495 | -4109.45408 | -4109.86427 | -4110.37801 |
| 17.57    | -4106.24759 | -4106.65326 | -4108.31482 | -4108.78211 | -4108.61414 | -4109.08509 | -4108.99496 | -4109.45408 | -4109.86427 | -4110.37801 |
| 17.67    | -4106.24759 | -4106.65326 | -4108.31482 | -4108.78211 | -4108.61414 | -4109.08509 | -4108.99496 | -4109.45408 | -4109.86427 | -4110.37801 |
| 17.76    | -4106.24759 | -4106.65326 | -4108.31483 | -4108.78211 | -4108.61414 | -4109.08510 | -4108.99496 | -4109.45408 | -4109.86427 | -4110.37801 |
| 17.86    | -4106.24759 | -4106.65325 | -4108.31483 | -4108.78211 | -4108.61414 | -4109.08510 | -4108.99496 | -4109.45409 | -4109.86427 | -4110.37801 |
| 17.95    | -4106.24759 | -4106.65325 | -4108.31483 | -4108.78211 | -4108.61414 | -4109.08510 | -4108.99496 | -4109.45409 | -4109.86427 | -4110.37801 |
| 18.05    | -4106.24759 | -4106.65325 | -4108.31483 | -4108.78211 | -4108.61414 | -4109.08510 | -4108.99496 | -4109.45409 | -4109.86427 | -4110.37801 |

Table S15: The absolute energies in hartree of the potential energy curve of NbSi in the  $^2\Delta$  state with a CASSCF wave function and nom-CPO active space.

| Distance | CASSCF      | CASPT2      | tpbe        | ftpbe       | trevpbe     | ftrevpbe    | tblyp       | ftblyp      | torelyp     | ftorelyp    |
|----------|-------------|-------------|-------------|-------------|-------------|-------------|-------------|-------------|-------------|-------------|
| 1.98     | -4102.92306 | -4103.38518 | -4105.09591 | -4105.57091 | -4105.37828 | -4105.85467 | -4105.72527 | -4106.20429 | -4106.67886 | -4107.19991 |
| 2.08     | -4103.57585 | -4104.03820 | -4105.74073 | -4106.21532 | -4106.02412 | -4106.50011 | -4106.37270 | -4106.85073 | -4107.31951 | -4107.84014 |
| 2.17     | -4104.08849 | -4104.56087 | -4106.25625 | -4106.73044 | -4106.54067 | -4107.01625 | -4106.89044 | -4107.36768 | -4107.83127 | -4108.35144 |
| 2.27     | -4104.50978 | -4104.97732 | -4106.66670 | -4107.14050 | -4106.95210 | -4107.42730 | -4107.30290 | -4107.77935 | -4108.23836 | -4108.75802 |
| 2.36     | -4104.84989 | -4105.30829 | -4106.99274 | -4107.46619 | -4107.27908 | -4107.75391 | -4107.63081 | -4108.10646 | -4108.56148 | -4109.08058 |
| 2.46     | -4105.12878 | -4105.57121 | -4107.25200 | -4107.72504 | -4107.53922 | -4108.01365 | -4107.89146 | -4108.36661 | -4108.81823 | -4109.33675 |
| 2.55     | -4105.36566 | -4105.78030 | -4107.45868 | -4107.93129 | -4107.74671 | -4108.22072 | -4108.09903 | -4108.57407 | -4109.02277 | -4109.54074 |
| 2.65     | -4105.55183 | -4105.95160 | -4107.62405 | -4108.09625 | -4107.91282 | -4108.38644 | -4108.27067 | -4108.74014 | -4109.18632 | -4109.70378 |
| 2.74     | -4105.70265 | -4106.08652 | -4107.75711 | -4108.22892 | -4108.04654 | -4108.51979 | -4108.40476 | -4108.87381 | -4109.31779 | -4109.83480 |
| 2.83     | -4105.82557 | -4106.19575 | -4107.86480 | -4108.33627 | -4108.15483 | -4108.62777 | -4108.51340 | -4108.98205 | -4109.42408 | -4109.94071 |
| 2.93     | -4105.92619 | -4106.28470 | -4107.95248 | -4108.42364 | -4108.24304 | -4108.71571 | -4108.60195 | -4109.07023 | -4109.51049 | -4110.02682 |
| 3.02     | -4106.00857 | -4106.35746 | -4108.02418 | -4108.49507 | -4108.31521 | -4108.78766 | -4108.67446 | -4109.14238 | -4109.58101 | -4110.09712 |
| 3.12     | -4106.07588 | -4106.52435 | -4108.08299 | -4108.55365 | -4108.37446 | -4108.84673 | -4108.83550 | -4109.20163 | -4109.63875 | -4110.15468 |
| 3.21     | -4106.13069 | -4106.57866 | -4108.24005 | -4108.71064 | -4108.53238 | -4109.00410 | -4108.89016 | -4109.35768 | -4109.79675 | -4110.31219 |
| 3.31     | -4106.17511 | -4106.62322 | -4108.28463 | -4108.75495 | -4108.57753 | -4109.04908 | -4108.93511 | -4109.40208 | -4109.84067 | -4110.35589 |
| 3.40     | -4106.21095 | -4106.65968 | -4108.32117 | -4108.79107 | -4108.61462 | -4109.08581 | -4108.97204 | -4109.43836 | -4109.87668 | -4110.39150 |
| 3.50     | -4106.23977 | -4106.68932 | -4108.35105 | -4108.82029 | -4108.64502 | -4109.11558 | -4109.00236 | -4109.46790 | -4109.90623 | -4110.42031 |
| 3.59     | -4106.26299 | -4106.71257 | -4108.37529 | -4108.84337 | -4108.66974 | -4109.13907 | -4109.02724 | -4109.49164 | -4109.93052 | -4110.44313 |
| 3.68     | -4106.28184 | -4106.73017 | -4108.39476 | -4108.86172 | -4108.68964 | -4109.15784 | -4109.04748 | -4109.51063 | -4109.95030 | -4110.46147 |
| 3.78     | -4106.29826 | -4106.74235 | -4108.41130 | -4108.87772 | -4108.70679 | -4109.17471 | -4109.06503 | -4109.52779 | -4109.96609 | -4110.47675 |
| 3.87     | -4106.31068 | -4106.75335 | -4108.42236 | -4108.88887 | -4108.71809 | -4109.18616 | -4109.07684 | -4109.53958 | -4109.97628 | -4110.48712 |
| 3.97     | -4106.32004 | -4106.76157 | -4108.43058 | -4108.89713 | -4108.72645 | -4109.19465 | -4109.08582 | -4109.54850 | -4109.98358 | -4110.49457 |
| 4.06     | -4106.32681 | -4106.76740 | -4108.43639 | -4108.90295 | -4108.73236 | -4109.20063 | -4109.09243 | -4109.55497 | -4109.98845 | -4110.49952 |
| 4.16     | -4106.33139 | -4106.77117 | -4108.44014 | -4108.90668 | -4108.73617 | -4109.20450 | -4109.09699 | -4109.55936 | -4109.99125 | -4110.50237 |
| 4.35     | -4106.33541 | -4106.77318 | -4108.44213 | -4108.90864 | -4108.73819 | -4109.20658 | -4109.09979 | -4109.56196 | -4109.99227 | -4110.50343 |
| 4.44     | -4106.33546 | -4106.77372 | -4108.44265 | -4108.90913 | -4108.73870 | -4109.20718 | -4109.10110 | -4109.56306 | -4109.99179 | -4110.50299 |
| 4.54     | -4106.33455 | -4106.77305 | -4108.44192 | -4108.90840 | -4108.73795 | -4109.20656 | -4109.10116 | -4109.56290 | -4109.99003 | -4110.50132 |
| 4.63     | -4106.33291 | -4106.77139 | -4108.44016 | -4108.90669 | -4108.73615 | -4109.20497 | -4109.10017 | -4109.56170 | -4109.98723 | -4110.49866 |
| 4.72     | -4106.33073 | -4106.76892 | -4108.43757 | -4108.90419 | -4108.73349 | -4109.20261 | -4109.09829 | -4109.55965 | -4109.98357 | -4110.49524 |
| 4.82     | -4106.32817 | -4106.76582 | -4108.43427 | -4108.90105 | -4108.73012 | -4109.19963 | -4109.09567 | -4109.55688 | -4109.97923 | -4110.49121 |
| 4.91     | -4106.32536 | -4106.76222 | -4108.43039 | -4108.89740 | -4108.72618 | -4109.19616 | -4109.09241 | -4109.55351 | -4109.97433 | -4110.48674 |
| 5.01     | -4106.32244 | -4106.75824 | -4108.42599 | -4108.89327 | -4108.72172 | -4109.19226 | -4109.08856 | -4109.54959 | -4109.96896 | -4110.48189 |
| 5.10     | -4106.31950 | -4106.75394 | -4108.42105 | -4108.88866 | -4108.71673 | -4109.18791 | -4109.08410 | -4109.54509 | -4109.96307 | -4110.47665 |
| 5.20     | -4106.31661 | -4106.74934 | -4108.41563 | -4108.88358 | -4108.71127 | -4109.18312 | -4109.07910 | -4109.54006 | -4109.95676 | -4110.47106 |
| 5.29     | -4106.31378 | -4106.74457 | -4108.41006 | -4108.87828 | -4108.70569 | -4109.17811 | -4109.07388 | -4109.53476 | -4109.95042 | -4110.46535 |
| 5.39     | -4106.31101 | -4106.73977 | -4108.40459 | -4108.87299 | -4108.70024 | -4109.17309 | -4109.06874 | -4109.52949 | -4109.94434 | -4110.45976 |



Table S15: The absolute energies in hartree of the potential energy curve of NbSi in the  $^2\Delta$  state with a CASSCF wave function and nom-CPO active space.

| Distance | CASSCF      | CASPT2      | tpbe        | ftpb        | trevpb      | ftrevpb     | tblyp       | ftblyp      | torelyp     | ftorelyp    |
|----------|-------------|-------------|-------------|-------------|-------------|-------------|-------------|-------------|-------------|-------------|
| 5.48     | -4106.30826 | -4106.73506 | -4108.39937 | -4108.86787 | -4108.69506 | -4109.16821 | -4109.06382 | -4109.52440 | -4109.93865 | -4110.45441 |
| 5.57     | -4106.30554 | -4106.73050 | -4108.39444 | -4108.86300 | -4108.69019 | -4109.16356 | -4109.05919 | -4109.51960 | -4109.93338 | -4110.44939 |
| 5.67     | -4106.30282 | -4106.72611 | -4108.38981 | -4108.85840 | -4108.68563 | -4109.15915 | -4109.05486 | -4109.51510 | -4109.92852 | -4110.44470 |
| 5.76     | -4106.30012 | -4106.72186 | -4108.38543 | -4108.85403 | -4108.68134 | -4109.15496 | -4109.05078 | -4109.51085 | -4109.92401 | -4110.44030 |
| 5.86     | -4106.29743 | -4106.71774 | -4108.38128 | -4108.84986 | -4108.67727 | -4109.15096 | -4109.04693 | -4109.50683 | -4109.91979 | -4110.43615 |
| 5.95     | -4106.29477 | -4106.71376 | -4108.37732 | -4108.84588 | -4108.67341 | -4109.14713 | -4109.04328 | -4109.50303 | -4109.91581 | -4110.43223 |
| 6.05     | -4106.29215 | -4106.70990 | -4108.37355 | -4108.84207 | -4108.66973 | -4109.14345 | -4109.03982 | -4109.49940 | -4109.91207 | -4110.42851 |
| 6.14     | -4106.28956 | -4106.70618 | -4108.36994 | -4108.83841 | -4108.66621 | -4109.13991 | -4109.03653 | -4109.49595 | -4109.90853 | -4110.42497 |
| 6.24     | -4106.28703 | -4106.70259 | -4108.36650 | -4108.83491 | -4108.66286 | -4109.13652 | -4109.03341 | -4109.49268 | -4109.90518 | -4110.42162 |
| 6.33     | -4106.28455 | -4106.69914 | -4108.36322 | -4108.83156 | -4108.65967 | -4109.13327 | -4109.03047 | -4109.48959 | -4109.90203 | -4110.41844 |
| 6.43     | -4106.28215 | -4106.69584 | -4108.36009 | -4108.82835 | -4108.65663 | -4109.13015 | -4109.02769 | -4109.48665 | -4109.89905 | -4110.41542 |
| 6.52     | -4106.27982 | -4106.69268 | -4108.35712 | -4108.82530 | -4108.65373 | -4109.12717 | -4109.02507 | -4109.48389 | -4109.89625 | -4110.41257 |
| 6.61     | -4106.27757 | -4106.68967 | -4108.35429 | -4108.82239 | -4108.65098 | -4109.12432 | -4109.02261 | -4109.48130 | -4109.89361 | -4110.40988 |
| 6.71     | -4106.27541 | -4106.68682 | -4108.35161 | -4108.81962 | -4108.64838 | -4109.12160 | -4109.02031 | -4109.47888 | -4109.89115 | -4110.40734 |
| 6.80     | -4106.27335 | -4106.68412 | -4108.34907 | -4108.81701 | -4108.64591 | -4109.11902 | -4109.01817 | -4109.47663 | -4109.88885 | -4110.40498 |
| 6.90     | -4106.27140 | -4106.68158 | -4108.34667 | -4108.81455 | -4108.64359 | -4109.11658 | -4109.01620 | -4109.47457 | -4109.88671 | -4110.40278 |
| 6.99     | -4106.26955 | -4106.67920 | -4108.34441 | -4108.81222 | -4108.64139 | -4109.11427 | -4109.01437 | -4109.47268 | -4109.88472 | -4110.40073 |
| 7.09     | -4106.26782 | -4106.67698 | -4108.34226 | -4108.81002 | -4108.63931 | -4109.11207 | -4109.01268 | -4109.47096 | -4109.88288 | -4110.39882 |
| 7.18     | -4106.26620 | -4106.67492 | -4108.34022 | -4108.80794 | -4108.63734 | -4109.10999 | -4109.01112 | -4109.46939 | -4109.88117 | -4110.39705 |
| 7.28     | -4106.26471 | -4106.67303 | -4108.33829 | -4108.80599 | -4108.63547 | -4109.10803 | -4109.00968 | -4109.46796 | -4109.87959 | -4110.39540 |
| 7.37     | -4106.26333 | -4106.67129 | -4108.33646 | -4108.80414 | -4108.63371 | -4109.10616 | -4109.00835 | -4109.46667 | -4109.87811 | -4110.39387 |
| 7.46     | -4106.26207 | -4106.66970 | -4108.33472 | -4108.80238 | -4108.63202 | -4109.10438 | -4109.00710 | -4109.46548 | -4109.87673 | -4110.39243 |
| 7.56     | -4106.26092 | -4106.66825 | -4108.33305 | -4108.80070 | -4108.63042 | -4109.10269 | -4109.00593 | -4109.46437 | -4109.87543 | -4110.39108 |
| 7.65     | -4106.25988 | -4106.66693 | -4108.33145 | -4108.79910 | -4108.62889 | -4109.10108 | -4109.00481 | -4109.46335 | -4109.87422 | -4110.38980 |
| 7.75     | -4106.25893 | -4106.66573 | -4108.32993 | -4108.79758 | -4108.62743 | -4109.09955 | -4109.00376 | -4109.46239 | -4109.87307 | -4110.38859 |
| 7.84     | -4106.25808 | -4106.66464 | -4108.32848 | -4108.79614 | -4108.62605 | -4109.09809 | -4109.00275 | -4109.46149 | -4109.87200 | -4110.38745 |
| 7.94     | -4106.25732 | -4106.66365 | -4108.32710 | -4108.79476 | -4108.62475 | -4109.09672 | -4109.00180 | -4109.46063 | -4109.87099 | -4110.38637 |
| 8.03     | -4106.25663 | -4106.66275 | -4108.32581 | -4108.79347 | -4108.62351 | -4109.09543 | -4109.00088 | -4109.45982 | -4109.87005 | -4110.38537 |
| 8.13     | -4106.25601 | -4106.66193 | -4108.32458 | -4108.79225 | -4108.62236 | -4109.09422 | -4109.00002 | -4109.45906 | -4109.86918 | -4110.38443 |
| 8.22     | -4106.25546 | -4106.66118 | -4108.32343 | -4108.79111 | -4108.62128 | -4109.09309 | -4108.99920 | -4109.45835 | -4109.86837 | -4110.38356 |
| 8.31     | -4106.25497 | -4106.66050 | -4108.32235 | -4108.79004 | -4108.62027 | -4109.09204 | -4108.99842 | -4109.45767 | -4109.86762 | -4110.38275 |
| 8.41     | -4106.25453 | -4106.65989 | -4108.32135 | -4108.78904 | -4108.61934 | -4109.09107 | -4108.99769 | -4109.45703 | -4109.86694 | -4110.38202 |
| 8.50     | -4106.25414 | -4106.65934 | -4108.32042 | -4108.78812 | -4108.61848 | -4109.09018 | -4108.99700 | -4109.45644 | -4109.86633 | -4110.38136 |
| 8.60     | -4106.25379 | -4106.65885 | -4108.31957 | -4108.78729 | -4108.61771 | -4109.08938 | -4108.99637 | -4109.45590 | -4109.86580 | -4110.38078 |
| 8.69     | -4106.25348 | -4106.65842 | -4108.31883 | -4108.78655 | -4108.61704 | -4109.08868 | -4108.99582 | -4109.45543 | -4109.86534 | -4110.38028 |
| 8.79     | -4106.25321 | -4106.65804 | -4108.31818 | -4108.78590 | -4108.61646 | -4109.08807 | -4108.99534 | -4109.45502 | -4109.86495 | -4110.37985 |
| 8.88     | -4106.25297 | -4106.65770 | -4108.31761 | -4108.78533 | -4108.61596 | -4109.08754 | -4108.99493 | -4109.45466 | -4109.86462 | -4110.37948 |
| 8.98     | -4106.25275 | -4106.65739 | -4108.31711 | -4108.78482 | -4108.61552 | -4109.08708 | -4108.99457 | -4109.45434 | -4109.86434 | -4110.37916 |
| 9.07     | -4106.25255 | -4106.65711 | -4108.31667 | -4108.78438 | -4108.61514 | -4109.08667 | -4108.99426 | -4109.45406 | -4109.86411 | -4110.37888 |
| 9.17     | -4106.25237 | -4106.65685 | -4108.31628 | -4108.78398 | -4108.61481 | -4109.08632 | -4108.99399 | -4109.45381 | -4109.86391 | -4110.37865 |
| 9.26     | -4106.25221 | -4106.65661 | -4108.31593 | -4108.78363 | -4108.61452 | -4109.08601 | -4108.99376 | -4109.45360 | -4109.86375 | -4110.37845 |
| 9.35     | -4106.25207 | -4106.65639 | -4108.31563 | -4108.78332 | -4108.61426 | -4109.08573 | -4108.99356 | -4109.45340 | -4109.86361 | -4110.37827 |
| 9.45     | -4106.25194 | -4106.65619 | -4108.31536 | -4108.78304 | -4108.61405 | -4109.08549 | -4108.99338 | -4109.45324 | -4109.86349 | -4110.37813 |
| 9.54     | -4106.25182 | -4106.65600 | -4108.31512 | -4108.78279 | -4108.61385 | -4109.08528 | -4108.99323 | -4109.45309 | -4109.86340 | -4110.37800 |
| 9.64     | -4106.25171 | -4106.65583 | -4108.31490 | -4108.78257 | -4108.61368 | -4109.08510 | -4108.99310 | -4109.45296 | -4109.86332 | -4110.37790 |
| 9.73     | -4106.25162 | -4106.65567 | -4108.31471 | -4108.78237 | -4108.61354 | -4109.08493 | -4108.99298 | -4109.45285 | -4109.86326 | -4110.37781 |
| 9.83     | -4106.25153 | -4106.65552 | -4108.31454 | -4108.78219 | -4108.61341 | -4109.08479 | -4108.99288 | -4109.45275 | -4109.86321 | -4110.37773 |
| 9.92     | -4106.25145 | -4106.65537 | -4108.31438 | -4108.78202 | -4108.61329 | -4109.08465 | -4108.99278 | -4109.45265 | -4109.86316 | -4110.37766 |
| 10.02    | -4106.25137 | -4106.65524 | -4108.31425 | -4108.78188 | -4108.61319 | -4109.08455 | -4108.99271 | -4109.45257 | -4109.86314 | -4110.37761 |
| 10.11    | -4106.25130 | -4106.65511 | -4108.31412 | -4108.78175 | -4108.61310 | -4109.08444 | -4108.99264 | -4109.45250 | -4109.86311 | -4110.37756 |
| 10.20    | -4106.25124 | -4106.65500 | -4108.31402 | -4108.78164 | -4108.61304 | -4109.08436 | -4108.99259 | -4109.45245 | -4109.86310 | -4110.37753 |
| 10.30    | -4106.25119 | -4106.65489 | -4108.31391 | -4108.78152 | -4108.61296 | -4109.08428 | -4108.99253 | -4109.45239 | -4109.86308 | -4110.37749 |

Table S15: The absolute energies in hartree of the potential energy curve of NbSi in the  $^2\Delta$  state with a CASSCF wave function and nom-CPO active space.

| Distance | CASSCF      | CASPT2      | tpbe        | ftpb        | trevpbe     | ftrevpbe    | tblyp       | ftblyp      | torelyp     | ftorelyp    |
|----------|-------------|-------------|-------------|-------------|-------------|-------------|-------------|-------------|-------------|-------------|
| 10.39    | -4106.25113 | -4106.65479 | -4108.31384 | -4108.78144 | -4108.61292 | -4109.08422 | -4108.99251 | -4109.45236 | -4109.86309 | -4110.37748 |
| 10.49    | -4106.25108 | -4106.65469 | -4108.31375 | -4108.78134 | -4108.61286 | -4109.08415 | -4108.99246 | -4109.45231 | -4109.86308 | -4110.37745 |
| 10.58    | -4106.25104 | -4106.65460 | -4108.31368 | -4108.78127 | -4108.61282 | -4109.08409 | -4108.99243 | -4109.45228 | -4109.86308 | -4110.37744 |
| 10.68    | -4106.25100 | -4106.65452 | -4108.31361 | -4108.78120 | -4108.61278 | -4109.08405 | -4108.99241 | -4109.45225 | -4109.86308 | -4110.37743 |
| 10.77    | -4106.25096 | -4106.65443 | -4108.31355 | -4108.78113 | -4108.61274 | -4109.08400 | -4108.99239 | -4109.45222 | -4109.86308 | -4110.37742 |
| 10.87    | -4106.25093 | -4106.65436 | -4108.31350 | -4108.78107 | -4108.61271 | -4109.08397 | -4108.99237 | -4109.45220 | -4109.86309 | -4110.37741 |
| 10.96    | -4106.25089 | -4106.65429 | -4108.31345 | -4108.78102 | -4108.61269 | -4109.08393 | -4108.99236 | -4109.45218 | -4109.86310 | -4110.37740 |
| 11.05    | -4106.25086 | -4106.65422 | -4108.31341 | -4108.78097 | -4108.61267 | -4109.08390 | -4108.99235 | -4109.45216 | -4109.86311 | -4110.37740 |
| 11.15    | -4106.25084 | -4106.65416 | -4108.31337 | -4108.78093 | -4108.61265 | -4109.08388 | -4108.99234 | -4109.45215 | -4109.86312 | -4110.37740 |
| 11.24    | -4106.25081 | -4106.65410 | -4108.31334 | -4108.78089 | -4108.61264 | -4109.08386 | -4108.99234 | -4109.45215 | -4109.86313 | -4110.37739 |
| 11.34    | -4106.25079 | -4106.65404 | -4108.31331 | -4108.78085 | -4108.61262 | -4109.08383 | -4108.99233 | -4109.45214 | -4109.86314 | -4110.37739 |
| 11.43    | -4106.25076 | -4106.65399 | -4108.31328 | -4108.78082 | -4108.61261 | -4109.08382 | -4108.99234 | -4109.45214 | -4109.86315 | -4110.37739 |
| 11.53    | -4106.25074 | -4106.65394 | -4108.31325 | -4108.78079 | -4108.61260 | -4109.08380 | -4108.99234 | -4109.45213 | -4109.86316 | -4110.37740 |
| 11.62    | -4106.25072 | -4106.65389 | -4108.31324 | -4108.78077 | -4108.61260 | -4109.08379 | -4108.99234 | -4109.45213 | -4109.86317 | -4110.37740 |
| 11.72    | -4106.25071 | -4106.65385 | -4108.31321 | -4108.78075 | -4108.61259 | -4109.08378 | -4108.99234 | -4109.45213 | -4109.86318 | -4110.37740 |
| 11.81    | -4106.25069 | -4106.65381 | -4108.31319 | -4108.78072 | -4108.61258 | -4109.08376 | -4108.99234 | -4109.45213 | -4109.86319 | -4110.37740 |
| 11.91    | -4106.25067 | -4106.65376 | -4108.31317 | -4108.78070 | -4108.61257 | -4109.08375 | -4108.99235 | -4109.45213 | -4109.86319 | -4110.37739 |
| 12.00    | -4106.25066 | -4106.65373 | -4108.31316 | -4108.78068 | -4108.61257 | -4109.08374 | -4108.99235 | -4109.45214 | -4109.86320 | -4110.37740 |
| 12.09    | -4106.25065 | -4106.65369 | -4108.31314 | -4108.78066 | -4108.61256 | -4109.08373 | -4108.99236 | -4109.45214 | -4109.86321 | -4110.37740 |
| 12.19    | -4106.25063 | -4106.65365 | -4108.31313 | -4108.78065 | -4108.61256 | -4109.08372 | -4108.99236 | -4109.45214 | -4109.86321 | -4110.37739 |
| 12.28    | -4106.25062 | -4106.65362 | -4108.31311 | -4108.78063 | -4108.61255 | -4109.08371 | -4108.99237 | -4109.45214 | -4109.86322 | -4110.37739 |
| 12.38    | -4106.25061 | -4106.65358 | -4108.31310 | -4108.78061 | -4108.61255 | -4109.08371 | -4108.99238 | -4109.45215 | -4109.86322 | -4110.37739 |
| 12.47    | -4106.25060 | -4106.65355 | -4108.31309 | -4108.78060 | -4108.61255 | -4109.08370 | -4108.99238 | -4109.45215 | -4109.86323 | -4110.37739 |
| 12.57    | -4106.25059 | -4106.65352 | -4108.31308 | -4108.78059 | -4108.61254 | -4109.08369 | -4108.99239 | -4109.45216 | -4109.86323 | -4110.37739 |
| 12.66    | -4106.25058 | -4106.65349 | -4108.31307 | -4108.78058 | -4108.61254 | -4109.08369 | -4108.99239 | -4109.45216 | -4109.86323 | -4110.37739 |
| 12.76    | -4106.25057 | -4106.65346 | -4108.31306 | -4108.78057 | -4108.61254 | -4109.08368 | -4108.99240 | -4109.45217 | -4109.86324 | -4110.37739 |
| 12.85    | -4106.25056 | -4106.65344 | -4108.31305 | -4108.78056 | -4108.61253 | -4109.08367 | -4108.99240 | -4109.45217 | -4109.86324 | -4110.37739 |
| 12.94    | -4106.25055 | -4106.65342 | -4108.31304 | -4108.78055 | -4108.61253 | -4109.08367 | -4108.99241 | -4109.45218 | -4109.86325 | -4110.37739 |
| 13.04    | -4106.25054 | -4106.65340 | -4108.31304 | -4108.78055 | -4108.61253 | -4109.08367 | -4108.99242 | -4109.45219 | -4109.86325 | -4110.37739 |
| 13.13    | -4106.25054 | -4106.65338 | -4108.31303 | -4108.78054 | -4108.61253 | -4109.08367 | -4108.99243 | -4109.45219 | -4109.86325 | -4110.37739 |
| 13.23    | -4106.25053 | -4106.65335 | -4108.31302 | -4108.78053 | -4108.61252 | -4109.08366 | -4108.99243 | -4109.45219 | -4109.86325 | -4110.37738 |
| 13.32    | -4106.25052 | -4106.65333 | -4108.31302 | -4108.78052 | -4108.61252 | -4109.08365 | -4108.99244 | -4109.45220 | -4109.86325 | -4110.37738 |
| 13.42    | -4106.25052 | -4106.65331 | -4108.31301 | -4108.78051 | -4108.61252 | -4109.08365 | -4108.99244 | -4109.45220 | -4109.86325 | -4110.37738 |
| 13.51    | -4106.25051 | -4106.65329 | -4108.31301 | -4108.78051 | -4108.61252 | -4109.08365 | -4108.99245 | -4109.45221 | -4109.86325 | -4110.37738 |
| 13.61    | -4106.25051 | -4106.65327 | -4108.31300 | -4108.78050 | -4108.61252 | -4109.08364 | -4108.99246 | -4109.45222 | -4109.86325 | -4110.37738 |
| 13.70    | -4106.25050 | -4106.65325 | -4108.31300 | -4108.78050 | -4108.61251 | -4109.08364 | -4108.99246 | -4109.45222 | -4109.86325 | -4110.37737 |
| 13.80    | -4106.25050 | -4106.65323 | -4108.31299 | -4108.78049 | -4108.61251 | -4109.08363 | -4108.99246 | -4109.45222 | -4109.86325 | -4110.37737 |
| 13.89    | -4106.25049 | -4106.65322 | -4108.31299 | -4108.78049 | -4108.61251 | -4109.08363 | -4108.99247 | -4109.45223 | -4109.86325 | -4110.37737 |
| 13.98    | -4106.25049 | -4106.65276 | -4108.31298 | -4108.78048 | -4108.61251 | -4109.08363 | -4108.99247 | -4109.45223 | -4109.86325 | -4110.37737 |
| 14.08    | -4106.25048 | -4106.65274 | -4108.31298 | -4108.78048 | -4108.61251 | -4109.08363 | -4108.99248 | -4109.45223 | -4109.86325 | -4110.37737 |
| 14.17    | -4106.25048 | -4106.65273 | -4108.31298 | -4108.78048 | -4108.61250 | -4109.08363 | -4108.99248 | -4109.45224 | -4109.86325 | -4110.37737 |
| 14.27    | -4106.25047 | -4106.65271 | -4108.31298 | -4108.78047 | -4108.61250 | -4109.08363 | -4108.99249 | -4109.45224 | -4109.86325 | -4110.37736 |
| 14.36    | -4106.25047 | -4106.65270 | -4108.31297 | -4108.78047 | -4108.61250 | -4109.08362 | -4108.99249 | -4109.45225 | -4109.86325 | -4110.37736 |
| 14.46    | -4106.25047 | -4106.65268 | -4108.31297 | -4108.78047 | -4108.61250 | -4109.08362 | -4108.99250 | -4109.45225 | -4109.86325 | -4110.37736 |
| 14.55    | -4106.25046 | -4106.65267 | -4108.31297 | -4108.78046 | -4108.61250 | -4109.08362 | -4108.99250 | -4109.45225 | -4109.86325 | -4110.37736 |
| 14.65    | -4106.25046 | -4106.65265 | -4108.31296 | -4108.78046 | -4108.61250 | -4109.08362 | -4108.99250 | -4109.45226 | -4109.86325 | -4110.37736 |
| 14.74    | -4106.25046 | -4106.65264 | -4108.31296 | -4108.78046 | -4108.61250 | -4109.08361 | -4108.99251 | -4109.45226 | -4109.86325 | -4110.37736 |
| 14.83    | -4106.25045 | -4106.65263 | -4108.31296 | -4108.78046 | -4108.61250 | -4109.08361 | -4108.99251 | -4109.45226 | -4109.86325 | -4110.37736 |
| 14.93    | -4106.25045 | -4106.65261 | -4108.31296 | -4108.78046 | -4108.61250 | -4109.08361 | -4108.99251 | -4109.45227 | -4109.86325 | -4110.37736 |
| 15.02    | -4106.25045 | -4106.65260 | -4108.31296 | -4108.78045 | -4108.61250 | -4109.08361 | -4108.99252 | -4109.45227 | -4109.86325 | -4110.37736 |
| 15.12    | -4106.25044 | -4106.65258 | -4108.31296 | -4108.78045 | -4108.61249 | -4109.08361 | -4108.99252 | -4109.45227 | -4109.86325 | -4110.37736 |
| 15.21    | -4106.25044 | -4106.65257 | -4108.31296 | -4108.78045 | -4108.61249 | -4109.08361 | -4108.99252 | -4109.45228 | -4109.86325 | -4110.37735 |

Table S15: The absolute energies in hartree of the potential energy curve of NbSi in the  $^2\Delta$  state with a CASSCF wave function and nom-CPO active space.

| Distance | CASSCF      | CASPT2      | tpbe        | ftpbe       | trevpbe     | ftrevpbe    | tblyp       | ftblyp      | torelyp     | ftorelyp    |
|----------|-------------|-------------|-------------|-------------|-------------|-------------|-------------|-------------|-------------|-------------|
| 15.31    | -4106.25044 | -4106.65255 | -4108.31296 | -4108.78045 | -4108.61249 | -4109.08361 | -4108.99253 | -4109.45228 | -4109.86325 | -4110.37735 |
| 15.40    | -4106.25044 | -4106.65254 | -4108.31295 | -4108.78045 | -4108.61249 | -4109.08361 | -4108.99253 | -4109.45228 | -4109.86325 | -4110.37735 |
| 15.50    | -4106.25044 | -4106.65252 | -4108.31295 | -4108.78045 | -4108.61249 | -4109.08361 | -4108.99253 | -4109.45228 | -4109.86325 | -4110.37735 |
| 15.59    | -4106.25043 | -4106.65250 | -4108.31295 | -4108.78045 | -4108.61249 | -4109.08361 | -4108.99253 | -4109.45229 | -4109.86325 | -4110.37735 |
| 15.68    | -4106.25043 | -4106.65248 | -4108.31295 | -4108.78045 | -4108.61249 | -4109.08360 | -4108.99254 | -4109.45229 | -4109.86325 | -4110.37735 |
| 15.78    | -4106.25043 | -4106.65246 | -4108.31295 | -4108.78044 | -4108.61249 | -4109.08360 | -4108.99254 | -4109.45229 | -4109.86325 | -4110.37735 |
| 15.87    | -4106.25043 | -4106.65244 | -4108.31295 | -4108.78044 | -4108.61249 | -4109.08360 | -4108.99254 | -4109.45229 | -4109.86325 | -4110.37735 |
| 15.97    | -4106.25042 | -4106.65242 | -4108.31295 | -4108.78044 | -4108.61248 | -4109.08360 | -4108.99254 | -4109.45230 | -4109.86325 | -4110.37735 |
| 16.06    | -4106.25042 | -4106.65240 | -4108.31295 | -4108.78044 | -4108.61248 | -4109.08360 | -4108.99254 | -4109.45230 | -4109.86325 | -4110.37735 |
| 16.16    | -4106.25042 | -4106.65239 | -4108.31295 | -4108.78044 | -4108.61248 | -4109.08360 | -4108.99255 | -4109.45230 | -4109.86325 | -4110.37735 |
| 16.25    | -4106.25042 | -4106.65238 | -4108.31295 | -4108.78044 | -4108.61248 | -4109.08360 | -4108.99255 | -4109.45230 | -4109.86325 | -4110.37734 |
| 16.35    | -4106.25042 | -4106.65238 | -4108.31295 | -4108.78044 | -4108.61248 | -4109.08360 | -4108.99255 | -4109.45230 | -4109.86325 | -4110.37734 |
| 16.44    | -4106.25042 | -4106.65237 | -4108.31295 | -4108.78044 | -4108.61248 | -4109.08360 | -4108.99255 | -4109.45231 | -4109.86325 | -4110.37734 |
| 16.54    | -4106.25042 | -4106.65237 | -4108.31294 | -4108.78044 | -4108.61248 | -4109.08360 | -4108.99255 | -4109.45231 | -4109.86324 | -4110.37734 |
| 16.63    | -4106.25041 | -4106.65237 | -4108.31294 | -4108.78044 | -4108.61248 | -4109.08360 | -4108.99256 | -4109.45231 | -4109.86324 | -4110.37734 |
| 16.72    | -4106.25041 | -4106.65237 | -4108.31294 | -4108.78044 | -4108.61248 | -4109.08360 | -4108.99256 | -4109.45231 | -4109.86324 | -4110.37734 |
| 16.82    | -4106.25041 | -4106.65236 | -4108.31294 | -4108.78044 | -4108.61248 | -4109.08360 | -4108.99256 | -4109.45231 | -4109.86324 | -4110.37734 |
| 16.91    | -4106.25041 | -4106.65235 | -4108.31294 | -4108.78044 | -4108.61248 | -4109.08359 | -4108.99256 | -4109.45231 | -4109.86324 | -4110.37734 |
| 17.01    | -4106.25041 | -4106.65234 | -4108.31294 | -4108.78043 | -4108.61248 | -4109.08359 | -4108.99256 | -4109.45231 | -4109.86324 | -4110.37734 |
| 17.10    | -4106.25041 | -4106.65234 | -4108.31294 | -4108.78043 | -4108.61248 | -4109.08359 | -4108.99256 | -4109.45231 | -4109.86324 | -4110.37734 |
| 17.20    | -4106.25041 | -4106.65234 | -4108.31294 | -4108.78043 | -4108.61248 | -4109.08359 | -4108.99256 | -4109.45231 | -4109.86324 | -4110.37734 |
| 17.29    | -4106.25041 | -4106.65231 | -4108.31294 | -4108.78043 | -4108.61248 | -4109.08359 | -4108.99256 | -4109.45231 | -4109.86324 | -4110.37734 |
| 17.39    | -4106.25040 | -4106.65230 | -4108.31294 | -4108.78043 | -4108.61248 | -4109.08359 | -4108.99256 | -4109.45232 | -4109.86324 | -4110.37734 |
| 17.48    | -4106.25040 | -4106.65229 | -4108.31294 | -4108.78043 | -4108.61248 | -4109.08359 | -4108.99256 | -4109.45232 | -4109.86324 | -4110.37734 |
| 17.57    | -4106.25040 | -4106.65228 | -4108.31294 | -4108.78043 | -4108.61248 | -4109.08359 | -4108.99257 | -4109.45232 | -4109.86324 | -4110.37734 |
| 17.67    | -4106.25040 | -4106.65228 | -4108.31294 | -4108.78043 | -4108.61248 | -4109.08359 | -4108.99257 | -4109.45232 | -4109.86324 | -4110.37734 |
| 17.76    | -4106.25040 | -4106.65228 | -4108.31294 | -4108.78043 | -4108.61248 | -4109.08359 | -4108.99257 | -4109.45232 | -4109.86324 | -4110.37734 |
| 17.86    | -4106.25040 | -4106.65228 | -4108.31294 | -4108.78043 | -4108.61248 | -4109.08359 | -4108.99257 | -4109.45232 | -4109.86324 | -4110.37734 |
| 17.95    | -4106.25040 | -4106.65228 | -4108.31294 | -4108.78043 | -4108.61248 | -4109.08359 | -4108.99257 | -4109.45232 | -4109.86324 | -4110.37734 |
| 18.05    | -4106.25040 | -4106.65228 | -4108.31294 | -4108.78044 | -4108.61248 | -4109.08359 | -4108.99257 | -4109.45233 | -4109.86325 | -4110.37734 |

Table S16: The absolute energies in hartree of the potential energy curve of NbSi in the  $^4\Pi$  state with a SP-based wave function and nom-CPO active space.

| Distance | SP          | tpbe        | ftpbe       | trevpbe     | ftrevpbe    | tblyp       | ftblyp      | torelyp     | ftorelyp    |
|----------|-------------|-------------|-------------|-------------|-------------|-------------|-------------|-------------|-------------|
| 1.98     | -4101.97596 | -4104.18838 | -4104.65830 | -4104.46747 | -4104.93924 | -4104.82742 | -4105.29378 | -4105.76675 | -4106.28192 |
| 2.08     | -4102.78409 | -4104.98985 | -4105.45953 | -4105.27014 | -4105.74163 | -4105.63072 | -4106.09677 | -4106.56450 | -4107.07937 |
| 2.17     | -4103.43704 | -4105.63527 | -4106.10479 | -4105.91684 | -4106.38815 | -4106.27753 | -4106.74331 | -4107.20692 | -4107.72156 |
| 2.27     | -4103.96285 | -4106.15264 | -4106.62217 | -4106.43553 | -4106.90685 | -4106.79590 | -4107.26152 | -4107.72208 | -4108.23678 |
| 2.36     | -4104.38917 | -4106.56681 | -4107.03611 | -4106.85071 | -4107.32177 | -4107.21148 | -4107.67658 | -4108.13532 | -4108.64950 |
| 2.46     | -4104.73767 | -4106.90563 | -4107.37400 | -4107.19042 | -4107.66004 | -4107.55173 | -4108.01612 | -4108.47283 | -4108.98493 |
| 2.55     | -4105.01983 | -4107.18076 | -4107.64847 | -4107.46644 | -4107.93521 | -4107.82772 | -4108.29152 | -4108.74601 | -4109.25691 |
| 2.65     | -4105.24765 | -4107.40256 | -4107.86996 | -4107.68911 | -4108.15754 | -4108.05034 | -4108.51380 | -4108.96589 | -4109.47635 |
| 2.74     | -4105.43200 | -4107.58175 | -4108.04905 | -4107.86913 | -4108.33747 | -4108.23038 | -4108.69371 | -4109.14333 | -4109.65374 |
| 2.83     | -4105.57146 | -4107.71336 | -4108.18146 | -4108.00030 | -4108.46993 | -4108.36685 | -4108.83195 | -4109.26592 | -4109.77895 |
| 2.93     | -4105.70422 | -4107.84493 | -4108.31304 | -4108.13259 | -4108.60227 | -4108.49909 | -4108.96401 | -4109.39647 | -4109.90950 |
| 3.02     | -4105.81476 | -4107.95531 | -4108.42351 | -4108.24368 | -4108.71353 | -4108.60989 | -4109.07461 | -4109.50615 | -4110.01935 |
| 3.12     | -4105.90758 | -4108.04814 | -4108.51647 | -4108.33717 | -4108.80740 | -4108.70283 | -4109.16720 | -4109.59831 | -4110.11200 |
| 3.21     | -4105.98683 | -4108.12584 | -4108.59416 | -4108.41543 | -4108.88610 | -4108.78043 | -4109.24420 | -4109.67495 | -4110.18928 |
| 3.31     | -4106.05431 | -4108.19045 | -4108.65846 | -4108.48048 | -4108.95110 | -4108.84527 | -4109.30848 | -4109.73838 | -4110.25272 |
| 3.40     | -4106.11104 | -4108.24437 | -4108.71204 | -4108.53478 | -4109.00523 | -4108.89957 | -4109.36228 | -4109.79124 | -4110.30541 |

Table S16: The absolute energies in hartree of the potential energy curve of NbSi in the  $^4\Pi$  state with a SP-based wave function and nom-CPO active space.

| Distance | SP          | tpbe        | ftpbe                   | trevpbe     | ftrevpbe    | tblyp       | ftblyp      | torelyp     | ftorelyp    |
|----------|-------------|-------------|-------------------------|-------------|-------------|-------------|-------------|-------------|-------------|
| 3.50     | -4106.15839 | -4108.28918 | -4108.75653 -4108.57994 | -4109.05020 | -4108.94480 | -4109.40707 | -4109.83511 | -4110.34906 |             |
| 3.59     | -4106.19765 | -4108.32615 | -4108.79319 -4108.61724 | -4109.08730 | -4108.98222 | -4109.44407 | -4109.87124 | -4110.38494 |             |
| 3.68     | -4106.22997 | -4108.35635 | -4108.82312 -4108.64775 | -4109.11762 | -4109.01291 | -4109.47438 | -4109.90071 | -4110.41417 |             |
| 3.78     | -4106.25634 | -4108.38081 | -4108.84733 -4108.67250 | -4109.14220 | -4109.03787 | -4109.49900 | -4109.92454 | -4110.43777 |             |
| 3.87     | -4106.27762 | -4108.40039 | -4108.86670 -4108.69235 | -4109.16191 | -4109.05795 | -4109.51877 | -4109.94358 | -4110.45661 |             |
| 3.97     | -4106.29454 | -4108.41577 | -4108.88190 -4108.70800 | -4109.17743 | -4109.07387 | -4109.53439 | -4109.95850 | -4110.47136 |             |
| 4.06     | -4106.30775 | -4108.42759 | -4108.89356 -4108.72008 | -4109.18940 | -4109.08622 | -4109.54648 | -4109.96993 | -4110.48263 |             |
| 4.16     | -4106.31688 | -4108.43554 | -4108.90147 -4108.72839 | -4109.19765 | -4109.09461 | -4109.55485 | -4109.97859 | -4110.49112 |             |
| 4.35     | -4106.32449 | -4108.44191 | -4108.90771 -4108.73500 | -4109.20417 | -4109.10153 | -4109.56150 | -4109.98468 | -4110.49710 |             |
| 4.44     | -4106.32985 | -4108.44619 | -4108.91186 -4108.73948 | -4109.20858 | -4109.10635 | -4109.56604 | -4109.98871 | -4110.50103 |             |
| 4.54     | -4106.33334 | -4108.44871 | -4108.91427 -4108.74219 | -4109.21124 | -4109.10940 | -4109.56882 | -4109.99102 | -4110.50325 |             |
| 4.63     | -4106.33528 | -4108.44979 | -4108.91525 -4108.74346 | -4109.21246 | -4109.11100 | -4109.57015 | -4109.99192 | -4110.50406 |             |
| 4.72     | -4106.33594 | -4108.44971 | -4108.91507 -4108.74354 | -4109.21251 | -4109.11143 | -4109.57030 | -4109.99167 | -4110.50375 |             |
| 4.82     | -4106.33556 | -4108.44868 | -4108.91396 -4108.74267 | -4109.21162 | -4109.11091 | -4109.56949 | -4109.99050 | -4110.50251 |             |
| 4.91     | -4106.33435 | -4108.44689 | -4108.91209             | -4108.73875 | -4109.20997 | -4109.10960 | -4109.56790 | -4109.98857 | -4110.50052 |
| 5.01     | -4106.33249 | -4108.44448 | -4108.90962             | -4108.73599 | -4109.20770 | -4109.10766 | -4109.56567 | -4109.98602 | -4110.49793 |
| 5.10     | -4106.33012 | -4108.44160 | -4108.90667             | -4108.73286 | -4109.20496 | -4109.10523 | -4109.56294 | -4109.98299 | -4110.49486 |
| 5.20     | -4106.32738 | -4108.43836 | -4108.90339             | -4108.72947 | -4109.20188 | -4109.10242 | -4109.55983 | -4109.97961 | -4110.49145 |
| 5.29     | -4106.32438 | -4108.43486 | -4108.89984             | -4108.72586 | -4109.19853 | -4109.09933 | -4109.55643 | -4109.97594 | -4110.48776 |
| 5.39     | -4106.32121 | -4108.43116 | -4108.89610             | -4108.72212 | -4109.19498 | -4109.09601 | -4109.55282 | -4109.97206 | -4110.48387 |
| 5.48     | -4106.31793 | -4108.42733 | -4108.89223             | -4108.71830 | -4109.19130 | -4109.09252 | -4109.54904 | -4109.96803 | -4110.47984 |
| 5.57     | -4106.31460 | -4108.42342 | -4108.88828             | -4108.71448 | -4109.18754 | -4109.08895 | -4109.54518 | -4109.96394 | -4110.47574 |
| 5.67     | -4106.31126 | -4108.41952 | -4108.88434             | -4108.71072 | -4109.18377 | -4109.08536 | -4109.54131 | -4109.95986 | -4110.47165 |
| 5.76     | -4106.30794 | -4108.41568 | -4108.88046             | -4108.70706 | -4109.18006 | -4109.08183 | -4109.53750 | -4109.95587 | -4110.46764 |
| 5.86     | -4106.30466 | -4108.41195 | -4108.87668             | -4108.70368 | -4109.17644 | -4109.07838 | -4109.53378 | -4109.95199 | -4110.46377 |
| 5.95     | -4106.30145 | -4108.40849 | -4108.87316             | -4108.70058 | -4109.17307 | -4109.07522 | -4109.53035 | -4109.94850 | -4110.46020 |
| 6.05     | -4106.29831 | -4108.40533 | -4108.86993             | -4108.69826 | -4109.17000 | -4109.07234 | -4109.52720 | -4109.94538 | -4110.45701 |
| 6.14     | -4106.29527 | -4108.40293 | -4108.86749             | -4108.69338 | -4109.16775 | -4109.07023 | -4109.52486 | -4109.94342 | -4110.45499 |
| 6.24     | -4106.29261 | -4108.39786 | -4108.86335             | -4108.68990 | -4109.16425 | -4109.06530 | -4109.52057 | -4109.93986 | -4110.45227 |
| 6.33     | -4106.29032 | -4108.39432 | -4108.85996             | -4108.68688 | -4109.16107 | -4109.06191 | -4109.51710 | -4109.93624 | -4110.44881 |
| 6.43     | -4106.28820 | -4108.39126 | -4108.85701             | -4108.66026 | -4109.15830 | -4109.05900 | -4109.51409 | -4109.93305 | -4110.44574 |
| 6.52     | -4106.28358 | -4108.36402 | -4108.83113             | -4108.65659 | -4109.13253 | -4109.03146 | -4109.48880 | -4109.90127 | -4110.44290 |
| 6.61     | -4106.28121 | -4108.36024 | -4108.82743             | -4108.65356 | -4109.12896 | -4109.02798 | -4109.48538 | -4109.89767 | -4110.44021 |
| 6.71     | -4106.27891 | -4108.35711 | -4108.82434             | -4108.65085 | -4109.12595 | -4109.02518 | -4109.48259 | -4109.89475 | -4110.43765 |
| 6.80     | -4106.27667 | -4108.35431 | -4108.82156             | -4108.64837 | -4109.12325 | -4109.02273 | -4109.48016 | -4109.89217 | -4110.43520 |
| 6.90     | -4106.27451 | -4108.35175 | -4108.81902             | -4108.64610 | -4109.12078 | -4109.02055 | -4109.47800 | -4109.88987 | -4110.43288 |
| 6.99     | -4106.27241 | -4108.34940 | -4108.81669             | -4108.64401 | -4109.11850 | -4109.01859 | -4109.47607 | -4109.88778 | -4110.43068 |
| 7.09     | -4106.27040 | -4108.34723 | -4108.81454             | -4108.64205 | -4109.11640 | -4109.01684 | -4109.47437 | -4109.88590 | -4110.42859 |
| 7.18     | -4106.26848 | -4108.34520 | -4108.81254             | -4108.64025 | -4109.11443 | -4109.01525 | -4109.47284 | -4109.88419 | -4110.42661 |
| 7.28     | -4106.26665 | -4108.34332 | -4108.81069             | -4108.63857 | -4109.11260 | -4109.01382 | -4109.47148 | -4109.88264 | -4110.42470 |
| 7.37     | -4106.26491 | -4108.34157 | -4108.80897             | -4108.63701 | -4109.11089 | -4109.01254 | -4109.47029 | -4109.88124 | -4110.42290 |
| 7.46     | -4106.26328 | -4108.33994 | -4108.80737             | -4108.63556 | -4109.10930 | -4109.01139 | -4109.46924 | -4109.87998 | -4110.42010 |
| 7.56     | -4106.26176 | -4108.33842 | -4108.80588             | -4108.63421 | -4109.10782 | -4109.01035 | -4109.46833 | -4109.87884 | -4110.41804 |
| 7.65     | -4106.26034 | -4108.33700 | -4108.80450             | -4108.63294 | -4109.10644 | -4109.00943 | -4109.46752 | -4109.87781 | -4110.41645 |
| 7.75     | -4106.25903 | -4108.33567 | -4108.80320             | -4108.63175 | -4109.10514 | -4109.00858 | -4109.46681 | -4109.87688 | -4110.41522 |
| 7.84     | -4106.25784 | -4108.33441 | -4108.80197             | -4108.63062 | -4109.10392 | -4109.00780 | -4109.46616 | -4109.87602 | -4110.41419 |
| 7.94     | -4106.25675 | -4108.33320 | -4108.80080             | -4108.62953 | -4109.10275 | -4109.00706 | -4109.46555 | -4109.87522 | -4110.41324 |
| 8.03     | -4106.25577 | -4108.33204 | -4108.79967             | -4108.62848 | -4109.10163 | -4109.00635 | -4109.46497 | -4109.87445 | -4110.41238 |
| 8.13     | -4106.25489 | -4108.33092 | -4108.79858             | -4108.62746 | -4109.10054 | -4109.00564 | -4109.46440 | -4109.87372 | -4110.41152 |
| 8.22     | -4106.25410 | -4108.32983 | -4108.79751             | -4108.62650 | -4109.09949 | -4109.00494 | -4109.46382 | -4109.87300 | -4110.41070 |
| 8.31     | -4106.25340 | -4108.32880 | -4108.79650             | -4108.62558 | -4109.09850 | -4109.00427 | -4109.46326 | -4109.87233 | -4110.40995 |
| 8.41     | -4106.25278 | -4108.32780 | -4108.79552             | -4108.62471 | -4109.09755 | -4109.00360 | -4109.46270 | -4109.87168 | -4110.40930 |

Table S16: The absolute energies in hartree of the potential energy curve of NbSi in the  $^4\Pi$  state with a SP-based wave function and nom-CPO active space.

| Distance | SP          | tpbe        | ftpbe       | trevpbe     | ftrevpbe    | tblyp       | ftblyp      | torelyp     | ftorelyp    |
|----------|-------------|-------------|-------------|-------------|-------------|-------------|-------------|-------------|-------------|
| 8.50     | -4106.25223 | -4108.32687 | -4108.79460 | -4108.62391 | -4109.09665 | -4109.00296 | -4109.46216 | -4109.87108 | -4110.40872 |
| 8.60     | -4106.25175 | -4108.32599 | -4108.79374 | -4108.62317 | -4109.09582 | -4109.00235 | -4109.46164 | -4109.87052 | -4110.40822 |
| 8.69     | -4106.25132 | -4108.32518 | -4108.79294 | -4108.62248 | -4109.09506 | -4109.00178 | -4109.46115 | -4109.87000 | -4110.40780 |
| 8.79     | -4106.25094 | -4108.32443 | -4108.79220 | -4108.62186 | -4109.09435 | -4109.00125 | -4109.46068 | -4109.86953 | -4110.40741 |
| 8.88     | -4106.25061 | -4108.32374 | -4108.79151 | -4108.62124 | -4109.09371 | -4109.00075 | -4109.46025 | -4109.86911 | -4110.40702 |
| 8.98     | -4106.25032 | -4108.32305 | -4108.79083 | -4108.62072 | -4109.09307 | -4109.00024 | -4109.45981 | -4109.86869 | -4110.40661 |
| 9.07     | -4106.25007 | -4108.32246 | -4108.79024 | -4108.62032 | -4109.09251 | -4108.99981 | -4109.45941 | -4109.86834 | -4110.40622 |
| 9.17     | -4106.24984 | -4108.32200 | -4108.78977 | -4108.61999 | -4109.09209 | -4108.99947 | -4109.45911 | -4109.86809 | -4110.40586 |
| 9.26     | -4106.24964 | -4108.32161 | -4108.78937 | -4108.61971 | -4109.09173 | -4108.99920 | -4109.45885 | -4109.86790 | -4110.40555 |
| 9.35     | -4106.24946 | -4108.32128 | -4108.78902 | -4108.61948 | -4109.09142 | -4108.99897 | -4109.45863 | -4109.86775 | -4110.40529 |
| 9.45     | -4106.24930 | -4108.32099 | -4108.78873 | -4108.61929 | -4109.09116 | -4108.99878 | -4109.45845 | -4109.86764 | -4110.40506 |
| 9.54     | -4106.24915 | -4108.32075 | -4108.78847 | -4108.61914 | -4109.09094 | -4108.99862 | -4109.45829 | -4109.86756 | -4110.40486 |
| 9.64     | -4106.24902 | -4108.32055 | -4108.78825 | -4108.61899 | -4109.09076 | -4108.99850 | -4109.45816 | -4109.86752 | -4110.40466 |
| 9.73     | -4106.24890 | -4108.32036 | -4108.78804 | -4108.61886 | -4109.09059 | -4108.99838 | -4109.45803 | -4109.86747 | -4110.40444 |
| 9.83     | -4106.24879 | -4108.32018 | -4108.78784 | -4108.61874 | -4109.09043 | -4108.99827 | -4109.45791 | -4109.86742 | -4110.40418 |
| 9.92     | -4106.24869 | -4108.32002 | -4108.78767 | -4108.61866 | -4109.09029 | -4108.99817 | -4109.45781 | -4109.86738 | -4110.40399 |
| 10.02    | -4106.24860 | -4108.31989 | -4108.78753 | -4108.61855 | -4109.09018 | -4108.99811 | -4109.45773 | -4109.86737 | -4110.40385 |
| 10.11    | -4106.24852 | -4108.31975 | -4108.78737 | -4108.61846 | -4109.09006 | -4108.99802 | -4109.45764 | -4109.86734 | -4110.40370 |
| 10.20    | -4106.24844 | -4108.31961 | -4108.78723 | -4108.61838 | -4109.08994 | -4108.99794 | -4109.45755 | -4109.86731 | -4110.40357 |
| 10.30    | -4106.24837 | -4108.31951 | -4108.78711 | -4108.61833 | -4109.08985 | -4108.99788 | -4109.45749 | -4109.86729 | -4110.40344 |
| 10.39    | -4106.24831 | -4108.31942 | -4108.78701 | -4108.61828 | -4109.08979 | -4108.99785 | -4109.45744 | -4109.86730 | -4110.40332 |
| 10.49    | -4106.24825 | -4108.31933 | -4108.78692 | -4108.61823 | -4109.08971 | -4108.99780 | -4109.45739 | -4109.86729 | -4110.40322 |
| 10.58    | -4106.24820 | -4108.31925 | -4108.78683 | -4108.61818 | -4109.08965 | -4108.99776 | -4109.45734 | -4109.86729 | -4110.40312 |
| 10.68    | -4106.24815 | -4108.31918 | -4108.78674 | -4108.61814 | -4109.08959 | -4108.99773 | -4109.45730 | -4109.86729 | -4110.40301 |
| 10.77    | -4106.24810 | -4108.31911 | -4108.78667 | -4108.61811 | -4109.08954 | -4108.99770 | -4109.45727 | -4109.86730 | -4110.40291 |
| 10.87    | -4106.24806 | -4108.31906 | -4108.78661 | -4108.61809 | -4109.08950 | -4108.99768 | -4109.45724 | -4109.86731 | -4110.40284 |
| 10.96    | -4106.24802 | -4108.31900 | -4108.78655 | -4108.61806 | -4109.08946 | -4108.99767 | -4109.45722 | -4109.86732 | -4110.40280 |
| 11.05    | -4106.24798 | -4108.31895 | -4108.78649 | -4108.61803 | -4109.08942 | -4108.99765 | -4109.45720 | -4109.86732 | -4110.40276 |
| 11.15    | -4106.24795 | -4108.31891 | -4108.78643 | -4108.61801 | -4109.08939 | -4108.99763 | -4109.45718 | -4109.86733 | -4110.40270 |
| 11.24    | -4106.24792 | -4108.31887 | -4108.78639 | -4108.61799 | -4109.08936 | -4108.99762 | -4109.45716 | -4109.86734 | -4110.40263 |
| 11.34    | -4106.24789 | -4108.31883 | -4108.78634 | -4108.61798 | -4109.08933 | -4108.99761 | -4109.45714 | -4109.86734 | -4110.40255 |
| 11.43    | -4106.24786 | -4108.31879 | -4108.78630 | -4108.61796 | -4109.08931 | -4108.99760 | -4109.45713 | -4109.86735 | -4110.40250 |
| 11.53    | -4106.24783 | -4108.31876 | -4108.78626 | -4108.61795 | -4109.08928 | -4108.99760 | -4109.45712 | -4109.86736 | -4110.40245 |
| 11.62    | -4106.24781 | -4108.31873 | -4108.78623 | -4108.61794 | -4109.08926 | -4108.99759 | -4109.45711 | -4109.86736 | -4110.40237 |
| 11.72    | -4106.24779 | -4108.31871 | -4108.78620 | -4108.61793 | -4109.08925 | -4108.99759 | -4109.45710 | -4109.86738 | -4110.40231 |
| 11.81    | -4106.24777 | -4108.31869 | -4108.78618 | -4108.61793 | -4109.08923 | -4108.99759 | -4109.45710 | -4109.86739 | -4110.40226 |
| 11.91    | -4106.24775 | -4108.31867 | -4108.78615 | -4108.61792 | -4109.08922 | -4108.99760 | -4109.45710 | -4109.86740 | -4110.40224 |
| 12.00    | -4106.24773 | -4108.31865 | -4108.78613 | -4108.61792 | -4109.08921 | -4108.99760 | -4109.45710 | -4109.86741 | -4110.40223 |
| 12.09    | -4106.24771 | -4108.31863 | -4108.78611 | -4108.61791 | -4109.08920 | -4108.99761 | -4109.45710 | -4109.86742 | -4110.40221 |
| 12.19    | -4106.24770 | -4108.31862 | -4108.78610 | -4108.61791 | -4109.08919 | -4108.99761 | -4109.45711 | -4109.86742 | -4110.40218 |
| 12.28    | -4106.24768 | -4108.31860 | -4108.78608 | -4108.61790 | -4109.08918 | -4108.99762 | -4109.45711 | -4109.86743 | -4110.40216 |
| 12.38    | -4106.24767 | -4108.31859 | -4108.78606 | -4108.61790 | -4109.08917 | -4108.99762 | -4109.45711 | -4109.86744 | -4110.40214 |
| 12.47    | -4106.24765 | -4108.31858 | -4108.78604 | -4108.61789 | -4109.08916 | -4108.99762 | -4109.45711 | -4109.86744 | -4110.40213 |
| 12.57    | -4106.24764 | -4108.31856 | -4108.78603 | -4108.61789 | -4109.08915 | -4108.99763 | -4109.45711 | -4109.86744 | -4110.40212 |
| 12.66    | -4106.24763 | -4108.31855 | -4108.78601 | -4108.61789 | -4109.08914 | -4108.99763 | -4109.45711 | -4109.86745 | -4110.40211 |
| 12.76    | -4106.24762 | -4108.31854 | -4108.78600 | -4108.61788 | -4109.08914 | -4108.99764 | -4109.45711 | -4109.86745 | -4110.40208 |
| 12.85    | -4106.24761 | -4108.31853 | -4108.78599 | -4108.61788 | -4109.08913 | -4108.99764 | -4109.45711 | -4109.86745 | -4110.40204 |
| 12.94    | -4106.24760 | -4108.31852 | -4108.78598 | -4108.61788 | -4109.08912 | -4108.99765 | -4109.45712 | -4109.86746 | -4110.40201 |
| 13.04    | -4106.24759 | -4108.31852 | -4108.78597 | -4108.61788 | -4109.08912 | -4108.99765 | -4109.45712 | -4109.86746 | -4110.40199 |
| 13.13    | -4106.24758 | -4108.31851 | -4108.78597 | -4108.61788 | -4109.08912 | -4108.99766 | -4109.45713 | -4109.86747 | -4110.40197 |
| 13.23    | -4106.24757 | -4108.31851 | -4108.78596 | -4108.61788 | -4109.08911 | -4108.99767 | -4109.45713 | -4109.86747 | -4110.40196 |
| 13.32    | -4106.24756 | -4108.31851 | -4108.78595 | -4108.61788 | -4109.08911 | -4108.99768 | -4109.45714 | -4109.86748 | -4110.40195 |

Table S16: The absolute energies in hartree of the potential energy curve of NbSi in the  $^4\Pi$  state with a SP-based wave function and nom-CPO active space.

| Distance | SP          | tpbe        | ftpbe       | trevpbe     | ftrevpbe    | tblyp       | ftblyp      | torelyp     | ftorelyp    |
|----------|-------------|-------------|-------------|-------------|-------------|-------------|-------------|-------------|-------------|
| 13.42    | -4106.24755 | -4108.31850 | -4108.78595 | -4108.61788 | -4109.08911 | -4108.99769 | -4109.45715 | -4109.86748 | -4110.40195 |
| 13.51    | -4106.24755 | -4108.31850 | -4108.78595 | -4108.61788 | -4109.08911 | -4108.99770 | -4109.45716 | -4109.86749 | -4110.40194 |
| 13.61    | -4106.24754 | -4108.31850 | -4108.78594 | -4108.61788 | -4109.08911 | -4108.99770 | -4109.45716 | -4109.86749 | -4110.40193 |
| 13.70    | -4106.24753 | -4108.31849 | -4108.78594 | -4108.61788 | -4109.08911 | -4108.99771 | -4109.45717 | -4109.86749 | -4110.40193 |
| 13.80    | -4106.24753 | -4108.31849 | -4108.78593 | -4108.61788 | -4109.08910 | -4108.99772 | -4109.45717 | -4109.86750 | -4110.40192 |
| 13.89    | -4106.24752 | -4108.31849 | -4108.78593 | -4108.61788 | -4109.08910 | -4108.99772 | -4109.45718 | -4109.86750 | -4110.40192 |
| 13.98    | -4106.24751 | -4108.31848 | -4108.78592 | -4108.61788 | -4109.08910 | -4108.99773 | -4109.45718 | -4109.86750 | -4110.40191 |
| 14.08    | -4106.24751 | -4108.31848 | -4108.78592 | -4108.61788 | -4109.08909 | -4108.99773 | -4109.45718 | -4109.86750 | -4110.40190 |
| 14.17    | -4106.24750 | -4108.31848 | -4108.78591 | -4108.61788 | -4109.08909 | -4108.99773 | -4109.45719 | -4109.86750 | -4110.40190 |
| 14.27    | -4106.24750 | -4108.31847 | -4108.78591 | -4108.61787 | -4109.08909 | -4108.99774 | -4109.45719 | -4109.86750 | -4110.40189 |
| 14.36    | -4106.24749 | -4108.31847 | -4108.78591 | -4108.61787 | -4109.08909 | -4108.99774 | -4109.45719 | -4109.86750 | -4110.40188 |
| 14.46    | -4106.24749 | -4108.31847 | -4108.78590 | -4108.61787 | -4109.08908 | -4108.99775 | -4109.45720 | -4109.86750 | -4110.40187 |
| 14.55    | -4106.24748 | -4108.31847 | -4108.78590 | -4108.61787 | -4109.08908 | -4108.99775 | -4109.45720 | -4109.86750 | -4110.40187 |
| 14.65    | -4106.24748 | -4108.31846 | -4108.78590 | -4108.61787 | -4109.08908 | -4108.99776 | -4109.45721 | -4109.86750 | -4110.40186 |
| 14.74    | -4106.24748 | -4108.31846 | -4108.78590 | -4108.61787 | -4109.08908 | -4108.99776 | -4109.45721 | -4109.86750 | -4110.40185 |
| 14.83    | -4106.24747 | -4108.31846 | -4108.78590 | -4108.61787 | -4109.08908 | -4108.99777 | -4109.45721 | -4109.86750 | -4110.40185 |
| 14.93    | -4106.24747 | -4108.31846 | -4108.78590 | -4108.61787 | -4109.08908 | -4108.99777 | -4109.45722 | -4109.86751 | -4110.40185 |
| 15.02    | -4106.24746 | -4108.31846 | -4108.78590 | -4108.61787 | -4109.08908 | -4108.99778 | -4109.45722 | -4109.86751 | -4110.40184 |
| 15.12    | -4106.24746 | -4108.31846 | -4108.78589 | -4108.61788 | -4109.08908 | -4108.99778 | -4109.45723 | -4109.86751 | -4110.40184 |
| 15.21    | -4106.24746 | -4108.31846 | -4108.78589 | -4108.61788 | -4109.08908 | -4108.99778 | -4109.45723 | -4109.86751 | -4110.40184 |
| 15.31    | -4106.24746 | -4108.31846 | -4108.78589 | -4108.61788 | -4109.08908 | -4108.99779 | -4109.45723 | -4109.86751 | -4110.40184 |
| 15.40    | -4106.24745 | -4108.31846 | -4108.78589 | -4108.61788 | -4109.08908 | -4108.99779 | -4109.45724 | -4109.86751 | -4110.40184 |
| 15.50    | -4106.24745 | -4108.31846 | -4108.78589 | -4108.61788 | -4109.08908 | -4108.99779 | -4109.45724 | -4109.86751 | -4110.40183 |
| 15.59    | -4106.24745 | -4108.31846 | -4108.78589 | -4108.61787 | -4109.08908 | -4108.99780 | -4109.45724 | -4109.86751 | -4110.40183 |
| 15.68    | -4106.24744 | -4108.31846 | -4108.78589 | -4108.61787 | -4109.08908 | -4108.99780 | -4109.45724 | -4109.86751 | -4110.40183 |
| 15.78    | -4106.24744 | -4108.31846 | -4108.78589 | -4108.61787 | -4109.08907 | -4108.99780 | -4109.45725 | -4109.86751 | -4110.40183 |
| 15.87    | -4106.24744 | -4108.31846 | -4108.78589 | -4108.61787 | -4109.08907 | -4108.99780 | -4109.45725 | -4109.86751 | -4110.4     |

Table S17: The absolute energies in hartree of the potential energy curve of NbSi in the  $^2\Delta$  state with a SP-based wave function and nom-CPO active space.

| Distance | SP          | tpbe        | ftpbe       | trevpbe     | ftrevpbe    | tblyp       | ftblyp      | torelyp     | ftorelyp    |
|----------|-------------|-------------|-------------|-------------|-------------|-------------|-------------|-------------|-------------|
| 1.98     | -4102.60236 | -4104.80299 | -4105.27431 | -4105.08228 | -4105.55746 | -4105.44185 | -4105.90594 | -4106.37105 | -4106.88759 |
| 2.08     | -4103.26773 | -4105.46058 | -4105.93187 | -4105.74088 | -4106.21619 | -4106.10097 | -4106.56478 | -4107.02520 | -4107.54194 |
| 2.17     | -4103.80451 | -4105.99007 | -4106.46150 | -4106.27136 | -4106.74699 | -4106.63191 | -4107.09562 | -4107.55153 | -4108.06865 |
| 2.27     | -4104.23660 | -4106.41587 | -4106.88759 | -4106.69811 | -4107.17421 | -4107.05906 | -4107.52286 | -4107.97445 | -4108.49211 |
| 2.36     | -4104.58448 | -4106.75872 | -4107.23082 | -4107.04186 | -4107.51852 | -4107.40320 | -4107.86721 | -4108.31473 | -4108.83303 |
| 2.46     | -4104.86521 | -4107.03563 | -4107.50813 | -4107.31960 | -4107.79682 | -4107.68131 | -4108.14560 | -4108.58934 | -4109.10828 |
| 2.55     | -4105.09276 | -4107.26057 | -4107.73341 | -4107.54533 | -4108.02300 | -4107.90739 | -4108.37193 | -4108.81229 | -4109.33179 |
| 2.65     | -4105.31671 | -4107.44457 | -4107.91763 | -4107.73005 | -4108.20802 | -4108.09246 | -4108.55718 | -4108.99458 | -4109.51446 |
| 2.74     | -4105.47744 | -4107.59634 | -4108.06948 | -4107.88250 | -4108.36057 | -4108.24523 | -4108.71001 | -4109.14493 | -4109.66497 |
| 2.83     | -4105.61381 | -4107.72260 | -4108.19566 | -4108.00939 | -4108.48734 | -4108.37242 | -4108.83710 | -4109.27000 | -4109.79001 |
| 2.93     | -4105.73037 | -4107.82827 | -4108.30113 | -4108.11567 | -4108.59334 | -4108.47889 | -4108.94339 | -4109.37472 | -4109.89450 |
| 3.02     | -4105.83126 | -4107.91706 | -4108.38966 | -4108.20506 | -4108.68236 | -4108.56837 | -4109.03261 | -4109.46270 | -4109.98218 |
| 3.12     | -4105.91740 | -4107.99181 | -4108.46415 | -4108.28038 | -4108.75732 | -4108.64370 | -4109.10771 | -4109.53667 | -4110.05593 |
| 3.21     | -4105.99082 | -4108.05478 | -4108.52693 | -4108.34390 | -4108.82056 | -4108.70717 | -4109.17099 | -4109.59882 | -4110.11799 |
| 3.31     | -4106.05326 | -4108.19089 | -4108.65954 | -4108.47975 | -4108.95382 | -4108.84310 | -4109.30142 | -4109.73213 | -4110.24972 |
| 3.40     | -4106.10620 | -4108.24169 | -4108.70978 | -4108.53084 | -4109.00440 | -4108.89451 | -4109.35223 | -4109.78182 | -4110.29888 |
| 3.50     | -4106.15091 | -4108.28437 | -4108.75196 | -4108.57382 | -4109.04691 | -4108.93782 | -4109.39499 | -4109.82358 | -4110.34014 |
| 3.59     | -4106.18848 | -4108.32001 | -4108.78715 | -4108.60976 | -4109.08241 | -4108.97409 | -4109.43079 | -4109.85845 | -4110.37454 |
| 3.68     | -4106.21986 | -4108.34960 | -4108.81634 | -4108.63964 | -4109.11189 | -4109.00431 | -4109.46059 | -4109.88740 | -4110.40306 |
| 3.78     | -4106.24588 | -4108.37399 | -4108.84038 | -4108.66433 | -4109.13622 | -4109.02932 | -4109.48524 | -4109.91126 | -4110.42653 |
| 3.87     | -4106.26725 | -4108.39387 | -4108.85994 | -4108.68449 | -4109.15605 | -4109.04982 | -4109.50541 | -4109.93069 | -4110.44559 |
| 3.97     | -4106.28462 | -4108.40985 | -4108.87563 | -4108.70075 | -4109.17200 | -4109.06641 | -4109.52171 | -4109.94630 | -4110.46088 |
| 4.06     | -4106.29854 | -4108.42252 | -4108.88804 | -4108.71368 | -4109.18466 | -4109.07967 | -4109.53471 | -4109.95868 | -4110.47294 |
| 4.16     | -4106.30948 | -4108.43236 | -4108.89765 | -4108.72378 | -4109.19452 | -4109.09010 | -4109.54492 | -4109.96828 | -4110.48226 |
| 4.35     | -4106.31789 | -4108.43977 | -4108.90486 | -4108.73143 | -4109.20195 | -4109.09809 | -4109.55271 | -4109.97551 | -4110.48923 |
| 4.44     | -4106.32412 | -4108.44511 | -4108.91002 | -4108.73700 | -4109.20732 | -4109.10399 | -4109.55843 | -4109.98072 | -4110.49420 |
| 4.54     | -4106.32850 | -4108.44871 | -4108.91345 | -4108.74082 | -4109.21096 | -4109.10814 | -4109.56242 | -4109.98423 | -4110.49748 |
| 4.63     | -4106.33132 | -4108.45085 | -4108.91545 | -4108.74318 | -4109.21316 | -4109.11083 | -4109.56497 | -4109.98632 | -4110.49937 |
| 4.72     | -4106.33282 | -4108.45178 | -4108.91626 | -4108.74431 | -4109.21415 | -4109.11230 | -4109.56631 | -4109.98724 | -4110.50010 |
| 4.82     | -4106.33322 | -4108.45169 | -4108.91606 | -4108.74441 | -4109.21413 | -4109.11272 | -4109.56663 | -4109.98717 | -4110.49986 |
| 4.91     | -4106.33271 | -4108.45075 | -4108.91503 | -4108.74365 | -4109.21326 | -4109.11229 | -4109.56611 | -4109.98627 | -4110.49881 |
| 5.01     | -4106.33144 | -4108.44911 | -4108.91332 | -4108.74219 | -4109.21171 | -4109.11116 | -4109.56490 | -4109.98471 | -4110.49711 |
| 5.10     | -4106.32955 | -4108.44694 | -4108.91108 | -4108.74018 | -4109.20963 | -4109.10948 | -4109.56315 | -4109.98264 | -4110.49490 |
| 5.20     | -4106.32717 | -4108.44434 | -4108.90843 | -4108.73774 | -4109.20713 | -4109.10736 | -4109.56097 | -4109.98016 | -4110.49231 |
| 5.29     | -4106.32439 | -4108.44140 | -4108.90545 | -4108.73496 | -4109.20430 | -4109.10489 | -4109.55845 | -4109.97736 | -4110.48941 |
| 5.39     | -4106.32131 | -4108.43820 | -4108.90222 | -4108.73189 | -4109.20120 | -4109.10215 | -4109.55566 | -4109.97431 | -4110.48628 |
| 5.48     | -4106.31800 | -4108.43480 | -4108.89881 | -4108.72864 | -4109.19793 | -4109.09921 | -4109.55269 | -4109.97108 | -4110.48299 |
| 5.57     | -4106.31452 | -4108.43130 | -4108.89530 | -4108.72526 | -4109.19454 | -4109.09614 | -4109.54959 | -4109.96777 | -4110.47961 |
| 5.67     | -4106.31094 | -4108.42774 | -4108.89175 | -4108.72183 | -4109.19111 | -4109.09302 | -4109.54643 | -4109.96441 | -4110.47621 |
| 5.76     | -4106.30729 | -4108.42417 | -4108.88818 | -4108.71839 | -4109.18767 | -4109.08987 | -4109.54325 | -4109.96106 | -4110.47282 |
| 5.86     | -4106.30362 | -4108.42065 | -4108.88466 | -4108.71497 | -4109.18427 | -4109.08676 | -4109.54010 | -4109.95777 | -4110.46949 |
| 5.95     | -4106.29996 | -4108.41716 | -4108.88118 | -4108.71159 | -4109.18090 | -4109.08368 | -4109.53697 | -4109.95453 | -4110.46622 |
| 6.05     | -4106.29636 | -4108.41375 | -4108.87778 | -4108.70827 | -4109.17761 | -4109.08066 | -4109.53389 | -4109.95138 | -4110.46304 |
| 6.14     | -4106.29283 | -4108.41043 | -4108.87446 | -4108.70504 | -4109.17440 | -4109.07772 | -4109.53086 | -4109.94833 | -4110.45996 |
| 6.24     | -4106.28941 | -4108.40721 | -4108.87122 | -4108.70189 | -4109.17127 | -4109.07486 | -4109.52788 | -4109.94538 | -4110.45697 |
| 6.33     | -4106.28613 | -4108.40404 | -4108.86803 | -4108.69879 | -4109.16819 | -4109.07205 | -4109.52492 | -4109.94248 | -4110.45402 |
| 6.43     | -4106.28301 | -4108.40091 | -4108.86487 | -4108.69571 | -4109.16514 | -4109.06924 | -4109.52193 | -4109.93958 | -4110.45107 |
| 6.52     | -4106.28009 | -4108.39780 | -4108.86171 | -4108.69264 | -4109.16211 | -4109.06641 | -4109.51889 | -4109.93666 | -4110.44809 |
| 6.61     | -4106.27737 | -4108.39469 | -4108.85856 | -4108.68957 | -4109.15908 | -4109.06355 | -4109.51580 | -4109.93370 | -4110.44506 |
| 6.71     | -4106.27488 | -4108.39160 | -4108.85542 | -4108.68651 | -4109.15607 | -4109.06067 | -4109.51266 | -4109.93069 | -4110.44199 |
| 6.80     | -4106.27263 | -4108.38856 | -4108.85230 | -4108.68349 | -4109.15308 | -4109.05780 | -4109.50949 | -4109.92767 | -4110.43888 |
| 6.90     | -4106.27062 | -4108.38559 | -4108.84926 | -4108.68054 | -4109.15017 | -4109.05497 | -4109.50636 | -4109.92467 | -4110.43578 |

Table S17: The absolute energies in hartree of the potential energy curve of NbSi in the  $^2\Delta$  state with a SP-based wave function and nom-CPO active space.

| Distance | SP          | tpbe        | ftpbe       | trevpbe     | ftrevpbe    | tblyp       | ftblyp      | torelyp     | ftorelyp    |
|----------|-------------|-------------|-------------|-------------|-------------|-------------|-------------|-------------|-------------|
| 6.99     | -4106.26884 | -4108.38274 | -4108.84631 | -4108.67770 | -4109.14736 | -4109.05221 | -4109.50329 | -4109.92172 | -4110.43273 |
| 7.09     | -4106.26730 | -4108.38002 | -4108.84348 | -4108.67500 | -4109.14467 | -4109.04956 | -4109.50032 | -4109.91889 | -4110.42978 |
| 7.18     | -4106.26597 | -4108.37750 | -4108.84081 | -4108.67249 | -4109.14211 | -4109.04709 | -4109.49749 | -4109.91623 | -4110.42697 |
| 7.28     | -4106.26483 | -4108.37519 | -4108.83833 | -4108.67021 | -4109.13975 | -4109.04481 | -4109.49487 | -4109.91378 | -4110.42435 |
| 7.37     | -4106.26665 | -4108.37311 | -4108.83610 | -4108.66816 | -4109.13762 | -4109.04277 | -4109.49250 | -4109.91159 | -4110.42196 |
| 7.46     | -4106.26604 | -4108.37128 | -4108.83411 | -4108.66637 | -4109.13573 | -4109.04096 | -4109.49040 | -4109.90965 | -4110.41984 |
| 7.56     | -4106.26551 | -4108.36968 | -4108.83235 | -4108.66481 | -4109.13406 | -4109.03940 | -4109.48853 | -4109.90509 | -4110.41653 |
| 7.65     | -4106.26506 | -4108.36417 | -4108.82850 | -4108.66022 | -4109.13115 | -4109.03335 | -4109.48476 | -4109.90393 | -4110.41518 |
| 7.75     | -4106.26467 | -4108.36323 | -4108.82741 | -4108.65933 | -4109.13013 | -4109.03247 | -4109.48363 | -4109.90293 | -4110.41400 |
| 7.84     | -4106.26434 | -4108.36241 | -4108.82646 | -4108.65855 | -4109.12924 | -4109.03170 | -4109.48263 | -4109.90207 | -4110.41296 |
| 7.94     | -4106.26405 | -4108.36170 | -4108.82562 | -4108.65788 | -4109.12846 | -4109.03103 | -4109.48176 | -4109.90132 | -4110.41205 |
| 8.03     | -4106.26381 | -4108.36108 | -4108.82487 | -4108.65730 | -4109.12777 | -4109.03045 | -4109.48098 | -4109.90068 | -4110.41124 |
| 8.13     | -4106.26360 | -4108.36053 | -4108.82420 | -4108.65679 | -4109.12715 | -4109.02995 | -4109.48029 | -4109.90013 | -4110.41052 |
| 8.22     | -4106.26342 | -4108.36005 | -4108.82360 | -4108.65635 | -4109.12660 | -4109.02952 | -4109.47968 | -4109.89966 | -4110.40989 |
| 8.31     | -4106.26326 | -4108.35964 | -4108.82307 | -4108.65598 | -4109.12613 | -4109.02915 | -4109.47914 | -4109.89925 | -4110.40934 |
| 8.41     | -4106.26312 | -4108.35928 | -4108.82262 | -4108.65566 | -4109.12571 | -4109.02883 | -4109.47868 | -4109.89891 | -4110.40887 |
| 8.50     | -4106.26301 | -4108.35897 | -4108.82222 | -4108.65539 | -4109.12536 | -4109.02856 | -4109.47828 | -4109.89863 | -4110.40846 |
| 8.60     | -4106.26291 | -4108.35870 | -4108.82187 | -4108.65516 | -4109.12505 | -4109.02834 | -4109.47793 | -4109.89839 | -4110.40811 |
| 8.69     | -4106.26282 | -4108.35846 | -4108.82157 | -4108.65496 | -4109.12479 | -4109.02814 | -4109.47762 | -4109.89819 | -4110.40780 |
| 8.79     | -4106.26275 | -4108.35825 | -4108.82130 | -4108.65479 | -4109.12456 | -4109.02797 | -4109.47736 | -4109.89802 | -4110.40753 |
| 8.88     | -4106.26268 | -4108.35807 | -4108.82105 | -4108.65464 | -4109.12435 | -4109.02783 | -4109.47712 | -4109.89787 | -4110.40730 |
| 8.98     | -4106.26262 | -4108.35791 | -4108.82084 | -4108.65452 | -4109.12417 | -4109.02771 | -4109.47691 | -4109.89776 | -4110.40709 |
| 9.07     | -4106.26257 | -4108.35777 | -4108.82064 | -4108.65441 | -4109.12400 | -4109.02760 | -4109.47672 | -4109.89766 | -4110.40690 |
| 9.17     | -4106.26253 | -4108.35765 | -4108.82046 | -4108.65432 | -4109.12385 | -4109.02751 | -4109.47655 | -4109.89758 | -4110.40674 |
| 9.26     | -4106.26249 | -4108.35754 | -4108.82030 | -4108.65424 | -4109.12372 | -4109.02744 | -4109.47639 | -4109.89751 | -4110.40659 |
| 9.35     | -4106.26246 | -4108.35745 | -4108.82015 | -4108.65418 | -4109.12361 | -4109.02738 | -4109.47626 | -4109.89747 | -4110.40647 |
| 9.45     | -4106.26243 | -4108.35737 | -4108.82003 | -4108.65413 | -4109.12351 | -4109.02734 | -4109.47615 | -4109.89743 | -4110.40637 |
| 9.54     | -4106.26240 | -4108.35730 | -4108.81992 | -4108.65409 | -4109.12343 | -4109.02730 | -4109.47605 | -4109.89741 | -4110.40628 |
| 9.64     | -4106.26238 | -4108.35724 | -4108.81983 | -4108.65406 | -4109.12336 | -4109.02727 | -4109.47596 | -4109.89739 | -4110.40620 |
| 9.73     | -4106.26236 | -4108.35719 | -4108.81974 | -4108.65404 | -4109.12330 | -4109.02724 | -4109.47589 | -4109.89738 | -4110.40614 |
| 9.83     | -4106.26234 | -4108.35714 | -4108.81967 | -4108.65402 | -4109.12325 | -4109.02722 | -4109.47583 | -4109.89738 | -4110.40608 |
| 9.92     | -4106.26233 | -4108.35710 | -4108.81960 | -4108.65400 | -4109.12321 | -4109.02721 | -4109.47577 | -4109.89738 | -4110.40603 |
| 10.02    | -4106.26231 | -4108.35707 | -4108.81953 | -4108.65399 | -4109.12316 | -4109.02720 | -4109.47571 | -4109.89738 | -4110.40598 |
| 10.11    | -4106.26230 | -4108.35704 | -4108.81947 | -4108.65398 | -4109.12312 | -4109.02719 | -4109.47566 | -4109.89739 | -4110.40594 |
| 10.20    | -4106.26229 | -4108.35701 | -4108.81941 | -4108.65398 | -4109.12308 | -4109.02718 | -4109.47562 | -4109.89740 | -4110.40590 |
| 10.30    | -4106.26228 | -4108.35698 | -4108.81936 | -4108.65398 | -4109.12305 | -4109.02718 | -4109.47557 | -4109.89742 | -4110.40587 |
| 10.39    | -4106.26227 | -4108.35697 | -4108.81931 | -4108.65398 | -4109.12302 | -4109.02718 | -4109.47554 | -4109.89744 | -4110.40584 |
| 10.49    | -4106.26226 | -4108.35695 | -4108.81927 | -4108.65399 | -4109.12300 | -4109.02719 | -4109.47550 | -4109.89746 | -4110.40582 |
| 10.58    | -4106.26225 | -4108.35694 | -4108.81924 | -4108.65399 | -4109.12298 | -4109.02720 | -4109.47548 | -4109.89748 | -4110.40580 |
| 10.68    | -4106.26225 | -4108.35693 | -4108.81921 | -4108.65400 | -4109.12296 | -4109.02720 | -4109.47546 | -4109.89750 | -4110.40579 |
| 10.77    | -4106.26224 | -4108.35692 | -4108.81918 | -4108.65401 | -4109.12295 | -4109.02721 | -4109.47544 | -4109.89753 | -4110.40578 |
| 10.87    | -4106.26223 | -4108.35691 | -4108.81916 | -4108.65402 | -4109.12295 | -4109.02722 | -4109.47543 | -4109.89755 | -4110.40577 |
| 10.96    | -4106.26223 | -4108.35690 | -4108.81914 | -4108.65403 | -4109.12294 | -4109.02723 | -4109.47542 | -4109.89757 | -4110.40577 |
| 11.05    | -4106.26222 | -4108.35690 | -4108.81912 | -4108.65404 | -4109.12293 | -4109.02724 | -4109.47541 | -4109.89759 | -4110.40576 |
| 11.15    | -4106.26222 | -4108.35689 | -4108.81910 | -4108.65405 | -4109.12292 | -4109.02725 | -4109.47540 | -4109.89761 | -4110.40575 |
| 11.24    | -4106.26221 | -4108.35689 | -4108.81908 | -4108.65406 | -4109.12291 | -4109.02726 | -4109.47539 | -4109.89763 | -4110.40574 |
| 11.34    | -4106.26221 | -4108.35688 | -4108.81906 | -4108.65407 | -4109.12291 | -4109.02727 | -4109.47538 | -4109.89765 | -4110.40574 |
| 11.43    | -4106.26220 | -4108.35688 | -4108.81904 | -4108.65408 | -4109.12290 | -4109.02728 | -4109.47536 | -4109.89767 | -4110.40573 |
| 11.53    | -4106.26220 | -4108.35687 | -4108.81902 | -4108.65409 | -4109.12289 | -4109.02729 | -4109.47535 | -4109.89769 | -4110.40572 |
| 11.62    | -4106.26220 | -4108.35687 | -4108.81901 | -4108.65410 | -4109.12288 | -4109.02730 | -4109.47535 | -4109.89771 | -4110.40571 |
| 11.72    | -4106.26219 | -4108.35687 | -4108.81900 | -4108.65411 | -4109.12288 | -4109.02732 | -4109.47534 | -4109.89773 | -4110.40571 |
| 11.81    | -4106.26219 | -4108.35687 | -4108.81899 | -4108.65412 | -4109.12288 | -4109.02733 | -4109.47534 | -4109.89775 | -4110.40570 |





Table S17: The absolute energies in hartree of the potential energy curve of NbSi in the  $^2\Delta$  state with a SP-based wave function and nom-CPO active space.

| Distance | SP          | tpbe        | ftpbe       | trevpbe     | ftrevpbe    | tblyp       | ftblyp      | torelyp     | ftorelyp    |
|----------|-------------|-------------|-------------|-------------|-------------|-------------|-------------|-------------|-------------|
| 16.82    | -4106.26212 | -4108.35683 | -4108.81881 | -4108.65425 | -4109.12282 | -4109.02757 | -4109.47536 | -4109.89795 | -4110.40562 |
| 16.91    | -4106.26212 | -4108.35683 | -4108.81881 | -4108.65425 | -4109.12282 | -4109.02757 | -4109.47536 | -4109.89795 | -4110.40562 |
| 17.01    | -4106.26212 | -4108.35683 | -4108.81881 | -4108.65425 | -4109.12282 | -4109.02757 | -4109.47536 | -4109.89795 | -4110.40562 |
| 17.10    | -4106.26212 | -4108.35683 | -4108.81881 | -4108.65425 | -4109.12282 | -4109.02758 | -4109.47536 | -4109.89795 | -4110.40562 |
| 17.20    | -4106.26211 | -4108.35683 | -4108.81881 | -4108.65425 | -4109.12282 | -4109.02758 | -4109.47536 | -4109.89795 | -4110.40562 |
| 17.29    | -4106.26211 | -4108.35683 | -4108.81881 | -4108.65425 | -4109.12282 | -4109.02758 | -4109.47536 | -4109.89795 | -4110.40562 |
| 17.39    | -4106.26211 | -4108.35683 | -4108.81881 | -4108.65425 | -4109.12282 | -4109.02758 | -4109.47536 | -4109.89795 | -4110.40561 |
| 17.48    | -4106.26211 | -4108.35683 | -4108.81881 | -4108.65425 | -4109.12282 | -4109.02758 | -4109.47536 | -4109.89795 | -4110.40561 |
| 17.57    | -4106.26211 | -4108.35683 | -4108.81881 | -4108.65425 | -4109.12282 | -4109.02758 | -4109.47536 | -4109.89795 | -4110.40561 |
| 17.67    | -4106.26211 | -4108.35683 | -4108.81881 | -4108.65425 | -4109.12282 | -4109.02758 | -4109.47536 | -4109.89795 | -4110.40561 |
| 17.76    | -4106.26211 | -4108.35683 | -4108.81881 | -4108.65425 | -4109.12282 | -4109.02758 | -4109.47537 | -4109.89795 | -4110.40561 |
| 17.86    | -4106.26211 | -4108.35683 | -4108.81881 | -4108.65425 | -4109.12282 | -4109.02758 | -4109.47537 | -4109.89795 | -4110.40561 |
| 17.95    | -4106.26211 | -4108.35683 | -4108.81881 | -4108.65425 | -4109.12282 | -4109.02758 | -4109.47537 | -4109.89795 | -4110.40561 |
| 18.05    | -4106.26211 | -4108.35682 | -4108.81881 | -4108.65425 | -4109.12282 | -4109.02758 | -4109.47537 | -4109.89795 | -4110.40561 |

Table S18: The absolute energies in hartree of the potential energy curve of NbSi in the  $^2\Sigma^+$  state with a SP-based wave function and nom-CPO active space.

| Distance | SP          | tpbe        | ftpbe       | trevpbe     | ftrevpbe    | tblyp       | ftblyp      | torelyp     | ftorelyp    |
|----------|-------------|-------------|-------------|-------------|-------------|-------------|-------------|-------------|-------------|
| 1.98     | -4102.85155 | -4105.05240 | -4105.52423 | -4105.33477 | -4105.80698 | -4105.69499 | -4106.16714 | -4106.62993 | -4107.15085 |
| 2.08     | -4103.51960 | -4105.71319 | -4106.18451 | -4105.99663 | -4106.46831 | -4106.35744 | -4106.82907 | -4107.28650 | -4107.80689 |
| 2.17     | -4104.05516 | -4106.24210 | -4106.71296 | -4106.52662 | -4106.99780 | -4106.88778 | -4107.35890 | -4107.81157 | -4108.33137 |
| 2.27     | -4104.48288 | -4106.66428 | -4107.13475 | -4106.94985 | -4107.42060 | -4107.31111 | -4107.78176 | -4108.23046 | -4108.74953 |
| 2.36     | -4104.82401 | -4107.00132 | -4107.47155 | -4107.28792 | -4107.75840 | -4107.64887 | -4108.11913 | -4108.56998 | -4109.08528 |
| 2.46     | -4105.09693 | -4107.27061 | -4107.74092 | -4107.55815 | -4108.02871 | -4107.91830 | -4108.38834 | -4108.83914 | -4109.35359 |
| 2.55     | -4105.31838 | -4107.49030 | -4107.96192 | -4107.77865 | -4108.25091 | -4108.13773 | -4108.60832 | -4109.06291 | -4109.57695 |
| 2.65     | -4105.49792 | -4107.66413 | -4108.13529 | -4107.95348 | -4108.42526 | -4108.31204 | -4108.78207 | -4109.24225 | -4109.75597 |
| 2.74     | -4105.64377 | -4107.80536 | -4108.27618 | -4108.09564 | -4108.56705 | -4108.45387 | -4108.92356 | -4109.38673 | -4109.90024 |
| 2.83     | -4105.79800 | -4107.94505 | -4108.41390 | -4108.23435 | -4108.70322 | -4108.59523 | -4109.06350 | -4109.50393 | -4110.01737 |
| 2.93     | -4105.89671 | -4108.04143 | -4108.51030 | -4108.33152 | -4108.80044 | -4108.69213 | -4109.16041 | -4109.59976 | -4110.11325 |
| 3.02     | -4105.97725 | -4108.12078 | -4108.58970 | -4108.41161 | -4108.88063 | -4108.77200 | -4109.24030 | -4109.67870 | -4110.19224 |
| 3.12     | -4106.04300 | -4108.18639 | -4108.65526 | -4108.47792 | -4108.94692 | -4108.83812 | -4109.30632 | -4109.74404 | -4110.25753 |
| 3.21     | -4106.09699 | -4108.24182 | -4108.71042 | -4108.53410 | -4109.00290 | -4108.89377 | -4109.36161 | -4109.79971 | -4110.31291 |
| 3.31     | -4106.14610 | -4108.29025 | -4108.75956 | -4108.58347 | -4109.05348 | -4108.94146 | -4109.40892 | -4109.84765 | -4110.36184 |
| 3.40     | -4106.18489 | -4108.32714 | -4108.79562 | -4108.62097 | -4109.09014 | -4108.97875 | -4109.44545 | -4109.88470 | -4110.39793 |
| 3.50     | -4106.21662 | -4108.35683 | -4108.82476 | -4108.65116 | -4109.11983 | -4109.00883 | -4109.47489 | -4109.91422 | -4110.42676 |
| 3.59     | -4106.24225 | -4108.38040 | -4108.84786 | -4108.67519 | -4109.14344 | -4109.03285 | -4109.49830 | -4109.93756 | -4110.44947 |
| 3.68     | -4106.26272 | -4108.39892 | -4108.86599 | -4108.69413 | -4109.16206 | -4109.05186 | -4109.51678 | -4109.95583 | -4110.46722 |
| 3.78     | -4106.27886 | -4108.41335 | -4108.88015 | -4108.70896 | -4109.17669 | -4109.06683 | -4109.53132 | -4109.96995 | -4110.48098 |
| 3.87     | -4106.29141 | -4108.42446 | -4108.89112 | -4108.72043 | -4109.18810 | -4109.07856 | -4109.54273 | -4109.98067 | -4110.49150 |
| 3.97     | -4106.30100 | -4108.43288 | -4108.89953 | -4108.72914 | -4109.19692 | -4109.08769 | -4109.55163 | -4109.98855 | -4110.49942 |
| 4.06     | -4106.30811 | -4108.43907 | -4108.90580 | -4108.73555 | -4109.20354 | -4109.09466 | -4109.55842 | -4109.99405 | -4110.50513 |
| 4.16     | -4106.31315 | -4108.44333 | -4108.91018 | -4108.73994 | -4109.20821 | -4109.09976 | -4109.56336 | -4109.99747 | -4110.50888 |
| 4.35     | -4106.31645 | -4108.44588 | -4108.91286 | -4108.74255 | -4109.21112 | -4109.10321 | -4109.56662 | -4109.99899 | -4110.51078 |
| 4.44     | -4106.31835 | -4108.44688 | -4108.91400 | -4108.74347 | -4109.21240 | -4109.10519 | -4109.56839 | -4109.99854 | -4110.51080 |
| 4.54     | -4106.32393 | -4108.44480 | -4108.91147 | -4108.74070 | -4109.20958 | -4109.10418 | -4109.56640 | -4109.99217 | -4110.50395 |
| 4.63     | -4106.32392 | -4108.44275 | -4108.90954 | -4108.73859 | -4109.20781 | -4109.10285 | -4109.56484 | -4109.98897 | -4110.50098 |
| 4.72     | -4106.32315 | -4108.43987 | -4108.90684 | -4108.73564 | -4109.20528 | -4109.10062 | -4109.56243 | -4109.98495 | -4110.49729 |
| 4.82     | -4106.32181 | -4108.43629 | -4108.90348 | -4108.73200 | -4109.20213 | -4109.09765 | -4109.55928 | -4109.98029 | -4110.49303 |
| 4.91     | -4106.32004 | -4108.43220 | -4108.89964 | -4108.72786 | -4109.19851 | -4109.09408 | -4109.55558 | -4109.97516 | -4110.48836 |
| 5.01     | -4106.31797 | -4108.42771 | -4108.89541 | -4108.72333 | -4109.19453 | -4109.09006 | -4109.55144 | -4109.96972 | -4110.48342 |

Table S18: The absolute energies in hartree of the potential energy curve of NbSi in the  $^2\Sigma^+$  state with a SP-based wave function and nom-CPO active space.

| Distance | SP          | tpbe        | ftpbe       | trevpbe     | ftrevpbe    | tblyp       | ftblyp      | torelyp     | ftorelyp    |
|----------|-------------|-------------|-------------|-------------|-------------|-------------|-------------|-------------|-------------|
| 5.10     | -4106.31570 | -4108.42299 | -4108.89093 | -4108.71859 | -4109.19030 | -4109.08575 | -4109.54702 | -4109.96413 | -4110.47833 |
| 5.20     | -4106.31329 | -4108.41812 | -4108.88629 | -4108.71372 | -4109.18592 | -4109.08126 | -4109.54241 | -4109.95850 | -4110.47318 |
| 5.29     | -4106.31079 | -4108.41320 | -4108.88156 | -4108.70882 | -4109.18144 | -4109.07667 | -4109.53771 | -4109.95293 | -4110.46805 |
| 5.39     | -4106.30824 | -4108.40831 | -4108.87681 | -4108.70396 | -4109.17694 | -4109.07209 | -4109.53300 | -4109.94750 | -4110.46299 |
| 5.48     | -4106.30565 | -4108.40352 | -4108.87212 | -4108.69923 | -4109.17247 | -4109.06760 | -4109.52837 | -4109.94228 | -4110.45807 |
| 5.57     | -4106.30303 | -4108.39891 | -4108.86757 | -4108.69468 | -4109.16813 | -4109.06328 | -4109.52389 | -4109.93735 | -4110.45338 |
| 5.67     | -4106.30039 | -4108.39451 | -4108.86321 | -4108.69036 | -4109.16397 | -4109.05917 | -4109.51963 | -4109.93273 | -4110.44894 |
| 5.76     | -4106.29773 | -4108.39030 | -4108.85902 | -4108.68623 | -4109.15996 | -4109.05525 | -4109.51557 | -4109.92836 | -4110.44471 |
| 5.86     | -4106.29507 | -4108.38625 | -4108.85497 | -4108.68227 | -4109.15607 | -4109.05150 | -4109.51165 | -4109.92424 | -4110.44068 |
| 5.95     | -4106.29241 | -4108.38237 | -4108.85105 | -4108.67848 | -4109.15231 | -4109.04792 | -4109.50790 | -4109.92032 | -4110.43683 |
| 6.05     | -4106.28977 | -4108.37866 | -4108.84730 | -4108.67486 | -4109.14871 | -4109.04451 | -4109.50433 | -4109.91662 | -4110.43318 |
| 6.14     | -4106.28716 | -4108.37510 | -4108.84371 | -4108.67139 | -4109.14524 | -4109.04126 | -4109.50094 | -4109.91310 | -4110.42970 |
| 6.24     | -4106.28458 | -4108.37171 | -4108.84026 | -4108.66808 | -4109.14190 | -4109.03818 | -4109.49770 | -4109.90979 | -4110.42637 |
| 6.33     | -4106.28204 | -4108.36846 | -4108.83692 | -4108.66492 | -4109.13866 | -4109.03526 | -4109.49459 | -4109.90665 | -4110.42319 |
| 6.43     | -4106.27956 | -4108.36537 | -4108.83373 | -4108.66191 | -4109.13555 | -4109.03249 | -4109.49165 | -4109.90368 | -4110.42018 |
| 6.52     | -4106.27714 | -4108.36240 | -4108.83068 | -4108.65903 | -4109.13258 | -4109.02987 | -4109.48887 | -4109.90087 | -4110.41733 |
| 6.61     | -4106.27479 | -4108.35960 | -4108.82778 | -4108.65630 | -4109.12974 | -4109.02742 | -4109.48626 | -4109.89824 | -4110.41463 |
| 6.71     | -4106.27253 | -4108.35693 | -4108.82501 | -4108.65371 | -4109.12702 | -4109.02513 | -4109.48382 | -4109.89578 | -4110.41209 |
| 6.80     | -4106.27035 | -4108.35442 | -4108.82240 | -4108.65127 | -4109.12445 | -4109.02301 | -4109.48157 | -4109.89348 | -4110.40971 |
| 6.90     | -4106.26826 | -4108.35206 | -4108.81996 | -4108.64897 | -4109.12203 | -4109.02106 | -4109.47950 | -4109.89136 | -4110.40752 |
| 6.99     | -4106.26628 | -4108.34983 | -4108.81765 | -4108.64681 | -4109.11974 | -4109.01925 | -4109.47762 | -4109.88939 | -4110.40548 |
| 7.09     | -4106.26441 | -4108.34771 | -4108.81547 | -4108.64476 | -4109.11757 | -4109.01759 | -4109.47590 | -4109.88758 | -4110.40360 |
| 7.18     | -4106.26264 | -4108.34572 | -4108.81343 | -4108.64283 | -4109.11551 | -4109.01607 | -4109.47434 | -4109.88589 | -4110.40184 |
| 7.28     | -4106.26100 | -4108.34382 | -4108.81149 | -4108.64099 | -4109.11356 | -4109.01466 | -4109.47292 | -4109.88433 | -4110.40020 |
| 7.37     | -4106.25947 | -4108.34202 | -4108.80966 | -4108.63925 | -4109.11171 | -4109.01336 | -4109.47164 | -4109.88288 | -4110.39868 |
| 7.46     | -4106.25807 | -4108.34031 | -4108.80792 | -4108.63760 | -4109.10996 | -4109.01215 | -4109.47047 | -4109.88154 | -4110.39726 |
| 7.56     | -4106.25678 | -4108.33868 | -4108.80629 | -4108.63604 | -4109.10830 | -4109.01102 | -4109.46941 | -4109.88029 | -4110.39594 |
| 7.65     | -4106.25561 | -4108.33712 | -4108.80472 | -4108.63454 | -4109.10672 | -4109.00994 | -4109.46842 | -4109.87911 | -4110.39471 |
| 7.75     | -4106.25454 | -4108.33564 | -4108.80324 | -4108.63313 | -4109.10522 | -4109.00894 | -4109.46750 | -4109.87801 | -4110.39353 |
| 7.84     | -4106.25358 | -4108.33422 | -4108.80182 | -4108.63178 | -4109.10380 | -4109.00797 | -4109.46664 | -4109.87697 | -4110.39242 |
| 7.94     | -4106.25271 | -4108.33287 | -4108.80047 | -4108.63050 | -4109.10244 | -4109.00705 | -4109.46581 | -4109.87599 | -4110.39137 |
| 8.03     | -4106.25193 | -4108.33159 | -4108.79919 | -4108.62928 | -4109.10116 | -4109.00616 | -4109.46503 | -4109.87507 | -4110.39038 |
| 8.13     | -4106.25122 | -4108.33037 | -4108.79798 | -4108.62814 | -4109.09996 | -4109.00532 | -4109.46429 | -4109.87422 | -4110.38945 |
| 8.22     | -4106.25060 | -4108.32923 | -4108.79685 | -4108.62707 | -4109.09883 | -4109.00451 | -4109.46358 | -4109.87343 | -4110.38859 |
| 8.31     | -4106.25003 | -4108.32817 | -4108.79579 | -4108.62607 | -4109.09780 | -4109.00376 | -4109.46293 | -4109.87270 | -4110.38780 |
| 8.41     | -4106.24953 | -4108.32718 | -4108.79481 | -4108.62515 | -4109.09684 | -4109.00304 | -4109.46232 | -4109.87204 | -4110.38708 |
| 8.50     | -4106.24908 | -4108.32626 | -4108.79390 | -4108.62431 | -4109.09596 | -4109.00237 | -4109.46175 | -4109.87144 | -4110.38644 |
| 8.60     | -4106.24869 | -4108.32542 | -4108.79308 | -4108.62355 | -4109.09517 | -4109.00176 | -4109.46123 | -4109.87092 | -4110.38587 |
| 8.69     | -4106.24833 | -4108.32468 | -4108.79234 | -4108.62288 | -4109.09447 | -4109.00121 | -4109.46076 | -4109.87047 | -4110.38537 |
| 8.79     | -4106.24802 | -4108.32403 | -4108.79170 | -4108.62230 | -4109.09386 | -4109.00074 | -4109.46035 | -4109.87009 | -4110.38494 |
| 8.88     | -4106.24774 | -4108.32346 | -4108.79112 | -4108.62179 | -4109.09333 | -4109.00033 | -4109.45999 | -4109.86976 | -4110.38458 |
| 8.98     | -4106.24749 | -4108.32296 | -4108.79062 | -4108.62135 | -4109.09286 | -4108.99997 | -4109.45968 | -4109.86948 | -4110.38426 |
| 9.07     | -4106.24727 | -4108.32252 | -4108.79018 | -4108.62097 | -4109.09246 | -4108.99966 | -4109.45940 | -4109.86925 | -4110.38399 |
| 9.17     | -4106.24707 | -4108.32213 | -4108.78978 | -4108.62064 | -4109.09210 | -4108.99939 | -4109.45916 | -4109.86905 | -4110.38375 |
| 9.26     | -4106.24689 | -4108.32178 | -4108.78943 | -4108.62035 | -4109.09179 | -4108.99916 | -4109.45894 | -4109.86889 | -4110.38355 |
| 9.35     | -4106.24673 | -4108.32148 | -4108.78912 | -4108.62010 | -4109.09152 | -4108.99896 | -4109.45876 | -4109.86875 | -4110.38338 |
| 9.45     | -4106.24658 | -4108.32121 | -4108.78885 | -4108.61988 | -4109.09129 | -4108.99879 | -4109.45860 | -4109.86865 | -4110.38324 |
| 9.54     | -4106.24645 | -4108.32098 | -4108.78861 | -4108.61970 | -4109.09109 | -4108.99864 | -4109.45846 | -4109.86856 | -4110.38312 |
| 9.64     | -4106.24633 | -4108.32076 | -4108.78839 | -4108.61953 | -4109.09090 | -4108.99851 | -4109.45834 | -4109.86848 | -4110.38302 |
| 9.73     | -4106.24622 | -4108.32057 | -4108.78819 | -4108.61938 | -4109.09074 | -4108.99840 | -4109.45822 | -4109.86843 | -4110.38293 |
| 9.83     | -4106.24612 | -4108.32040 | -4108.78801 | -4108.61925 | -4109.09059 | -4108.99829 | -4109.45812 | -4109.86837 | -4110.38286 |
| 9.92     | -4106.24603 | -4108.32024 | -4108.78783 | -4108.61913 | -4109.09046 | -4108.99820 | -4109.45802 | -4109.86832 | -4110.38279 |

Table S18: The absolute energies in hartree of the potential energy curve of NbSi in the  $^2\Sigma^+$  state with a SP-based wave function and nom-CPO active space.

| Distance | SP          | tpbe        | ftpb        | trevpbe     | ftrevpbe    | tblyp       | ftblyp      | torelyp     | ftorelyp    |
|----------|-------------|-------------|-------------|-------------|-------------|-------------|-------------|-------------|-------------|
| 10.02    | -4106.24595 | -4108.32010 | -4108.78769 | -4108.61903 | -4109.09034 | -4108.99812 | -4109.45794 | -4109.86829 | -4110.38273 |
| 10.11    | -4106.24588 | -4108.31997 | -4108.78756 | -4108.61894 | -4109.09024 | -4108.99805 | -4109.45787 | -4109.86827 | -4110.38269 |
| 10.20    | -4106.24581 | -4108.31985 | -4108.78743 | -4108.61886 | -4109.09015 | -4108.99799 | -4109.45780 | -4109.86825 | -4110.38265 |
| 10.30    | -4106.24575 | -4108.31975 | -4108.78732 | -4108.61879 | -4109.09007 | -4108.99793 | -4109.45775 | -4109.86823 | -4110.38262 |
| 10.39    | -4106.24569 | -4108.31967 | -4108.78723 | -4108.61874 | -4109.09000 | -4108.99789 | -4109.45771 | -4109.86823 | -4110.38260 |
| 10.49    | -4106.24564 | -4108.31959 | -4108.78715 | -4108.61869 | -4109.08995 | -4108.99786 | -4109.45767 | -4109.86823 | -4110.38258 |
| 10.58    | -4106.24559 | -4108.31952 | -4108.78708 | -4108.61866 | -4109.08990 | -4108.99784 | -4109.45764 | -4109.86824 | -4110.38257 |
| 10.68    | -4106.24554 | -4108.31946 | -4108.78701 | -4108.61862 | -4109.08986 | -4108.99782 | -4109.45762 | -4109.86825 | -4110.38257 |
| 10.77    | -4106.24550 | -4108.31941 | -4108.78695 | -4108.61859 | -4109.08982 | -4108.99780 | -4109.45760 | -4109.86826 | -4110.38256 |
| 10.87    | -4106.24546 | -4108.31936 | -4108.78689 | -4108.61857 | -4109.08978 | -4108.99779 | -4109.45758 | -4109.86827 | -4110.38255 |
| 10.96    | -4106.24543 | -4108.31931 | -4108.78684 | -4108.61854 | -4109.08975 | -4108.99777 | -4109.45756 | -4109.86828 | -4110.38255 |
| 11.05    | -4106.24540 | -4108.31926 | -4108.78679 | -4108.61852 | -4109.08971 | -4108.99776 | -4109.45754 | -4109.86828 | -4110.38254 |
| 11.15    | -4106.24537 | -4108.31922 | -4108.78674 | -4108.61850 | -4109.08969 | -4108.99775 | -4109.45753 | -4109.86829 | -4110.38254 |
| 11.24    | -4106.24534 | -4108.31919 | -4108.78670 | -4108.61848 | -4109.08966 | -4108.99775 | -4109.45752 | -4109.86830 | -4110.38254 |
| 11.34    | -4106.24531 | -4108.31915 | -4108.78666 | -4108.61846 | -4109.08964 | -4108.99774 | -4109.45751 | -4109.86830 | -4110.38253 |
| 11.43    | -4106.24529 | -4108.31912 | -4108.78663 | -4108.61845 | -4109.08962 | -4108.99774 | -4109.45750 | -4109.86831 | -4110.38253 |
| 11.53    | -4106.24527 | -4108.31909 | -4108.78660 | -4108.61844 | -4109.08960 | -4108.99774 | -4109.45750 | -4109.86832 | -4110.38253 |
| 11.62    | -4106.24525 | -4108.31907 | -4108.78657 | -4108.61843 | -4109.08959 | -4108.99774 | -4109.45750 | -4109.86833 | -4110.38253 |
| 11.72    | -4106.24523 | -4108.31905 | -4108.78655 | -4108.61842 | -4109.08957 | -4108.99774 | -4109.45750 | -4109.86834 | -4110.38253 |
| 11.81    | -4106.24521 | -4108.31903 | -4108.78653 | -4108.61842 | -4109.08957 | -4108.99775 | -4109.45750 | -4109.86835 | -4110.38254 |
| 11.91    | -4106.24519 | -4108.31902 | -4108.78651 | -4108.61841 | -4109.08956 | -4108.99776 | -4109.45751 | -4109.86836 | -4110.38254 |
| 12.00    | -4106.24518 | -4108.31900 | -4108.78649 | -4108.61841 | -4109.08955 | -4108.99776 | -4109.45751 | -4109.86837 | -4110.38254 |
| 12.09    | -4106.24516 | -4108.31899 | -4108.78648 | -4108.61841 | -4109.08954 | -4108.99777 | -4109.45752 | -4109.86838 | -4110.38255 |
| 12.19    | -4106.24515 | -4108.31898 | -4108.78646 | -4108.61840 | -4109.08954 | -4108.99778 | -4109.45752 | -4109.86839 | -4110.38255 |
| 12.28    | -4106.24513 | -4108.31896 | -4108.78645 | -4108.61840 | -4109.08953 | -4108.99778 | -4109.45753 | -4109.86840 | -4110.38255 |
| 12.38    | -4106.24512 | -4108.31895 | -4108.78643 | -4108.61840 | -4109.08952 | -4108.99779 | -4109.45753 | -4109.86840 | -4110.38254 |
| 12.47    | -4106.24511 | -4108.31894 | -4108.78641 | -4108.61839 | -4109.08951 | -4108.99779 | -4109.45753 | -4109.86840 | -4110.38254 |
| 12.57    | -4106.24510 | -4108.31893 | -4108.78640 | -4108.61839 | -4109.08950 | -4108.99780 | -4109.45753 | -4109.86841 | -4110.38254 |
| 12.66    | -4106.24509 | -4108.31892 | -4108.78639 | -4108.61838 | -4109.08949 | -4108.99780 | -4109.45753 | -4109.86841 | -4110.38253 |
| 12.76    | -4106.24508 | -4108.31891 | -4108.78637 | -4108.61838 | -4109.08948 | -4108.99781 | -4109.45754 | -4109.86841 | -4110.38253 |
| 12.85    | -4106.24507 | -4108.31890 | -4108.78636 | -4108.61837 | -4109.08948 | -4108.99781 | -4109.45754 | -4109.86841 | -4110.38253 |
| 12.94    | -4106.24506 | -4108.31889 | -4108.78636 | -4108.61837 | -4109.08948 | -4108.99782 | -4109.45755 | -4109.86841 | -4110.38253 |
| 13.04    | -4106.24506 | -4108.31888 | -4108.78635 | -4108.61837 | -4109.08947 | -4108.99783 | -4109.45755 | -4109.86842 | -4110.38253 |
| 13.13    | -4106.24505 | -4108.31888 | -4108.78634 | -4108.61837 | -4109.08947 | -4108.99783 | -4109.45756 | -4109.86842 | -4110.38253 |
| 13.23    | -4106.24504 | -4108.31887 | -4108.78634 | -4108.61837 | -4109.08947 | -4108.99784 | -4109.45757 | -4109.86842 | -4110.38253 |
| 13.32    | -4106.24503 | -4108.31887 | -4108.78634 | -4108.61837 | -4109.08947 | -4108.99785 | -4109.45758 | -4109.86843 | -4110.38253 |
| 13.42    | -4106.24503 | -4108.31887 | -4108.78633 | -4108.61837 | -4109.08947 | -4108.99786 | -4109.45758 | -4109.86843 | -4110.38254 |
| 13.51    | -4106.24502 | -4108.31886 | -4108.78633 | -4108.61837 | -4109.08947 | -4108.99787 | -4109.45759 | -4109.86844 | -4110.38254 |
| 13.61    | -4106.24502 | -4108.31886 | -4108.78632 | -4108.61837 | -4109.08947 | -4108.99788 | -4109.45760 | -4109.86844 | -4110.38254 |
| 13.70    | -4106.24501 | -4108.31886 | -4108.78632 | -4108.61837 | -4109.08946 | -4108.99788 | -4109.45760 | -4109.86844 | -4110.38254 |
| 13.80    | -4106.24500 | -4108.31886 | -4108.78632 | -4108.61837 | -4109.08946 | -4108.99789 | -4109.45761 | -4109.86844 | -4110.38253 |
| 13.89    | -4106.24500 | -4108.31885 | -4108.78631 | -4108.61837 | -4109.08946 | -4108.99789 | -4109.45761 | -4109.86844 | -4110.38253 |
| 13.98    | -4106.24499 | -4108.31885 | -4108.78631 | -4108.61836 | -4109.08945 | -4108.99790 | -4109.45761 | -4109.86844 | -4110.38253 |
| 14.08    | -4106.24499 | -4108.31884 | -4108.78630 | -4108.61836 | -4109.08945 | -4108.99790 | -4109.45762 | -4109.86844 | -4110.38253 |
| 14.17    | -4106.24499 | -4108.31884 | -4108.78630 | -4108.61836 | -4109.08945 | -4108.99790 | -4109.45762 | -4109.86844 | -4110.38253 |
| 14.27    | -4106.24498 | -4108.31884 | -4108.78629 | -4108.61836 | -4109.08944 | -4108.99791 | -4109.45762 | -4109.86844 | -4110.38252 |
| 14.36    | -4106.24498 | -4108.31883 | -4108.78629 | -4108.61836 | -4109.08944 | -4108.99791 | -4109.45763 | -4109.86844 | -4110.38252 |
| 14.46    | -4106.24497 | -4108.31883 | -4108.78629 | -4108.61836 | -4109.08944 | -4108.99792 | -4109.45763 | -4109.86844 | -4110.38252 |
| 14.55    | -4106.24497 | -4108.31883 | -4108.78629 | -4108.61835 | -4109.08944 | -4108.99792 | -4109.45763 | -4109.86844 | -4110.38252 |
| 14.65    | -4106.24497 | -4108.31883 | -4108.78628 | -4108.61835 | -4109.08944 | -4108.99792 | -4109.45764 | -4109.86844 | -4110.38252 |
| 14.74    | -4106.24496 | -4108.31882 | -4108.78628 | -4108.61835 | -4109.08944 | -4108.99793 | -4109.45764 | -4109.86844 | -4110.38252 |
| 14.83    | -4106.24496 | -4108.31882 | -4108.78628 | -4108.61835 | -4109.08944 | -4108.99793 | -4109.45765 | -4109.86844 | -4110.38252 |

Table S18: The absolute energies in hartree of the potential energy curve of NbSi in the  $^2\Sigma^+$  state with a SP-based wave function and nom-CPO active space.

| Distance | SP          | tpbe        | ftpbe       | trevpbe     | ftrevpbe    | tblyp       | ftblyp      | torelyp     | ftorelyp    |
|----------|-------------|-------------|-------------|-------------|-------------|-------------|-------------|-------------|-------------|
| 14.93    | -4106.24496 | -4108.31882 | -4108.78628 | -4108.61835 | -4109.08944 | -4108.99794 | -4109.45765 | -4109.86844 | -4110.38252 |
| 15.02    | -4106.24495 | -4108.31882 | -4108.78628 | -4108.61835 | -4109.08944 | -4108.99794 | -4109.45766 | -4109.86844 | -4110.38252 |
| 15.12    | -4106.24495 | -4108.31882 | -4108.78628 | -4108.61835 | -4109.08944 | -4108.99795 | -4109.45766 | -4109.86844 | -4110.38252 |
| 15.21    | -4106.24495 | -4108.31882 | -4108.78628 | -4108.61835 | -4109.08944 | -4108.99795 | -4109.45766 | -4109.86844 | -4110.38252 |
| 15.31    | -4106.24495 | -4108.31882 | -4108.78628 | -4108.61836 | -4109.08944 | -4108.99796 | -4109.45767 | -4109.86845 | -4110.38252 |
| 15.40    | -4106.24494 | -4108.31882 | -4108.78628 | -4108.61836 | -4109.08944 | -4108.99796 | -4109.45767 | -4109.86845 | -4110.38252 |
| 15.50    | -4106.24494 | -4108.31882 | -4108.78628 | -4108.61836 | -4109.08944 | -4108.99796 | -4109.45767 | -4109.86845 | -4110.38252 |
| 15.59    | -4106.24494 | -4108.31882 | -4108.78628 | -4108.61836 | -4109.08943 | -4108.99797 | -4109.45768 | -4109.86845 | -4110.38252 |
| 15.68    | -4106.24494 | -4108.31882 | -4108.78628 | -4108.61835 | -4109.08943 | -4108.99797 | -4109.45768 | -4109.86845 | -4110.38252 |
| 15.78    | -4106.24494 | -4108.31882 | -4108.78628 | -4108.61835 | -4109.08943 | -4108.99797 | -4109.45768 | -4109.86845 | -4110.38252 |
| 15.87    | -4106.24493 | -4108.31882 | -4108.78627 | -4108.61835 | -4109.08943 | -4108.99797 | -4109.45768 | -4109.86844 | -4110.38252 |
| 15.97    | -4106.24493 | -4108.31882 | -4108.78627 | -4108.61835 | -4109.08943 | -4108.99797 | -4109.45769 | -4109.86844 | -4110.38252 |
| 16.06    | -4106.24493 | -4108.31882 | -4108.78627 | -4108.61835 | -4109.08943 | -4108.99798 | -4109.45769 | -4109.86844 | -4110.38251 |
| 16.16    | -4106.24493 | -4108.31882 | -4108.78627 | -4108.61835 | -4109.08943 | -4108.99798 | -4109.45769 | -4109.86844 | -4110.38251 |
| 16.25    | -4106.24493 | -4108.31881 | -4108.78627 | -4108.61835 | -4109.08943 | -4108.99798 | -4109.45769 | -4109.86844 | -4110.38251 |
| 16.35    | -4106.24492 | -4108.31881 | -4108.78627 | -4108.61835 | -4109.08943 | -4108.99798 | -4109.45769 | -4109.86844 | -4110.38251 |
| 16.44    | -4106.24492 | -4108.31881 | -4108.78627 | -4108.61835 | -4109.08943 | -4108.99798 | -4109.45769 | -4109.86844 | -4110.38251 |
| 16.54    | -4106.24492 | -4108.31881 | -4108.78627 | -4108.61835 | -4109.08942 | -4108.99798 | -4109.45769 | -4109.86844 | -4110.38251 |
| 16.63    | -4106.24492 | -4108.31881 | -4108.78627 | -4108.61835 | -4109.08942 | -4108.99798 | -4109.45769 | -4109.86844 | -4110.38251 |
| 16.72    | -4106.24492 | -4108.31881 | -4108.78627 | -4108.61835 | -4109.08942 | -4108.99799 | -4109.45770 | -4109.86844 | -4110.38251 |
| 16.82    | -4106.24492 | -4108.31881 | -4108.78627 | -4108.61834 | -4109.08942 | -4108.99799 | -4109.45770 | -4109.86844 | -4110.38251 |
| 16.91    | -4106.24492 | -4108.31881 | -4108.78627 | -4108.61835 | -4109.08942 | -4108.99799 | -4109.45770 | -4109.86844 | -4110.38251 |
| 17.01    | -4106.24491 | -4108.31881 | -4108.78627 | -4108.61835 | -4109.08942 | -4108.99799 | -4109.45770 | -4109.86844 | -4110.38251 |
| 17.10    | -4106.24491 | -4108.31881 | -4108.78627 | -4108.61835 | -4109.08942 | -4108.99799 | -4109.45770 | -4109.86844 | -4110.38251 |
| 17.20    | -4106.24491 | -4108.31881 | -4108.78627 | -4108.61835 | -4109.08942 | -4108.99799 | -4109.45770 | -4109.86844 | -4110.38251 |
| 17.29    | -4106.24491 | -4108.31881 | -4108.78627 | -4108.61835 | -4109.08942 | -4108.99800 | -4109.45771 | -4109.86844 | -4110.38251 |
| 17.39    | -4106.24491 | -4108.31881 | -4108.78627 | -4108.61835 | -4109.08942 | -4108.99800 | -4109.45771 | -4109.86844 | -4110.38251 |
| 17.48    | -4106.24491 | -4108.31881 | -4108.78627 | -4108.61835 | -4109.08942 | -4108.99800 | -4109.45771 | -4109.86844 | -4110.38251 |
| 17.57    | -4106.24491 | -4108.31881 | -4108.78627 | -4108.61835 | -4109.08942 | -4108.99800 | -4109.45771 | -4109.86844 | -4110.38251 |
| 17.67    | -4106.24491 | -4108.31881 | -4108.78627 | -4108.61835 | -4109.08942 | -4108.99800 | -4109.45771 | -4109.86844 | -4110.38251 |
| 17.76    | -4106.24491 | -4108.31881 | -4108.78627 | -4108.61835 | -4109.08942 | -4108.99800 | -4109.45771 | -4109.86844 | -4110.38251 |
| 17.86    | -4106.24491 | -4108.31881 | -4108.78627 | -4108.61835 | -4109.08942 | -4108.99800 | -4109.45771 | -4109.86844 | -4110.38251 |
| 17.95    | -4106.24490 | -4108.31881 | -4108.78627 | -4108.61834 | -4109.08942 | -4108.99800 | -4109.45771 | -4109.86844 | -4110.38251 |
| 18.05    | -4106.24490 | -4108.31881 | -4108.78627 | -4108.61834 | -4109.08942 | -4108.99800 | -4109.45771 | -4109.86844 | -4110.38251 |

Table S19: The absolute energies in hartree of the potential energy curve of NbSi in the  $^6\Sigma^+$  state with a SP-based wave function and nom-CPO active space.

| Distance | SP          | tpbe        | ftpbe       | trevpbe     | ftrevpbe    | tblyp       | ftblyp      | torelyp     | ftorelyp    |
|----------|-------------|-------------|-------------|-------------|-------------|-------------|-------------|-------------|-------------|
| 1.98     | -4102.63312 | -4104.86329 | -4105.33759 | -4105.14365 | -4105.61946 | -4105.50086 | -4105.97655 | -4106.43674 | -4106.95773 |
| 2.08     | -4103.26727 | -4105.49175 | -4105.96620 | -4105.77329 | -4106.24922 | -4106.13232 | -4106.60679 | -4107.06170 | -4107.58243 |
| 2.17     | -4103.77686 | -4105.99625 | -4106.47088 | -4106.27907 | -4106.75505 | -4106.63878 | -4107.11278 | -4107.56356 | -4108.08381 |
| 2.27     | -4104.18958 | -4106.39972 | -4106.87013 | -4106.68398 | -4107.15487 | -4107.04409 | -4107.51362 | -4107.96616 | -4108.48113 |
| 2.36     | -4104.53227 | -4106.72900 | -4107.20211 | -4107.01438 | -4107.48842 | -4107.37561 | -4107.84689 | -4108.29331 | -4108.81116 |
| 2.46     | -4104.81427 | -4107.00192 | -4107.47469 | -4107.28827 | -4107.76190 | -4107.64997 | -4108.12109 | -4108.56415 | -4109.08142 |
| 2.55     | -4105.04368 | -4107.22310 | -4107.69561 | -4107.51031 | -4107.98370 | -4107.87276 | -4108.34374 | -4108.78330 | -4109.30033 |
| 2.65     | -4105.24865 | -4107.39537 | -4107.87195 | -4107.68276 | -4108.16163 | -4108.04901 | -4108.52435 | -4108.94801 | -4109.47288 |
| 2.74     | -4105.41314 | -4107.55493 | -4108.03285 | -4107.84309 | -4108.32354 | -4108.20914 | -4108.68573 | -4109.10634 | -4109.63287 |
| 2.83     | -4105.55044 | -4107.68873 | -4108.16721 | -4107.97759 | -4108.45869 | -4108.34362 | -4108.82079 | -4109.23910 | -4109.76626 |
| 2.93     | -4105.66983 | -4107.80245 | -4108.28222 | -4108.09195 | -4108.57478 | -4108.45730 | -4108.93526 | -4109.35112 | -4109.88037 |
| 3.02     | -4105.76696 | -4107.89855 | -4108.37805 | -4108.18863 | -4108.67111 | -4108.55422 | -4109.03200 | -4109.44646 | -4109.97527 |

Table S19: The absolute energies in hartree of the potential energy curve of NbSi in the  ${}^6\Sigma^+$  state with a SP-based wave function and nom-CPO active space.

| Distance | SP          | tpbe        | ftpb        | trevpbe     | ftrevpbe    | tblyp       | ftblyp      | torelyp     | ftorelyp    |
|----------|-------------|-------------|-------------|-------------|-------------|-------------|-------------|-------------|-------------|
| 3.12     | -4105.84873 | -4107.98025 | -4108.45935 | -4108.27088 | -4108.75285 | -4108.63675 | -4109.11422 | -4109.52751 | -4110.05573 |
| 3.21     | -4105.91771 | -4108.04988 | -4108.52845 | -4108.34102 | -4108.82236 | -4108.70720 | -4109.18422 | -4109.59655 | -4110.12413 |
| 3.31     | -4105.97600 | -4108.10935 | -4108.58724 | -4108.40097 | -4108.88153 | -4108.76749 | -4109.24393 | -4109.65553 | -4110.18234 |
| 3.40     | -4106.02535 | -4108.16027 | -4108.63725 | -4108.45235 | -4108.93188 | -4108.81923 | -4109.29488 | -4109.70610 | -4110.23187 |
| 3.50     | -4106.06727 | -4108.20412 | -4108.67960 | -4108.49665 | -4108.97439 | -4108.86398 | -4109.33827 | -4109.74990 | -4110.27381 |
| 3.59     | -4106.11388 | -4108.24236 | -4108.71467 | -4108.53515 | -4109.00940 | -4108.90319 | -4109.37428 | -4109.78862 | -4110.30836 |
| 3.68     | -4106.14613 | -4108.27215 | -4108.74437 | -4108.56530 | -4109.03951 | -4108.93347 | -4109.40438 | -4109.81785 | -4110.33755 |
| 3.78     | -4106.17298 | -4108.29679 | -4108.76894 | -4108.59030 | -4109.06448 | -4108.95860 | -4109.42937 | -4109.84198 | -4110.36170 |
| 3.87     | -4106.19515 | -4108.31696 | -4108.78896 | -4108.61079 | -4109.08487 | -4108.97925 | -4109.44979 | -4109.86167 | -4110.38130 |
| 3.97     | -4106.21325 | -4108.33324 | -4108.80507 | -4108.62739 | -4109.10129 | -4108.99602 | -4109.46628 | -4109.87751 | -4110.39697 |
| 4.06     | -4106.22784 | -4108.34622 | -4108.81794 | -4108.64065 | -4109.11450 | -4109.00944 | -4109.47953 | -4109.89007 | -4110.40951 |
| 4.16     | -4106.23943 | -4108.35636 | -4108.82802 | -4108.65107 | -4109.12491 | -4109.02005 | -4109.49001 | -4109.89982 | -4110.41933 |
| 4.35     | -4106.24843 | -4108.36407 | -4108.83564 | -4108.65903 | -4109.13283 | -4109.02817 | -4109.49800 | -4109.90714 | -4110.42667 |
| 4.44     | -4106.25523 | -4108.36962 | -4108.84107 | -4108.66482 | -4109.13853 | -4109.03414 | -4109.50374 | -4109.91231 | -4110.43177 |
| 4.54     | -4106.26017 | -4108.37336 | -4108.84466 | -4108.66878 | -4109.14238 | -4109.03826 | -4109.50762 | -4109.91567 | -4110.43504 |
| 4.63     | -4106.26357 | -4108.37560 | -4108.84678 | -4108.67124 | -4109.14475 | -4109.04088 | -4109.51002 | -4109.91761 | -4110.43694 |
| 4.72     | -4106.26568 | -4108.37671 | -4108.84772 | -4108.67256 | -4109.14592 | -4109.04237 | -4109.51129 | -4109.91855 | -4110.43775 |
| 4.82     | -4106.26670 | -4108.37682 | -4108.84765 | -4108.67288 | -4109.14606 | -4109.04288 | -4109.51155 | -4109.91854 | -4110.43756 |
| 4.91     | -4106.26682 | -4108.37605 | -4108.84673 | -4108.67230 | -4109.14534 | -4109.04248 | -4109.51091 | -4109.91762 | -4110.43649 |
| 5.01     | -4106.26619 | -4108.37455 | -4108.84510 | -4108.67097 | -4109.14391 | -4109.04133 | -4109.50955 | -4109.91594 | -4110.43469 |
| 5.10     | -4106.26494 | -4108.37245 | -4108.84291 | -4108.66904 | -4109.14191 | -4109.03957 | -4109.50760 | -4109.91366 | -4110.43233 |
| 5.20     | -4106.26319 | -4108.36987 | -4108.84025 | -4108.66662 | -4109.13946 | -4109.03732 | -4109.50518 | -4109.91091 | -4110.42953 |
| 5.29     | -4106.26106 | -4108.36686 | -4108.83720 | -4108.66377 | -4109.13661 | -4109.03462 | -4109.50232 | -4109.90772 | -4110.42633 |
| 5.39     | -4106.25864 | -4108.36349 | -4108.83378 | -4108.66056 | -4109.13340 | -4109.03154 | -4109.49909 | -4109.90418 | -4110.42277 |
| 5.48     | -4106.25599 | -4108.35981 | -4108.83005 | -4108.65703 | -4109.12986 | -4109.02815 | -4109.49552 | -4109.90033 | -4110.41888 |
| 5.57     | -4106.25319 | -4108.35583 | -4108.82603 | -4108.65319 | -4109.12603 | -4109.02443 | -4109.49163 | -4109.89617 | -4110.41469 |
| 5.67     | -4106.25030 | -4108.35153 | -4108.82171 | -4108.64905 | -4109.12190 | -4109.02038 | -4109.48741 | -4109.89170 | -4110.41020 |
| 5.76     | -4106.24737 | -4108.34682 | -4108.81698 | -4108.64448 | -4109.11738 | -4109.01589 | -4109.48276 | -4109.88679 | -4110.40531 |
| 5.86     | -4106.24445 | -4108.34158 | -4108.81174 | -4108.63940 | -4109.11236 | -4109.01085 | -4109.47755 | -4109.88136 | -4110.39990 |
| 5.95     | -4106.24158 | -4108.33608 | -4108.80622 | -4108.63407 | -4109.10705 | -4109.00554 | -4109.47207 | -4109.87570 | -4110.39427 |
| 6.05     | -4106.23876 | -4108.33092 | -4108.80102 | -4108.62904 | -4109.10204 | -4109.00058 | -4109.46695 | -4109.87045 | -4110.38902 |
| 6.14     | -4106.23599 | -4108.32626 | -4108.79632 | -4108.62452 | -4109.09750 | -4108.99615 | -4109.46237 | -4109.86577 | -4110.38433 |
| 6.24     | -4106.23326 | -4108.32204 | -4108.79205 | -4108.62042 | -4109.09337 | -4108.99218 | -4109.45827 | -4109.86156 | -4110.38011 |
| 6.33     | -4106.23059 | -4108.31817 | -4108.78813 | -4108.61666 | -4109.08958 | -4108.98858 | -4109.45455 | -4109.85773 | -4110.37628 |
| 6.43     | -4106.22796 | -4108.31459 | -4108.78450 | -4108.61318 | -4109.08606 | -4108.98529 | -4109.45115 | -4109.85422 | -4110.37275 |
| 6.52     | -4106.22540 | -4108.31126 | -4108.78111 | -4108.60994 | -4109.08278 | -4108.98226 | -4109.44801 | -4109.85096 | -4110.36947 |
| 6.61     | -4106.22290 | -4108.30815 | -4108.77796 | -4108.60691 | -4109.07970 | -4108.97946 | -4109.44512 | -4109.84794 | -4110.36642 |
| 6.71     | -4106.22047 | -4108.30524 | -4108.77500 | -4108.60408 | -4109.07682 | -4108.97689 | -4109.44245 | -4109.84514 | -4110.36359 |
| 6.80     | -4106.21812 | -4108.30255 | -4108.77226 | -4108.60145 | -4109.07415 | -4108.97454 | -4109.44002 | -4109.84255 | -4110.36099 |
| 6.90     | -4106.21586 | -4108.30004 | -4108.76972 | -4108.59901 | -4109.07166 | -4108.97238 | -4109.43780 | -4109.84016 | -4110.35859 |
| 6.99     | -4106.21369 | -4108.29771 | -4108.76737 | -4108.59674 | -4109.06936 | -4108.97042 | -4109.43580 | -4109.83797 | -4110.35639 |
| 7.09     | -4106.21161 | -4108.29555 | -4108.76518 | -4108.59464 | -4109.06722 | -4108.96864 | -4109.43398 | -4109.83595 | -4110.35436 |
| 7.18     | -4106.20964 | -4108.29355 | -4108.76316 | -4108.59269 | -4109.06524 | -4108.96703 | -4109.43234 | -4109.83410 | -4110.35250 |
| 7.28     | -4106.20778 | -4108.29169 | -4108.76129 | -4108.59087 | -4109.06340 | -4108.96557 | -4109.43087 | -4109.83240 | -4110.35080 |
| 7.37     | -4106.20603 | -4108.28997 | -4108.75956 | -4108.58920 | -4109.06170 | -4108.96427 | -4109.42956 | -4109.83086 | -4110.34924 |
| 7.46     | -4106.20440 | -4108.28838 | -4108.75798 | -4108.58766 | -4109.06014 | -4108.96311 | -4109.42841 | -4109.82947 | -4110.34785 |
| 7.56     | -4106.20290 | -4108.28690 | -4108.75650 | -4108.58623 | -4109.05869 | -4108.96207 | -4109.42739 | -4109.82820 | -4110.34657 |
| 7.65     | -4106.20153 | -4108.28550 | -4108.75511 | -4108.58487 | -4109.05732 | -4108.96113 | -4109.42647 | -4109.82702 | -4110.34539 |
| 7.75     | -4106.20030 | -4108.28411 | -4108.75374 | -4108.58353 | -4109.05598 | -4108.96020 | -4109.42561 | -4109.82588 | -4110.34426 |
| 7.84     | -4106.19922 | -4108.28267 | -4108.75232 | -4108.58214 | -4109.05460 | -4108.95924 | -4109.42471 | -4109.82472 | -4110.34311 |
| 7.94     | -4106.19829 | -4108.28116 | -4108.75085 | -4108.58069 | -4109.05315 | -4108.95820 | -4109.42375 | -4109.82350 | -4110.34192 |
| 8.03     | -4106.19749 | -4108.27965 | -4108.74937 | -4108.57924 | -4109.05171 | -4108.95711 | -4109.42276 | -4109.82229 | -4110.34074 |

Table S19: The absolute energies in hartree of the potential energy curve of NbSi in the  ${}^6\Sigma^+$  state with a SP-based wave function and nom-CPO active space.

| Distance | SP          | tpbe        | ftpb        | trevpbe     | ftrevpbe    | tblyp       | ftblyp      | torelyp     | ftorelyp    |
|----------|-------------|-------------|-------------|-------------|-------------|-------------|-------------|-------------|-------------|
| 8.13     | -4106.19680 | -4108.27820 | -4108.74795 | -4108.57785 | -4109.05033 | -4108.95604 | -4109.42178 | -4109.82114 | -4110.33961 |
| 8.22     | -4106.19622 | -4108.27690 | -4108.74668 | -4108.57661 | -4109.04910 | -4108.95506 | -4109.42089 | -4109.82012 | -4110.33862 |
| 8.31     | -4106.19571 | -4108.27577 | -4108.74558 | -4108.57555 | -4109.04805 | -4108.95421 | -4109.42011 | -4109.81927 | -4110.33777 |
| 8.41     | -4106.19527 | -4108.27481 | -4108.74464 | -4108.57464 | -4109.04714 | -4108.95349 | -4109.41945 | -4109.81855 | -4110.33706 |
| 8.50     | -4106.19487 | -4108.27397 | -4108.74381 | -4108.57386 | -4109.04636 | -4108.95287 | -4109.41887 | -4109.81794 | -4110.33644 |
| 8.60     | -4106.19453 | -4108.27323 | -4108.74308 | -4108.57318 | -4109.04568 | -4108.95233 | -4109.41836 | -4109.81742 | -4110.33592 |
| 8.69     | -4106.19421 | -4108.27258 | -4108.74244 | -4108.57259 | -4109.04508 | -4108.95185 | -4109.41792 | -4109.81698 | -4110.33546 |
| 8.79     | -4106.19394 | -4108.27200 | -4108.74187 | -4108.57206 | -4109.04455 | -4108.95143 | -4109.41753 | -4109.81659 | -4110.33507 |
| 8.88     | -4106.19369 | -4108.27148 | -4108.74136 | -4108.57160 | -4109.04408 | -4108.95106 | -4109.41717 | -4109.81627 | -4110.33473 |
| 8.98     | -4106.19346 | -4108.27102 | -4108.74090 | -4108.57119 | -4109.04367 | -4108.95073 | -4109.41686 | -4109.81598 | -4110.33443 |
| 9.07     | -4106.19326 | -4108.27060 | -4108.74049 | -4108.57083 | -4109.04330 | -4108.95043 | -4109.41659 | -4109.81574 | -4110.33418 |
| 9.17     | -4106.19307 | -4108.27023 | -4108.74012 | -4108.57051 | -4109.04297 | -4108.95017 | -4109.41634 | -4109.81554 | -4110.33396 |
| 9.26     | -4106.19291 | -4108.26990 | -4108.73979 | -4108.57023 | -4109.04268 | -4108.94995 | -4109.41612 | -4109.81537 | -4110.33377 |
| 9.35     | -4106.19276 | -4108.26960 | -4108.73948 | -4108.56997 | -4109.04242 | -4108.94974 | -4109.41592 | -4109.81522 | -4110.33361 |
| 9.45     | -4106.19262 | -4108.26933 | -4108.73921 | -4108.56975 | -4109.04219 | -4108.94956 | -4109.41574 | -4109.81510 | -4110.33347 |
| 9.54     | -4106.19249 | -4108.26909 | -4108.73897 | -4108.56955 | -4109.04199 | -4108.94940 | -4109.41559 | -4109.81500 | -4110.33335 |
| 9.64     | -4106.19238 | -4108.26888 | -4108.73876 | -4108.56939 | -4109.04181 | -4108.94926 | -4109.41545 | -4109.81491 | -4110.33325 |
| 9.73     | -4106.19227 | -4108.26868 | -4108.73855 | -4108.56923 | -4109.04164 | -4108.94914 | -4109.41533 | -4109.81484 | -4110.33316 |
| 9.83     | -4106.19217 | -4108.26851 | -4108.73838 | -4108.56909 | -4109.04150 | -4108.94903 | -4109.41522 | -4109.81478 | -4110.33309 |
| 9.92     | -4106.19209 | -4108.26835 | -4108.73822 | -4108.56898 | -4109.04137 | -4108.94893 | -4109.41512 | -4109.81474 | -4110.33303 |
| 10.02    | -4106.19200 | -4108.26821 | -4108.73807 | -4108.56887 | -4109.04126 | -4108.94885 | -4109.41504 | -4109.81470 | -4110.33299 |
| 10.11    | -4106.19193 | -4108.26808 | -4108.73794 | -4108.56878 | -4109.04116 | -4108.94877 | -4109.41496 | -4109.81467 | -4110.33295 |
| 10.20    | -4106.19186 | -4108.26796 | -4108.73782 | -4108.56869 | -4109.04107 | -4108.94871 | -4109.41489 | -4109.81465 | -4110.33291 |
| 10.30    | -4106.19180 | -4108.26786 | -4108.73771 | -4108.56862 | -4109.04099 | -4108.94865 | -4109.41483 | -4109.81463 | -4110.33288 |
| 10.39    | -4106.19174 | -4108.26776 | -4108.73761 | -4108.56856 | -4109.04092 | -4108.94860 | -4109.41478 | -4109.81462 | -4110.33286 |
| 10.49    | -4106.19169 | -4108.26768 | -4108.73752 | -4108.56850 | -4109.04085 | -4108.94856 | -4109.41473 | -4109.81462 | -4110.33283 |
| 10.58    | -4106.19164 | -4108.26760 | -4108.73744 | -4108.56845 | -4109.04080 | -4108.94852 | -4109.41469 | -4109.81461 | -4110.33282 |
| 10.68    | -4106.19159 | -4108.26753 | -4108.73737 | -4108.56841 | -4109.04075 | -4108.94849 | -4109.41466 | -4109.81462 | -4110.33280 |
| 10.77    | -4106.19155 | -4108.26747 | -4108.73730 | -4108.56837 | -4109.04070 | -4108.94847 | -4109.41463 | -4109.81462 | -4110.33279 |
| 10.87    | -4106.19151 | -4108.26741 | -4108.73723 | -4108.56834 | -4109.04066 | -4108.94845 | -4109.41460 | -4109.81462 | -4110.33278 |
| 10.96    | -4106.19147 | -4108.26736 | -4108.73718 | -4108.56831 | -4109.04062 | -4108.94843 | -4109.41458 | -4109.81462 | -4110.33278 |
| 11.05    | -4106.19143 | -4108.26731 | -4108.73712 | -4108.56828 | -4109.04058 | -4108.94841 | -4109.41456 | -4109.81463 | -4110.33277 |
| 11.15    | -4106.19140 | -4108.26727 | -4108.73708 | -4108.56826 | -4109.04055 | -4108.94840 | -4109.41454 | -4109.81463 | -4110.33277 |
| 11.24    | -4106.19137 | -4108.26723 | -4108.73703 | -4108.56824 | -4109.04053 | -4108.94839 | -4109.41453 | -4109.81464 | -4110.33276 |
| 11.34    | -4106.19134 | -4108.26719 | -4108.73699 | -4108.56822 | -4109.04050 | -4108.94838 | -4109.41451 | -4109.81464 | -4110.33276 |
| 11.43    | -4106.19132 | -4108.26716 | -4108.73696 | -4108.56820 | -4109.04048 | -4108.94837 | -4109.41450 | -4109.81465 | -4110.33275 |
| 11.53    | -4106.19129 | -4108.26713 | -4108.73692 | -4108.56818 | -4109.04046 | -4108.94837 | -4109.41450 | -4109.81465 | -4110.33275 |
| 11.62    | -4106.19127 | -4108.26710 | -4108.73689 | -4108.56817 | -4109.04044 | -4108.94837 | -4109.41449 | -4109.81466 | -4110.33275 |
| 11.72    | -4106.19125 | -4108.26708 | -4108.73687 | -4108.56816 | -4109.04043 | -4108.94837 | -4109.41449 | -4109.81467 | -4110.33275 |
| 11.81    | -4106.19123 | -4108.26705 | -4108.73684 | -4108.56815 | -4109.04041 | -4108.94837 | -4109.41449 | -4109.81468 | -4110.33274 |
| 11.91    | -4106.19121 | -4108.26703 | -4108.73682 | -4108.56814 | -4109.04040 | -4108.94837 | -4109.41449 | -4109.81468 | -4110.33274 |
| 12.00    | -4106.19119 | -4108.26702 | -4108.73680 | -4108.56813 | -4109.04039 | -4108.94837 | -4109.41449 | -4109.81469 | -4110.33274 |
| 12.09    | -4106.19117 | -4108.26700 | -4108.73678 | -4108.56813 | -4109.04037 | -4108.94837 | -4109.41449 | -4109.81470 | -4110.33274 |
| 12.19    | -4106.19116 | -4108.26698 | -4108.73676 | -4108.56812 | -4109.04036 | -4108.94838 | -4109.41449 | -4109.81470 | -4110.33274 |
| 12.28    | -4106.19114 | -4108.26697 | -4108.73674 | -4108.56811 | -4109.04035 | -4108.94838 | -4109.41449 | -4109.81470 | -4110.33273 |
| 12.38    | -4106.19113 | -4108.26695 | -4108.73672 | -4108.56810 | -4109.04034 | -4108.94839 | -4109.41449 | -4109.81470 | -4110.33273 |
| 12.47    | -4106.19112 | -4108.26694 | -4108.73671 | -4108.56810 | -4109.04033 | -4108.94839 | -4109.41449 | -4109.81471 | -4110.33273 |
| 12.57    | -4106.19110 | -4108.26693 | -4108.73669 | -4108.56809 | -4109.04032 | -4108.94840 | -4109.41449 | -4109.81471 | -4110.33272 |
| 12.66    | -4106.19109 | -4108.26691 | -4108.73668 | -4108.56809 | -4109.04031 | -4108.94840 | -4109.41450 | -4109.81471 | -4110.33272 |
| 12.76    | -4106.19108 | -4108.26690 | -4108.73667 | -4108.56808 | -4109.04030 | -4108.94840 | -4109.41450 | -4109.81471 | -4110.33271 |
| 12.85    | -4106.19107 | -4108.26689 | -4108.73666 | -4108.56808 | -4109.04030 | -4108.94841 | -4109.41450 | -4109.81471 | -4110.33271 |
| 12.94    | -4106.19106 | -4108.26689 | -4108.73665 | -4108.56807 | -4109.04029 | -4108.94841 | -4109.41451 | -4109.81471 | -4110.33271 |





Table S19: The absolute energies in hartree of the potential energy curve of NbSi in the  ${}^6\Sigma^+$  state with a SP-based wave function and nom-CPO active space.

| Distance | SP          | tpbe        | ftpbe       | trevpbe     | ftrevpbe    | tblyp       | ftblyp      | torelyp     | ftorelyp    |
|----------|-------------|-------------|-------------|-------------|-------------|-------------|-------------|-------------|-------------|
| 17.95    | -4106.19091 | -4108.26679 | -4108.73654 | -4108.56802 | -4109.04021 | -4108.94857 | -4109.41466 | -4109.81472 | -4110.33266 |
| 18.05    | -4106.19091 | -4108.26679 | -4108.73654 | -4108.56802 | -4109.04020 | -4108.94857 | -4109.41466 | -4109.81472 | -4110.33266 |

Table S20: The absolute energies in hartree of the potential energy curve of TaSi in the  ${}^4\Pi$  state with a CASSCF wave function and nom-CPO active space.

| Distance | CASSCF       | CASPT2       | tpbe         | ftpbe        | trevpbe      | ftrevpbe     | tblyp        | ftblyp       | torelyp      | ftorelyp     |
|----------|--------------|--------------|--------------|--------------|--------------|--------------|--------------|--------------|--------------|--------------|
| 1.98     | -15875.66545 | -15875.52591 | -13624.13035 | -15882.53475 | -15881.82797 | -15883.03563 | -15882.39855 | -15883.59737 | -15886.75513 | -15888.82284 |
| 2.08     | -15876.38964 | -15876.42485 | -14809.65790 | -15883.24327 | -15882.53853 | -15883.74553 | -15883.11082 | -15884.30908 | -15887.45922 | -15888.82284 |
| 2.17     | -15876.96475 | -15877.13780 | -15281.04072 | -15883.80324 | -15883.10039 | -15884.30579 | -15883.67701 | -15884.87469 | -15888.01824 | -15888.82284 |
| 2.27     | -15877.42742 | -15877.70559 | -15517.42338 | -15884.25151 | -15883.55402 | -15884.75489 | -15884.13140 | -15885.32559 | -15888.46661 | -15888.82284 |
| 2.36     | -15877.79631 | -15878.16106 | -15650.97622 | -15884.61174 | -15883.91488 | -15885.11626 | -15884.49280 | -15885.68717 | -15888.82284 | -15888.82284 |
| 2.46     | -15878.09015 | -15878.52289 | -15728.94442 | -15884.90017 | -15884.20237 | -15885.40578 | -15884.78089 | -15885.97645 | -15889.10616 | -15889.94319 |
| 2.55     | -15878.32512 | -15878.81062 | -15776.98372 | -15885.13205 | -15884.43397 | -15885.63865 | -15885.01367 | -15886.20896 | -15889.33386 | -15889.94319 |
| 2.65     | -15878.51399 | -15879.04069 | -15808.35744 | -15885.32544 | -15884.62979 | -15885.83247 | -15885.21041 | -15886.40574 | -15889.52471 | -15889.94319 |
| 2.74     | -15878.66670 | -15879.22994 | -15829.73166 | -15885.49361 | -15884.79826 | -15886.00131 | -15885.37916 | -15886.57501 | -15889.69135 | -15889.94319 |
| 2.83     | -15878.79086 | -15879.39793 | -15844.46597 | -15885.63263 | -15884.93743 | -15886.14094 | -15885.51853 | -15886.71504 | -15889.82901 | -15889.94319 |
| 2.93     | -15878.89232 | -15879.53659 | -15854.70028 | -15885.74789 | -15885.05291 | -15886.25677 | -15885.63413 | -15886.83121 | -15889.94319 | -15889.94319 |
| 3.02     | -15878.97552 | -15879.65164 | -15861.90270 | -15885.84381 | -15885.14966 | -15886.35325 | -15885.73092 | -15886.92796 | -15890.03871 | -15889.94319 |
| 3.12     | -15879.04410 | -15879.74782 | -15867.08246 | -15885.92798 | -15885.23633 | -15886.44046 | -15885.81575 | -15887.00743 | -15890.12472 | -15889.94319 |
| 3.21     | -15879.10251 | -15879.82526 | -15870.92758 | -15886.00099 | -15885.30937 | -15886.51416 | -15885.88816 | -15887.08051 | -15890.19544 | -15889.94319 |
| 3.31     | -15879.15201 | -15879.89602 | -15873.84000 | -15886.06198 | -15885.37100 | -15886.57566 | -15885.94960 | -15887.14182 | -15890.25531 | -15889.94319 |
| 3.40     | -15879.25588 | -15879.95596 | -15876.10216 | -15886.11257 | -15885.42228 | -15886.62671 | -15886.00085 | -15887.19279 | -15890.30514 | -15889.94319 |
| 3.50     | -15879.29878 | -15880.00590 | -15877.88824 | -15886.15427 | -15885.46459 | -15886.66882 | -15886.04320 | -15887.23489 | -15890.34617 | -15889.94319 |
| 3.59     | -15879.33402 | -15880.04706 | -15879.30758 | -15886.18826 | -15885.49920 | -15886.70320 | -15886.07790 | -15887.26931 | -15890.37964 | -15889.94319 |
| 3.68     | -15879.36269 | -15880.08065 | -15880.43576 | -15886.21569 | -15885.52729 | -15886.73101 | -15886.10611 | -15887.29717 | -15890.40670 | -15889.94319 |
| 3.78     | -15879.38573 | -15880.10775 | -15881.33076 | -15886.23764 | -15885.54978 | -15886.75331 | -15886.12875 | -15887.31954 | -15890.42826 | -15889.94319 |
| 3.87     | -15879.40397 | -15880.12930 | -15882.03993 | -15886.25490 | -15885.56751 | -15886.77089 | -15886.14667 | -15887.33723 | -15890.44517 | -15889.94319 |
| 3.97     | -15879.41813 | -15880.14612 | -15882.60064 | -15886.26812 | -15885.58124 | -15886.78442 | -15886.16060 | -15887.35087 | -15890.45816 | -15889.94319 |
| 4.06     | -15879.42883 | -15880.15893 | -15883.05309 | -15886.27796 | -15885.59157 | -15886.79455 | -15886.17115 | -15887.36113 | -15890.46782 | -15889.94319 |
| 4.16     | -15879.43823 | -15880.16835 | -15883.41286 | -15886.28500 | -15885.59901 | -15886.80187 | -15886.17884 | -15887.36858 | -15890.47468 | -15889.94319 |
| 4.25     | -15879.44381 | -15880.18131 | -15883.69944 | -15886.28968 | -15885.60708 | -15886.80680 | -15886.18746 | -15887.37367 | -15890.48176 | -15889.94319 |
| 4.35     | -15879.44734 | -15880.18186 | -15883.93043 | -15886.29232 | -15885.60839 | -15886.80969 | -15886.18907 | -15887.37672 | -15890.48266 | -15889.94319 |
| 4.44     | -15879.44915 | -15880.18106 | -15884.12588 | -15886.29327 | -15885.60831 | -15886.81087 | -15886.18930 | -15887.37806 | -15890.48221 | -15889.94319 |
| 4.54     | -15879.44955 | -15880.17916 | -15884.29359 | -15886.29286 | -15885.60709 | -15886.81068 | -15886.18841 | -15887.37803 | -15890.48065 | -15889.94319 |
| 4.63     | -15879.44881 | -15880.17638 | -15884.43202 | -15886.29137 | -15885.60493 | -15886.80941 | -15886.18658 | -15887.37690 | -15890.47817 | -15889.94319 |
| 4.72     | -15879.44714 | -15880.17291 | -15884.54679 | -15886.28898 | -15885.60203 | -15886.80723 | -15886.18399 | -15887.37485 | -15890.47496 | -15889.94319 |
| 4.82     | -15879.44474 | -15880.16889 | -15884.64286 | -15886.28583 | -15885.59854 | -15886.80430 | -15886.18083 | -15887.37201 | -15890.47118 | -15889.94319 |
| 4.91     | -15879.44178 | -15880.16446 | -15884.72832 | -15886.28211 | -15885.59459 | -15886.80078 | -15886.17718 | -15887.36857 | -15890.46694 | -15889.94319 |
| 5.01     | -15879.43840 | -15880.15973 | -15884.80083 | -15886.27795 | -15885.59028 | -15886.79684 | -15886.17315 | -15887.36465 | -15890.46232 | -15889.94319 |
| 5.10     | -15879.43473 | -15880.15478 | -15884.86204 | -15886.27348 | -15885.58566 | -15886.79258 | -15886.16880 | -15887.36037 | -15890.45739 | -15889.94319 |
| 5.20     | -15879.43087 | -15880.14968 | -15884.91291 | -15886.26874 | -15885.58083 | -15886.78808 | -15886.16420 | -15887.35579 | -15890.45223 | -15889.94319 |
| 5.29     | -15879.42692 | -15880.14448 | -15884.95483 | -15886.26378 | -15885.57581 | -15886.78335 | -15886.15937 | -15887.35093 | -15890.44687 | -15889.94319 |
| 5.39     | -15879.42296 | -15880.13922 | -15884.98908 | -15886.25864 | -15885.57062 | -15886.77846 | -15886.15433 | -15887.34584 | -15890.44131 | -15889.94319 |
| 5.48     | -15879.41905 | -15880.13391 | -15885.01682 | -15886.25337 | -15885.56523 | -15886.77344 | -15886.14903 | -15887.34056 | -15890.43553 | -15889.94319 |
| 5.57     | -15879.41525 | -15880.12850 | -15885.03898 | -15886.24799 | -15885.55952 | -15886.76833 | -15886.14333 | -15887.33514 | -15890.42938 | -15889.94319 |
| 5.67     | -15879.41161 | -15880.12288 | -15885.05640 | -15886.24254 | -15885.55314 | -15886.76316 | -15886.13688 | -15887.32963 | -15890.42250 | -15889.94319 |
| 5.76     | -15879.40821 | -15880.11758 | -15885.06984 | -15886.23703 | -15885.54690 | -15886.75796 | -15886.13061 | -15887.32406 | -15890.41587 | -15889.94319 |
| 5.86     | -15879.40507 | -15880.11300 | -15885.07989 | -15886.23152 | -15885.54166 | -15886.75271 | -15886.12547 | -15887.31854 | -15890.41044 | -15889.94319 |
| 5.95     | -15879.40216 | -15880.10853 | -15885.08708 | -15886.22619 | -15885.53650 | -15886.74762 | -15886.12046 | -15887.31326 | -15890.40520 | -15889.94319 |
| 6.05     | -15879.39945 | -15880.10467 | -15885.09469 | -15886.22121 | -15885.53243 | -15886.74285 | -15886.11666 | -15887.30842 | -15890.40116 | -15889.94319 |

Table S20: The absolute energies in hartree of the potential energy curve of TaSi in the  $^4\Pi$  state with a CASSCF wave function and nom-CPO active space.

| Distance | CASSCF       | CASPT2       | tpbe         | ftpb         | trevpbe      | ftrevpbe     | tblyp        | ftblyp       | torelyp      | ftorelyp     |
|----------|--------------|--------------|--------------|--------------|--------------|--------------|--------------|--------------|--------------|--------------|
| 6.14     | -15879.39697 | -15880.10139 | -15885.09578 | -15886.21671 | -15885.52923 | -15886.73855 | -15886.11378 | -15887.30416 | -15890.39803 | -15891.39803 |
| 6.24     | -15879.39466 | -15880.09834 | -15885.09551 | -15886.21282 | -15885.52638 | -15886.73481 | -15886.11131 | -15887.30055 | -15890.39530 | -15891.39530 |
| 6.33     | -15879.39250 | -15880.09550 | -15885.09410 | -15886.20949 | -15885.52379 | -15886.73160 | -15886.10917 | -15887.29758 | -15890.39288 | -15891.39288 |
| 6.43     | -15879.39051 | -15880.09288 | -15885.09178 | -15886.20659 | -15885.52141 | -15886.72880 | -15886.10726 | -15887.29509 | -15890.39069 | -15891.39069 |
| 6.52     | -15879.38870 | -15880.09049 | -15885.08871 | -15886.20403 | -15885.51918 | -15886.72632 | -15886.10552 | -15887.29298 | -15890.38869 | -15891.38869 |
| 6.61     | -15879.38707 | -15880.08832 | -15885.08508 | -15886.20174 | -15885.51709 | -15886.72409 | -15886.10391 | -15887.29119 | -15890.38683 | -15891.38683 |
| 6.71     | -15879.38561 | -15880.08634 | -15885.08099 | -15886.19970 | -15885.51512 | -15886.72210 | -15886.10240 | -15887.28969 | -15890.38509 | -15891.38509 |
| 6.80     | -15879.38430 | -15880.08455 | -15885.07654 | -15886.19786 | -15885.51325 | -15886.72030 | -15886.10097 | -15887.28842 | -15890.38346 | -15891.38346 |
| 6.90     | -15879.38314 | -15880.08293 | -15885.07180 | -15886.19620 | -15885.51150 | -15886.71866 | -15886.09963 | -15887.28735 | -15890.38194 | -15891.38194 |
| 6.99     | -15879.38210 | -15880.08148 | -15885.06684 | -15886.19467 | -15885.50987 | -15886.71716 | -15886.09838 | -15887.28643 | -15890.38053 | -15891.38053 |
| 7.09     | -15879.38118 | -15880.08015 | -15885.06170 | -15886.19326 | -15885.50834 | -15886.71576 | -15886.09719 | -15887.28564 | -15890.37922 | -15891.37922 |
| 7.18     | -15879.38037 | -15880.07896 | -15885.05638 | -15886.19193 | -15885.50694 | -15886.71445 | -15886.09610 | -15887.28493 | -15890.37803 | -15891.37803 |
| 7.28     | -15879.37965 | -15880.07787 | -15885.05085 | -15886.19066 | -15885.50565 | -15886.71320 | -15886.09509 | -15887.28427 | -15890.37695 | -15891.37695 |
| 7.37     | -15879.37902 | -15880.07689 | -15885.04500 | -15886.18944 | -15885.50448 | -15886.71201 | -15886.09416 | -15887.28364 | -15890.37597 | -15891.37597 |
| 7.46     | -15879.37845 | -15880.07600 | -15885.03845 | -15886.18828 | -15885.50341 | -15886.71087 | -15886.09331 | -15887.28304 | -15890.37509 | -15891.37509 |
| 7.56     | -15879.37796 | -15880.07519 | -15885.03205 | -15886.18716 | -15885.50244 | -15886.70977 | -15886.09254 | -15887.28244 | -15890.37430 | -15891.37430 |
| 7.65     | -15879.37751 | -15880.07445 | -15885.02668 | -15886.18609 | -15885.50156 | -15886.70873 | -15886.09183 | -15887.28186 | -15890.37360 | -15891.37360 |
| 7.75     | -15879.37712 | -15880.07376 | -15885.02138 | -15886.18507 | -15885.50078 | -15886.70775 | -15886.09119 | -15887.28129 | -15890.37299 | -15891.37299 |
| 7.84     | -15879.37677 | -15880.07314 | -15885.01718 | -15886.18412 | -15885.50008 | -15886.70684 | -15886.09062 | -15887.28075 | -15890.37245 | -15891.37245 |
| 7.94     | -15879.37646 | -15880.07256 | -15885.01387 | -15886.18322 | -15885.49945 | -15886.70598 | -15886.09010 | -15887.28022 | -15890.37198 | -15891.37198 |
| 8.03     | -15879.37619 | -15880.07202 | -15885.01091 | -15886.18232 | -15885.49888 | -15886.70512 | -15886.08964 | -15887.27968 | -15890.37157 | -15891.37157 |
| 8.13     | -15879.37594 | -15880.07153 | -15885.00823 | -15886.18154 | -15885.49838 | -15886.70438 | -15886.08922 | -15887.27920 | -15890.37121 | -15891.37121 |
| 8.22     | -15879.37572 | -15880.07108 | -15885.00575 | -15886.18090 | -15885.49794 | -15886.70380 | -15886.08885 | -15887.27881 | -15890.37090 | -15891.37090 |
| 8.31     | -15879.37552 | -15880.07066 | -15885.00344 | -15886.18034 | -15885.49754 | -15886.70329 | -15886.08852 | -15887.27846 | -15890.37064 | -15891.37064 |
| 8.41     | -15879.37534 | -15880.07028 | -15885.00126 | -15886.17984 | -15885.49719 | -15886.70284 | -15886.08822 | -15887.27815 | -15890.37042 | -15891.37042 |
| 8.50     | -15879.37518 | -15880.06992 | -15884.99920 | -15886.17939 | -15885.49689 | -15886.70245 | -15886.08796 | -15887.27788 | -15890.37023 | -15891.37023 |
| 8.60     | -15879.37504 | -15880.06960 | -15884.99726 | -15886.17898 | -15885.49661 | -15886.70209 | -15886.08773 | -15887.27762 | -15890.37008 | -15891.37008 |
| 8.69     | -15879.37491 | -15880.06930 | -15884.99542 | -15886.17861 | -15885.49637 | -15886.70177 | -15886.08752 | -15887.27740 | -15890.36995 | -15891.36995 |
| 8.79     | -15879.37479 | -15880.06903 | -15884.99371 | -15886.17828 | -15885.49616 | -15886.70149 | -15886.08734 | -15887.27720 | -15890.36984 | -15891.36984 |
| 8.88     | -15879.37469 | -15880.06878 | -15884.99210 | -15886.17799 | -15885.49597 | -15886.70125 | -15886.08717 | -15887.27703 | -15890.36975 | -15891.36975 |
| 8.98     | -15879.37459 | -15880.06855 | -15884.99062 | -15886.17773 | -15885.49581 | -15886.70103 | -15886.08703 | -15887.27687 | -15890.36968 | -15891.36968 |
| 9.07     | -15879.37450 | -15880.06834 | -15884.98925 | -15886.17748 | -15885.49566 | -15886.70084 | -15886.08690 | -15887.27673 | -15890.36962 | -15891.36962 |
| 9.17     | -15879.37442 | -15880.06815 | -15884.98799 | -15886.17727 | -15885.49554 | -15886.70067 | -15886.08679 | -15887.27661 | -15890.36958 | -15891.36958 |
| 9.26     | -15879.37435 | -15880.06797 | -15884.98684 | -15886.17708 | -15885.49543 | -15886.70052 | -15886.08669 | -15887.27650 | -15890.36955 | -15891.36955 |
| 9.35     | -15879.37429 | -15880.06780 | -15884.98579 | -15886.17691 | -15885.49533 | -15886.70040 | -15886.08660 | -15887.27641 | -15890.36953 | -15891.36953 |
| 9.45     | -15879.37423 | -15880.06765 | -15884.98484 | -15886.17676 | -15885.49525 | -15886.70028 | -15886.08654 | -15887.27632 | -15890.36951 | -15891.36951 |
| 9.54     | -15879.37417 | -15880.06751 | -15884.98398 | -15886.17662 | -15885.49517 | -15886.70018 | -15886.08647 | -15887.27625 | -15890.36950 | -15891.36950 |
| 9.64     | -15879.37412 | -15880.06738 | -15884.98320 | -15886.17649 | -15885.49511 | -15886.70009 | -15886.08641 | -15887.27619 | -15890.36950 | -15891.36950 |
| 9.73     | -15879.37408 | -15880.06726 | -15884.98249 | -15886.17638 | -15885.49505 | -15886.70001 | -15886.08636 | -15887.27613 | -15890.36950 | -15891.36950 |
| 9.83     | -15879.37404 | -15880.06715 | -15884.98186 | -15886.17627 | -15885.49501 | -15886.69994 | -15886.08632 | -15887.27608 | -15890.36950 | -15891.36950 |
| 9.92     | -15879.37400 | -15880.06705 | -15884.98129 | -15886.17618 | -15885.49496 | -15886.69988 | -15886.08629 | -15887.27604 | -15890.36951 | -15891.36951 |
| 10.02    | -15879.37396 | -15880.06695 | -15884.98077 | -15886.17610 | -15885.49493 | -15886.69983 | -15886.08626 | -15887.27601 | -15890.36952 | -15891.36952 |
| 10.11    | -15879.37393 | -15880.06686 | -15884.98031 | -15886.17602 | -15885.49490 | -15886.69978 | -15886.08623 | -15887.27598 | -15890.36953 | -15891.36953 |
| 10.20    | -15879.37390 | -15880.06678 | -15884.97989 | -15886.17596 | -15885.49487 | -15886.69975 | -15886.08621 | -15887.27595 | -15890.36954 | -15891.36954 |
| 10.30    | -15879.37388 | -15880.06670 | -15884.97952 | -15886.17590 | -15885.49485 | -15886.69972 | -15886.08619 | -15887.27593 | -15890.36955 | -15891.36955 |
| 10.39    | -15879.37385 | -15880.06664 | -15884.97918 | -15886.17585 | -15885.49483 | -15886.69969 | -15886.08618 | -15887.27592 | -15890.36956 | -15891.36956 |
| 10.49    | -15879.37383 | -15880.06657 | -15884.97888 | -15886.17580 | -15885.49481 | -15886.69967 | -15886.08617 | -15887.27591 | -15890.36957 | -15891.36957 |
| 10.58    | -15879.37381 | -15880.06651 | -15884.97861 | -15886.17576 | -15885.49479 | -15886.69965 | -15886.08616 | -15887.27590 | -15890.36958 | -15891.36958 |
| 10.68    | -15879.37379 | -15880.06645 | -15884.97837 | -15886.17572 | -15885.49478 | -15886.69963 | -15886.08616 | -15887.27589 | -15890.36959 | -15891.36959 |
| 10.77    | -15879.37377 | -15880.06640 | -15884.97815 | -15886.17568 | -15885.49477 | -15886.69961 | -15886.08615 | -15887.27588 | -15890.36960 | -15891.36960 |
| 10.87    | -15879.37375 | -15880.06635 | -15884.97795 | -15886.17565 | -15885.49475 | -15886.69959 | -15886.08614 | -15887.27588 | -15890.36961 | -15891.36961 |
| 10.96    | -15879.37374 | -15880.06630 | -15884.97778 | -15886.17561 | -15885.49475 | -15886.69957 | -15886.08615 | -15887.27587 | -15890.36962 | -15891.36962 |

Table S20: The absolute energies in hartree of the potential energy curve of TaSi in the  $^4\Pi$  state with a CASSCF wave function and nom-CPO active space.

| Distance | CASSCF       | CASPT2       | tpbe         | ftpbe        | trevpbe      | ftrevpbe     | tblyp        | ftblyp       | torelyp      | ftorelyp     |
|----------|--------------|--------------|--------------|--------------|--------------|--------------|--------------|--------------|--------------|--------------|
| 11.05    | -15879.37373 | -15880.06626 | -15884.97762 | -15886.17558 | -15885.49474 | -15886.69955 | -15886.08614 | -15887.27587 | -15890.36963 | -15891.56963 |
| 11.15    | -15879.37371 | -15880.06622 | -15884.97748 | -15886.17555 | -15885.49473 | -15886.69954 | -15886.08615 | -15887.27587 | -15890.36963 | -15891.56963 |
| 11.24    | -15879.37370 | -15880.06618 | -15884.97736 | -15886.17553 | -15885.49472 | -15886.69953 | -15886.08615 | -15887.27587 | -15890.36964 | -15891.56964 |
| 11.34    | -15879.37369 | -15880.06615 | -15884.97724 | -15886.17551 | -15885.49471 | -15886.69952 | -15886.08615 | -15887.27587 | -15890.36965 | -15891.56965 |
| 11.43    | -15879.37368 | -15880.06612 | -15884.97714 | -15886.17549 | -15885.49471 | -15886.69951 | -15886.08615 | -15887.27588 | -15890.36965 | -15891.56965 |
| 11.53    | -15879.37367 | -15880.06609 | -15884.97704 | -15886.17547 | -15885.49470 | -15886.69951 | -15886.08616 | -15887.27588 | -15890.36966 | -15891.56966 |
| 11.62    | -15879.37366 | -15880.06606 | -15884.97696 | -15886.17546 | -15885.49470 | -15886.69951 | -15886.08616 | -15887.27589 | -15890.36966 | -15891.56966 |
| 11.72    | -15879.37365 | -15880.06603 | -15884.97688 | -15886.17545 | -15885.49470 | -15886.69950 | -15886.08616 | -15887.27589 | -15890.36966 | -15891.56966 |
| 11.81    | -15879.37365 | -15880.06600 | -15884.97682 | -15886.17544 | -15885.49469 | -15886.69950 | -15886.08617 | -15887.27590 | -15890.36966 | -15891.56966 |
| 11.91    | -15879.37364 | -15880.06598 | -15884.97676 | -15886.17543 | -15885.49469 | -15886.69950 | -15886.08617 | -15887.27591 | -15890.36967 | -15891.56967 |
| 12.00    | -15879.37363 | -15880.06596 | -15884.97670 | -15886.17542 | -15885.49468 | -15886.69949 | -15886.08618 | -15887.27592 | -15890.36967 | -15891.56967 |
| 12.09    | -15879.37363 | -15880.06594 | -15884.97665 | -15886.17540 | -15885.49468 | -15886.69948 | -15886.08618 | -15887.27592 | -15890.36967 | -15891.56967 |
| 12.19    | -15879.37362 | -15880.06592 | -15884.97661 | -15886.17539 | -15885.49468 | -15886.69948 | -15886.08619 | -15887.27592 | -15890.36967 | -15891.56967 |
| 12.28    | -15879.37361 | -15880.06590 | -15884.97657 | -15886.17538 | -15885.49468 | -15886.69947 | -15886.08619 | -15887.27593 | -15890.36967 | -15891.56967 |
| 12.38    | -15879.37361 | -15880.06588 | -15884.97653 | -15886.17537 | -15885.49467 | -15886.69946 | -15886.08620 | -15887.27593 | -15890.36967 | -15891.56967 |
| 12.47    | -15879.37361 | -15880.06587 | -15884.97649 | -15886.17536 | -15885.49467 | -15886.69946 | -15886.08621 | -15887.27594 | -15890.36967 | -15891.56967 |
| 12.57    | -15879.37360 | -15880.06585 | -15884.97646 | -15886.17535 | -15885.49467 | -15886.69946 | -15886.08621 | -15887.27594 | -15890.36967 | -15891.56967 |
| 12.66    | -15879.37360 | -15880.06584 | -15884.97643 | -15886.17534 | -15885.49467 | -15886.69945 | -15886.08622 | -15887.27595 | -15890.36967 | -15891.56967 |
| 12.76    | -15879.37359 | -15880.06550 | -15884.97641 | -15886.17534 | -15885.49466 | -15886.69945 | -15886.08622 | -15887.27595 | -15890.36967 | -15891.56967 |
| 12.85    | -15879.37359 | -15880.06548 | -15884.97639 | -15886.17533 | -15885.49466 | -15886.69945 | -15886.08622 | -15887.27596 | -15890.36966 | -15891.56967 |
| 12.94    | -15879.37359 | -15880.06547 | -15884.97637 | -15886.17533 | -15885.49465 | -15886.69945 | -15886.08622 | -15887.27596 | -15890.36966 | -15891.56967 |
| 13.04    | -15879.37358 | -15880.06546 | -15884.97634 | -15886.17533 | -15885.49465 | -15886.69945 | -15886.08623 | -15887.27597 | -15890.36966 | -15891.56967 |
| 13.13    | -15879.37358 | -15880.06545 | -15884.97632 | -15886.17533 | -15885.49465 | -15886.69945 | -15886.08623 | -15887.27598 | -15890.36966 | -15891.56967 |

Table S20: The absolute energies in hartree of the potential energy curve of TaSi in the  $^4\Pi$  state with a CASSCF wave function and nom-CPO active space.

| Distance | CASSCF       | CASPT2       | tpbe         | ftpbe        | trevpbe      | ftrevpbe     | tblyp        | ftblyp       | torelyp      | ftorelyp     |
|----------|--------------|--------------|--------------|--------------|--------------|--------------|--------------|--------------|--------------|--------------|
| 15.97    | -15879.37354 | -15880.06528 | -15884.97612 | -15886.17528 | -15885.49462 | -15886.69941 | -15886.08630 | -15887.27606 | -15890.36963 | -15891.55928 |
| 16.06    | -15879.37354 | -15880.06528 | -15884.97612 | -15886.17528 | -15885.49462 | -15886.69941 | -15886.08630 | -15887.27606 | -15890.36963 | -15891.55928 |
| 16.16    | -15879.37354 | -15880.06528 | -15884.97612 | -15886.17528 | -15885.49462 | -15886.69941 | -15886.08630 | -15887.27606 | -15890.36963 | -15891.55928 |
| 16.25    | -15879.37354 | -15880.06527 | -15884.97612 | -15886.17528 | -15885.49462 | -15886.69941 | -15886.08630 | -15887.27606 | -15890.36963 | -15891.55928 |
| 16.35    | -15879.37354 | -15880.06527 | -15884.97612 | -15886.17528 | -15885.49461 | -15886.69941 | -15886.08630 | -15887.27607 | -15890.36963 | -15891.55928 |
| 16.44    | -15879.37354 | -15880.06527 | -15884.97612 | -15886.17528 | -15885.49462 | -15886.69941 | -15886.08630 | -15887.27607 | -15890.36963 | -15891.55928 |
| 16.54    | -15879.37354 | -15880.06527 | -15884.97612 | -15886.17528 | -15885.49461 | -15886.69941 | -15886.08630 | -15887.27607 | -15890.36963 | -15891.55928 |
| 16.63    | -15879.37354 | -15880.06527 | -15884.97612 | -15886.17528 | -15885.49462 | -15886.69941 | -15886.08630 | -15887.27607 | -15890.36963 | -15891.55928 |
| 16.72    | -15879.37354 | -15880.06527 | -15884.97611 | -15886.17528 | -15885.49461 | -15886.69941 | -15886.08630 | -15887.27607 | -15890.36963 | -15891.55928 |
| 16.82    | -15879.37354 | -15880.06527 | -15884.97611 | -15886.17528 | -15885.49461 | -15886.69941 | -15886.08630 | -15887.27607 | -15890.36963 | -15891.55928 |
| 16.91    | -15879.37354 | -15880.06526 | -15884.97611 | -15886.17528 | -15885.49461 | -15886.69941 | -15886.08630 | -15887.27608 | -15890.36962 | -15891.55928 |
| 17.01    | -15879.37354 | -15880.06526 | -15884.97611 | -15886.17528 | -15885.49461 | -15886.69941 | -15886.08630 | -15887.27608 | -15890.36962 | -15891.55928 |
| 17.10    | -15879.37354 | -15880.06526 | -15884.97611 | -15886.17528 | -15885.49461 | -15886.69941 | -15886.08630 | -15887.27608 | -15890.36962 | -15891.55928 |
| 17.20    | -15879.37353 | -15880.06526 | -15884.97611 | -15886.17528 | -15885.49461 | -15886.69941 | -15886.08630 | -15887.27608 | -15890.36962 | -15891.55928 |
| 17.29    | -15879.37353 | -15880.06526 | -15884.97611 | -15886.17528 | -15885.49461 | -15886.69941 | -15886.08630 | -15887.27608 | -15890.36962 | -15891.55928 |
| 17.39    | -15879.37353 | -15880.06526 | -15884.97611 | -15886.17528 | -15885.49461 | -15886.69941 | -15886.08630 | -15887.27608 | -15890.36962 | -15891.55928 |
| 17.48    | -15879.37353 | -15880.06526 | -15884.97611 | -15886.17528 | -15885.49461 | -15886.69941 | -15886.08630 | -15887.27608 | -15890.36962 | -15891.55928 |
| 17.57    | -15879.37353 | -15880.06526 | -15884.97611 | -15886.17528 | -15885.49461 | -15886.69941 | -15886.08630 | -15887.27608 | -15890.36962 | -15891.55928 |
| 17.67    | -15879.37353 | -15880.06526 | -15884.97611 | -15886.17528 | -15885.49461 | -15886.69941 | -15886.08630 | -15887.27608 | -15890.36962 | -15891.55928 |
| 17.76    | -15879.37353 | -15880.06526 | -15884.97610 | -15886.17528 | -15885.49461 | -15886.69941 | -15886.08630 | -15887.27608 | -15890.36962 | -15891.55928 |
| 17.86    | -15879.37353 | -15880.06525 | -15884.97611 | -15886.17528 | -15885.49461 | -15886.69941 | -15886.08630 | -15887.27608 | -15890.36962 | -15891.55928 |
| 17.95    | -15879.37353 | -15880.06525 | -15884.97610 | -15886.17528 | -15885.49461 | -15886.69941 | -15886.08630 | -15887.27608 | -15890.36962 | -15891.55928 |
| 18.05    | -15879.37353 | -15880.06525 | -15884.97611 | -15886.17528 | -15885.49461 | -15886.69941 | -15886.08630 | -15887.27608 | -15890.36962 | -15891.55928 |

Table S21: The absolute energies in hartree of the potential energy curve of TaSi in the  $^6\Sigma^+$  state with a CASSCF wave function and nom-CPO active space.

| Distance | CASSCF       | CASPT2       | tpbe         | ftpbe        | trevpbe      | ftrevpbe     | tblyp        | ftblyp       | torelyp      | ftorelyp     |
|----------|--------------|--------------|--------------|--------------|--------------|--------------|--------------|--------------|--------------|--------------|
| 1.98     | -15875.58885 | -15876.39081 | -15881.29987 | -15882.48683 | -15881.79542 | -15882.98701 | -15882.36773 | -15883.54544 | -15886.71646 | -15888.90298 |
| 2.08     | -15876.31199 | -15877.11213 | -15882.01661 | -15883.20326 | -15882.51350 | -15883.70485 | -15883.08709 | -15884.26452 | -15887.42747 | -15889.61499 |
| 2.17     | -15876.88549 | -15877.68327 | -15882.58402 | -15883.77041 | -15883.08216 | -15884.27334 | -15883.65666 | -15884.83386 | -15887.98994 | -15889.19298 |
| 2.27     | -15877.34050 | -15878.13527 | -15883.03275 | -15884.21904 | -15883.53216 | -15884.72339 | -15884.10711 | -15885.28410 | -15888.43451 | -15889.62749 |
| 2.36     | -15877.70233 | -15878.49420 | -15883.38967 | -15884.57586 | -15883.89024 | -15885.08150 | -15884.46548 | -15885.64225 | -15888.78795 | -15889.98000 |
| 2.46     | -15877.99126 | -15878.78048 | -15883.67482 | -15884.86090 | -15884.17647 | -15885.36773 | -15884.75189 | -15885.92842 | -15889.07021 | -15889.26271 |
| 2.55     | -15878.22068 | -15879.00138 | -15883.89474 | -15885.07777 | -15884.39609 | -15885.58451 | -15884.97431 | -15886.14765 | -15889.28431 | -15889.47681 |
| 2.65     | -15878.42518 | -15879.20354 | -15884.09678 | -15885.27959 | -15884.59903 | -15885.78721 | -15885.17736 | -15886.35054 | -15889.48466 | -15889.67716 |
| 2.74     | -15878.59306 | -15879.36996 | -15884.26394 | -15885.44659 | -15884.76700 | -15885.95501 | -15885.34541 | -15886.51847 | -15889.65049 | -15889.84281 |
| 2.83     | -15878.73176 | -15879.45707 | -15884.34238 | -15885.53199 | -15884.84646 | -15886.04146 | -15885.42512 | -15886.60242 | -15889.73290 | -15889.92501 |
| 2.93     | -15878.84703 | -15879.57597 | -15884.46243 | -15885.65195 | -15884.96711 | -15886.16227 | -15885.54545 | -15886.72268 | -15889.85115 | -15889.10301 |
| 3.02     | -15878.94427 | -15879.67870 | -15884.56696 | -15885.75613 | -15885.07216 | -15886.26725 | -15885.65021 | -15886.82716 | -15889.95385 | -15889.20571 |
| 3.12     | -15879.02767 | -15879.76668 | -15884.66294 | -15885.85307 | -15885.16893 | -15886.36557 | -15885.74625 | -15886.92504 | -15890.05099 | -15889.30801 |
| 3.21     | -15879.09199 | -15879.84212 | -15884.74126 | -15885.93096 | -15885.24768 | -15886.44401 | -15885.82474 | -15887.00324 | -15890.12778 | -15889.38571 |
| 3.31     | -15879.14909 | -15879.90618 | -15884.80688 | -15885.99609 | -15885.31375 | -15886.50959 | -15885.89076 | -15887.06889 | -15890.19230 | -15889.46341 |
| 3.40     | -15879.20166 | -15879.96016 | -15884.86200 | -15886.05074 | -15885.36932 | -15886.56467 | -15885.94639 | -15887.12415 | -15890.24655 | -15889.54111 |
| 3.50     | -15879.25272 | -15880.00538 | -15884.90813 | -15886.09643 | -15885.41589 | -15886.61075 | -15885.99306 | -15887.17046 | -15890.29194 | -15889.61881 |
| 3.59     | -15879.29297 | -15880.04298 | -15884.94653 | -15886.13440 | -15885.45471 | -15886.64911 | -15886.03204 | -15887.20908 | -15890.32971 | -15889.65651 |
| 3.68     | -15879.32644 | -15880.07402 | -15884.97835 | -15886.16577 | -15885.48693 | -15886.68082 | -15886.06446 | -15887.24114 | -15890.36099 | -15889.69421 |
| 3.78     | -15879.35404 | -15880.09949 | -15885.00456 | -15886.19142 | -15885.51351 | -15886.70677 | -15886.09139 | -15887.26756 | -15890.38674 | -15889.72191 |
| 3.87     | -15879.37656 | -15880.12113 | -15885.02789 | -15886.21315 | -15885.53712 | -15886.72856 | -15886.11602 | -15887.29065 | -15890.40941 | -15889.74961 |
| 3.97     | -15879.39470 | -15880.13758 | -15885.04534 | -15886.23023 | -15885.55489 | -15886.74593 | -15886.13408 | -15887.30837 | -15890.42646 | -15889.77216 |
| 4.06     | -15879.40610 | -15880.15038 | -15885.05900 | -15886.24364 | -15885.56888 | -15886.75963 | -15886.14833 | -15887.32238 | -15890.43980 | -15889.78496 |

Table S21: The absolute energies in hartree of the potential energy curve of TaSi in the  ${}^6\Sigma^+$  state with a CASSCF wave function and nom-CPO active space.

| Distance | CASSCF       | CASPT2       | tpbe         | ftpbe        | trevpbe      | ftrevpbe     | tblyp        | ftblyp       | torelyp      | ftorelyp     |
|----------|--------------|--------------|--------------|--------------|--------------|--------------|--------------|--------------|--------------|--------------|
| 4.16     | -15879.41777 | -15880.16008 | -15885.06950 | -15886.25394 | -15885.57968 | -15886.77021 | -15886.15938 | -15887.33326 | -15890.45005 | -15891.62222 |
| 4.25     | -15879.42669 | -15880.17201 | -15885.08291 | -15886.26708 | -15885.59364 | -15886.78386 | -15886.17387 | -15887.34750 | -15890.46311 | -15891.63533 |
| 4.35     | -15879.43328 | -15880.17500 | -15885.08655 | -15886.27063 | -15885.59754 | -15886.78765 | -15886.17803 | -15887.35159 | -15890.46665 | -15891.63887 |
| 4.44     | -15879.43787 | -15880.17642 | -15885.08860 | -15886.27261 | -15885.59984 | -15886.78986 | -15886.18060 | -15887.35410 | -15890.46865 | -15891.64087 |
| 4.54     | -15879.44079 | -15880.17655 | -15885.08934 | -15886.27330 | -15885.60081 | -15886.79076 | -15886.18185 | -15887.35531 | -15890.46936 | -15891.64158 |
| 4.63     | -15879.44230 | -15880.17560 | -15885.08896 | -15886.27289 | -15885.60065 | -15886.79054 | -15886.18198 | -15887.35541 | -15890.46899 | -15891.64121 |
| 4.72     | -15879.44263 | -15880.17377 | -15885.08766 | -15886.27157 | -15885.59956 | -15886.78941 | -15886.18119 | -15887.35461 | -15890.46773 | -15891.64045 |
| 4.82     | -15879.44199 | -15880.17124 | -15885.08564 | -15886.26954 | -15885.59774 | -15886.78756 | -15886.17967 | -15887.35308 | -15890.46576 | -15891.63848 |
| 4.91     | -15879.44055 | -15880.16814 | -15885.08303 | -15886.26693 | -15885.59532 | -15886.78512 | -15886.17755 | -15887.35097 | -15890.46323 | -15891.63593 |
| 5.01     | -15879.43846 | -15880.16459 | -15885.07993 | -15886.26385 | -15885.59240 | -15886.78220 | -15886.17494 | -15887.34838 | -15890.46022 | -15891.63292 |
| 5.10     | -15879.43585 | -15880.16071 | -15885.07645 | -15886.26039 | -15885.58910 | -15886.77889 | -15886.17194 | -15887.34540 | -15890.45686 | -15891.62956 |
| 5.20     | -15879.43284 | -15880.15657 | -15885.07269 | -15886.25666 | -15885.58550 | -15886.77531 | -15886.16865 | -15887.34214 | -15890.45321 | -15891.62621 |
| 5.29     | -15879.42952 | -15880.15224 | -15885.06871 | -15886.25272 | -15885.58169 | -15886.77151 | -15886.16514 | -15887.33866 | -15890.44937 | -15891.62237 |
| 5.39     | -15879.42597 | -15880.14778 | -15885.06455 | -15886.24862 | -15885.57770 | -15886.76755 | -15886.16144 | -15887.33500 | -15890.44536 | -15891.61836 |
| 5.48     | -15879.42226 | -15880.14324 | -15885.06026 | -15886.24438 | -15885.57356 | -15886.76345 | -15886.15759 | -15887.33120 | -15890.44123 | -15891.61423 |
| 5.57     | -15879.41845 | -15880.13865 | -15885.05587 | -15886.24005 | -15885.56932 | -15886.75926 | -15886.15362 | -15887.32729 | -15890.43699 | -15891.61000 |
| 5.67     | -15879.41459 | -15880.13401 | -15885.05135 | -15886.23561 | -15885.56496 | -15886.75495 | -15886.14950 | -15887.32324 | -15890.43263 | -15891.60564 |
| 5.76     | -15879.41073 | -15880.12920 | -15885.04651 | -15886.23089 | -15885.56029 | -15886.75037 | -15886.14503 | -15887.31887 | -15890.42792 | -15891.60093 |
| 5.86     | -15879.40691 | -15880.12173 | -15885.03701 | -15886.22178 | -15885.55107 | -15886.74155 | -15886.13554 | -15887.30978 | -15890.41806 | -15891.59206 |
| 5.95     | -15879.40319 | -15880.11527 | -15885.02882 | -15886.21385 | -15885.54312 | -15886.73384 | -15886.12755 | -15887.30207 | -15890.40966 | -15891.58366 |
| 6.05     | -15879.39980 | -15880.10688 | -15885.01935 | -15886.20476 | -15885.53385 | -15886.72484 | -15886.11859 | -15887.29371 | -15890.39929 | -15891.57429 |
| 6.14     | -15879.39703 | -15880.10296 | -15885.01549 | -15886.20095 | -15885.53010 | -15886.72109 | -15886.11530 | -15887.29048 | -15890.39557 | -15891.57057 |
| 6.24     | -15879.39478 | -15880.09946 | -15885.01192 | -15886.19741 | -15885.52663 | -15886.71762 | -15886.11230 | -15887.28753 | -15890.39222 | -15891.56722 |
| 6.33     | -15879.39275 | -15880.09626 | -15885.00853 | -15886.19406 | -15885.52334 | -15886.71434 | -15886.10947 | -15887.28478 | -15890.38908 | -15891.56408 |
| 6.43     | -15879.39093 | -15880.09333 | -15885.00532 | -15886.19089 | -15885.52022 | -15886.71123 | -15886.10683 | -15887.28220 | -15890.38613 | -15891.56113 |
| 6.52     | -15879.38932 | -15880.09065 | -15885.00231 | -15886.18793 | -15885.51730 | -15886.70834 | -15886.10436 | -15887.27980 | -15890.38338 | -15891.55838 |
| 6.61     | -15879.38790 | -15880.08824 | -15884.99954 | -15886.18520 | -15885.51462 | -15886.70568 | -15886.10210 | -15887.27760 | -15890.38087 | -15891.55587 |
| 6.71     | -15879.38665 | -15880.08608 | -15884.99701 | -15886.18270 | -15885.51217 | -15886.70326 | -15886.10003 | -15887.27559 | -15890.37859 | -15891.55359 |
| 6.80     | -15879.38557 | -15880.08415 | -15884.99473 | -15886.18044 | -15885.50997 | -15886.70108 | -15886.09818 | -15887.27378 | -15890.37655 | -15891.55155 |
| 6.90     | -15879.38462 | -15880.08243 | -15884.99266 | -15886.17839 | -15885.50798 | -15886.69911 | -15886.09650 | -15887.27214 | -15890.37471 | -15891.54971 |
| 6.99     | -15879.38379 | -15880.08090 | -15884.99079 | -15886.17654 | -15885.50620 | -15886.69734 | -15886.09500 | -15887.27067 | -15890.37308 | -15891.54808 |
| 7.09     | -15879.38307 | -15880.07952 | -15884.98911 | -15886.17487 | -15885.50460 | -15886.69575 | -15886.09364 | -15887.26934 | -15890.37163 | -15891.54663 |
| 7.18     | -15879.38244 | -15880.07830 | -15884.98760 | -15886.17337 | -15885.50317 | -15886.69433 | -15886.09243 | -15887.26814 | -15890.37034 | -15891.54534 |
| 7.28     | -15879.38189 | -15880.07720 | -15884.98624 | -15886.17201 | -15885.50189 | -15886.69305 | -15886.09135 | -15887.26707 | -15890.36920 | -15891.54420 |
| 7.37     | -15879.38140 | -15880.07621 | -15884.98502 | -15886.17079 | -15885.50074 | -15886.69191 | -15886.09038 | -15887.26610 | -15890.36820 | -15891.54320 |
| 7.46     | -15879.38097 | -15880.07532 | -15884.98391 | -15886.16968 | -15885.49971 | -15886.69088 | -15886.08951 | -15887.26523 | -15890.36731 | -15891.54231 |
| 7.56     | -15879.38059 | -15880.07451 | -15884.98291 | -15886.16868 | -15885.49879 | -15886.68995 | -15886.08873 | -15887.26444 | -15890.36652 | -15891.54152 |
| 7.65     | -15879.38026 | -15880.07379 | -15884.98202 | -15886.16777 | -15885.49797 | -15886.68912 | -15886.08802 | -15887.26373 | -15890.36584 | -15891.54084 |
| 7.75     | -15879.37996 | -15880.07313 | -15884.98121 | -15886.16695 | -15885.49723 | -15886.68838 | -15886.08739 | -15887.26309 | -15890.36523 | -15891.54023 |
| 7.84     | -15879.37970 | -15880.07253 | -15884.98048 | -15886.16621 | -15885.49658 | -15886.68771 | -15886.08683 | -15887.26252 | -15890.36471 | -15891.53971 |
| 7.94     | -15879.37946 | -15880.07199 | -15884.97982 | -15886.16554 | -15885.49599 | -15886.68712 | -15886.08633 | -15887.26201 | -15890.36425 | -15891.53925 |
| 8.03     | -15879.37926 | -15880.07149 | -15884.97923 | -15886.16494 | -15885.49547 | -15886.68658 | -15886.08588 | -15887.26155 | -15890.36386 | -15891.53886 |
| 8.13     | -15879.37907 | -15880.07104 | -15884.97870 | -15886.16439 | -15885.49501 | -15886.68610 | -15886.08548 | -15887.26113 | -15890.36352 | -15891.53852 |
| 8.22     | -15879.37890 | -15880.07063 | -15884.97822 | -15886.16390 | -15885.49459 | -15886.68568 | -15886.08512 | -15887.26075 | -15890.36322 | -15891.53822 |
| 8.31     | -15879.37876 | -15880.07026 | -15884.97778 | -15886.16345 | -15885.49422 | -15886.68529 | -15886.08480 | -15887.26042 | -15890.36297 | -15891.53797 |
| 8.41     | -15879.37862 | -15880.06992 | -15884.97739 | -15886.16305 | -15885.49390 | -15886.68496 | -15886.08451 | -15887.26012 | -15890.36276 | -15891.53776 |
| 8.50     | -15879.37851 | -15880.06961 | -15884.97705 | -15886.16269 | -15885.49361 | -15886.68465 | -15886.08426 | -15887.25985 | -15890.36258 | -15891.53758 |
| 8.60     | -15879.37840 | -15880.06932 | -15884.97673 | -15886.16237 | -15885.49336 | -15886.68439 | -15886.08404 | -15887.25961 | -15890.36243 | -15891.53743 |
| 8.69     | -15879.37831 | -15880.06906 | -15884.97645 | -15886.16207 | -15885.49314 | -15886.68415 | -15886.08384 | -15887.25939 | -15890.36230 | -15891.53730 |
| 8.79     | -15879.37822 | -15880.06882 | -15884.97620 | -15886.16181 | -15885.49294 | -15886.68394 | -15886.08366 | -15887.25920 | -15890.36220 | -15891.53720 |
| 8.88     | -15879.37814 | -15880.06859 | -15884.97597 | -15886.16157 | -15885.49277 | -15886.68375 | -15886.08351 | -15887.25903 | -15890.36212 | -15891.53712 |
| 8.98     | -15879.37808 | -15880.06839 | -15884.97577 | -15886.16135 | -15885.49261 | -15886.68358 | -15886.08337 | -15887.25888 | -15890.36205 | -15891.53705 |

Table S21: The absolute energies in hartree of the potential energy curve of TaSi in the  ${}^6\Sigma^+$  state with a CASSCF wave function and nom-CPO active space.

| Distance | CASSCF       | CASPT2       | tpbe         | ftpbe        | trevpbe      | ftrevpbe     | tblyp        | ftblyp       | torelyp      | ftorelyp     |
|----------|--------------|--------------|--------------|--------------|--------------|--------------|--------------|--------------|--------------|--------------|
| 9.07     | -15879.37801 | -15880.06820 | -15884.97558 | -15886.16115 | -15885.49248 | -15886.68344 | -15886.08325 | -15887.25874 | -15890.36199 | -15891.52199 |
| 9.17     | -15879.37796 | -15880.06803 | -15884.97542 | -15886.16098 | -15885.49236 | -15886.68331 | -15886.08314 | -15887.25862 | -15890.36196 | -15891.52189 |
| 9.26     | -15879.37791 | -15880.06787 | -15884.97527 | -15886.16082 | -15885.49226 | -15886.68319 | -15886.08305 | -15887.25852 | -15890.36193 | -15891.52180 |
| 9.35     | -15879.37786 | -15880.06773 | -15884.97514 | -15886.16068 | -15885.49217 | -15886.68309 | -15886.08297 | -15887.25842 | -15890.36191 | -15891.52171 |
| 9.45     | -15879.37782 | -15880.06759 | -15884.97502 | -15886.16055 | -15885.49210 | -15886.68300 | -15886.08290 | -15887.25834 | -15890.36189 | -15891.52162 |
| 9.54     | -15879.37779 | -15880.06747 | -15884.97491 | -15886.16043 | -15885.49203 | -15886.68292 | -15886.08290 | -15887.25827 | -15890.36189 | -15891.52153 |
| 9.64     | -15879.37776 | -15880.06735 | -15884.97482 | -15886.16033 | -15885.49197 | -15886.68285 | -15886.08290 | -15887.25820 | -15890.36188 | -15891.52144 |
| 9.73     | -15879.37773 | -15880.06724 | -15884.97473 | -15886.16023 | -15885.49192 | -15886.68279 | -15886.08290 | -15887.25814 | -15890.36188 | -15891.52135 |
| 9.83     | -15879.37770 | -15880.06714 | -15884.97465 | -15886.16014 | -15885.49187 | -15886.68273 | -15886.08290 | -15887.25809 | -15890.36189 | -15891.52126 |
| 9.92     | -15879.37768 | -15880.06705 | -15884.97458 | -15886.16007 | -15885.49184 | -15886.68269 | -15886.08290 | -15887.25805 | -15890.36189 | -15891.52117 |
| 10.02    | -15879.37765 | -15880.06697 | -15884.97452 | -15886.16000 | -15885.49180 | -15886.68265 | -15886.08290 | -15887.25802 | -15890.36190 | -15891.52108 |
| 10.11    | -15879.37764 | -15880.06689 | -15884.97446 | -15886.15993 | -15885.49178 | -15886.68261 | -15886.08290 | -15887.25798 | -15890.36191 | -15891.52099 |
| 10.20    | -15879.37762 | -15880.06681 | -15884.97441 | -15886.15987 | -15885.49175 | -15886.68257 | -15886.08290 | -15887.25796 | -15890.36192 | -15891.52090 |
| 10.30    | -15879.37760 | -15880.06674 | -15884.97436 | -15886.15982 | -15885.49173 | -15886.68254 | -15886.08290 | -15887.25793 | -15890.36194 | -15891.52081 |
| 10.39    | -15879.37759 | -15880.06668 | -15884.97432 | -15886.15977 | -15885.49171 | -15886.68252 | -15886.08290 | -15887.25791 | -15890.36195 | -15891.52072 |
| 10.49    | -15879.37757 | -15880.06662 | -15884.97428 | -15886.15973 | -15885.49169 | -15886.68249 | -15886.08290 | -15887.25790 | -15890.36195 | -15891.52063 |
| 10.58    | -15879.37756 | -15880.06656 | -15884.97425 | -15886.15969 | -15885.49168 | -15886.68247 | -15886.08290 | -15887.25788 | -15890.36196 | -15891.52054 |
| 10.68    | -15879.37755 | -15880.06651 | -15884.97421 | -15886.15965 | -15885.49166 | -15886.68245 | -15886.08290 | -15887.25787 | -15890.36197 | -15891.52045 |
| 10.77    | -15879.37754 | -15880.06646 | -15884.97419 | -15886.15962 | -15885.49165 | -15886.68243 | -15886.08290 | -15887.25786 | -15890.36198 | -15891.52036 |
| 10.87    | -15879.37753 | -15880.06641 | -15884.97416 | -15886.15959 | -15885.49165 | -15886.68242 | -15886.08290 | -15887.25786 | -15890.36199 | -15891.52027 |
| 10.96    | -15879.37753 | -15880.06637 | -15884.97414 | -15886.15956 | -15885.49164 | -15886.68241 | -15886.08290 | -15887.25785 | -15890.36200 | -15891.52018 |
| 11.05    | -15879.37752 | -15880.06633 | -15884.97411 | -15886.15954 | -15885.49163 | -15886.68240 | -15886.08290 | -15887.25785 | -15890.36201 | -15891.52009 |
| 11.15    | -15879.37751 | -15880.06629 | -15884.97409 | -15886.15951 | -15885.49162 | -15886.68238 | -15886.08290 | -15887.25784 | -15890.36202 | -15891.52000 |
| 11.24    | -15879.37751 | -15880.06626 | -15884.97407 | -15886.15949 | -15885.49162 | -15886.68237 | -15886.08290 | -15887.25784 | -15890.36202 | -15891.51991 |
| 11.34    | -15879.37750 | -15880.06622 | -15884.97405 | -15886.15947 | -15885.49161 | -15886.68236 | -15886.08290 | -15887.25784 | -15890.36203 | -15891.51982 |
| 11.43    | -15879.37750 | -15880.06619 | -15884.97404 | -15886.15945 | -15885.49160 | -15886.68235 | -15886.08290 | -15887.25784 | -15890.36203 | -15891.51973 |
| 11.53    | -15879.37749 | -15880.06616 | -15884.97403 | -15886.15943 | -15885.49160 | -15886.68234 | -15886.08290 | -15887.25784 | -15890.36203 | -15891.51964 |
| 11.62    | -15879.37749 | -15880.06613 | -15884.97401 | -15886.15941 | -15885.49159 | -15886.68233 | -15886.08290 | -15887.25784 | -15890.36204 | -15891.51955 |
| 11.72    | -15879.37749 | -15880.06610 | -15884.97400 | -15886.15940 | -15885.49159 | -15886.68233 | -15886.08290 | -15887.25784 | -15890.36204 | -15891.51946 |
| 11.81    | -15879.37748 | -15880.06608 | -15884.97399 | -15886.15939 | -15885.49158 | -15886.68232 | -15886.08290 | -15887.25784 | -15890.36204 | -15891.51937 |
| 11.91    | -15879.37748 | -15880.06606 | -15884.97398 | -15886.15938 | -15885.49158 | -15886.68231 | -15886.08290 | -15887.25785 | -15890.36204 | -15891.51928 |
| 12.00    | -15879.37748 | -15880.06603 | -15884.97397 | -15886.15937 | -15885.49158 | -15886.68231 | -15886.08290 | -15887.25785 | -15890.36204 | -15891.51919 |
| 12.09    | -15879.37748 | -15880.06601 | -15884.97396 | -15886.15936 | -15885.49157 | -15886.68230 | -15886.08290 | -15887.25785 | -15890.36204 | -15891.51910 |
| 12.19    | -15879.37747 | -15880.06599 | -15884.97395 | -15886.15935 | -15885.49157 | -15886.68230 | -15886.08290 | -15887.25786 | -15890.36204 | -15891.51901 |
| 12.28    | -15879.37747 | -15880.06597 | -15884.97394 | -15886.15934 | -15885.49157 | -15886.68229 | -15886.08290 | -15887.25786 | -15890.36204 | -15891.51892 |
| 12.38    | -15879.37747 | -15880.06595 | -15884.97394 | -15886.15933 | -15885.49156 | -15886.68229 | -15886.08290 | -15887.25786 | -15890.36204 | -15891.51883 |
| 12.47    | -15879.37747 | -15880.06593 | -15884.97393 | -15886.15932 | -15885.49156 | -15886.68228 | -15886.08290 | -15887.25787 | -15890.36204 | -15891.51874 |
| 12.57    | -15879.37747 | -15880.06592 | -15884.97392 | -15886.15931 | -15885.49156 | -15886.68228 | -15886.08290 | -15887.25787 | -15890.36204 | -15891.51865 |
| 12.66    | -15879.37747 | -15880.06590 | -15884.97392 | -15886.15930 | -15885.49155 | -15886.68227 | -15886.08290 | -15887.25787 | -15890.36204 | -15891.51856 |
| 12.76    | -15879.37746 | -15880.06589 | -15884.97391 | -15886.15930 | -15885.49155 | -15886.68227 | -15886.08290 | -15887.25788 | -15890.36204 | -15891.51847 |
| 12.85    | -15879.37746 | -15880.06588 | -15884.97391 | -15886.15929 | -15885.49155 | -15886.68226 | -15886.08290 | -15887.25788 | -15890.36204 | -15891.51838 |
| 12.94    | -15879.37746 | -15880.06580 | -15884.97390 | -15886.15929 | -15885.49155 | -15886.68226 | -15886.08290 | -15887.25788 | -15890.36204 | -15891.51829 |
| 13.04    | -15879.37746 | -15880.06578 | -15884.97390 | -15886.15928 | -15885.49155 | -15886.68226 | -15886.08290 | -15887.25789 | -15890.36203 | -15891.51820 |
| 13.13    | -15879.37746 | -15880.06578 | -15884.97389 | -15886.15928 | -15885.49154 | -15886.68226 | -15886.08290 | -15887.25789 | -15890.36203 | -15891.51811 |
| 13.23    | -15879.37746 | -15880.06574 | -15884.97389 | -15886.15928 | -15885.49154 | -15886.68225 | -15886.08290 | -15887.25789 | -15890.36203 | -15891.51802 |
| 13.32    | -15879.37746 | -15880.06573 | -15884.97389 | -15886.15927 | -15885.49154 | -15886.68225 | -15886.08290 | -15887.25790 | -15890.36203 | -15891.51793 |
| 13.42    | -15879.37746 | -15880.06572 | -15884.97388 | -15886.15927 | -15885.49154 | -15886.68225 | -15886.08290 | -15887.25790 | -15890.36203 | -15891.51784 |
| 13.51    | -15879.37746 | -15880.06571 | -15884.97388 | -15886.15927 | -15885.49154 | -15886.68224 | -15886.08290 | -15887.25790 | -15890.36203 | -15891.51775 |
| 13.61    | -15879.37746 | -15880.06571 | -15884.97388 | -15886.15926 | -15885.49154 | -15886.68224 | -15886.08290 | -15887.25791 | -15890.36203 | -15891.51766 |
| 13.70    | -15879.37746 | -15880.06570 | -15884.97387 | -15886.15926 | -15885.49153 | -15886.68224 | -15886.08290 | -15887.25791 | -15890.36202 | -15891.51757 |
| 13.80    | -15879.37746 | -15880.06569 | -15884.97387 | -15886.15926 | -15885.49153 | -15886.68224 | -15886.08290 | -15887.25791 | -15890.36202 | -15891.51748 |
| 13.89    | -15879.37746 | -15880.06569 | -15884.97387 | -15886.15925 | -15885.49153 | -15886.68223 | -15886.08290 | -15887.25791 | -15890.36202 | -15891.51739 |



Table S22: The absolute energies in hartree of the potential energy curve of TaSi in the  $^2\Delta$  state with a CASSCF wave function and nom-CPO active space.

| Distance | CASSCF       | CASPT2       | tpbe         | ftpb         | trevpbe      | ftrevpbe     | tblyp        | ftblyp       | torelyp      | ftorelyp     |
|----------|--------------|--------------|--------------|--------------|--------------|--------------|--------------|--------------|--------------|--------------|
| 2.17     | -15877.01649 | -15877.76969 | -15882.67732 | -15883.86714 | -15883.17799 | -15884.36816 | -15883.75504 | -15884.94370 | -15888.09647 | -15888.55615 |
| 2.27     | -15877.45408 | -15878.23660 | -15883.14107 | -15884.33038 | -15883.64290 | -15884.83253 | -15884.22060 | -15885.40881 | -15888.55615 | -15888.55615 |
| 2.36     | -15877.82720 | -15878.52900 | -15883.44354 | -15884.63432 | -15883.94502 | -15885.13712 | -15884.52337 | -15885.71298 | -15888.84821 | -15889.15975 |
| 2.46     | -15878.12470 | -15878.84588 | -15883.75752 | -15884.94778 | -15884.25995 | -15885.45147 | -15884.83871 | -15886.02776 | -15889.15975 | -15889.15975 |
| 2.55     | -15878.36300 | -15879.10094 | -15884.01077 | -15885.20058 | -15884.51408 | -15885.70511 | -15885.09313 | -15886.28168 | -15889.41100 | -15889.41100 |
| 2.65     | -15878.57277 | -15879.30742 | -15884.21624 | -15885.40568 | -15884.72038 | -15885.91098 | -15885.29960 | -15886.48774 | -15889.61485 | -15889.61485 |
| 2.74     | -15878.72934 | -15879.47558 | -15884.38400 | -15885.57315 | -15884.88891 | -15886.07917 | -15885.46822 | -15886.65600 | -15889.78130 | -15889.78130 |
| 2.83     | -15878.86998 | -15879.61328 | -15884.52171 | -15885.71066 | -15885.02733 | -15886.21735 | -15885.60665 | -15886.79415 | -15889.91794 | -15889.91794 |
| 2.93     | -15878.96902 | -15879.72651 | -15884.63526 | -15885.82412 | -15885.14154 | -15886.33145 | -15885.72079 | -15886.90811 | -15890.03062 | -15890.03062 |
| 3.02     | -15879.06069 | -15879.81965 | -15884.72881 | -15885.91768 | -15885.23572 | -15886.42562 | -15885.81484 | -15887.00207 | -15890.12346 | -15890.12346 |
| 3.12     | -15879.15296 | -15879.89590 | -15884.80523 | -15885.99407 | -15885.31276 | -15886.50259 | -15885.89175 | -15887.07892 | -15890.19931 | -15890.19931 |
| 3.21     | -15879.21649 | -15879.95812 | -15884.86738 | -15886.05608 | -15885.37551 | -15886.56515 | -15885.95439 | -15887.14144 | -15890.26091 | -15890.26091 |
| 3.31     | -15879.26880 | -15880.00888 | -15884.91800 | -15886.10654 | -15885.42670 | -15886.61612 | -15886.00546 | -15887.19239 | -15890.31094 | -15890.31094 |
| 3.40     | -15879.31161 | -15880.05017 | -15884.95926 | -15886.14765 | -15885.46847 | -15886.65771 | -15886.04714 | -15887.23395 | -15890.35157 | -15890.35157 |
| 3.50     | -15879.34632 | -15880.08350 | -15884.99267 | -15886.18091 | -15885.50234 | -15886.69143 | -15886.08095 | -15887.26765 | -15890.38434 | -15890.38434 |
| 3.59     | -15879.37414 | -15880.11007 | -15885.01939 | -15886.20752 | -15885.52951 | -15886.71846 | -15886.10809 | -15887.29469 | -15890.41046 | -15890.41046 |
| 3.68     | -15879.39606 | -15880.13089 | -15885.04047 | -15886.22850 | -15885.55099 | -15886.73985 | -15886.12960 | -15887.31610 | -15890.43097 | -15890.43097 |
| 3.78     | -15879.41298 | -15880.14680 | -15885.05670 | -15886.24464 | -15885.56759 | -15886.75637 | -15886.14627 | -15887.33268 | -15890.44666 | -15890.44666 |
| 3.87     | -15879.42565 | -15880.15856 | -15885.06882 | -15886.25668 | -15885.58005 | -15886.76878 | -15886.15884 | -15887.34516 | -15890.45829 | -15890.45829 |
| 3.97     | -15879.43475 | -15880.16682 | -15885.07749 | -15886.26529 | -15885.58904 | -15886.77773 | -15886.16799 | -15887.35422 | -15890.46651 | -15890.46651 |
| 4.06     | -15879.42484 | -15880.17212 | -15885.08322 | -15886.27097 | -15885.59506 | -15886.78374 | -15886.17421 | -15887.36036 | -15890.47181 | -15890.47181 |
| 4.16     | -15879.43123 | -15880.17483 | -15885.08780 | -15886.27256 | -15885.60108 | -15886.78826 | -15886.17845 | -15887.35888 | -15890.47866 | -15890.47866 |
| 4.25     | -15879.44596 | -15880.17827 | -15885.09165 | -15886.27657 | -15885.60528 | -15886.79286 | -15886.18334 | -15887.36347 | -15890.48163 | -15890.48163 |
| 4.35     | -15879.44581 | -15880.17765 | -15885.09118 | -15886.27620 | -15885.60495 | -15886.79279 | -15886.18337 | -15887.36337 | -15890.48073 | -15890.48073 |
| 4.44     | -15879.44432 | -15880.17587 | -15885.08951 | -15886.27468 | -15885.60341 | -15886.79156 | -15886.18220 | -15887.36207 | -15890.47864 | -15890.47864 |
| 4.54     | -15879.44176 | -15880.17318 | -15885.08688 | -15886.27221 | -15885.60090 | -15886.78941 | -15886.18005 | -15887.35980 | -15890.47559 | -15890.47559 |
| 4.63     | -15879.43836 | -15880.16977 | -15885.08346 | -15886.26899 | -15885.59759 | -15886.78650 | -15886.17709 | -15887.35672 | -15890.47174 | -15890.47174 |
| 4.72     | -15879.43432 | -15880.16580 | -15885.07941 | -15886.26515 | -15885.59365 | -15886.78298 | -15886.17348 | -15887.35299 | -15890.46726 | -15890.46726 |
| 4.82     | -15879.42981 | -15880.16144 | -15885.07491 | -15886.26085 | -15885.58924 | -15886.77901 | -15886.16937 | -15887.34876 | -15890.46232 | -15890.46232 |
| 4.91     | -15879.42497 | -15880.15679 | -15885.07005 | -15886.25619 | -15885.58447 | -15886.77467 | -15886.16488 | -15887.34414 | -15890.45703 | -15890.45703 |
| 5.01     | -15879.41993 | -15880.15200 | -15885.06500 | -15886.25129 | -15885.57950 | -15886.77009 | -15886.16017 | -15887.33927 | -15890.45155 | -15890.45155 |
| 5.10     | -15879.41479 | -15880.14720 | -15885.05991 | -15886.24632 | -15885.57450 | -15886.76542 | -15886.15542 | -15887.33432 | -15890.44606 | -15890.44606 |
| 5.20     | -15879.40962 | -15880.14246 | -15885.05493 | -15886.24142 | -15885.56959 | -15886.76081 | -15886.15075 | -15887.32945 | -15890.44070 | -15890.44070 |
| 5.29     | -15879.40449 | -15880.13781 | -15885.05009 | -15886.23665 | -15885.56484 | -15886.75630 | -15886.14622 | -15887.32472 | -15890.43555 | -15890.43555 |
| 5.39     | -15879.39946 | -15880.13328 | -15885.04542 | -15886.23202 | -15885.56026 | -15886.75191 | -15886.14186 | -15887.32017 | -15890.43063 | -15890.43063 |
| 5.48     | -15879.39458 | -15880.12888 | -15885.04094 | -15886.22755 | -15885.55587 | -15886.74767 | -15886.13769 | -15887.31581 | -15890.42597 | -15890.42597 |
| 5.57     | -15879.38989 | -15880.12465 | -15885.03667 | -15886.22328 | -15885.55170 | -15886.74360 | -15886.13376 | -15887.31168 | -15890.42159 | -15890.42159 |
| 5.67     | -15879.38544 | -15880.12058 | -15885.03264 | -15886.21922 | -15885.54776 | -15886.73971 | -15886.13007 | -15887.30780 | -15890.41750 | -15890.41750 |
| 5.76     | -15879.39808 | -15880.11669 | -15885.02884 | -15886.21537 | -15885.54406 | -15886.73602 | -15886.12663 | -15887.30417 | -15890.41371 | -15890.41371 |
| 5.86     | -15879.39669 | -15880.11298 | -15885.02528 | -15886.21174 | -15885.54058 | -15886.73253 | -15886.12345 | -15887.30079 | -15890.41019 | -15890.41019 |
| 5.95     | -15879.39540 | -15880.10946 | -15885.02193 | -15886.20832 | -15885.53733 | -15886.72922 | -15886.12050 | -15887.29765 | -15890.40693 | -15890.40693 |
| 6.05     | -15879.39422 | -15880.10613 | -15885.01882 | -15886.20512 | -15885.53431 | -15886.72612 | -15886.11781 | -15887.29478 | -15890.40395 | -15890.40395 |
| 6.14     | -15879.39316 | -15880.10299 | -15885.01591 | -15886.20213 | -15885.53150 | -15886.72321 | -15886.11535 | -15887.29215 | -15890.40123 | -15890.40123 |
| 6.24     | -15879.39223 | -15880.10003 | -15885.01323 | -15886.19936 | -15885.52890 | -15886.72050 | -15886.11313 | -15887.28977 | -15890.39875 | -15890.39875 |
| 6.33     | -15879.39144 | -15880.09727 | -15885.01075 | -15886.19680 | -15885.52650 | -15886.71798 | -15886.11114 | -15887.28765 | -15890.39651 | -15890.39651 |
| 6.43     | -15879.39078 | -15880.09469 | -15885.00844 | -15886.19441 | -15885.52427 | -15886.71562 | -15886.10935 | -15887.28574 | -15890.39447 | -15890.39447 |
| 6.52     | -15879.39024 | -15880.09231 | -15885.00631 | -15886.19220 | -15885.52222 | -15886.71344 | -15886.10775 | -15887.28405 | -15890.39263 | -15890.39263 |
| 6.61     | -15879.38981 | -15880.09010 | -15885.00433 | -15886.19017 | -15885.52032 | -15886.71141 | -15886.10632 | -15887.28255 | -15890.39098 | -15890.39098 |
| 6.71     | -15879.38948 | -15880.08806 | -15885.00250 | -15886.18828 | -15885.51857 | -15886.70953 | -15886.10505 | -15887.28123 | -15890.38948 | -15890.38948 |
| 6.80     | -15879.38924 | -15880.08612 | -15885.00083 | -15886.18655 | -15885.51696 | -15886.70780 | -15886.10392 | -15887.28007 | -15890.38813 | -15890.38813 |
| 6.90     | -15879.38907 | -15880.08437 | -15884.99931 | -15886.18498 | -15885.51551 | -15886.70623 | -15886.10295 | -15887.27906 | -15890.38691 | -15890.38691 |
| 6.99     | -15879.38897 | -15880.08283 | -15884.99779 | -15886.18344 | -15885.51407 | -15886.70468 | -15886.10198 | -15887.27810 | -15890.38575 | -15890.38575 |



Table S22: The absolute energies in hartree of the potential energy curve of TaSi in the  $^2\Delta$  state with a CASSCF wave function and nom-CPO active space.

| Distance | CASSCF       | CASPT2       | tpbe         | ftpbe        | trevpbe      | ftrevpbe     | tblyp        | ftblyp       | torelyp      | ftorelyp     |
|----------|--------------|--------------|--------------|--------------|--------------|--------------|--------------|--------------|--------------|--------------|
| 7.09     | -15879.38891 | -15880.08143 | -15884.99636 | -15886.18198 | -15885.51271 | -15886.70323 | -15886.10106 | -15887.27722 | -15890.38468 | -15891.38468 |
| 7.18     | -15879.38890 | -15880.08015 | -15884.99501 | -15886.18061 | -15885.51143 | -15886.70187 | -15886.10020 | -15887.27640 | -15890.38370 | -15891.38370 |
| 7.28     | -15879.38892 | -15880.07900 | -15884.99374 | -15886.17932 | -15885.51024 | -15886.70060 | -15886.09940 | -15887.27564 | -15890.38279 | -15891.38279 |
| 7.37     | -15879.38897 | -15880.07795 | -15884.99255 | -15886.17812 | -15885.50913 | -15886.69942 | -15886.09864 | -15887.27492 | -15890.38195 | -15891.38195 |
| 7.46     | -15879.38903 | -15880.07699 | -15884.99144 | -15886.17699 | -15885.50810 | -15886.69833 | -15886.09792 | -15887.27426 | -15890.38118 | -15891.38118 |
| 7.56     | -15879.38911 | -15880.07611 | -15884.99041 | -15886.17595 | -15885.50714 | -15886.69732 | -15886.09726 | -15887.27364 | -15890.38047 | -15891.38047 |
| 7.65     | -15879.38920 | -15880.07530 | -15884.98945 | -15886.17498 | -15885.50626 | -15886.69639 | -15886.09663 | -15887.27306 | -15890.37984 | -15891.37984 |
| 7.75     | -15879.38930 | -15880.07456 | -15884.98858 | -15886.17410 | -15885.50547 | -15886.69555 | -15886.09606 | -15887.27253 | -15890.37927 | -15891.37927 |
| 7.84     | -15879.38940 | -15880.07388 | -15884.98778 | -15886.17328 | -15885.50474 | -15886.69478 | -15886.09554 | -15887.27204 | -15890.37876 | -15891.37876 |
| 7.94     | -15879.38951 | -15880.07325 | -15884.98705 | -15886.17254 | -15885.50408 | -15886.69408 | -15886.09506 | -15887.27159 | -15890.37831 | -15891.37831 |
| 8.03     | -15879.38961 | -15880.07266 | -15884.98637 | -15886.17186 | -15885.50349 | -15886.69345 | -15886.09461 | -15887.27118 | -15890.37791 | -15891.37791 |
| 8.13     | -15879.38972 | -15880.07211 | -15884.98577 | -15886.17125 | -15885.50296 | -15886.69289 | -15886.09422 | -15887.27081 | -15890.37757 | -15891.37757 |
| 8.22     | -15879.38982 | -15880.07158 | -15884.98522 | -15886.17069 | -15885.50248 | -15886.69238 | -15886.09385 | -15887.27047 | -15890.37726 | -15891.37726 |
| 8.31     | -15879.38991 | -15880.07108 | -15884.98472 | -15886.17018 | -15885.50204 | -15886.69192 | -15886.09352 | -15887.27015 | -15890.37700 | -15891.37700 |
| 8.41     | -15879.39001 | -15880.07062 | -15884.98427 | -15886.16973 | -15885.50167 | -15886.69152 | -15886.09323 | -15887.26988 | -15890.37678 | -15891.37678 |
| 8.50     | -15879.39010 | -15880.07018 | -15884.98387 | -15886.16931 | -15885.50133 | -15886.69116 | -15886.09297 | -15887.26964 | -15890.37659 | -15891.37659 |
| 8.60     | -15879.39018 | -15880.06978 | -15884.98350 | -15886.16894 | -15885.50103 | -15886.69083 | -15886.09273 | -15887.26941 | -15890.37643 | -15891.37643 |
| 8.69     | -15879.39027 | -15880.06942 | -15884.98319 | -15886.16861 | -15885.50077 | -15886.69055 | -15886.09253 | -15887.26922 | -15890.37630 | -15891.37630 |
| 8.79     | -15879.39034 | -15880.06908 | -15884.98289 | -15886.16831 | -15885.50054 | -15886.69030 | -15886.09235 | -15887.26904 | -15890.37619 | -15891.37619 |
| 8.88     | -15879.39041 | -15880.06878 | -15884.98263 | -15886.16804 | -15885.50034 | -15886.69008 | -15886.09219 | -15887.26888 | -15890.37611 | -15891.37611 |
| 8.98     | -15879.39048 | -15880.06850 | -15884.98240 | -15886.16780 | -15885.50016 | -15886.68988 | -15886.09204 | -15887.26875 | -15890.37603 | -15891.37603 |
| 9.07     | -15879.39054 | -15880.06825 | -15884.98219 | -15886.16758 | -15885.50000 | -15886.68971 | -15886.09192 | -15887.26862 | -15890.37598 | -15891.37598 |
| 9.17     | -15879.39060 | -15880.06802 | -15884.98201 | -15886.16739 | -15885.49987 | -15886.68956 | -15886.09181 | -15887.26852 | -15890.37594 | -15891.37594 |
| 9.26     | -15879.39066 | -15880.06781 | -15884.98184 | -15886.16722 | -15885.49975 | -15886.68943 | -15886.09171 | -15887.26843 | -15890.37592 | -15891.37592 |
| 9.35     | -15879.39071 | -15880.06763 | -15884.98169 | -15886.16706 | -15885.49965 | -15886.68931 | -15886.09163 | -15887.26834 | -15890.37590 | -15891.37590 |
| 9.45     | -15879.39076 | -15880.06746 | -15884.98156 | -15886.16692 | -15885.49956 | -15886.68921 | -15886.09156 | -15887.26827 | -15890.37588 | -15891.37588 |
| 9.54     | -15879.39080 | -15880.06730 | -15884.98144 | -15886.16680 | -15885.49948 | -15886.68912 | -15886.09150 | -15887.26821 | -15890.37588 | -15891.37588 |
| 9.64     | -15879.39084 | -15880.06716 | -15884.98133 | -15886.16668 | -15885.49941 | -15886.68904 | -15886.09144 | -15887.26815 | -15890.37588 | -15891.37588 |
| 9.73     | -15879.39088 | -15880.06704 | -15884.98124 | -15886.16658 | -15885.49936 | -15886.68897 | -15886.09140 | -15887.26811 | -15890.37589 | -15891.37589 |
| 9.83     | -15879.39091 | -15880.06692 | -15884.98116 | -15886.16650 | -15885.49932 | -15886.68892 | -15886.09137 | -15887.26808 | -15890.37590 | -15891.37590 |
| 9.92     | -15879.39094 | -15880.06682 | -15884.98108 | -15886.16642 | -15885.49928 | -15886.68887 | -15886.09134 | -15887.26805 | -15890.37591 | -15891.37591 |
| 10.02    | -15879.39097 | -15880.06672 | -15884.98102 | -15886.16635 | -15885.49925 | -15886.68883 | -15886.09132 | -15887.26802 | -15890.37593 | -15891.37593 |
| 10.11    | -15879.39100 | -15880.06663 | -15884.98096 | -15886.16629 | -15885.49922 | -15886.68879 | -15886.09130 | -15887.26800 | -15890.37595 | -15891.37595 |
| 10.20    | -15879.39102 | -15880.06655 | -15884.98091 | -15886.16623 | -15885.49919 | -15886.68876 | -15886.09128 | -15887.26798 | -15890.37596 | -15891.37596 |
| 10.30    | -15879.39104 | -15880.06648 | -15884.98086 | -15886.16618 | -15885.49917 | -15886.68873 | -15886.09127 | -15887.26797 | -15890.37598 | -15891.37598 |
| 10.39    | -15879.39106 | -15880.06641 | -15884.98082 | -15886.16613 | -15885.49916 | -15886.68870 | -15886.09126 | -15887.26796 | -15890.37600 | -15891.37600 |
| 10.49    | -15879.39108 | -15880.06634 | -15884.98078 | -15886.16609 | -15885.49914 | -15886.68868 | -15886.09126 | -15887.26795 | -15890.37602 | -15891.37602 |
| 10.58    | -15879.39110 | -15880.06629 | -15884.98075 | -15886.16605 | -15885.49913 | -15886.68866 | -15886.09125 | -15887.26795 | -15890.37603 | -15891.37603 |
| 10.68    | -15879.39111 | -15880.06623 | -15884.98072 | -15886.16601 | -15885.49912 | -15886.68865 | -15886.09125 | -15887.26794 | -15890.37605 | -15891.37605 |
| 10.77    | -15879.39113 | -15880.06618 | -15884.98069 | -15886.16599 | -15885.49911 | -15886.68864 | -15886.09126 | -15887.26794 | -15890.37607 | -15891.37607 |
| 10.87    | -15879.39114 | -15880.06614 | -15884.98067 | -15886.16596 | -15885.49911 | -15886.68863 | -15886.09126 | -15887.26795 | -15890.37609 | -15891.37609 |
| 10.96    | -15879.39115 | -15880.06609 | -15884.98064 | -15886.16593 | -15885.49910 | -15886.68861 | -15886.09126 | -15887.26794 | -15890.37610 | -15891.37610 |
| 11.05    | -15879.39116 | -15880.06606 | -15884.98063 | -15886.16592 | -15885.49910 | -15886.68861 | -15886.09127 | -15887.26795 | -15890.37612 | -15891.37612 |
| 11.15    | -15879.39117 | -15880.06602 | -15884.98061 | -15886.16589 | -15885.49910 | -15886.68860 | -15886.09127 | -15887.26795 | -15890.37613 | -15891.37613 |
| 11.24    | -15879.39118 | -15880.06598 | -15884.98059 | -15886.16588 | -15885.49909 | -15886.68859 | -15886.09128 | -15887.26796 | -15890.37614 | -15891.37614 |
| 11.34    | -15879.39119 | -15880.06595 | -15884.98058 | -15886.16586 | -15885.49909 | -15886.68859 | -15886.09129 | -15887.26796 | -15890.37615 | -15891.37615 |
| 11.43    | -15879.39119 | -15880.06592 | -15884.98056 | -15886.16584 | -15885.49909 | -15886.68858 | -15886.09129 | -15887.26797 | -15890.37616 | -15891.37616 |
| 11.53    | -15879.39120 | -15880.06590 | -15884.98055 | -15886.16583 | -15885.49909 | -15886.68858 | -15886.09130 | -15887.26798 | -15890.37617 | -15891.37617 |
| 11.62    | -15879.39121 | -15880.06587 | -15884.98054 | -15886.16581 | -15885.49909 | -15886.68857 | -15886.09131 | -15887.26798 | -15890.37618 | -15891.37618 |
| 11.72    | -15879.39121 | -15880.06585 | -15884.98053 | -15886.16580 | -15885.49909 | -15886.68857 | -15886.09132 | -15887.26799 | -15890.37618 | -15891.37618 |
| 11.81    | -15879.39122 | -15880.06583 | -15884.98052 | -15886.16579 | -15885.49909 | -15886.68857 | -15886.09133 | -15887.26800 | -15890.37619 | -15891.37619 |
| 11.91    | -15879.39122 | -15880.06581 | -15884.98052 | -15886.16579 | -15885.49909 | -15886.68856 | -15886.09134 | -15887.26801 | -15890.37620 | -15891.37620 |



Table S22: The absolute energies in hartree of the potential energy curve of TaSi in the  $^2\Delta$  state with a CASSCF wave function and nom-CPO active space.

| Distance | CASSCF       | CASPT2       | tpbe         | ftpbe        | trevpbe      | ftrevpbe     | tblyp        | ftblyp       | torelyp      | ftorelyp     |
|----------|--------------|--------------|--------------|--------------|--------------|--------------|--------------|--------------|--------------|--------------|
| 16.91    | -15879.39125 | -15880.06517 | -15884.98044 | -15886.16569 | -15885.49908 | -15886.68853 | -15886.09154 | -15887.26820 | -15890.37623 | -15891.56667 |
| 17.01    | -15879.39125 | -15880.06517 | -15884.98044 | -15886.16569 | -15885.49908 | -15886.68853 | -15886.09154 | -15887.26820 | -15890.37623 | -15891.56667 |
| 17.10    | -15879.39125 | -15880.06517 | -15884.98044 | -15886.16569 | -15885.49908 | -15886.68853 | -15886.09154 | -15887.26820 | -15890.37623 | -15891.56667 |
| 17.20    | -15879.39125 | -15880.06516 | -15884.98044 | -15886.16569 | -15885.49908 | -15886.68853 | -15886.09154 | -15887.26820 | -15890.37623 | -15891.56667 |
| 17.29    | -15879.39125 | -15880.06516 | -15884.98044 | -15886.16569 | -15885.49908 | -15886.68853 | -15886.09154 | -15887.26820 | -15890.37623 | -15891.56667 |
| 17.39    | -15879.39125 | -15880.06516 | -15884.98044 | -15886.16569 | -15885.49908 | -15886.68853 | -15886.09154 | -15887.26820 | -15890.37623 | -15891.56667 |
| 17.48    | -15879.39125 | -15880.06516 | -15884.98044 | -15886.16569 | -15885.49908 | -15886.68853 | -15886.09154 | -15887.26820 | -15890.37623 | -15891.56667 |
| 17.57    | -15879.39125 | -15880.06515 | -15884.98044 | -15886.16569 | -15885.49908 | -15886.68853 | -15886.09154 | -15887.26820 | -15890.37623 | -15891.56667 |
| 17.67    | -15879.39125 | -15880.06515 | -15884.98044 | -15886.16569 | -15885.49908 | -15886.68853 | -15886.09155 | -15887.26820 | -15890.37623 | -15891.56667 |
| 17.76    | -15879.39125 | -15880.06515 | -15884.98044 | -15886.16569 | -15885.49908 | -15886.68853 | -15886.09155 | -15887.26820 | -15890.37623 | -15891.56667 |
| 17.86    | -15879.39125 | -15880.06514 | -15884.98044 | -15886.16570 | -15885.49908 | -15886.68853 | -15886.09155 | -15887.26821 | -15890.37623 | -15891.56667 |
| 17.95    | -15879.39125 | -15880.06513 | -15884.98044 | -15886.16569 | -15885.49908 | -15886.68853 | -15886.09155 | -15887.26820 | -15890.37623 | -15891.56667 |
| 18.05    | -15879.39125 | -15880.06513 | -15884.98044 | -15886.16570 | -15885.49908 | -15886.68853 | -15886.09155 | -15887.26821 | -15890.37623 | -15891.56667 |

Table S23: The absolute energies in hartree of the potential energy curve of TaSi in the  $^4\Pi$  state with a SP-based wave function and nom-CPO active space.

| Distance | SP           | tpbe         | ftpbe        | trevpbe      | ftrevpbe     | tblyp        | ftblyp       | torelyp      | ftorelyp     |
|----------|--------------|--------------|--------------|--------------|--------------|--------------|--------------|--------------|--------------|
| 1.98     | -15875.60681 | -15881.34485 | -15882.53475 | -15881.84361 | -15883.03563 | -15882.41154 | -15883.59737 | -15886.77544 | -15888.06986 |
| 2.08     | -15876.32142 | -15882.05372 | -15883.24327 | -15882.55393 | -15883.74553 | -15883.12359 | -15884.30908 | -15887.47968 | -15888.77379 |
| 2.17     | -15876.89473 | -15882.61542 | -15883.80324 | -15883.11682 | -15884.30579 | -15883.69020 | -15884.87469 | -15888.03906 | -15889.33029 |
| 2.27     | -15877.35380 | -15883.06522 | -15884.25151 | -15883.56786 | -15884.75489 | -15884.14221 | -15885.32559 | -15888.48552 | -15889.77479 |
| 2.36     | -15877.71977 | -15883.42577 | -15884.61174 | -15883.92952 | -15885.11626 | -15884.50415 | -15885.68717 | -15888.84282 | -15890.13172 |
| 2.46     | -15878.01249 | -15883.71438 | -15884.90017 | -15884.21916 | -15885.40578 | -15884.79379 | -15885.97645 | -15889.12871 | -15890.41737 |
| 2.55     | -15878.24810 | -15883.94639 | -15885.13205 | -15884.45206 | -15885.63865 | -15885.02669 | -15886.20896 | -15889.35836 | -15890.64689 |
| 2.65     | -15878.44819 | -15884.13851 | -15885.32544 | -15884.64395 | -15885.83247 | -15885.22162 | -15886.40574 | -15889.54287 | -15890.83429 |
| 2.74     | -15878.61751 | -15884.30677 | -15885.49361 | -15884.81295 | -15886.00131 | -15885.39103 | -15886.57501 | -15889.71009 | -15891.00116 |
| 2.83     | -15878.75764 | -15884.44590 | -15885.63263 | -15884.95279 | -15886.14094 | -15885.53116 | -15886.71504 | -15889.84849 | -15891.13916 |
| 2.93     | -15878.87449 | -15884.56129 | -15885.74789 | -15885.06888 | -15886.25677 | -15885.64744 | -15886.83121 | -15889.96341 | -15891.25361 |
| 3.02     | -15878.97271 | -15884.65738 | -15885.84381 | -15885.16566 | -15886.35325 | -15885.74431 | -15886.92796 | -15890.05917 | -15891.34891 |
| 3.12     | -15879.06119 | -15884.74119 | -15885.92798 | -15885.25054 | -15886.44046 | -15885.82588 | -15887.00743 | -15890.14105 | -15891.43462 |
| 3.21     | -15879.13610 | -15884.81457 | -15886.00099 | -15885.32438 | -15886.51416 | -15885.89937 | -15887.08051 | -15890.21309 | -15891.50662 |
| 3.31     | -15879.19903 | -15884.87583 | -15886.06198 | -15885.38608 | -15886.57566 | -15885.96094 | -15887.14182 | -15890.27328 | -15891.56667 |
| 3.40     | -15879.25155 | -15884.92664 | -15886.11257 | -15885.43730 | -15886.62671 | -15886.01215 | -15887.19279 | -15890.32321 | -15891.61646 |
| 3.50     | -15879.29509 | -15884.96851 | -15886.15427 | -15885.47956 | -15886.66882 | -15886.05445 | -15887.23489 | -15890.36432 | -15891.65745 |
| 3.59     | -15879.33093 | -15885.00266 | -15886.18826 | -15885.51409 | -15886.70320 | -15886.08905 | -15887.26931 | -15890.39779 | -15891.69082 |
| 3.68     | -15879.36015 | -15885.03024 | -15886.21569 | -15885.54202 | -15886.73101 | -15886.11709 | -15887.29717 | -15890.42478 | -15891.71771 |
| 3.78     | -15879.38370 | -15885.05232 | -15886.23764 | -15885.56443 | -15886.75331 | -15886.13964 | -15887.31954 | -15890.44634 | -15891.73919 |
| 3.87     | -15879.40241 | -15885.06969 | -15886.25490 | -15885.58212 | -15886.77089 | -15886.15749 | -15887.33723 | -15890.46325 | -15891.75602 |
| 3.97     | -15879.41699 | -15885.08301 | -15886.26812 | -15885.59574 | -15886.78442 | -15886.17130 | -15887.35087 | -15890.47617 | -15891.76887 |
| 4.06     | -15879.42807 | -15885.09294 | -15886.27796 | -15885.60594 | -15886.79455 | -15886.18171 | -15887.36113 | -15890.48575 | -15891.77838 |
| 4.16     | -15879.43620 | -15885.10006 | -15886.28500 | -15885.61333 | -15886.80187 | -15886.18933 | -15887.36858 | -15890.49256 | -15891.78515 |
| 4.35     | -15879.44185 | -15885.10481 | -15886.28968 | -15885.61832 | -15886.80680 | -15886.19459 | -15887.37367 | -15890.49706 | -15891.78960 |
| 4.44     | -15879.44542 | -15885.10752 | -15886.29232 | -15885.62126 | -15886.80969 | -15886.19780 | -15887.37672 | -15890.49955 | -15891.79205 |
| 4.54     | -15879.44727 | -15885.10853 | -15886.29327 | -15885.62248 | -15886.81087 | -15886.19932 | -15887.37806 | -15890.50038 | -15891.79284 |
| 4.63     | -15879.44770 | -15885.10817 | -15886.29286 | -15885.62232 | -15886.81068 | -15886.19946 | -15887.37803 | -15890.49987 | -15891.79230 |
| 4.72     | -15879.44697 | -15885.10673 | -15886.29137 | -15885.62107 | -15886.80941 | -15886.19852 | -15887.37690 | -15890.49828 | -15891.79070 |
| 4.82     | -15879.44532 | -15885.10438 | -15886.28898 | -15885.61889 | -15886.80723 | -15886.19666 | -15887.37485 | -15890.49579 | -15891.78821 |
| 4.91     | -15879.44292 | -15885.10127 | -15886.28583 | -15885.61594 | -15886.80430 | -15886.19403 | -15887.37201 | -15890.49254 | -15891.78498 |
| 5.01     | -15879.43997 | -15885.09757 | -15886.28211 | -15885.61239 | -15886.80078 | -15886.19079 | -15887.36857 | -15890.48870 | -15891.78118 |
| 5.10     | -15879.43659 | -15885.09342 | -15886.27795 | -15885.60838 | -15886.79684 | -15886.18708 | -15887.36465 | -15890.48440 | -15891.77694 |

Table S23: The absolute energies in hartree of the potential energy curve of TaSi in the  $^4\Pi$  state with a SP-based wave function and nom-CPO active space.

| Distance | SP           | tpbe         | ftpbe        | trevpbe      | ftrevpbe     | tblyp        | ftblyp       | torelyp      | ftorelyp     |
|----------|--------------|--------------|--------------|--------------|--------------|--------------|--------------|--------------|--------------|
| 5.20     | -15879.43292 | -15885.08895 | -15886.27348 | -15885.60404 | -15886.79258 | -15886.18302 | -15887.36037 | -15890.47977 | -15891.77240 |
| 5.29     | -15879.42906 | -15885.08420 | -15886.26874 | -15885.59942 | -15886.78808 | -15886.17866 | -15887.35579 | -15890.47484 | -15891.76758 |
| 5.39     | -15879.42512 | -15885.07921 | -15886.26378 | -15885.59455 | -15886.78335 | -15886.17402 | -15887.35093 | -15890.46964 | -15891.76253 |
| 5.48     | -15879.42116 | -15885.07402 | -15886.25864 | -15885.58948 | -15886.77846 | -15886.16913 | -15887.34584 | -15890.46421 | -15891.75727 |
| 5.57     | -15879.41726 | -15885.06866 | -15886.25337 | -15885.58426 | -15886.77344 | -15886.16404 | -15887.34056 | -15890.45861 | -15891.75187 |
| 5.67     | -15879.41347 | -15885.06318 | -15886.24799 | -15885.57890 | -15886.76833 | -15886.15877 | -15887.33514 | -15890.45286 | -15891.74636 |
| 5.76     | -15879.40983 | -15885.05759 | -15886.24254 | -15885.57346 | -15886.76316 | -15886.15337 | -15887.32963 | -15890.44703 | -15891.74079 |
| 5.86     | -15879.40638 | -15885.05194 | -15886.23703 | -15885.56796 | -15886.75796 | -15886.14788 | -15887.32406 | -15890.44117 | -15891.73519 |
| 5.95     | -15879.40313 | -15885.04628 | -15886.23152 | -15885.56248 | -15886.75271 | -15886.14240 | -15887.31854 | -15890.43540 | -15891.72965 |
| 6.05     | -15879.40009 | -15885.04080 | -15886.22619 | -15885.55715 | -15886.74762 | -15886.13712 | -15887.31326 | -15890.42986 | -15891.72436 |
| 6.14     | -15879.39725 | -15885.03571 | -15886.22121 | -15885.55219 | -15886.74285 | -15886.13228 | -15887.30842 | -15890.42482 | -15891.71953 |
| 6.24     | -15879.39457 | -15885.03111 | -15886.21671 | -15885.54774 | -15886.73855 | -15886.12798 | -15887.30416 | -15890.42038 | -15891.71527 |
| 6.33     | -15879.39204 | -15885.02714 | -15886.21282 | -15885.54390 | -15886.73481 | -15886.12434 | -15887.30055 | -15890.41662 | -15891.71164 |
| 6.43     | -15879.38964 | -15885.02376 | -15886.20949 | -15885.54064 | -15886.73160 | -15886.12134 | -15887.29758 | -15890.41349 | -15891.70861 |
| 6.52     | -15879.38736 | -15885.02082 | -15886.20659 | -15885.53781 | -15886.72880 | -15886.11882 | -15887.29509 | -15890.41084 | -15891.70602 |
| 6.61     | -15879.38520 | -15885.01822 | -15886.20403 | -15885.53532 | -15886.72632 | -15886.11667 | -15887.29298 | -15890.40855 | -15891.70378 |
| 6.71     | -15879.38315 | -15885.01591 | -15886.20174 | -15885.53310 | -15886.72409 | -15886.11482 | -15887.29119 | -15890.40658 | -15891.70183 |
| 6.80     | -15879.38123 | -15885.01384 | -15886.19970 | -15885.53112 | -15886.72210 | -15886.11325 | -15887.28969 | -15890.40488 | -15891.70014 |
| 6.90     | -15879.37943 | -15885.01197 | -15886.19786 | -15885.52935 | -15886.72030 | -15886.11189 | -15887.28842 | -15890.40341 | -15891.69866 |
| 6.99     | -15879.37776 | -15885.01028 | -15886.19620 | -15885.52775 | -15886.71866 | -15886.11072 | -15887.28735 | -15890.40212 | -15891.69737 |
| 7.09     | -15879.37622 | -15885.00872 | -15886.19467 | -15885.52628 | -15886.71716 | -15886.10969 | -15887.28643 | -15890.40099 | -15891.69621 |
| 7.18     | -15879.37480 | -15885.00728 | -15886.19326 | -15885.52493 | -15886.71576 | -15886.10878 | -15887.28564 | -15890.39998 | -15891.69517 |
| 7.28     | -15879.37352 | -15885.00593 | -15886.19193 | -15885.52366 | -15886.71445 | -15886.10794 | -15887.28493 | -15890.39905 | -15891.69420 |
| 7.37     | -15879.37236 | -15885.00463 | -15886.19066 | -15885.52246 | -15886.71320 | -15886.10715 | -15887.28427 | -15890.39819 | -15891.69330 |
| 7.46     | -15879.37132 | -15885.00340 | -15886.18944 | -15885.52131 | -15886.71201 | -15886.10639 | -15887.28364 | -15890.39738 | -15891.69244 |
| 7.56     | -15879.37039 | -15885.00221 | -15886.18828 | -15885.52021 | -15886.71087 | -15886.10566 | -15887.28304 | -15890.39661 | -15891.69162 |
| 7.65     | -15879.36957 | -15885.00108 | -15886.18716 | -15885.51916 | -15886.70977 | -15886.10494 | -15887.28244 | -15890.39587 | -15891.69083 |
| 7.75     | -15879.36885 | -15884.99999 | -15886.18609 | -15885.51816 | -15886.70873 | -15886.10424 | -15887.28186 | -15890.39517 | -15891.69007 |
| 7.84     | -15879.36821 | -15884.99897 | -15886.18507 | -15885.51721 | -15886.70775 | -15886.10357 | -15887.28129 | -15890.39451 | -15891.68935 |
| 7.94     | -15879.36766 | -15884.99801 | -15886.18412 | -15885.51634 | -15886.70684 | -15886.10294 | -15887.28075 | -15890.39389 | -15891.68868 |
| 8.03     | -15879.36717 | -15884.99710 | -15886.18322 | -15885.51551 | -15886.70598 | -15886.10233 | -15887.28022 | -15890.39332 | -15891.68805 |
| 8.13     | -15879.36674 | -15884.99619 | -15886.18232 | -15885.51469 | -15886.70512 | -15886.10170 | -15887.27968 | -15890.39275 | -15891.68741 |
| 8.22     | -15879.36638 | -15884.99542 | -15886.18154 | -15885.51399 | -15886.70438 | -15886.10116 | -15887.27920 | -15890.39227 | -15891.68687 |
| 8.31     | -15879.36606 | -15884.99479 | -15886.18090 | -15885.51344 | -15886.70380 | -15886.10073 | -15887.27881 | -15890.39189 | -15891.68645 |
| 8.41     | -15879.36578 | -15884.99423 | -15886.18034 | -15885.51295 | -15886.70329 | -15886.10036 | -15887.27846 | -15890.39157 | -15891.68609 |
| 8.50     | -15879.36552 | -15884.99374 | -15886.17984 | -15885.51253 | -15886.70284 | -15886.10003 | -15887.27815 | -15890.39131 | -15891.68579 |
| 8.60     | -15879.36529 | -15884.99330 | -15886.17939 | -15885.51215 | -15886.70245 | -15886.09973 | -15887.27788 | -15890.39108 | -15891.68552 |
| 8.69     | -15879.36508 | -15884.99289 | -15886.17898 | -15885.51182 | -15886.70209 | -15886.09946 | -15887.27762 | -15890.39089 | -15891.68529 |
| 8.79     | -15879.36489 | -15884.99253 | -15886.17861 | -15885.51152 | -15886.70177 | -15886.09922 | -15887.27740 | -15890.39072 | -15891.68509 |
| 8.88     | -15879.36472 | -15884.99221 | -15886.17828 | -15885.51126 | -15886.70149 | -15886.09902 | -15887.27720 | -15890.39059 | -15891.68492 |
| 8.98     | -15879.36456 | -15884.99193 | -15886.17799 | -15885.51103 | -15886.70125 | -15886.09884 | -15887.27703 | -15890.39048 | -15891.68479 |
| 9.07     | -15879.36442 | -15884.99167 | -15886.17773 | -15885.51083 | -15886.70103 | -15886.09868 | -15887.27687 | -15890.39039 | -15891.68467 |
| 9.17     | -15879.36429 | -15884.99144 | -15886.17748 | -15885.51066 | -15886.70084 | -15886.09853 | -15887.27673 | -15890.39033 | -15891.68458 |
| 9.26     | -15879.36417 | -15884.99124 | -15886.17727 | -15885.51051 | -15886.70067 | -15886.09841 | -15887.27661 | -15890.39028 | -15891.68450 |
| 9.35     | -15879.36407 | -15884.99106 | -15886.17708 | -15885.51037 | -15886.70052 | -15886.09830 | -15887.27650 | -15890.39024 | -15891.68443 |
| 9.45     | -15879.36397 | -15884.99090 | -15886.17691 | -15885.51026 | -15886.70040 | -15886.09821 | -15887.27641 | -15890.39022 | -15891.68438 |
| 9.54     | -15879.36388 | -15884.99075 | -15886.17676 | -15885.51016 | -15886.70028 | -15886.09813 | -15887.27632 | -15890.39020 | -15891.68434 |
| 9.64     | -15879.36379 | -15884.99062 | -15886.17662 | -15885.51008 | -15886.70018 | -15886.09806 | -15887.27625 | -15890.39020 | -15891.68431 |
| 9.73     | -15879.36372 | -15884.99050 | -15886.17649 | -15885.51000 | -15886.70009 | -15886.09800 | -15887.27619 | -15890.39019 | -15891.68429 |
| 9.83     | -15879.36365 | -15884.99040 | -15886.17638 | -15885.50994 | -15886.70001 | -15886.09795 | -15887.27613 | -15890.39020 | -15891.68427 |
| 9.92     | -15879.36358 | -15884.99030 | -15886.17627 | -15885.50988 | -15886.69994 | -15886.09790 | -15887.27608 | -15890.39020 | -15891.68426 |
| 10.02    | -15879.36353 | -15884.99021 | -15886.17618 | -15885.50983 | -15886.69988 | -15886.09786 | -15887.27604 | -15890.39021 | -15891.68425 |

Table S23: The absolute energies in hartree of the potential energy curve of TaSi in the  $^4\Pi$  state with a SP-based wave function and nom-CPO active space.

| Distance | SP           | tpbe         | ftpbe        | trevpbe      | ftrevpbe     | tblyp        | ftblyp       | torelyp      | ftorelyp     |
|----------|--------------|--------------|--------------|--------------|--------------|--------------|--------------|--------------|--------------|
| 10.11    | -15879.36347 | -15884.99014 | -15886.17610 | -15885.50979 | -15886.69983 | -15886.09783 | -15887.27601 | -15890.39023 | -15891.68425 |
| 10.20    | -15879.36342 | -15884.99007 | -15886.17602 | -15885.50975 | -15886.69978 | -15886.09781 | -15887.27598 | -15890.39024 | -15891.68425 |
| 10.30    | -15879.36337 | -15884.99001 | -15886.17596 | -15885.50972 | -15886.69975 | -15886.09778 | -15887.27595 | -15890.39026 | -15891.68425 |
| 10.39    | -15879.36333 | -15884.98996 | -15886.17590 | -15885.50970 | -15886.69972 | -15886.09777 | -15887.27593 | -15890.39028 | -15891.68426 |
| 10.49    | -15879.36329 | -15884.98991 | -15886.17585 | -15885.50968 | -15886.69969 | -15886.09776 | -15887.27592 | -15890.39031 | -15891.68427 |
| 10.58    | -15879.36326 | -15884.98987 | -15886.17580 | -15885.50967 | -15886.69967 | -15886.09775 | -15887.27591 | -15890.39033 | -15891.68427 |
| 10.68    | -15879.36322 | -15884.98983 | -15886.17576 | -15885.50965 | -15886.69965 | -15886.09774 | -15887.27590 | -15890.39035 | -15891.68428 |
| 10.77    | -15879.36319 | -15884.98980 | -15886.17572 | -15885.50964 | -15886.69963 | -15886.09774 | -15887.27589 | -15890.39037 | -15891.68429 |
| 10.87    | -15879.36316 | -15884.98976 | -15886.17568 | -15885.50963 | -15886.69961 | -15886.09774 | -15887.27588 | -15890.39039 | -15891.68429 |
| 10.96    | -15879.36313 | -15884.98973 | -15886.17565 | -15885.50962 | -15886.69959 | -15886.09773 | -15887.27588 | -15890.39040 | -15891.68430 |
| 11.05    | -15879.36311 | -15884.98970 | -15886.17561 | -15885.50961 | -15886.69957 | -15886.09774 | -15887.27587 | -15890.39042 | -15891.68430 |
| 11.15    | -15879.36308 | -15884.98968 | -15886.17558 | -15885.50960 | -15886.69955 | -15886.09774 | -15887.27587 | -15890.39043 | -15891.68431 |
| 11.24    | -15879.36306 | -15884.98966 | -15886.17555 | -15885.50960 | -15886.69954 | -15886.09774 | -15887.27587 | -15890.39045 | -15891.68431 |
| 11.34    | -15879.36304 | -15884.98963 | -15886.17553 | -15885.50959 | -15886.69953 | -15886.09774 | -15887.27587 | -15890.39046 | -15891.68432 |
| 11.43    | -15879.36302 | -15884.98962 | -15886.17551 | -15885.50959 | -15886.69952 | -15886.09775 | -15887.27587 | -15890.39047 | -15891.68432 |
| 11.53    | -15879.36301 | -15884.98960 | -15886.17549 | -15885.50959 | -15886.69951 | -15886.09775 | -15887.27588 | -15890.39048 | -15891.68433 |
| 11.62    | -15879.36299 | -15884.98959 | -15886.17547 | -15885.50958 | -15886.69951 | -15886.09776 | -15887.27588 | -15890.39050 | -15891.68433 |
| 11.72    | -15879.36297 | -15884.98958 | -15886.17546 | -15885.50958 | -15886.69951 | -15886.09777 | -15887.27589 | -15890.39051 | -15891.68434 |
| 11.81    | -15879.36296 | -15884.98956 | -15886.17545 | -15885.50958 | -15886.69950 | -15886.09778 | -15887.27589 | -15890.39051 | -15891.68434 |
| 11.91    | -15879.36295 | -15884.98956 | -15886.17544 | -15885.50958 | -15886.69950 | -15886.09778 | -15887.27590 | -15890.39053 | -15891.68434 |
| 12.00    | -15879.36293 | -15884.98955 | -15886.17543 | -15885.50958 | -15886.69950 | -15886.09779 | -15887.27591 | -15890.39053 | -15891.68435 |
| 12.09    | -15879.36292 | -15884.98954 | -15886.17542 | -15885.50958 | -15886.69949 | -15886.09780 | -15887.27592 | -15890.39054 | -15891.68435 |
| 12.19    | -15879.36291 | -15884.98952 | -15886.17540 | -15885.50958 | -15886.69948 | -15886.09781 | -15887.27592 | -15890.39054 | -15891.68434 |
| 12.28    | -15879.36290 | -15884.98952 | -15886.17539 | -15885.50958 | -15886.69948 | -15886.09781 | -15887.27592 | -15890.39055 | -15891.68434 |
| 12.38    | -15879.36289 | -15884.98951 | -15886.17538 | -15885.50957 | -15886.69947 | -15886.09782 | -15887.27593 | -15890.39055 | -15891.68434 |
| 12.47    | -15879.36288 | -15884.98950 | -15886.17537 | -15885.50957 | -15886.69946 | -15886.09783 | -15887.27593 | -15890.39056 | -15891.68434 |
| 12.57    | -15879.36287 | -15884.98949 | -15886.17536 | -15885.50957 | -15886.69946 | -15886.09783 | -15887.27594 | -15890.39056 | -15891.68434 |
| 12.66    | -15879.36287 | -15884.98949 | -15886.17535 | -15885.50957 | -15886.69946 | -15886.09784 | -15887.27594 | -15890.39056 | -15891.68434 |
| 12.76    | -15879.36286 | -15884.98948 | -15886.17534 | -15885.50957 | -15886.69945 | -15886.09785 | -15887.27595 | -15890.39056 | -15891.68433 |
| 12.85    | -15879.36285 | -15884.98947 | -15886.17534 | -15885.50956 | -15886.69945 | -15886.09785 | -15887.27595 | -15890.39056 | -15891.68433 |
| 12.94    | -15879.36284 | -15884.98947 | -15886.17533 | -15885.50956 | -15886.69945 | -15886.09786 | -15887.27596 | -15890.39056 | -15891.68433 |
| 13.04    | -15879.36284 | -15884.98947 | -15886.17533 | -15885.50956 | -15886.69945 | -15886.09787 | -15887.27596 | -15890.39056 | -15891.68433 |
| 13.13    | -15879.36283 | -15884.98947 | -15886.17533 | -15885.50956 | -15886.69945 | -15886.09787 | -15887.27597 | -15890.39056 | -15891.68433 |
| 13.23    | -15879.36283 | -15884.98946 | -15886.17533 | -15885.50956 | -15886.69945 | -15886.09788 | -15887.27598 | -15890.39056 | -15891.68433 |
| 13.32    | -15879.36282 | -15884.98946 | -15886.17532 | -15885.50956 | -15886.69944 | -15886.09789 | -15887.27599 | -15890.39057 | -15891.68433 |
| 13.42    | -15879.36282 | -15884.98946 | -15886.17532 | -15885.50956 | -15886.69944 | -15886.09789 | -15887.27599 | -15890.39057 | -15891.68433 |
| 13.51    | -15879.36281 | -15884.98946 | -15886.17532 | -15885.50956 | -15886.69944 | -15886.09790 | -15887.27600 | -15890.39057 | -15891.68433 |
| 13.61    | -15879.36281 | -15884.98945 | -15886.17531 | -15885.50956 | -15886.69944 | -15886.09790 | -15887.27600 | -15890.39057 | -15891.68433 |
| 13.70    | -15879.36280 | -15884.98945 | -15886.17531 | -15885.50956 | -15886.69944 | -15886.09791 | -15887.27601 | -15890.39057 | -15891.68432 |
| 13.80    | -15879.36280 | -15884.98945 | -15886.17531 | -15885.50956 | -15886.69943 | -15886.09791 | -15887.27601 | -15890.39057 | -15891.68432 |
| 13.89    | -15879.36279 | -15884.98944 | -15886.17530 | -15885.50956 | -15886.69943 | -15886.09792 | -15887.27601 | -15890.39057 | -15891.68432 |
| 13.98    | -15879.36279 | -15884.98944 | -15886.17530 | -15885.50956 | -15886.69943 | -15886.09792 | -15887.27601 | -15890.39057 | -15891.68432 |
| 14.08    | -15879.36279 | -15884.98944 | -15886.17530 | -15885.50956 | -15886.69942 | -15886.09792 | -15887.27602 | -15890.39057 | -15891.68431 |
| 14.17    | -15879.36278 | -15884.98944 | -15886.17529 | -15885.50955 | -15886.69942 | -15886.09793 | -15887.27602 | -15890.39057 | -15891.68431 |
| 14.27    | -15879.36278 | -15884.98944 | -15886.17529 | -15885.50955 | -15886.69942 | -15886.09793 | -15887.27602 | -15890.39056 | -15891.68431 |
| 14.36    | -15879.36278 | -15884.98943 | -15886.17529 | -15885.50955 | -15886.69942 | -15886.09793 | -15887.27603 | -15890.39056 | -15891.68431 |
| 14.46    | -15879.36278 | -15884.98943 | -15886.17529 | -15885.50955 | -15886.69942 | -15886.09793 | -15887.27603 | -15890.39056 | -15891.68431 |
| 14.55    | -15879.36277 | -15884.98943 | -15886.17529 | -15885.50955 | -15886.69942 | -15886.09794 | -15887.27603 | -15890.39056 | -15891.68431 |
| 14.65    | -15879.36277 | -15884.98943 | -15886.17528 | -15885.50955 | -15886.69942 | -15886.09794 | -15887.27603 | -15890.39056 | -15891.68430 |
| 14.74    | -15879.36277 | -15884.98943 | -15886.17528 | -15885.50955 | -15886.69942 | -15886.09794 | -15887.27604 | -15890.39056 | -15891.68430 |
| 14.83    | -15879.36277 | -15884.98943 | -15886.17528 | -15885.50955 | -15886.69942 | -15886.09795 | -15887.27604 | -15890.39056 | -15891.68430 |
| 14.93    | -15879.36276 | -15884.98943 | -15886.17528 | -15885.50955 | -15886.69942 | -15886.09795 | -15887.27604 | -15890.39056 | -15891.68430 |

Table S23: The absolute energies in hartree of the potential energy curve of TaSi in the  $^4\Pi$  state with a SP-based wave function and nom-CPO active space.

| Distance | SP           | tpbe         | ftpbe        | trevpbe      | ftrevpbe     | tblyp        | ftblyp       | torelyp      | ftorelyp     |
|----------|--------------|--------------|--------------|--------------|--------------|--------------|--------------|--------------|--------------|
| 15.02    | -15879.36276 | -15884.98943 | -15886.17528 | -15885.50955 | -15886.69942 | -15886.09795 | -15887.27605 | -15890.39056 | -15891.68430 |
| 15.12    | -15879.36276 | -15884.98943 | -15886.17528 | -15885.50955 | -15886.69942 | -15886.09796 | -15887.27605 | -15890.39056 | -15891.68430 |
| 15.21    | -15879.36276 | -15884.98943 | -15886.17528 | -15885.50955 | -15886.69942 | -15886.09796 | -15887.27605 | -15890.39056 | -15891.68430 |
| 15.31    | -15879.36276 | -15884.98943 | -15886.17528 | -15885.50955 | -15886.69941 | -15886.09796 | -15887.27605 | -15890.39056 | -15891.68430 |
| 15.40    | -15879.36275 | -15884.98943 | -15886.17528 | -15885.50955 | -15886.69941 | -15886.09796 | -15887.27605 | -15890.39056 | -15891.68430 |
| 15.50    | -15879.36275 | -15884.98943 | -15886.17528 | -15885.50955 | -15886.69941 | -15886.09796 | -15887.27606 | -15890.39056 | -15891.68430 |
| 15.59    | -15879.36275 | -15884.98943 | -15886.17528 | -15885.50955 | -15886.69941 | -15886.09797 | -15887.27606 | -15890.39056 | -15891.68430 |
| 15.68    | -15879.36275 | -15884.98943 | -15886.17528 | -15885.50955 | -15886.69941 | -15886.09797 | -15887.27606 | -15890.39056 | -15891.68430 |
| 15.78    | -15879.36275 | -15884.98942 | -15886.17528 | -15885.50955 | -15886.69941 | -15886.09797 | -15887.27606 | -15890.39056 | -15891.68430 |
| 15.87    | -15879.36275 | -15884.98942 | -15886.17528 | -15885.50955 | -15886.69941 | -15886.09797 | -15887.27606 | -15890.39056 | -15891.68430 |
| 15.97    | -15879.36275 | -15884.98942 | -15886.17528 | -15885.50954 | -15886.69941 | -15886.09797 | -15887.27606 | -15890.39056 | -15891.68429 |
| 16.06    | -15879.36274 | -15884.98942 | -15886.17528 | -15885.50954 | -15886.69941 | -15886.09797 | -15887.27606 | -15890.39056 | -15891.68430 |
| 16.16    | -15879.36274 | -15884.98942 | -15886.17528 | -15885.50954 | -15886.69941 | -15886.09797 | -15887.27606 | -15890.39056 | -15891.68429 |
| 16.25    | -15879.36274 | -15884.98942 | -15886.17528 | -15885.50954 | -15886.69941 | -15886.09797 | -15887.27606 | -15890.39056 | -15891.68430 |
| 16.35    | -15879.36274 | -15884.98942 | -15886.17528 | -15885.50954 | -15886.69941 | -15886.09797 | -15887.27606 | -15890.39056 | -15891.68429 |
| 16.44    | -15879.36274 | -15884.98942 | -15886.17528 | -15885.50954 | -15886.69941 | -15886.09798 | -15887.27607 | -15890.39056 | -15891.68429 |
| 16.54    | -15879.36274 | -15884.98943 | -15886.17528 | -15885.50954 | -15886.69941 | -15886.09798 | -15887.27607 | -15890.39056 | -15891.68429 |
| 16.63    | -15879.36274 | -15884.98942 | -15886.17528 | -15885.50955 | -15886.69941 | -15886.09798 | -15887.27607 | -15890.39056 | -15891.68430 |
| 16.72    | -15879.36274 | -15884.98942 | -15886.17528 | -15885.50954 | -15886.69941 | -15886.09798 | -15887.27607 | -15890.39056 | -15891.68430 |
| 16.82    | -15879.36274 | -15884.98942 | -15886.17528 | -15885.50955 | -15886.69941 | -15886.09798 | -15887.27607 | -15890.39056 | -15891.68430 |
| 16.91    | -15879.36274 | -15884.98943 | -15886.17528 | -15885.50955 | -15886.69941 | -15886.09798 | -15887.27607 | -15890.39056 | -15891.68430 |
| 17.01    | -15879.36273 | -15884.98943 | -15886.17528 | -15885.50955 | -15886.69941 | -15886.09799 | -15887.27608 | -15890.39056 | -15891.68430 |
| 17.10    | -15879.36273 | -15884.98943 | -15886.17528 | -15885.50955 | -15886.69941 | -15886.09799 | -15887.27608 | -15890.39056 | -15891.68430 |
| 17.20    | -15879.36273 | -15884.98943 | -15886.17528 | -15885.50955 | -15886.69941 | -15886.09799 | -15887.27608 | -15890.39056 | -15891.68430 |
| 17.29    | -15879.36273 | -15884.98943 | -15886.17528 | -15885.50955 | -15886.69941 | -15886.09799 | -15887.27608 | -15890.39056 | -15891.68430 |
| 17.39    | -15879.36273 | -15884.98943 | -15886.17528 | -15885.50955 | -15886.69941 | -15886.09799 | -15887.27608 | -15890.39056 | -15891.68430 |
| 17.48    | -15879.36273 | -15884.98943 | -15886.17528 | -15885.50955 | -15886.69941 | -15886.09799 | -15887.27608 | -15890.39056 | -15891.68430 |
| 17.57    | -15879.36273 | -15884.98943 | -15886.17528 | -15885.50955 | -15886.69941 | -15886.09799 | -15887.27608 | -15890.39056 | -15891.68430 |
| 17.67    | -15879.36273 | -15884.98943 | -15886.17528 | -15885.50955 | -15886.69941 | -15886.09799 | -15887.27608 | -15890.39056 | -15891.68430 |
| 17.76    | -15879.36273 | -15884.98943 | -15886.17528 | -15885.50955 | -15886.69941 | -15886.09799 | -15887.27608 | -15890.39056 | -15891.68430 |
| 17.86    | -15879.36273 | -15884.98943 | -15886.17528 | -15885.50955 | -15886.69941 | -15886.09799 | -15887.27608 | -15890.39056 | -15891.68430 |
| 17.95    | -15879.36273 | -15884.98943 | -15886.17528 | -15885.50955 | -15886.69941 | -15886.09799 | -15887.27608 | -15890.39056 | -15891.68430 |
| 18.05    | -15879.36273 | -15884.98943 | -15886.17528 | -15885.50955 | -15886.69941 | -15886.09799 | -15887.27608 | -15890.39056 | -15891.68429 |

Table S24: The absolute energies in hartree of the potential energy curve of TaSi in the  $^6\Sigma^+$  state with a SP-based wave function and nom-CPO active space.

| Distance | SP           | tpbe         | ftpbe        | trevpbe      | ftrevpbe     | tblyp        | ftblyp       | torelyp      | ftorelyp     |
|----------|--------------|--------------|--------------|--------------|--------------|--------------|--------------|--------------|--------------|
| 1.98     | -15875.44003 | -15881.16861 | -15882.35914 | -15881.66691 | -15882.86162 | -15882.23302 | -15883.41624 | -15886.59227 | -15887.88893 |
| 2.08     | -15876.16578 | -15881.88686 | -15883.07726 | -15882.38627 | -15883.58103 | -15882.95416 | -15884.13705 | -15887.30498 | -15888.60182 |
| 2.17     | -15876.74344 | -15882.45777 | -15883.64823 | -15882.95821 | -15884.15322 | -15883.52756 | -15884.71028 | -15887.87118 | -15889.16839 |
| 2.27     | -15877.20408 | -15882.91258 | -15884.10323 | -15883.41398 | -15884.60939 | -15883.98454 | -15885.16724 | -15888.32200 | -15889.61971 |
| 2.36     | -15877.57283 | -15883.27685 | -15884.46778 | -15883.77915 | -15884.97503 | -15884.35069 | -15885.53349 | -15888.68295 | -15889.98122 |
| 2.46     | -15877.86976 | -15883.57054 | -15884.76176 | -15884.07368 | -15885.27000 | -15884.64603 | -15885.82898 | -15888.97390 | -15890.27268 |
| 2.55     | -15878.11065 | -15883.80933 | -15885.00077 | -15884.31325 | -15885.50991 | -15884.88626 | -15886.06935 | -15889.21046 | -15890.50961 |
| 2.65     | -15878.30775 | -15884.00543 | -15885.19699 | -15884.51009 | -15885.70692 | -15885.08362 | -15886.26677 | -15889.40478 | -15890.70409 |
| 2.74     | -15878.47051 | -15884.16772 | -15885.35927 | -15884.67309 | -15885.86989 | -15885.24701 | -15886.43012 | -15889.56565 | -15890.86489 |
| 2.83     | -15878.60618 | -15884.30324 | -15885.49464 | -15884.80930 | -15886.00587 | -15885.38348 | -15886.56646 | -15889.70006 | -15891.04571 |
| 2.93     | -15878.79253 | -15884.47133 | -15885.66131 | -15884.97789 | -15886.17329 | -15885.55253 | -15886.73208 | -15889.81294 | -15891.16830 |
| 3.02     | -15878.90028 | -15884.58089 | -15885.77040 | -15885.08784 | -15886.28327 | -15885.66204 | -15886.84077 | -15889.97555 | -15891.27538 |
| 3.12     | -15878.99292 | -15884.67540 | -15885.86419 | -15885.18273 | -15886.37765 | -15885.75679 | -15886.93472 | -15890.06796 | -15891.36733 |

Table S24: The absolute energies in hartree of the potential energy curve of TaSi in the  ${}^6\Sigma^+$  state with a SP-based wave function and nom-CPO active space.

| Distance | SP           | tpbe         | ftpbe        | trevpbe      | ftrevpbe     | tblyp        | ftblyp       | torelyp      | ftorelyp     |
|----------|--------------|--------------|--------------|--------------|--------------|--------------|--------------|--------------|--------------|
| 3.21     | -15879.07227 | -15884.75510 | -15885.94315 | -15885.26283 | -15886.45707 | -15885.83692 | -15887.01414 | -15890.14615 | -15891.44482 |
| 3.31     | -15879.13993 | -15884.82160 | -15886.00902 | -15885.32975 | -15886.52337 | -15885.90392 | -15887.08059 | -15890.21152 | -15891.50956 |
| 3.40     | -15879.19731 | -15884.87720 | -15886.06410 | -15885.38578 | -15886.57887 | -15885.96004 | -15887.13627 | -15890.26622 | -15891.56375 |
| 3.50     | -15879.24570 | -15884.92369 | -15886.11016 | -15885.43269 | -15886.62533 | -15886.00706 | -15887.18293 | -15890.31194 | -15891.60906 |
| 3.59     | -15879.28629 | -15884.96232 | -15886.14841 | -15885.47174 | -15886.66399 | -15886.04625 | -15887.22180 | -15890.34993 | -15891.64668 |
| 3.68     | -15879.32011 | -15884.99425 | -15886.18001 | -15885.50406 | -15886.69596 | -15886.07873 | -15887.25400 | -15890.38130 | -15891.67773 |
| 3.78     | -15879.34807 | -15885.02049 | -15886.20596 | -15885.53068 | -15886.72227 | -15886.10553 | -15887.28054 | -15890.40708 | -15891.70322 |
| 3.87     | -15879.37097 | -15885.04182 | -15886.22703 | -15885.55237 | -15886.74368 | -15886.12741 | -15887.30221 | -15890.42801 | -15891.72389 |
| 3.97     | -15879.38950 | -15885.05888 | -15886.24385 | -15885.56977 | -15886.76083 | -15886.14502 | -15887.31963 | -15890.44474 | -15891.74038 |
| 4.06     | -15879.40428 | -15885.07229 | -15886.25707 | -15885.58351 | -15886.77435 | -15886.15899 | -15887.33343 | -15890.45788 | -15891.75331 |
| 4.16     | -15879.41584 | -15885.08266 | -15886.26727 | -15885.59419 | -15886.78483 | -15886.16991 | -15887.34421 | -15890.46804 | -15891.76328 |
| 4.35     | -15879.42464 | -15885.09043 | -15886.27489 | -15885.60225 | -15886.79271 | -15886.17822 | -15887.35240 | -15890.47565 | -15891.77071 |
| 4.44     | -15879.43110 | -15885.09594 | -15886.28027 | -15885.60804 | -15886.79834 | -15886.18427 | -15887.35835 | -15890.48104 | -15891.77595 |
| 4.54     | -15879.43557 | -15885.09954 | -15886.28376 | -15885.61189 | -15886.80207 | -15886.18839 | -15887.36240 | -15890.48455 | -15891.77933 |
| 4.63     | -15879.43836 | -15885.10156 | -15886.28570 | -15885.61416 | -15886.80423 | -15886.19095 | -15887.36489 | -15890.48653 | -15891.78120 |
| 4.72     | -15879.43974 | -15885.10229 | -15886.28637 | -15885.61513 | -15886.80510 | -15886.19221 | -15887.36611 | -15890.48726 | -15891.78183 |
| 4.82     | -15879.43994 | -15885.10193 | -15886.28596 | -15885.61499 | -15886.80489 | -15886.19237 | -15887.36625 | -15890.48692 | -15891.78141 |
| 4.91     | -15879.43916 | -15885.10063 | -15886.28463 | -15885.61390 | -15886.80374 | -15886.19158 | -15887.36545 | -15890.48567 | -15891.78008 |
| 5.01     | -15879.43759 | -15885.09856 | -15886.28255 | -15885.61203 | -15886.80183 | -15886.19002 | -15887.36390 | -15890.48367 | -15891.77804 |
| 5.10     | -15879.43537 | -15885.09590 | -15886.27989 | -15885.60956 | -15886.79934 | -15886.18787 | -15887.36176 | -15890.48110 | -15891.77543 |
| 5.20     | -15879.43263 | -15885.09277 | -15886.27679 | -15885.60662 | -15886.79639 | -15886.18524 | -15887.35916 | -15890.47809 | -15891.77239 |
| 5.29     | -15879.42949 | -15885.08927 | -15886.27332 | -15885.60330 | -15886.79308 | -15886.18222 | -15887.35619 | -15890.47471 | -15891.76900 |
| 5.39     | -15879.42605 | -15885.08544 | -15886.26954 | -15885.59964 | -15886.78944 | -15886.17886 | -15887.35289 | -15890.47101 | -15891.76531 |
| 5.48     | -15879.42237 | -15885.08134 | -15886.26551 | -15885.59571 | -15886.78555 | -15886.17523 | -15887.34933 | -15890.46706 | -15891.76137 |
| 5.57     | -15879.41854 | -15885.07705 | -15886.26130 | -15885.59159 | -15886.78148 | -15886.17139 | -15887.34558 | -15890.46293 | -15891.75727 |
| 5.67     | -15879.41462 | -15885.07260 | -15886.25695 | -15885.58730 | -15886.77727 | -15886.16738 | -15887.34167 | -15890.45864 | -15891.75304 |
| 5.76     | -15879.41065 | -15885.06802 | -15886.25248 | -15885.58288 | -15886.77295 | -15886.16320 | -15887.33761 | -15890.45422 | -15891.74868 |
| 5.86     | -15879.40668 | -15885.06324 | -15886.24785 | -15885.57828 | -15886.76846 | -15886.15883 | -15887.33338 | -15890.44961 | -15891.74416 |
| 5.95     | -15879.40275 | -15885.05818 | -15886.24296 | -15885.57339 | -15886.76373 | -15886.15413 | -15887.32885 | -15890.44469 | -15891.73938 |
| 6.05     | -15879.39891 | -15885.05264 | -15886.23762 | -15885.56804 | -15886.75857 | -15886.14891 | -15887.32385 | -15890.43928 | -15891.73414 |
| 6.14     | -15879.39520 | -15885.04652 | -15886.23173 | -15885.56212 | -15886.75287 | -15886.14308 | -15887.31825 | -15890.43327 | -15891.72835 |
| 6.24     | -15879.39167 | -15885.04037 | -15886.22579 | -15885.55618 | -15886.74712 | -15886.13722 | -15887.31262 | -15890.42731 | -15891.72258 |
| 6.33     | -15879.38832 | -15885.03475 | -15886.22035 | -15885.55076 | -15886.74184 | -15886.13193 | -15887.30754 | -15890.42196 | -15891.71741 |
| 6.43     | -15879.38517 | -15885.02972 | -15886.21546 | -15885.54591 | -15886.73709 | -15886.12727 | -15887.30308 | -15890.41728 | -15891.71287 |
| 6.52     | -15879.38221 | -15885.02523 | -15886.21110 | -15885.54159 | -15886.73284 | -15886.12319 | -15887.29921 | -15890.41319 | -15891.70890 |
| 6.61     | -15879.37944 | -15885.02122 | -15886.20721 | -15885.53773 | -15886.72905 | -15886.11964 | -15887.29587 | -15890.40961 | -15891.70543 |
| 6.71     | -15879.37689 | -15885.01764 | -15886.20375 | -15885.53430 | -15886.72565 | -15886.11658 | -15887.29305 | -15890.40649 | -15891.70242 |
| 6.80     | -15879.37456 | -15885.01445 | -15886.20067 | -15885.53123 | -15886.72261 | -15886.11396 | -15887.29070 | -15890.40379 | -15891.69980 |
| 6.90     | -15879.37247 | -15885.01156 | -15886.19791 | -15885.52847 | -15886.71985 | -15886.11172 | -15887.28878 | -15890.40142 | -15891.69752 |
| 6.99     | -15879.37065 | -15885.00890 | -15886.19538 | -15885.52592 | -15886.71732 | -15886.10979 | -15887.28719 | -15890.39932 | -15891.69548 |
| 7.09     | -15879.36910 | -15885.00644 | -15886.19305 | -15885.52357 | -15886.71498 | -15886.10806 | -15887.28581 | -15890.39742 | -15891.69362 |
| 7.18     | -15879.36781 | -15885.00420 | -15886.19092 | -15885.52143 | -15886.71285 | -15886.10647 | -15887.28450 | -15890.39570 | -15891.69192 |
| 7.28     | -15879.36672 | -15885.00221 | -15886.18900 | -15885.51953 | -15886.71097 | -15886.10503 | -15887.28325 | -15890.39416 | -15891.69040 |
| 7.37     | -15879.36579 | -15885.00045 | -15886.18729 | -15885.51786 | -15886.70931 | -15886.10372 | -15887.28208 | -15890.39279 | -15891.68903 |
| 7.46     | -15879.36498 | -15884.99889 | -15886.18577 | -15885.51640 | -15886.70784 | -15886.10256 | -15887.28101 | -15890.39158 | -15891.68782 |
| 7.56     | -15879.36428 | -15884.99752 | -15886.18441 | -15885.51510 | -15886.70654 | -15886.10152 | -15887.28004 | -15890.39051 | -15891.68674 |
| 7.65     | -15879.36365 | -15884.99628 | -15886.18318 | -15885.51395 | -15886.70538 | -15886.10059 | -15887.27916 | -15890.38957 | -15891.68578 |
| 7.75     | -15879.36310 | -15884.99518 | -15886.18208 | -15885.51292 | -15886.70434 | -15886.09975 | -15887.27836 | -15890.38873 | -15891.68493 |
| 7.84     | -15879.36261 | -15884.99418 | -15886.18108 | -15885.51200 | -15886.70341 | -15886.09901 | -15887.27764 | -15890.38800 | -15891.68417 |
| 7.94     | -15879.36216 | -15884.99328 | -15886.18018 | -15885.51118 | -15886.70256 | -15886.09834 | -15887.27699 | -15890.38735 | -15891.68349 |
| 8.03     | -15879.36176 | -15884.99246 | -15886.17936 | -15885.51044 | -15886.70181 | -15886.09773 | -15887.27640 | -15890.38678 | -15891.68289 |
| 8.13     | -15879.36140 | -15884.99173 | -15886.17861 | -15885.50977 | -15886.70113 | -15886.09719 | -15887.27586 | -15890.38628 | -15891.68236 |

Table S24: The absolute energies in hartree of the potential energy curve of TaSi in the  ${}^6\Sigma^+$  state with a SP-based wave function and nom-CPO active space.

| Distance | SP           | tpbe         | ftpbe        | trevpbe      | ftrevpbe     | tblyp        | ftblyp       | torelyp      | ftorelyp     |
|----------|--------------|--------------|--------------|--------------|--------------|--------------|--------------|--------------|--------------|
| 8.22     | -15879.36108 | -15884.99106 | -15886.17793 | -15885.50917 | -15886.70051 | -15886.09670 | -15887.27538 | -15890.38583 | -15891.68190 |
| 8.31     | -15879.36079 | -15884.99045 | -15886.17732 | -15885.50864 | -15886.69996 | -15886.09626 | -15887.27494 | -15890.38545 | -15891.68149 |
| 8.41     | -15879.36052 | -15884.98991 | -15886.17676 | -15885.50816 | -15886.69946 | -15886.09587 | -15887.27455 | -15890.38512 | -15891.68113 |
| 8.50     | -15879.36028 | -15884.98942 | -15886.17626 | -15885.50774 | -15886.69902 | -15886.09551 | -15887.27420 | -15890.38484 | -15891.68082 |
| 8.60     | -15879.36006 | -15884.98897 | -15886.17580 | -15885.50736 | -15886.69862 | -15886.09520 | -15887.27388 | -15890.38460 | -15891.68054 |
| 8.69     | -15879.35986 | -15884.98857 | -15886.17539 | -15885.50702 | -15886.69826 | -15886.09492 | -15887.27359 | -15890.38439 | -15891.68030 |
| 8.79     | -15879.35967 | -15884.98821 | -15886.17501 | -15885.50671 | -15886.69794 | -15886.09466 | -15887.27333 | -15890.38421 | -15891.68010 |
| 8.88     | -15879.35951 | -15884.98788 | -15886.17467 | -15885.50645 | -15886.69765 | -15886.09444 | -15887.27310 | -15890.38406 | -15891.67993 |
| 8.98     | -15879.35935 | -15884.98759 | -15886.17436 | -15885.50621 | -15886.69740 | -15886.09424 | -15887.27289 | -15890.38394 | -15891.67978 |
| 9.07     | -15879.35922 | -15884.98732 | -15886.17409 | -15885.50600 | -15886.69717 | -15886.09407 | -15887.27271 | -15890.38385 | -15891.67966 |
| 9.17     | -15879.35909 | -15884.98708 | -15886.17384 | -15885.50582 | -15886.69697 | -15886.09391 | -15887.27254 | -15890.38377 | -15891.67955 |
| 9.26     | -15879.35897 | -15884.98686 | -15886.17361 | -15885.50565 | -15886.69679 | -15886.09377 | -15887.27239 | -15890.38370 | -15891.67947 |
| 9.35     | -15879.35886 | -15884.98667 | -15886.17340 | -15885.50551 | -15886.69663 | -15886.09364 | -15887.27226 | -15890.38366 | -15891.67939 |
| 9.45     | -15879.35877 | -15884.98650 | -15886.17322 | -15885.50539 | -15886.69649 | -15886.09354 | -15887.27215 | -15890.38362 | -15891.67933 |
| 9.54     | -15879.35868 | -15884.98634 | -15886.17305 | -15885.50527 | -15886.69637 | -15886.09344 | -15887.27204 | -15890.38360 | -15891.67928 |
| 9.64     | -15879.35859 | -15884.98620 | -15886.17290 | -15885.50518 | -15886.69626 | -15886.09337 | -15887.27195 | -15890.38358 | -15891.67924 |
| 9.73     | -15879.35852 | -15884.98607 | -15886.17276 | -15885.50509 | -15886.69615 | -15886.09329 | -15887.27187 | -15890.38358 | -15891.67921 |
| 9.83     | -15879.35845 | -15884.98595 | -15886.17263 | -15885.50502 | -15886.69606 | -15886.09323 | -15887.27179 | -15890.38357 | -15891.67918 |
| 9.92     | -15879.35838 | -15884.98585 | -15886.17252 | -15885.50495 | -15886.69598 | -15886.09318 | -15887.27173 | -15890.38357 | -15891.67917 |
| 10.02    | -15879.35832 | -15884.98576 | -15886.17242 | -15885.50490 | -15886.69591 | -15886.09313 | -15887.27168 | -15890.38358 | -15891.67916 |
| 10.11    | -15879.35827 | -15884.98568 | -15886.17232 | -15885.50485 | -15886.69585 | -15886.09309 | -15887.27163 | -15890.38359 | -15891.67915 |
| 10.20    | -15879.35822 | -15884.98560 | -15886.17224 | -15885.50481 | -15886.69580 | -15886.09306 | -15887.27159 | -15890.38360 | -15891.67915 |
| 10.30    | -15879.35817 | -15884.98554 | -15886.17217 | -15885.50477 | -15886.69576 | -15886.09303 | -15887.27156 | -15890.38361 | -15891.67914 |
| 10.39    | -15879.35813 | -15884.98548 | -15886.17210 | -15885.50474 | -15886.69572 | -15886.09301 | -15887.27153 | -15890.38363 | -15891.67914 |
| 10.49    | -15879.35809 | -15884.98542 | -15886.17204 | -15885.50472 | -15886.69568 | -15886.09299 | -15887.27150 | -15890.38365 | -15891.67914 |
| 10.58    | -15879.35805 | -15884.98537 | -15886.17199 | -15885.50469 | -15886.69565 | -15886.09297 | -15887.27148 | -15890.38367 | -15891.67914 |
| 10.68    | -15879.35802 | -15884.98533 | -15886.17194 | -15885.50468 | -15886.69563 | -15886.09297 | -15887.27147 | -15890.38369 | -15891.67915 |
| 10.77    | -15879.35798 | -15884.98529 | -15886.17190 | -15885.50466 | -15886.69560 | -15886.09296 | -15887.27145 | -15890.38370 | -15891.67915 |
| 10.87    | -15879.35796 | -15884.98525 | -15886.17185 | -15885.50465 | -15886.69558 | -15886.09295 | -15887.27144 | -15890.38372 | -15891.67915 |
| 10.96    | -15879.35793 | -15884.98522 | -15886.17181 | -15885.50463 | -15886.69555 | -15886.09295 | -15887.27143 | -15890.38373 | -15891.67915 |
| 11.05    | -15879.35790 | -15884.98519 | -15886.17177 | -15885.50462 | -15886.69553 | -15886.09295 | -15887.27142 | -15890.38374 | -15891.67915 |
| 11.15    | -15879.35788 | -15884.98516 | -15886.17173 | -15885.50461 | -15886.69551 | -15886.09294 | -15887.27141 | -15890.38376 | -15891.67915 |
| 11.24    | -15879.35786 | -15884.98513 | -15886.17170 | -15885.50460 | -15886.69549 | -15886.09295 | -15887.27141 | -15890.38377 | -15891.67915 |
| 11.34    | -15879.35784 | -15884.98511 | -15886.17168 | -15885.50459 | -15886.69548 | -15886.09295 | -15887.27140 | -15890.38378 | -15891.67915 |
| 11.43    | -15879.35782 | -15884.98509 | -15886.17165 | -15885.50458 | -15886.69546 | -15886.09295 | -15887.27140 | -15890.38379 | -15891.67915 |
| 11.53    | -15879.35780 | -15884.98507 | -15886.17163 | -15885.50458 | -15886.69545 | -15886.09295 | -15887.27140 | -15890.38380 | -15891.67916 |
| 11.62    | -15879.35778 | -15884.98505 | -15886.17161 | -15885.50457 | -15886.69545 | -15886.09296 | -15887.27141 | -15890.38381 | -15891.67916 |
| 11.72    | -15879.35777 | -15884.98504 | -15886.17160 | -15885.50457 | -15886.69544 | -15886.09296 | -15887.27141 | -15890.38382 | -15891.67916 |
| 11.81    | -15879.35775 | -15884.98502 | -15886.17158 | -15885.50457 | -15886.69544 | -15886.09297 | -15887.27141 | -15890.38382 | -15891.67916 |
| 11.91    | -15879.35774 | -15884.98501 | -15886.17157 | -15885.50456 | -15886.69543 | -15886.09297 | -15887.27142 | -15890.38383 | -15891.67916 |
| 12.00    | -15879.35772 | -15884.98500 | -15886.17155 | -15885.50456 | -15886.69542 | -15886.09298 | -15887.27142 | -15890.38384 | -15891.67916 |
| 12.09    | -15879.35771 | -15884.98499 | -15886.17154 | -15885.50456 | -15886.69541 | -15886.09299 | -15887.27142 | -15890.38384 | -15891.67916 |
| 12.19    | -15879.35770 | -15884.98498 | -15886.17152 | -15885.50455 | -15886.69540 | -15886.09299 | -15887.27143 | -15890.38385 | -15891.67916 |
| 12.28    | -15879.35769 | -15884.98496 | -15886.17151 | -15885.50455 | -15886.69539 | -15886.09300 | -15887.27143 | -15890.38385 | -15891.67915 |
| 12.38    | -15879.35768 | -15884.98495 | -15886.17149 | -15885.50454 | -15886.69538 | -15886.09300 | -15887.27143 | -15890.38385 | -15891.67915 |
| 12.47    | -15879.35767 | -15884.98494 | -15886.17148 | -15885.50454 | -15886.69537 | -15886.09301 | -15887.27143 | -15890.38385 | -15891.67915 |
| 12.57    | -15879.35766 | -15884.98493 | -15886.17147 | -15885.50453 | -15886.69537 | -15886.09301 | -15887.27144 | -15890.38386 | -15891.67914 |
| 12.66    | -15879.35765 | -15884.98493 | -15886.17146 | -15885.50453 | -15886.69536 | -15886.09302 | -15887.27144 | -15890.38386 | -15891.67914 |
| 12.76    | -15879.35765 | -15884.98492 | -15886.17145 | -15885.50453 | -15886.69536 | -15886.09302 | -15887.27145 | -15890.38386 | -15891.67914 |
| 12.85    | -15879.35764 | -15884.98491 | -15886.17145 | -15885.50453 | -15886.69535 | -15886.09303 | -15887.27145 | -15890.38386 | -15891.67913 |
| 12.94    | -15879.35763 | -15884.98491 | -15886.17144 | -15885.50452 | -15886.69535 | -15886.09303 | -15887.27146 | -15890.38386 | -15891.67913 |
| 13.04    | -15879.35763 | -15884.98490 | -15886.17143 | -15885.50452 | -15886.69535 | -15886.09304 | -15887.27146 | -15890.38386 | -15891.67913 |



Table S24: The absolute energies in hartree of the potential energy curve of TaSi in the  ${}^6\Sigma^+$  state with a SP-based wave function and nom-CPO active space.

| Distance | SP           | tpbe         | ftpbe        | trevpbe      | ftrevpbe     | tblyp        | ftblyp       | torelyp      | ftorelyp     |
|----------|--------------|--------------|--------------|--------------|--------------|--------------|--------------|--------------|--------------|
| 13.13    | -15879.35762 | -15884.98490 | -15886.17143 | -15885.50452 | -15886.69535 | -15886.09305 | -15887.27147 | -15890.38386 | -15891.67913 |
| 13.23    | -15879.35761 | -15884.98490 | -15886.17143 | -15885.50452 | -15886.69534 | -15886.09305 | -15887.27147 | -15890.38386 | -15891.67913 |
| 13.32    | -15879.35761 | -15884.98489 | -15886.17142 | -15885.50452 | -15886.69534 | -15886.09306 | -15887.27148 | -15890.38386 | -15891.67913 |
| 13.42    | -15879.35760 | -15884.98489 | -15886.17142 | -15885.50452 | -15886.69534 | -15886.09306 | -15887.27148 | -15890.38386 | -15891.67912 |
| 13.51    | -15879.35760 | -15884.98489 | -15886.17141 | -15885.50452 | -15886.69533 | -15886.09307 | -15887.27149 | -15890.38386 | -15891.67912 |
| 13.61    | -15879.35759 | -15884.98488 | -15886.17141 | -15885.50451 | -15886.69533 | -15886.09307 | -15887.27149 | -15890.38386 | -15891.67912 |
| 13.70    | -15879.35759 | -15884.98488 | -15886.17140 | -15885.50451 | -15886.69533 | -15886.09308 | -15887.27149 | -15890.38386 | -15891.67911 |
| 13.80    | -15879.35758 | -15884.98488 | -15886.17140 | -15885.50451 | -15886.69532 | -15886.09308 | -15887.27150 | -15890.38386 | -15891.67911 |
| 13.89    | -15879.35758 | -15884.98487 | -15886.17139 | -15885.50451 | -15886.69532 | -15886.09308 | -15887.27150 | -15890.38385 | -15891.67911 |
| 13.98    | -15879.35758 | -15884.98487 | -15886.17139 | -15885.50450 | -15886.69531 | -15886.09308 | -15887.27150 | -15890.38385 | -15891.67910 |
| 14.08    | -15879.35757 | -15884.98486 | -15886.17139 | -15885.50450 | -15886.69531 | -15886.09309 | -15887.27150 | -15890.38385 | -15891.67910 |
| 14.17    | -15879.35757 | -15884.98486 | -15886.17138 | -15885.50450 | -15886.69531 | -15886.09309 | -15887.27150 | -15890.38385 | -15891.67910 |
| 14.27    | -15879.35757 | -15884.98486 | -15886.17138 | -15885.50450 | -15886.69531 | -15886.09309 | -15887.27151 | -15890.38385 | -15891.67909 |
| 14.36    | -15879.35756 | -15884.98486 | -15886.17138 | -15885.50450 | -15886.69530 | -15886.09309 | -15887.27151 | -15890.38385 | -15891.67909 |
| 14.46    | -15879.35756 | -15884.98486 | -15886.17138 | -15885.50450 | -15886.69530 | -15886.09310 | -15887.27151 | -15890.38385 | -15891.67909 |
| 14.55    | -15879.35756 | -15884.98486 | -15886.17138 | -15885.50450 | -15886.69530 | -15886.09310 | -15887.27152 | -15890.38385 | -15891.67909 |
| 14.65    | -15879.35755 | -15884.98486 | -15886.17138 | -15885.50450 | -15886.69530 | -15886.09310 | -15887.27152 | -15890.38385 | -15891.67909 |
| 14.74    | -15879.35755 | -15884.98486 | -15886.17137 | -15885.50450 | -15886.69530 | -15886.09311 | -15887.27152 | -15890.38385 | -15891.67909 |
| 14.83    | -15879.35755 | -15884.98485 | -15886.17137 | -15885.50450 | -15886.69530 | -15886.09311 | -15887.27153 | -15890.38385 | -15891.67909 |
| 14.93    | -15879.35755 | -15884.98485 | -15886.17137 | -15885.50450 | -15886.69530 | -15886.09311 | -15887.27153 | -15890.38385 | -15891.67909 |
| 15.02    | -15879.35755 | -15884.98485 | -15886.17137 | -15885.50450 | -15886.69530 | -15886.09312 | -15887.27153 | -15890.38385 | -15891.67909 |
| 15.12    | -15879.35754 | -15884.98485 | -15886.17137 | -15885.50450 | -15886.69530 | -15886.09312 | -15887.27153 | -15890.38385 | -15891.67909 |
| 15.21    | -15879.35754 | -15884.98485 | -15886.17137 | -15885.50449 | -15886.69530 | -15886.09312 | -15887.27154 | -15890.38385 | -15891.67908 |
| 15.31    | -15879.35754 | -15884.98485 | -15886.17137 | -15885.50449 | -15886.69530 | -15886.09312 | -15887.27154 | -15890.38385 | -15891.67908 |
| 15.40    | -15879.35754 | -15884.98485 | -15886.17137 | -15885.50449 | -15886.69529 | -15886.09312 | -15887.27154 | -15890.38385 | -15891.67908 |
| 15.50    | -15879.35754 | -15884.98485 | -15886.17137 | -15885.50449 | -15886.69529 | -15886.09312 | -15887.27154 | -15890.38384 | -15891.67908 |
| 15.59    | -15879.35753 | -15884.98485 | -15886.17136 | -15885.50449 | -15886.69529 | -15886.09313 | -15887.27154 | -15890.38384 | -15891.67908 |
| 15.68    | -15879.35753 | -15884.98485 | -15886.17136 | -15885.50449 | -15886.69529 | -15886.09313 | -15887.27154 | -15890.38384 | -15891.67908 |
| 15.78    | -15879.35753 | -15884.98484 | -15886.17136 | -15885.50449 | -15886.69529 | -15886.09313 | -15887.27154 | -15890.38384 | -15891.67907 |
| 15.87    | -15879.35753 | -15884.98484 | -15886.17136 | -15885.50449 | -15886.69529 | -15886.09313 | -15887.27154 | -15890.38384 | -15891.67907 |
| 15.97    | -15879.35753 | -15884.98484 | -15886.17136 | -15885.50448 | -15886.69528 | -15886.09313 | -15887.27154 | -15890.38384 | -15891.67907 |
| 16.06    | -15879.35753 | -15884.98484 | -15886.17136 | -15885.50448 | -15886.69528 | -15886.09313 | -15887.27154 | -15890.38384 | -15891.67907 |
| 16.16    | -15879.35752 | -15884.98484 | -15886.17136 | -15885.50448 | -15886.69528 | -15886.09313 | -15887.27154 | -15890.38384 | -15891.67907 |
| 16.25    | -15879.35752 | -15884.98484 | -15886.17136 | -15885.50448 | -15886.69528 | -15886.09313 | -15887.27154 | -15890.38384 | -15891.67907 |
| 16.35    | -15879.35752 | -15884.98484 | -15886.17136 | -15885.50449 | -15886.69528 | -15886.09313 | -15887.27155 | -15890.38384 | -15891.67907 |
| 16.44    | -15879.35752 | -15884.98484 | -15886.17136 | -15885.50449 | -15886.69528 | -15886.09314 | -15887.27155 | -15890.38384 | -15891.67907 |
| 16.54    | -15879.35752 | -15884.98484 | -15886.17136 | -15885.50449 | -15886.69528 | -15886.09314 | -15887.27155 | -15890.38384 | -15891.67907 |
| 16.63    | -15879.35752 | -15884.98485 | -15886.17136 | -15885.50449 | -15886.69529 | -15886.09314 | -15887.27155 | -15890.38384 | -15891.67907 |
| 16.72    | -15879.35752 | -15884.98485 | -15886.17136 | -15885.50449 | -15886.69529 | -15886.09314 | -15887.27155 | -15890.38384 | -15891.67907 |
| 16.82    | -15879.35752 | -15884.98485 | -15886.17136 | -15885.50449 | -15886.69529 | -15886.09314 | -15887.27156 | -15890.38385 | -15891.67908 |
| 16.91    | -15879.35752 | -15884.98485 | -15886.17136 | -15885.50449 | -15886.69529 | -15886.09315 | -15887.27156 | -15890.38385 | -15891.67908 |
| 17.01    | -15879.35752 | -15884.98485 | -15886.17137 | -15885.50449 | -15886.69529 | -15886.09315 | -15887.27156 | -15890.38385 | -15891.67908 |
| 17.10    | -15879.35751 | -15884.98485 | -15886.17137 | -15885.50449 | -15886.69529 | -15886.09315 | -15887.27156 | -15890.38385 | -15891.67908 |
| 17.20    | -15879.35751 | -15884.98485 | -15886.17137 | -15885.50449 | -15886.69529 | -15886.09315 | -15887.27156 | -15890.38385 | -15891.67908 |
| 17.29    | -15879.35751 | -15884.98485 | -15886.17137 | -15885.50449 | -15886.69529 | -15886.09315 | -15887.27156 | -15890.38385 | -15891.67908 |
| 17.39    | -15879.35751 | -15884.98485 | -15886.17137 | -15885.50449 | -15886.69529 | -15886.09315 | -15887.27156 | -15890.38385 | -15891.67908 |
| 17.48    | -15879.35751 | -15884.98485 | -15886.17137 | -15885.50449 | -15886.69529 | -15886.09315 | -15887.27156 | -15890.38385 | -15891.67908 |
| 17.57    | -15879.35751 | -15884.98485 | -15886.17137 | -15885.50449 | -15886.69529 | -15886.09315 | -15887.27156 | -15890.38385 | -15891.67908 |
| 17.67    | -15879.35751 | -15884.98485 | -15886.17137 | -15885.50449 | -15886.69529 | -15886.09315 | -15887.27156 | -15890.38385 | -15891.67908 |
| 17.76    | -15879.35751 | -15884.98485 | -15886.17136 | -15885.50449 | -15886.69529 | -15886.09315 | -15887.27156 | -15890.38385 | -15891.67907 |
| 17.86    | -15879.35751 | -15884.98485 | -15886.17136 | -15885.50449 | -15886.69529 | -15886.09315 | -15887.27156 | -15890.38385 | -15891.67907 |
| 17.95    | -15879.35751 | -15884.98485 | -15886.17136 | -15885.50449 | -15886.69529 | -15886.09315 | -15887.27156 | -15890.38385 | -15891.67907 |

Table S24: The absolute energies in hartree of the potential energy curve of TaSi in the  ${}^6\Sigma^+$  state with a SP-based wave function and nom-CPO active space.

| Distance | SP           | tpbe         | ftpbe        | trevpbe      | ftrevpbe     | tblyp        | ftblyp       | torelyp      | ftorelyp     |
|----------|--------------|--------------|--------------|--------------|--------------|--------------|--------------|--------------|--------------|
| 18.05    | -15879.35751 | -15884.98485 | -15886.17136 | -15885.50449 | -15886.69529 | -15886.09315 | -15887.27156 | -15890.38385 | -15891.67907 |

Table S25: The absolute energies in hartree of the potential energy curve of TaSi in the  ${}^4\Pi$  state with a SP-based wave function and nom-CPO active space.

| Distance | SP           | tpbe         | ftpbe        | trevpbe      | ftrevpbe     | tblyp        | ftblyp       | torelyp      | ftorelyp     |
|----------|--------------|--------------|--------------|--------------|--------------|--------------|--------------|--------------|--------------|
| 1.98     | -15875.68073 | -15881.41231 | -15882.60413 | -15881.91316 | -15883.10556 | -15882.47916 | -15883.67072 | -15886.84633 | -15888.14250 |
| 2.08     | -15876.40985 | -15882.13483 | -15883.32614 | -15882.63698 | -15883.82887 | -15883.20454 | -15884.39566 | -15887.56348 | -15888.85911 |
| 2.17     | -15876.98796 | -15882.70635 | -15883.89719 | -15883.20975 | -15884.40116 | -15883.77853 | -15884.96921 | -15888.13034 | -15889.42547 |
| 2.27     | -15877.44605 | -15883.15829 | -15884.34869 | -15883.66283 | -15884.85381 | -15884.23262 | -15885.42288 | -15888.57823 | -15889.87292 |
| 2.36     | -15877.81913 | -15883.52630 | -15884.71423 | -15884.03066 | -15885.21821 | -15884.60543 | -15885.79388 | -15888.94315 | -15890.23451 |
| 2.46     | -15878.11749 | -15883.82042 | -15885.00795 | -15884.32574 | -15885.51291 | -15884.90072 | -15886.08869 | -15889.23443 | -15890.52533 |
| 2.55     | -15878.35652 | -15884.05628 | -15885.24347 | -15884.56247 | -15885.74933 | -15885.13751 | -15886.32503 | -15889.46789 | -15890.75841 |
| 2.65     | -15878.54911 | -15884.24659 | -15885.43350 | -15884.75356 | -15885.94021 | -15885.32858 | -15886.51564 | -15889.65619 | -15890.94641 |
| 2.74     | -15878.70516 | -15884.40062 | -15885.58730 | -15884.90829 | -15886.09479 | -15885.48325 | -15886.66988 | -15889.80849 | -15891.09849 |
| 2.83     | -15878.83218 | -15884.52586 | -15885.71233 | -15885.03416 | -15886.22056 | -15885.60917 | -15886.79538 | -15889.93217 | -15891.22201 |
| 2.93     | -15878.93600 | -15884.62801 | -15885.81432 | -15885.13688 | -15886.32320 | -15885.71216 | -15886.89804 | -15890.03275 | -15891.32251 |
| 3.02     | -15879.05151 | -15884.74549 | -15885.93361 | -15885.25381 | -15886.44236 | -15885.83021 | -15887.01806 | -15890.14565 | -15891.43841 |
| 3.12     | -15879.12906 | -15884.82175 | -15886.00965 | -15885.33069 | -15886.51895 | -15885.90703 | -15887.09467 | -15890.22140 | -15891.51371 |
| 3.21     | -15879.19315 | -15884.88412 | -15886.07176 | -15885.39365 | -15886.58158 | -15885.96992 | -15887.15734 | -15890.28330 | -15891.57510 |
| 3.31     | -15879.24603 | -15884.93500 | -15886.12236 | -15885.44509 | -15886.63265 | -15886.02128 | -15887.20848 | -15890.33369 | -15891.62499 |
| 3.40     | -15879.28946 | -15884.97655 | -15886.16362 | -15885.48718 | -15886.67438 | -15886.06329 | -15887.25027 | -15890.37476 | -15891.66560 |
| 3.50     | -15879.32485 | -15885.01041 | -15886.19718 | -15885.52154 | -15886.70838 | -15886.09758 | -15887.28433 | -15890.40816 | -15891.69856 |
| 3.59     | -15879.35340 | -15885.03786 | -15886.22426 | -15885.54946 | -15886.73589 | -15886.12547 | -15887.31191 | -15890.43519 | -15891.72511 |
| 3.68     | -15879.37696 | -15885.06153 | -15886.24676 | -15885.57412 | -15886.75968 | -15886.14889 | -15887.33334 | -15890.45945 | -15891.74874 |
| 3.78     | -15879.39550 | -15885.07867 | -15886.26374 | -15885.59163 | -15886.77715 | -15886.16634 | -15887.35042 | -15890.47615 | -15891.76547 |
| 3.87     | -15879.40957 | -15885.09152 | -15886.27646 | -15885.60479 | -15886.79028 | -15886.17960 | -15887.36339 | -15890.48855 | -15891.77784 |
| 3.97     | -15879.41985 | -15885.10068 | -15886.28550 | -15885.61423 | -15886.79967 | -15886.18922 | -15887.37275 | -15890.49726 | -15891.78651 |
| 4.06     | -15879.42694 | -15885.10676 | -15886.29149 | -15885.62056 | -15886.80597 | -15886.19579 | -15887.37910 | -15890.50291 | -15891.79213 |
| 4.16     | -15879.43136 | -15885.11035 | -15886.29499 | -15885.62437 | -15886.80976 | -15886.19989 | -15887.38298 | -15890.50609 | -15891.79526 |
| 4.35     | -15879.43358 | -15885.11185 | -15886.29642 | -15885.62608 | -15886.81146 | -15886.20192 | -15887.38480 | -15890.50720 | -15891.79635 |
| 4.44     | -15879.43397 | -15885.11157 | -15886.29610 | -15885.62599 | -15886.81139 | -15886.20218 | -15887.38488 | -15890.50655 | -15891.79570 |
| 4.54     | -15879.43289 | -15885.10986 | -15886.29436 | -15885.62444 | -15886.80989 | -15886.20101 | -15887.38352 | -15890.50448 | -15891.79365 |
| 4.63     | -15879.43063 | -15885.10702 | -15886.29151 | -15885.62176 | -15886.80728 | -15886.19872 | -15887.38104 | -15890.50129 | -15891.79051 |
| 4.72     | -15879.42742 | -15885.10332 | -15886.28781 | -15885.61820 | -15886.80381 | -15886.19555 | -15887.37770 | -15890.49725 | -15891.78655 |
| 4.82     | -15879.42349 | -15885.09891 | -15886.28342 | -15885.61392 | -15886.79965 | -15886.19168 | -15887.37365 | -15890.49250 | -15891.78192 |
| 4.91     | -15879.41902 | -15885.09394 | -15886.27848 | -15885.60906 | -15886.79493 | -15886.18722 | -15887.36901 | -15890.48719 | -15891.77676 |
| 5.01     | -15879.41416 | -15885.08855 | -15886.27314 | -15885.60378 | -15886.78983 | -15886.18234 | -15887.36393 | -15890.48147 | -15891.77123 |
| 5.10     | -15879.40905 | -15885.08289 | -15886.26754 | -15885.59821 | -15886.78446 | -15886.17714 | -15887.35854 | -15890.47546 | -15891.76545 |
| 5.20     | -15879.40381 | -15885.07705 | -15886.26177 | -15885.59245 | -15886.77894 | -15886.17175 | -15887.35292 | -15890.46926 | -15891.75953 |
| 5.29     | -15879.39853 | -15885.07104 | -15886.25584 | -15885.58651 | -15886.77327 | -15886.16612 | -15887.34703 | -15890.46285 | -15891.75346 |
| 5.39     | -15879.39340 | -15885.06425 | -15886.24903 | -15885.57980 | -15886.76681 | -15886.15958 | -15887.33995 | -15890.45586 | -15891.74664 |
| 5.48     | -15879.38843 | -15885.05812 | -15886.24295 | -15885.57374 | -15886.76099 | -15886.15384 | -15887.33387 | -15890.44955 | -15891.74062 |
| 5.57     | -15879.38362 | -15885.05210 | -15886.23697 | -15885.56777 | -15886.75528 | -15886.14817 | -15887.32784 | -15890.44334 | -15891.73472 |
| 5.67     | -15879.37903 | -15885.04620 | -15886.23111 | -15885.56193 | -15886.74969 | -15886.14259 | -15887.32188 | -15890.43728 | -15891.72899 |
| 5.76     | -15879.37467 | -15885.04049 | -15886.22542 | -15885.55627 | -15886.74428 | -15886.13718 | -15887.31607 | -15890.43140 | -15891.72345 |
| 5.86     | -15879.37058 | -15885.03502 | -15886.21995 | -15885.55086 | -15886.73910 | -15886.13200 | -15887.31049 | -15890.42581 | -15891.71816 |
| 5.95     | -15879.36676 | -15885.02981 | -15886.21474 | -15885.54571 | -15886.73414 | -15886.12709 | -15887.30519 | -15890.42050 | -15891.71315 |
| 6.05     | -15879.36322 | -15885.02494 | -15886.20984 | -15885.54089 | -15886.72950 | -15886.12253 | -15887.30028 | -15890.41559 | -15891.70848 |
| 6.14     | -15879.35995 | -15885.02045 | -15886.20532 | -15885.53646 | -15886.72518 | -15886.11839 | -15887.29582 | -15890.41110 | -15891.70417 |
| 6.24     | -15879.38957 | -15885.03014 | -15886.21694 | -15885.54704 | -15886.73941 | -15886.12627 | -15887.30400 | -15890.42018 | -15891.71660 |

Table S25: The absolute energies in hartree of the potential energy curve of TaSi in the  $^4\Pi$  state with a SP-based wave function and nom-CPO active space.

| Distance | SP           | tpbe         | ftpbe        | trevpbe      | ftrevpbe     | tblyp        | ftblyp       | torelyp      | ftorelyp     |
|----------|--------------|--------------|--------------|--------------|--------------|--------------|--------------|--------------|--------------|
| 6.33     | -15879.38713 | -15885.02720 | -15886.21391 | -15885.54419 | -15886.73647 | -15886.12377 | -15887.30134 | -15890.41746 | -15891.71383 |
| 6.43     | -15879.38479 | -15885.02449 | -15886.21110 | -15885.54158 | -15886.73372 | -15886.12152 | -15887.29894 | -15890.41499 | -15891.71130 |
| 6.52     | -15879.38256 | -15885.02195 | -15886.20848 | -15885.53913 | -15886.73116 | -15886.11946 | -15887.29677 | -15890.41274 | -15891.70900 |
| 6.61     | -15879.38045 | -15885.01960 | -15886.20605 | -15885.53687 | -15886.72876 | -15886.11761 | -15887.29483 | -15890.41070 | -15891.70688 |
| 6.71     | -15879.37845 | -15885.01742 | -15886.20380 | -15885.53478 | -15886.72652 | -15886.11595 | -15887.29310 | -15890.40886 | -15891.70493 |
| 6.80     | -15879.37659 | -15885.01540 | -15886.20170 | -15885.53284 | -15886.72443 | -15886.11447 | -15887.29157 | -15890.40720 | -15891.70315 |
| 6.90     | -15879.37485 | -15885.01352 | -15886.19976 | -15885.53104 | -15886.72249 | -15886.11314 | -15887.29021 | -15890.40571 | -15891.70154 |
| 6.99     | -15879.37325 | -15885.01177 | -15886.19796 | -15885.52938 | -15886.72068 | -15886.11195 | -15887.28902 | -15890.40437 | -15891.70007 |
| 7.09     | -15879.37178 | -15885.01014 | -15886.19628 | -15885.52783 | -15886.71899 | -15886.11088 | -15887.28798 | -15890.40315 | -15891.69872 |
| 7.18     | -15879.37044 | -15885.00861 | -15886.19471 | -15885.52637 | -15886.71740 | -15886.10990 | -15887.28704 | -15890.40204 | -15891.69748 |
| 7.28     | -15879.36922 | -15885.00716 | -15886.19324 | -15885.52500 | -15886.71591 | -15886.10899 | -15887.28619 | -15890.40101 | -15891.69633 |
| 7.37     | -15879.36812 | -15885.00579 | -15886.19184 | -15885.52372 | -15886.71451 | -15886.10814 | -15887.28541 | -15890.40007 | -15891.69526 |
| 7.46     | -15879.36712 | -15885.00449 | -15886.19052 | -15885.52250 | -15886.71319 | -15886.10734 | -15887.28469 | -15890.39919 | -15891.69425 |
| 7.56     | -15879.36623 | -15885.00328 | -15886.18929 | -15885.52137 | -15886.71196 | -15886.10659 | -15887.28402 | -15890.39838 | -15891.69333 |
| 7.65     | -15879.36544 | -15885.00214 | -15886.18814 | -15885.52031 | -15886.71082 | -15886.10588 | -15887.28339 | -15890.39764 | -15891.69246 |
| 7.75     | -15879.36472 | -15885.00108 | -15886.18706 | -15885.51933 | -15886.70975 | -15886.10522 | -15887.28281 | -15890.39696 | -15891.69167 |
| 7.84     | -15879.36409 | -15885.00008 | -15886.18606 | -15885.51842 | -15886.70877 | -15886.10460 | -15887.28226 | -15890.39632 | -15891.69094 |
| 7.94     | -15879.36352 | -15884.99916 | -15886.18512 | -15885.51758 | -15886.70786 | -15886.10402 | -15887.28175 | -15890.39575 | -15891.69027 |
| 8.03     | -15879.36301 | -15884.99831 | -15886.18426 | -15885.51680 | -15886.70702 | -15886.10348 | -15887.28127 | -15890.39524 | -15891.68966 |
| 8.13     | -15879.36256 | -15884.99752 | -15886.18346 | -15885.51609 | -15886.70626 | -15886.10297 | -15887.28082 | -15890.39477 | -15891.68911 |
| 8.22     | -15879.36215 | -15884.99680 | -15886.18272 | -15885.51545 | -15886.70556 | -15886.10251 | -15887.28041 | -15890.39435 | -15891.68862 |
| 8.31     | -15879.36179 | -15884.99615 | -15886.18206 | -15885.51487 | -15886.70494 | -15886.10208 | -15887.28003 | -15890.39398 | -15891.68818 |
| 8.41     | -15879.36147 | -15884.99555 | -15886.18146 | -15885.51434 | -15886.70438 | -15886.10170 | -15887.27969 | -15890.39366 | -15891.68779 |
| 8.50     | -15879.36118 | -15884.99502 | -15886.18092 | -15885.51388 | -15886.70388 | -15886.10135 | -15887.27939 | -15890.39339 | -15891.68745 |
| 8.60     | -15879.36092 | -15884.99453 | -15886.18042 | -15885.51346 | -15886.70343 | -15886.10104 | -15887.27911 | -15890.39315 | -15891.68715 |
| 8.69     | -15879.36069 | -15884.99408 | -15886.17997 | -15885.51309 | -15886.70302 | -15886.10075 | -15887.27885 | -15890.39293 | -15891.68688 |
| 8.79     | -15879.36048 | -15884.99368 | -15886.17956 | -15885.51275 | -15886.70266 | -15886.10049 | -15887.27862 | -15890.39275 | -15891.68665 |
| 8.88     | -15879.36029 | -15884.99333 | -15886.17920 | -15885.51246 | -15886.70234 | -15886.10027 | -15887.27842 | -15890.39261 | -15891.68645 |
| 8.98     | -15879.36012 | -15884.99300 | -15886.17887 | -15885.51220 | -15886.70205 | -15886.10006 | -15887.27823 | -15890.39248 | -15891.68628 |
| 9.07     | -15879.35997 | -15884.99271 | -15886.17857 | -15885.51197 | -15886.70180 | -15886.09988 | -15887.27806 | -15890.39238 | -15891.68614 |
| 9.17     | -15879.35983 | -15884.99245 | -15886.17830 | -15885.51176 | -15886.70157 | -15886.09972 | -15887.27792 | -15890.39229 | -15891.68601 |
| 9.26     | -15879.35971 | -15884.99222 | -15886.17806 | -15885.51159 | -15886.70138 | -15886.09957 | -15887.27779 | -15890.39223 | -15891.68592 |
| 9.35     | -15879.35960 | -15884.99203 | -15886.17786 | -15885.51144 | -15886.70122 | -15886.09946 | -15887.27769 | -15890.39218 | -15891.68584 |
| 9.45     | -15879.35950 | -15884.99185 | -15886.17768 | -15885.51131 | -15886.70107 | -15886.09935 | -15887.27759 | -15890.39215 | -15891.68577 |
| 9.54     | -15879.35941 | -15884.99169 | -15886.17752 | -15885.51120 | -15886.70095 | -15886.09927 | -15887.27752 | -15890.39213 | -15891.68573 |
| 9.64     | -15879.35932 | -15884.99154 | -15886.17737 | -15885.51110 | -15886.70083 | -15886.09918 | -15887.27744 | -15890.39211 | -15891.68568 |
| 9.73     | -15879.35925 | -15884.99142 | -15886.17724 | -15885.51102 | -15886.70074 | -15886.09912 | -15887.27738 | -15890.39210 | -15891.68565 |
| 9.83     | -15879.35918 | -15884.99129 | -15886.17711 | -15885.51094 | -15886.70065 | -15886.09906 | -15887.27732 | -15890.39210 | -15891.68562 |
| 9.92     | -15879.35912 | -15884.99119 | -15886.17700 | -15885.51088 | -15886.70057 | -15886.09901 | -15887.27728 | -15890.39210 | -15891.68560 |
| 10.02    | -15879.35906 | -15884.99110 | -15886.17691 | -15885.51082 | -15886.70051 | -15886.09897 | -15887.27724 | -15890.39211 | -15891.68559 |
| 10.11    | -15879.35901 | -15884.99102 | -15886.17681 | -15885.51077 | -15886.70044 | -15886.09893 | -15887.27720 | -15890.39211 | -15891.68557 |
| 10.20    | -15879.35896 | -15884.99094 | -15886.17674 | -15885.51073 | -15886.70039 | -15886.09890 | -15887.27717 | -15890.39212 | -15891.68557 |
| 10.30    | -15879.35892 | -15884.99088 | -15886.17667 | -15885.51070 | -15886.70035 | -15886.09888 | -15887.27715 | -15890.39214 | -15891.68557 |
| 10.39    | -15879.35888 | -15884.99082 | -15886.17661 | -15885.51068 | -15886.70032 | -15886.09886 | -15887.27714 | -15890.39216 | -15891.68558 |
| 10.49    | -15879.35884 | -15884.99078 | -15886.17657 | -15885.51066 | -15886.70030 | -15886.09885 | -15887.27713 | -15890.39218 | -15891.68559 |
| 10.58    | -15879.35881 | -15884.99073 | -15886.17652 | -15885.51064 | -15886.70028 | -15886.09884 | -15887.27712 | -15890.39220 | -15891.68559 |
| 10.68    | -15879.35878 | -15884.99070 | -15886.17648 | -15885.51063 | -15886.70026 | -15886.09884 | -15887.27712 | -15890.39222 | -15891.68560 |
| 10.77    | -15879.35875 | -15884.99066 | -15886.17645 | -15885.51062 | -15886.70024 | -15886.09884 | -15887.27712 | -15890.39224 | -15891.68561 |
| 10.87    | -15879.35873 | -15884.99063 | -15886.17641 | -15885.51061 | -15886.70023 | -15886.09883 | -15887.27712 | -15890.39226 | -15891.68562 |
| 10.96    | -15879.35870 | -15884.99060 | -15886.17638 | -15885.51060 | -15886.70021 | -15886.09883 | -15887.27712 | -15890.39227 | -15891.68563 |
| 11.05    | -15879.35868 | -15884.99057 | -15886.17635 | -15885.51059 | -15886.70019 | -15886.09884 | -15887.27712 | -15890.39229 | -15891.68563 |
| 11.15    | -15879.35866 | -15884.99055 | -15886.17632 | -15885.51058 | -15886.70018 | -15886.09884 | -15887.27712 | -15890.39230 | -15891.68564 |

Table S25: The absolute energies in hartree of the potential energy curve of TaSi in the  $^4\Pi$  state with a SP-based wave function and nom-CPO active space.

| Distance | SP           | tpbe         | ftpbe        | trevpbe      | ftrevpbe     | tblyp        | ftblyp       | torelyp      | ftorelyp     |
|----------|--------------|--------------|--------------|--------------|--------------|--------------|--------------|--------------|--------------|
| 11.24    | -15879.35864 | -15884.99053 | -15886.17629 | -15885.51058 | -15886.70017 | -15886.09884 | -15887.27712 | -15890.39232 | -15891.68565 |
| 11.34    | -15879.35863 | -15884.99050 | -15886.17627 | -15885.51057 | -15886.70016 | -15886.09885 | -15887.27712 | -15890.39233 | -15891.68565 |
| 11.43    | -15879.35861 | -15884.99049 | -15886.17625 | -15885.51056 | -15886.70015 | -15886.09885 | -15887.27713 | -15890.39234 | -15891.68565 |
| 11.53    | -15879.35860 | -15884.99047 | -15886.17623 | -15885.51056 | -15886.70014 | -15886.09886 | -15887.27713 | -15890.39235 | -15891.68566 |
| 11.62    | -15879.35858 | -15884.99046 | -15886.17622 | -15885.51056 | -15886.70014 | -15886.09886 | -15887.27714 | -15890.39236 | -15891.68566 |
| 11.72    | -15879.35857 | -15884.99045 | -15886.17621 | -15885.51056 | -15886.70014 | -15886.09887 | -15887.27715 | -15890.39237 | -15891.68567 |
| 11.81    | -15879.35856 | -15884.99044 | -15886.17620 | -15885.51056 | -15886.70014 | -15886.09888 | -15887.27716 | -15890.39238 | -15891.68568 |
| 11.91    | -15879.35855 | -15884.99043 | -15886.17619 | -15885.51056 | -15886.70014 | -15886.09889 | -15887.27717 | -15890.39239 | -15891.68568 |
| 12.00    | -15879.35854 | -15884.99042 | -15886.17618 | -15885.51056 | -15886.70014 | -15886.09890 | -15887.27718 | -15890.39240 | -15891.68569 |
| 12.09    | -15879.35853 | -15884.99041 | -15886.17617 | -15885.51056 | -15886.70014 | -15886.09891 | -15887.27719 | -15890.39241 | -15891.68569 |
| 12.19    | -15879.35852 | -15884.99041 | -15886.17616 | -15885.51056 | -15886.70013 | -15886.09892 | -15887.27720 | -15890.39241 | -15891.68570 |
| 12.28    | -15879.35851 | -15884.99040 | -15886.17615 | -15885.51056 | -15886.70013 | -15886.09893 | -15887.27721 | -15890.39242 | -15891.68570 |
| 12.38    | -15879.35851 | -15884.99039 | -15886.17614 | -15885.51056 | -15886.70012 | -15886.09894 | -15887.27721 | -15890.39242 | -15891.68570 |
| 12.47    | -15879.35850 | -15884.99038 | -15886.17613 | -15885.51056 | -15886.70012 | -15886.09894 | -15887.27722 | -15890.39243 | -15891.68570 |
| 12.57    | -15879.35849 | -15884.99037 | -15886.17613 | -15885.51056 | -15886.70011 | -15886.09895 | -15887.27722 | -15890.39243 | -15891.68570 |
| 12.66    | -15879.35849 | -15884.99037 | -15886.17612 | -15885.51055 | -15886.70011 | -15886.09896 | -15887.27723 | -15890.39243 | -15891.68569 |
| 12.76    | -15879.35848 | -15884.99036 | -15886.17611 | -15885.51055 | -15886.70011 | -15886.09896 | -15887.27724 | -15890.39243 | -15891.68569 |
| 12.85    | -15879.35848 | -15884.99036 | -15886.17611 | -15885.51055 | -15886.70011 | -15886.09897 | -15887.27724 | -15890.39243 | -15891.68569 |
| 12.94    | -15879.35847 | -15884.99035 | -15886.17610 | -15885.51055 | -15886.70010 | -15886.09898 | -15887.27725 | -15890.39243 | -15891.68569 |
| 13.04    | -15879.35847 | -15884.99035 | -15886.17610 | -15885.51055 | -15886.70010 | -15886.09898 | -15887.27726 | -15890.39243 | -15891.68568 |
| 13.13    | -15879.35846 | -15884.99034 | -15886.17609 | -15885.51055 | -15886.70010 | -15886.09899 | -15887.27726 | -15890.39243 | -15891.68569 |
| 13.23    | -15879.35846 | -15884.99035 | -15886.17609 | -15885.51055 | -15886.70010 | -15886.09900 | -15887.27727 | -15890.39243 | -15891.68569 |
| 13.32    | -15879.35846 | -15884.99034 | -15886.17609 | -15885.51055 | -15886.70010 | -15886.09900 | -15887.27728 | -15890.39243 | -15891.68569 |
| 13.42    | -15879.35845 | -15884.99034 | -15886.17609 | -15885.51055 | -15886.70010 | -15886.09901 | -15887.27729 | -15890.39243 | -15891.68569 |
| 13.51    | -15879.35845 | -15884.99034 | -15886.17609 | -15885.51055 | -15886.70010 | -15886.09902 | -15887.27729 | -15890.39244 | -15891.68569 |
| 13.61    | -15879.35845 | -15884.99034 | -15886.17609 | -15885.51055 | -15886.70010 | -15886.09902 | -15887.27730 | -15890.39244 | -15891.68569 |
| 13.70    | -15879.35844 | -15884.99034 | -15886.17609 | -15885.51055 | -15886.70010 | -15886.09903 | -15887.27730 | -15890.39244 | -15891.68569 |
| 13.80    | -15879.35844 | -15884.99033 | -15886.17608 | -15885.51055 | -15886.70010 | -15886.09903 | -15887.27731 | -15890.39244 | -15891.68569 |
| 13.89    | -15879.35844 | -15884.99033 | -15886.17608 | -15885.51055 | -15886.70010 | -15886.09904 | -15887.27731 | -15890.39244 | -15891.68569 |
| 13.98    | -15879.35844 | -15884.99033 | -15886.17608 | -15885.51055 | -15886.70009 | -15886.09904 | -15887.27732 | -15890.39244 | -15891.68569 |
| 14.08    | -15879.35843 | -15884.99033 | -15886.17607 | -15885.51055 | -15886.70009 | -15886.09905 | -15887.27732 | -15890.39244 | -15891.68568 |
| 14.17    | -15879.35843 | -15884.99033 | -15886.17607 | -15885.51054 | -15886.70009 | -15886.09905 | -15887.27732 | -15890.39244 | -15891.68568 |
| 14.27    | -15879.35843 | -15884.99032 | -15886.17607 | -15885.51054 | -15886.70009 | -15886.09905 | -15887.27732 | -15890.39243 | -15891.68568 |
| 14.36    | -15879.35843 | -15884.99032 | -15886.17607 | -15885.51054 | -15886.70009 | -15886.09906 | -15887.27733 | -15890.39243 | -15891.68568 |
| 14.46    | -15879.35843 | -15884.99032 | -15886.17607 | -15885.51054 | -15886.70009 | -15886.09906 | -15887.27733 | -15890.39243 | -15891.68567 |
| 14.55    | -15879.35842 | -15884.99032 | -15886.17606 | -15885.51054 | -15886.70008 | -15886.09906 | -15887.27733 | -15890.39243 | -15891.68567 |
| 14.65    | -15879.35842 | -15884.99032 | -15886.17606 | -15885.51054 | -15886.70008 | -15886.09906 | -15887.27734 | -15890.39243 | -15891.68567 |
| 14.74    | -15879.35842 | -15884.99032 | -15886.17606 | -15885.51054 | -15886.70008 | -15886.09907 | -15887.27734 | -15890.39243 | -15891.68567 |
| 14.83    | -15879.35842 | -15884.99032 | -15886.17606 | -15885.51054 | -15886.70008 | -15886.09907 | -15887.27734 | -15890.39243 | -15891.68567 |
| 14.93    | -15879.35842 | -15884.99032 | -15886.17606 | -15885.51054 | -15886.70008 | -15886.09907 | -15887.27734 | -15890.39243 | -15891.68567 |
| 15.02    | -15879.35842 | -15884.99032 | -15886.17606 | -15885.51054 | -15886.70008 | -15886.09908 | -15887.27734 | -15890.39243 | -15891.68567 |
| 15.12    | -15879.35842 | -15884.99032 | -15886.17606 | -15885.51054 | -15886.70008 | -15886.09908 | -15887.27734 | -15890.39243 | -15891.68567 |
| 15.21    | -15879.35841 | -15884.99032 | -15886.17606 | -15885.51054 | -15886.70008 | -15886.09908 | -15887.27734 | -15890.39243 | -15891.68567 |
| 15.31    | -15879.35841 | -15884.99032 | -15886.17606 | -15885.51054 | -15886.70009 | -15886.09909 | -15887.27734 | -15890.39243 | -15891.68567 |
| 15.40    | -15879.35841 | -15884.99032 | -15886.17606 | -15885.51054 | -15886.70009 | -15886.09909 | -15887.27734 | -15890.39243 | -15891.68567 |
| 15.50    | -15879.35841 | -15884.99032 | -15886.17606 | -15885.51054 | -15886.70009 | -15886.09909 | -15887.27734 | -15890.39243 | -15891.68567 |
| 15.59    | -15879.35841 | -15884.99032 | -15886.17606 | -15885.51054 | -15886.70009 | -15886.09909 | -15887.27734 | -15890.39243 | -15891.68567 |
| 15.68    | -15879.35841 | -15884.99032 | -15886.17606 | -15885.51054 | -15886.70008 | -15886.09909 | -15887.27734 | -15890.39243 | -15891.68567 |
| 15.78    | -15879.35841 | -15884.99032 | -15886.17606 | -15885.51054 | -15886.70008 | -15886.09910 | -15887.27734 | -15890.39243 | -15891.68567 |
| 15.87    | -15879.35841 | -15884.99032 | -15886.17606 | -15885.51054 | -15886.70008 | -15886.09910 | -15887.27734 | -15890.39243 | -15891.68567 |
| 15.97    | -15879.35841 | -15884.99032 | -15886.17606 | -15885.51054 | -15886.70008 | -15886.09910 | -15887.27734 | -15890.39243 | -15891.68567 |
| 16.06    | -15879.35841 | -15884.99032 | -15886.17606 | -15885.51054 | -15886.70008 | -15886.09910 | -15887.27734 | -15890.39243 | -15891.68567 |

Table S25: The absolute energies in hartree of the potential energy curve of TaSi in the  $^4\Pi$  state with a SP-based wave function and nom-CPO active space.

| Distance | SP           | tpbe         | ftpbe        | trevpbe      | ftrevpbe     | tblyp        | ftblyp       | torelyp      | ftorelyp     |
|----------|--------------|--------------|--------------|--------------|--------------|--------------|--------------|--------------|--------------|
| 16.16    | -15879.35841 | -15884.99031 | -15886.17606 | -15885.51054 | -15886.70008 | -15886.09910 | -15887.27734 | -15890.39243 | -15891.68567 |
| 16.25    | -15879.35841 | -15884.99031 | -15886.17606 | -15885.51054 | -15886.70008 | -15886.09910 | -15887.27734 | -15890.39243 | -15891.68567 |
| 16.35    | -15879.35841 | -15884.99031 | -15886.17606 | -15885.51054 | -15886.70008 | -15886.09910 | -15887.27734 | -15890.39243 | -15891.68567 |
| 16.44    | -15879.35841 | -15884.99031 | -15886.17606 | -15885.51054 | -15886.70008 | -15886.09910 | -15887.27734 | -15890.39243 | -15891.68567 |
| 16.54    | -15879.35841 | -15884.99031 | -15886.17606 | -15885.51054 | -15886.70008 | -15886.09910 | -15887.27734 | -15890.39243 | -15891.68567 |
| 16.63    | -15879.35841 | -15884.99031 | -15886.17606 | -15885.51053 | -15886.70008 | -15886.09910 | -15887.27734 | -15890.39243 | -15891.68567 |
| 16.72    | -15879.35841 | -15884.99031 | -15886.17606 | -15885.51053 | -15886.70008 | -15886.09910 | -15887.27734 | -15890.39243 | -15891.68567 |
| 16.82    | -15879.35841 | -15884.99031 | -15886.17606 | -15885.51053 | -15886.70008 | -15886.09910 | -15887.27734 | -15890.39243 | -15891.68567 |
| 16.91    | -15879.35841 | -15884.99031 | -15886.17606 | -15885.51054 | -15886.70008 | -15886.09911 | -15887.27734 | -15890.39243 | -15891.68567 |
| 17.01    | -15879.35841 | -15884.99031 | -15886.17606 | -15885.51054 | -15886.70008 | -15886.09911 | -15887.27734 | -15890.39243 | -15891.68567 |
| 17.10    | -15879.35841 | -15884.99031 | -15886.17606 | -15885.51054 | -15886.70008 | -15886.09911 | -15887.27734 | -15890.39243 | -15891.68567 |
| 17.20    | -15879.35841 | -15884.99031 | -15886.17606 | -15885.51054 | -15886.70008 | -15886.09911 | -15887.27734 | -15890.39243 | -15891.68567 |
| 17.29    | -15879.35841 | -15884.99031 | -15886.17606 | -15885.51054 | -15886.70008 | -15886.09911 | -15887.27734 | -15890.39243 | -15891.68567 |
| 17.39    | -15879.35841 | -15884.99031 | -15886.17606 | -15885.51054 | -15886.70008 | -15886.09911 | -15887.27734 | -15890.39243 | -15891.68567 |
| 17.48    | -15879.35841 | -15884.99031 | -15886.17606 | -15885.51054 | -15886.70008 | -15886.09911 | -15887.27734 | -15890.39243 | -15891.68567 |
| 17.57    | -15879.35841 | -15884.99031 | -15886.17606 | -15885.51054 | -15886.70008 | -15886.09911 | -15887.27734 | -15890.39243 | -15891.68567 |
| 17.67    | -15879.35841 | -15884.99031 | -15886.17606 | -15885.51054 | -15886.70008 | -15886.09911 | -15887.27734 | -15890.39243 | -15891.68567 |
| 17.76    | -15879.35841 | -15884.99031 | -15886.17606 | -15885.51054 | -15886.70008 | -15886.09911 | -15887.27734 | -15890.39243 | -15891.68567 |
| 17.86    | -15879.35841 | -15884.99031 | -15886.17606 | -15885.51054 | -15886.70008 | -15886.09911 | -15887.27734 | -15890.39243 | -15891.68567 |
| 17.95    | -15879.35841 | -15884.99031 | -15886.17606 | -15885.51054 | -15886.70008 | -15886.09911 | -15887.27734 | -15890.39243 | -15891.68567 |
| 18.05    | -15879.35841 | -15884.99031 | -15886.17606 | -15885.51054 | -15886.70008 | -15886.09911 | -15887.27734 | -15890.39243 | -15891.68566 |
